# Supplementary material
Source: PubMed Central journal article supplement (PMC3752378)

## Supporting Information

### Suzuki-Miyaura Cross-Coupling of Potassium Trifluoro(*N*-Methylheteroaryl)borates with Aryl and Heteroaryl Halides

Gary A. Molander,<sup>†\*</sup> DaWeon Ryu,<sup>†</sup> Mona Hosseini-Sarvari,<sup>†,‡</sup> Rammohan Devulapally,<sup>#</sup> Dave G. Seapy<sup>#</sup>

<sup>†</sup>Roy and Diana Vagelos Laboratories, Department of Chemistry, University of Pennsylvania, Philadelphia, Pennsylvania 19104-6323

<sup>‡</sup>Department of Chemistry, Faculty of Science, Shiraz University, Shiraz, 71454, Iran

<sup>#</sup>Department of Chemistry, Texas A&M University at Qatar, PO Box 23874, Doha, Qatar.

gmolandr@sas.upenn.edu

#### Contents

Copies of spectra of products

S2

$^1\text{H}$  NMR (DMSO, 500 MHz) spectrum of trifluoro(*N*-methylpyrazolo)borate (**1a**)

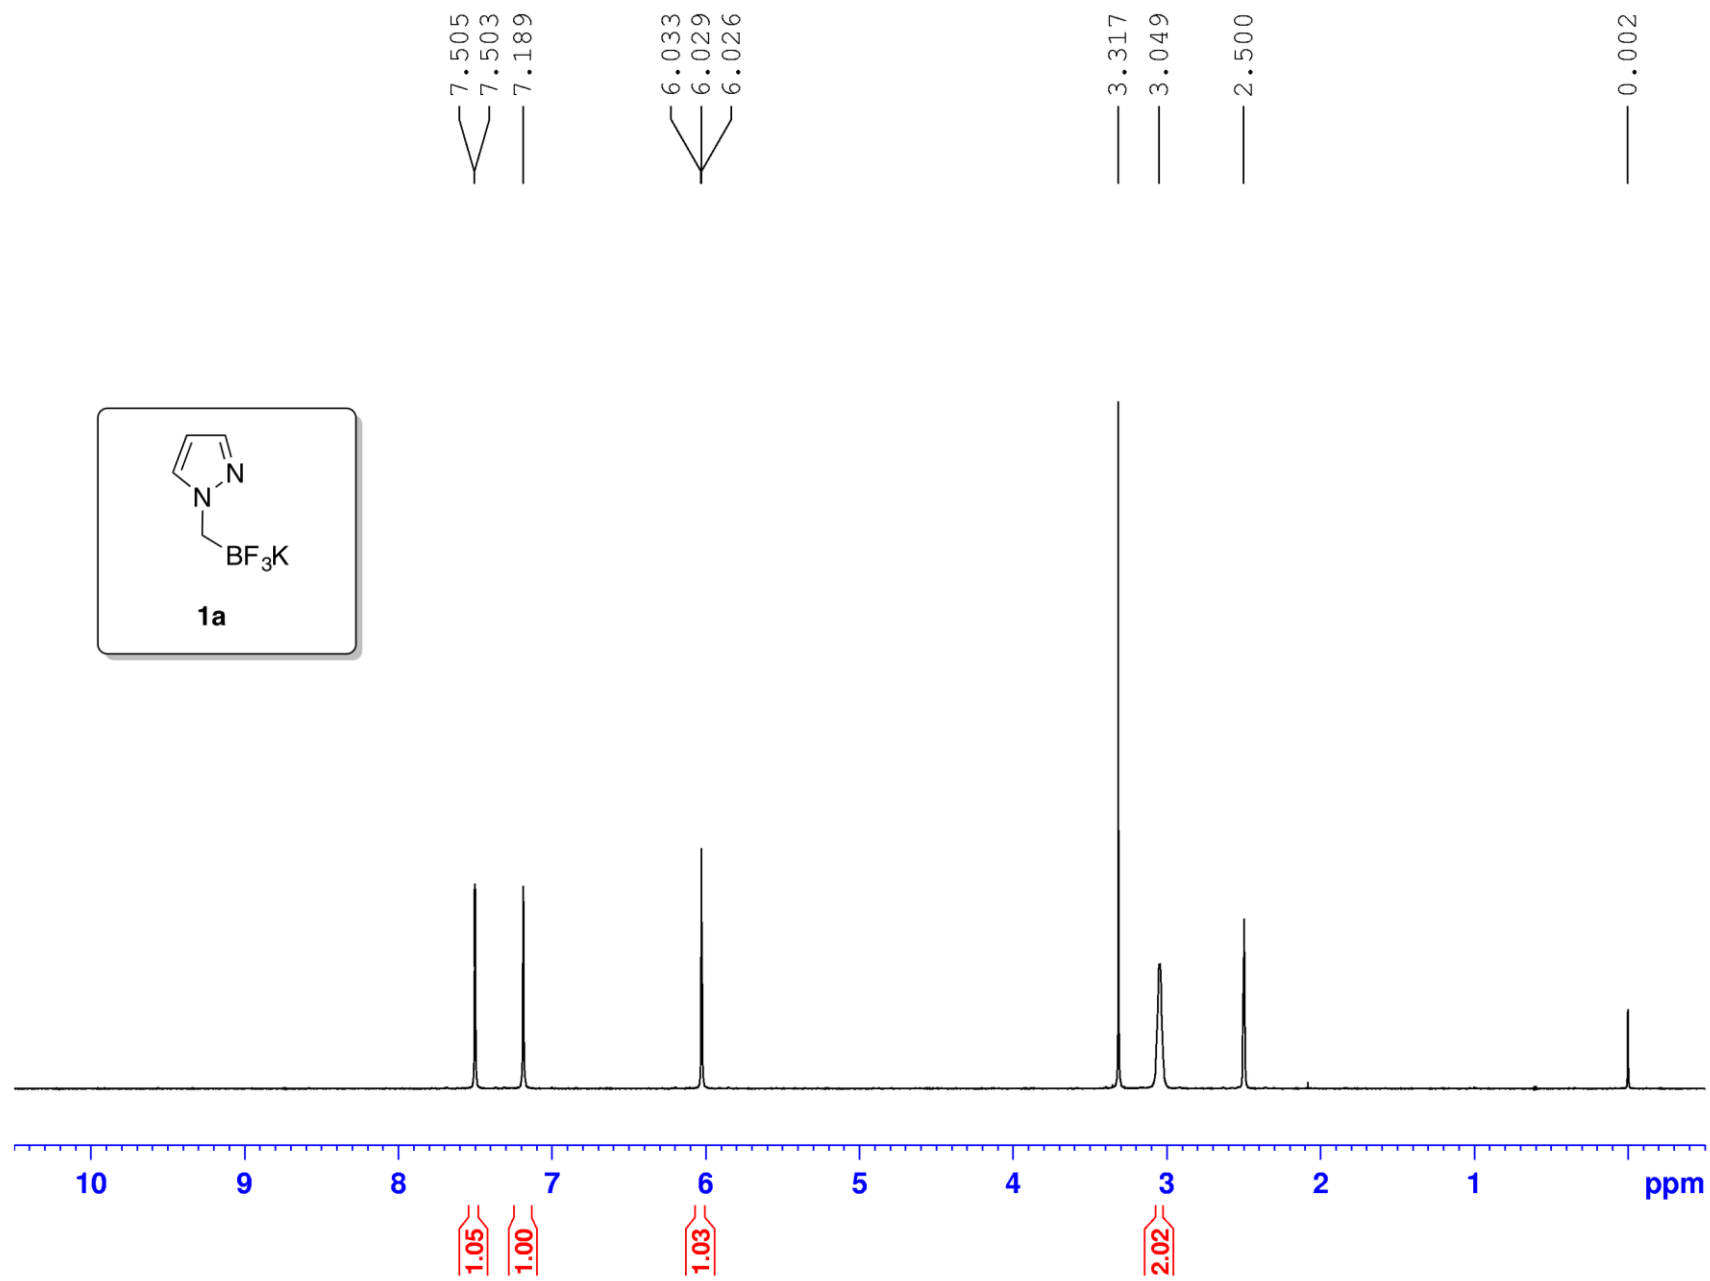

$^{13}\text{C}$  NMR (DMSO, 125.8 MHz) spectrum of trifluoro(*N*-methylpyrazolo)borate (**1a**)

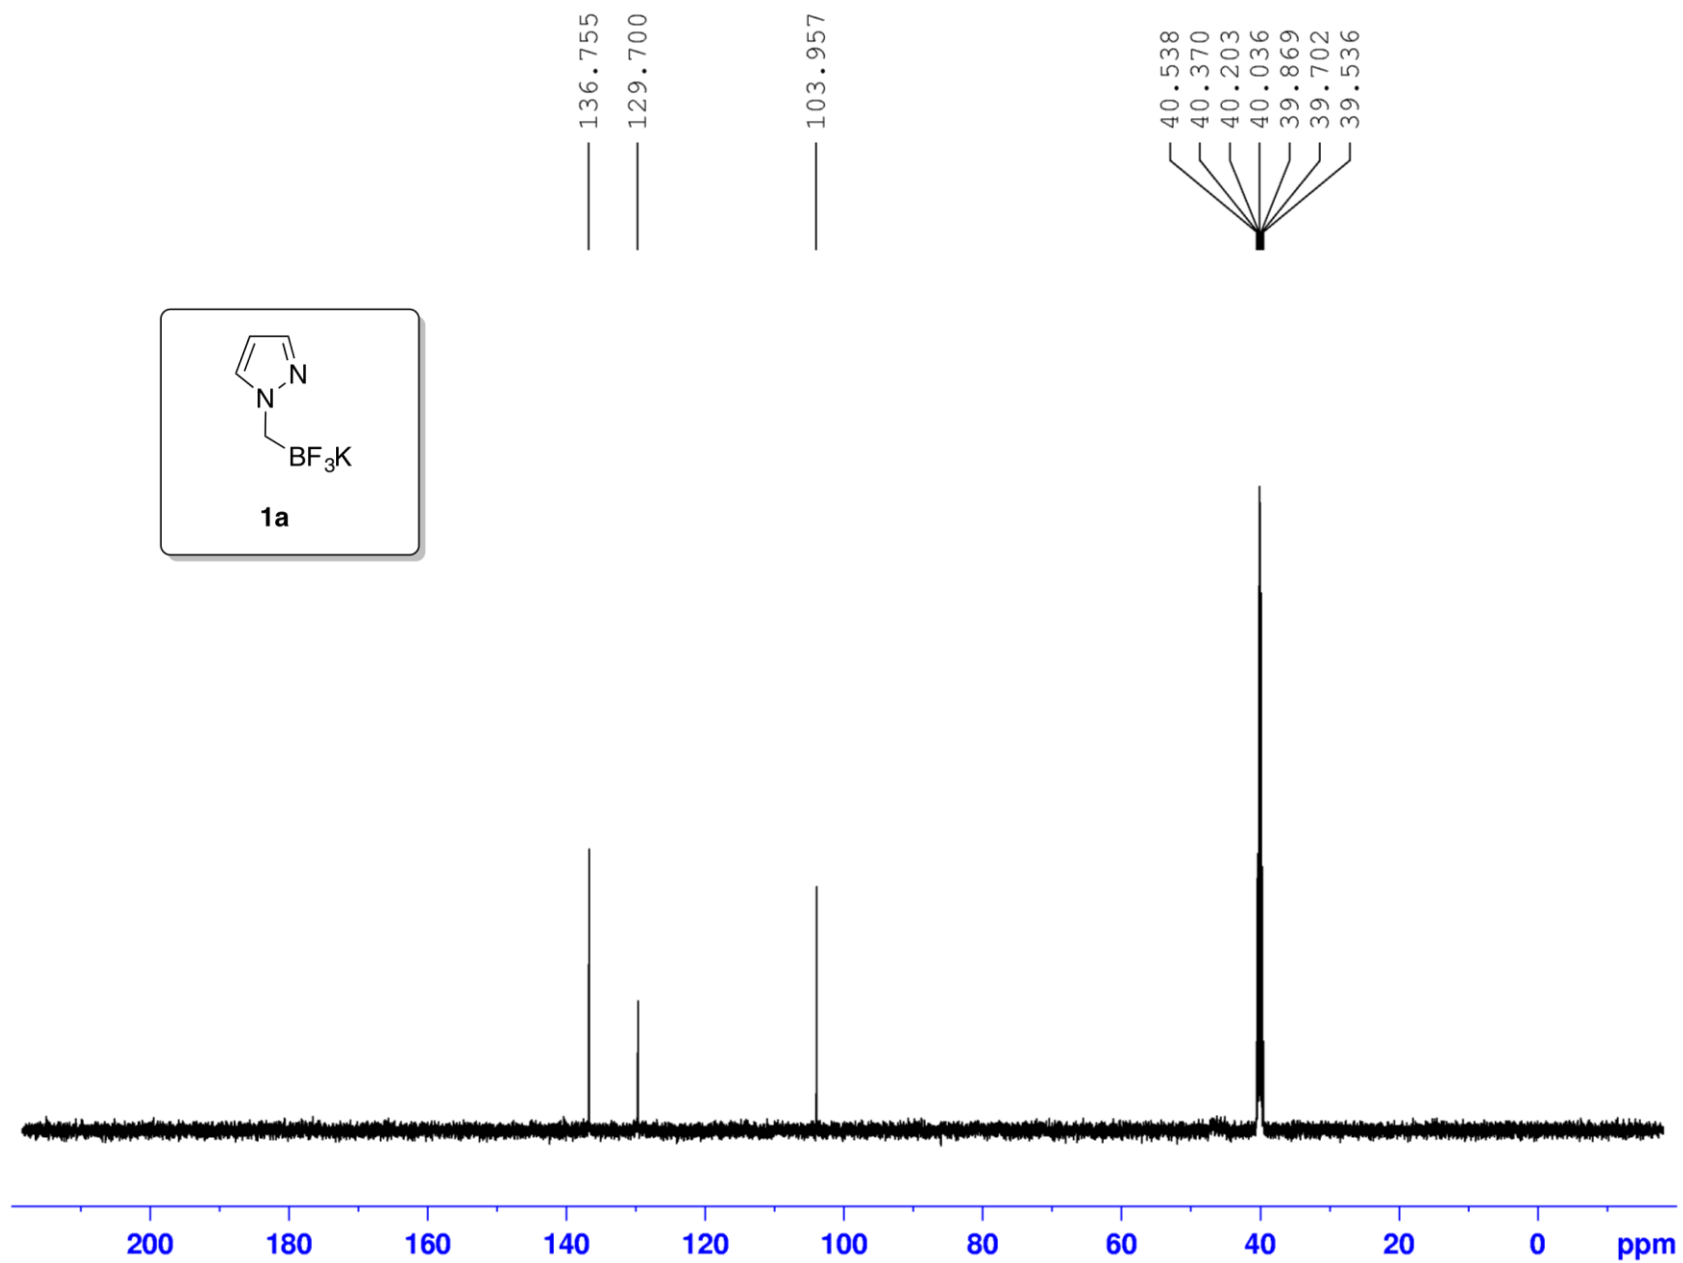

$^{19}\text{F}$  NMR (DMSO, 470.8 MHz) spectrum of trifluoro(*N*-methylpyrazolo)borate (**1a**)

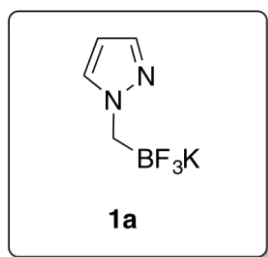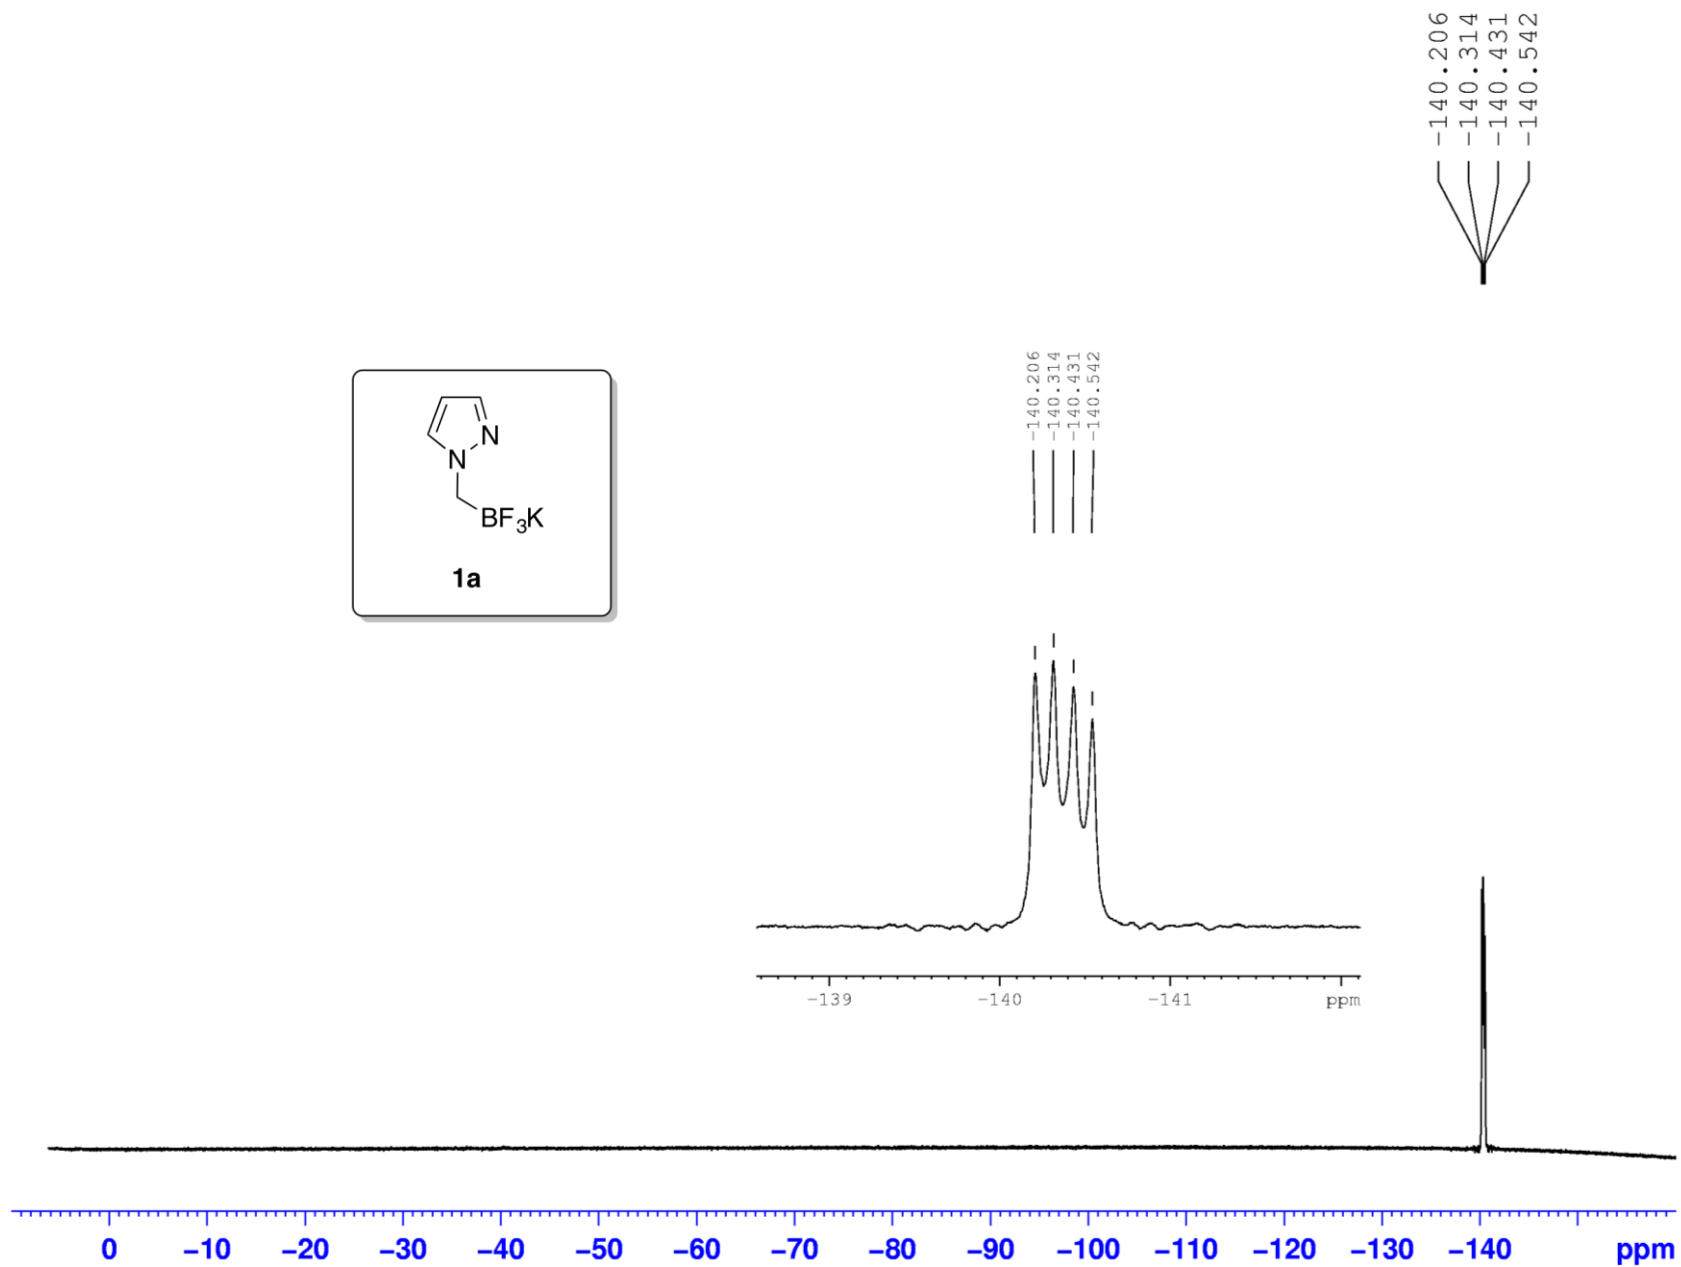

$^{11}\text{B}$  NMR (DMSO, 400 MHz) spectrum of trifluoro(*N*-methylpyrazolo)borate (**1a**)

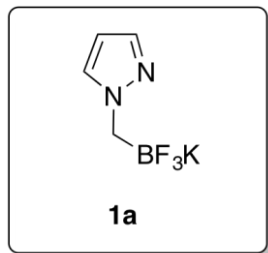

3.759  
3.339  
2.913  
2.494

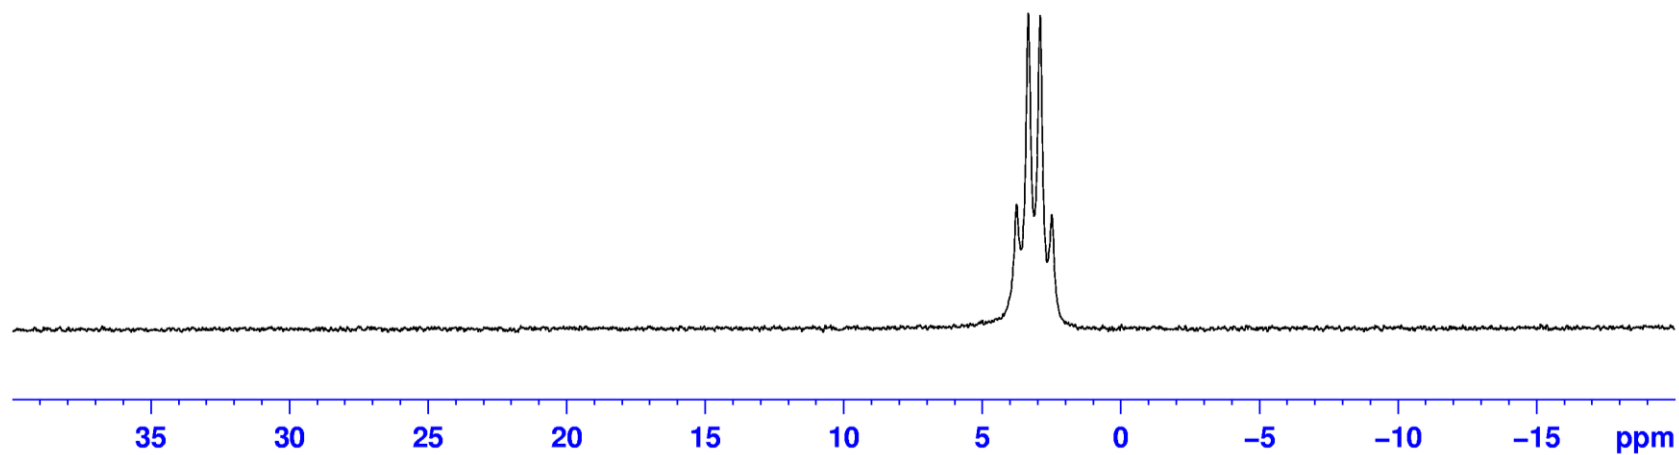

$^1\text{H}$  NMR (DMSO, 500 MHz) spectrum of trifluoro(*N*-methylpyrrolo)borate (**1b**)

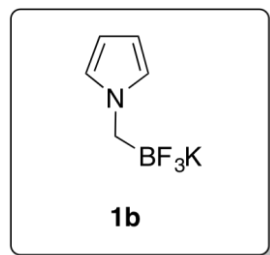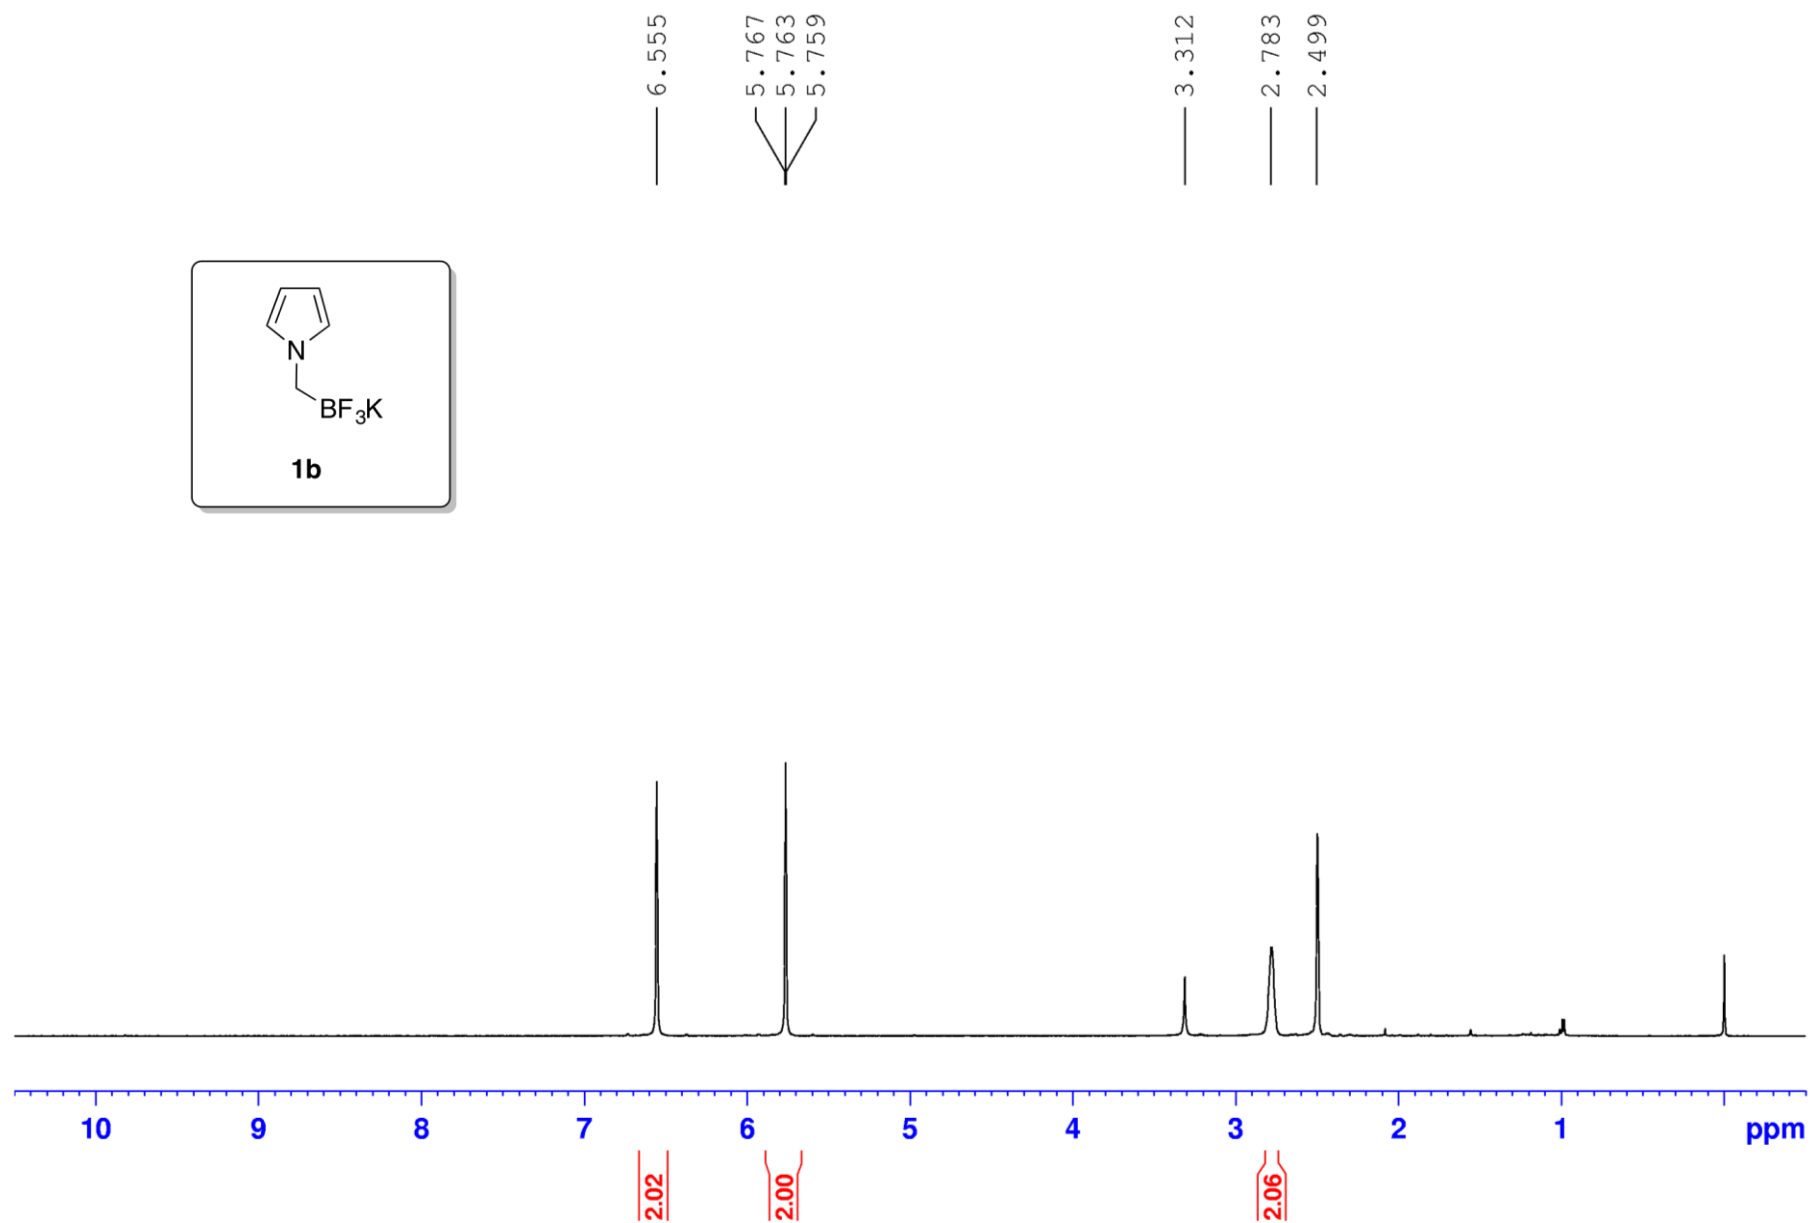

$^{13}\text{C}$  NMR (DMSO, 125.8 MHz) spectrum of trifluoro(*N*-methylpyrrolo)borate (**1b**)

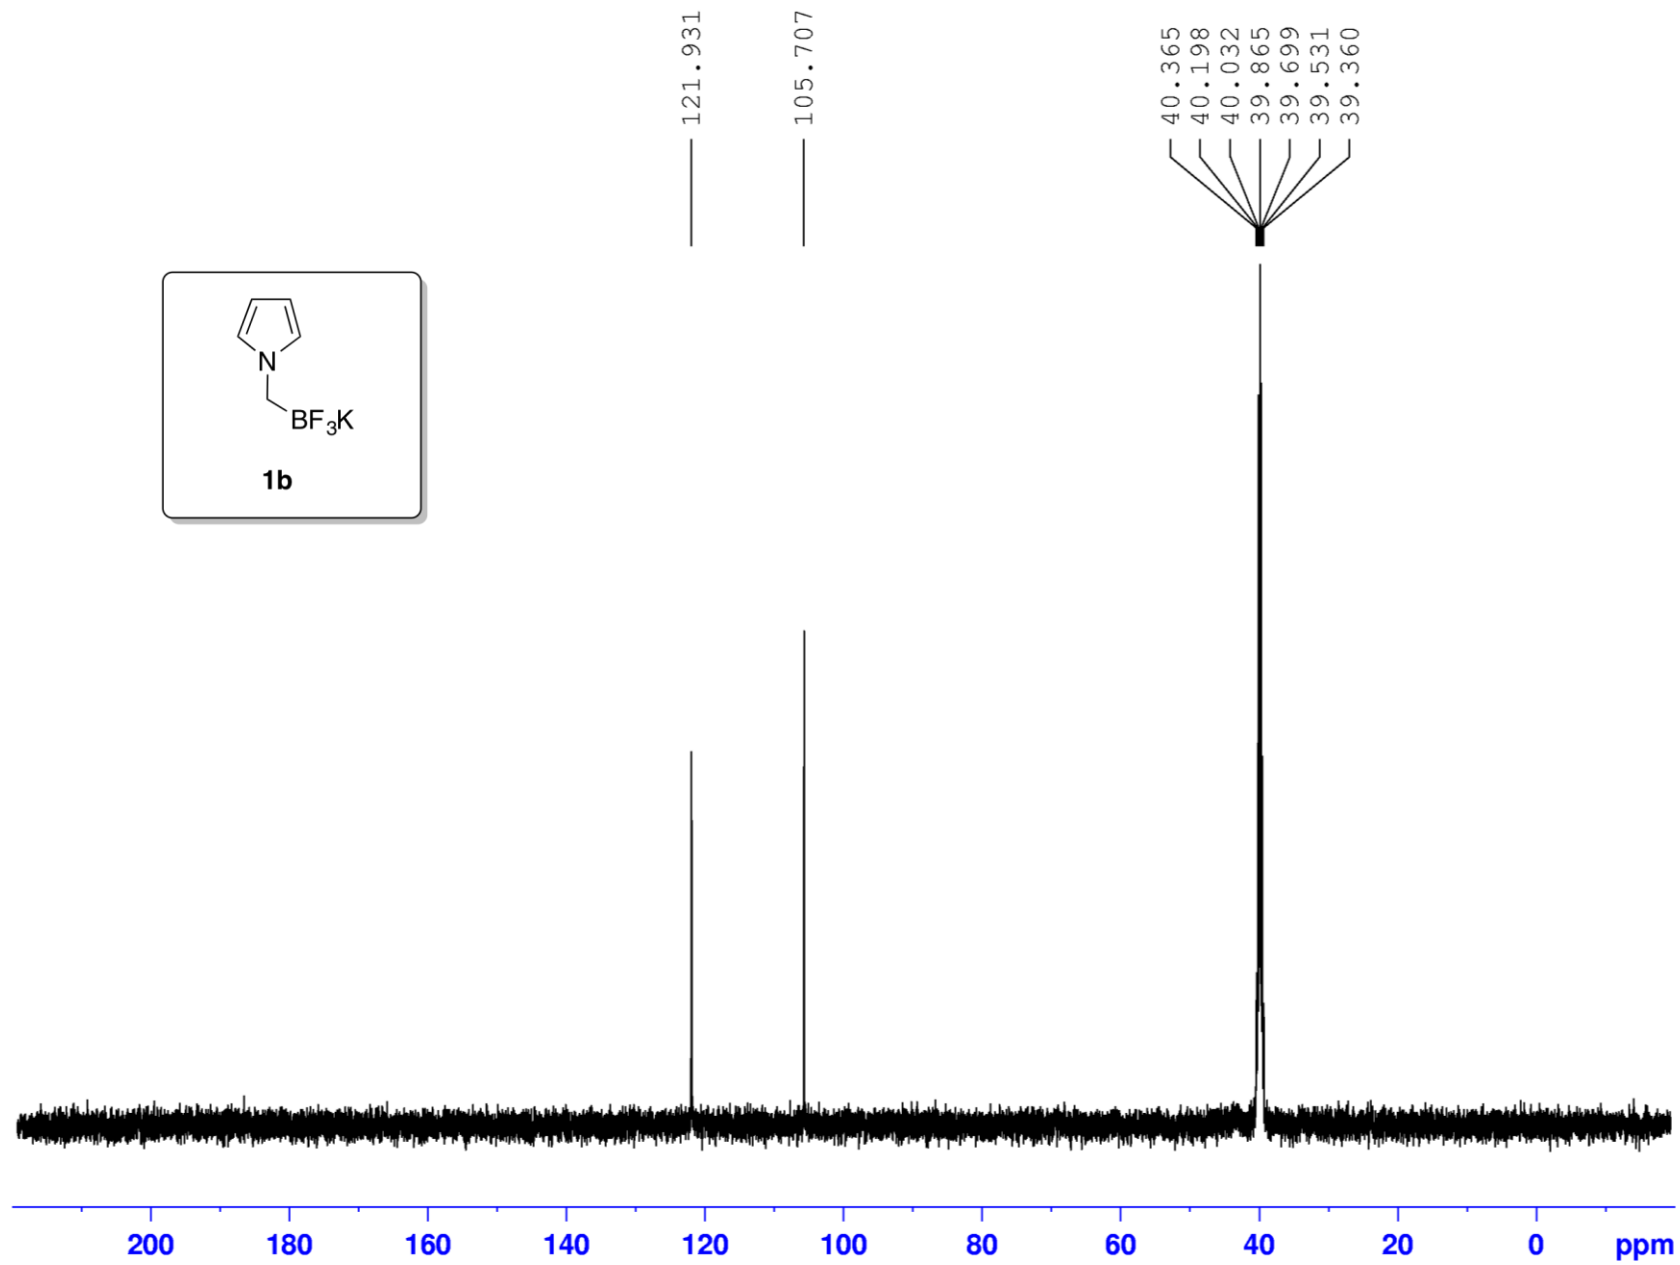

$^{19}\text{F}$  NMR (DMSO, 470.8 MHz) spectrum of trifluoro(*N*-methylpyrrolo)borate (**1b**)

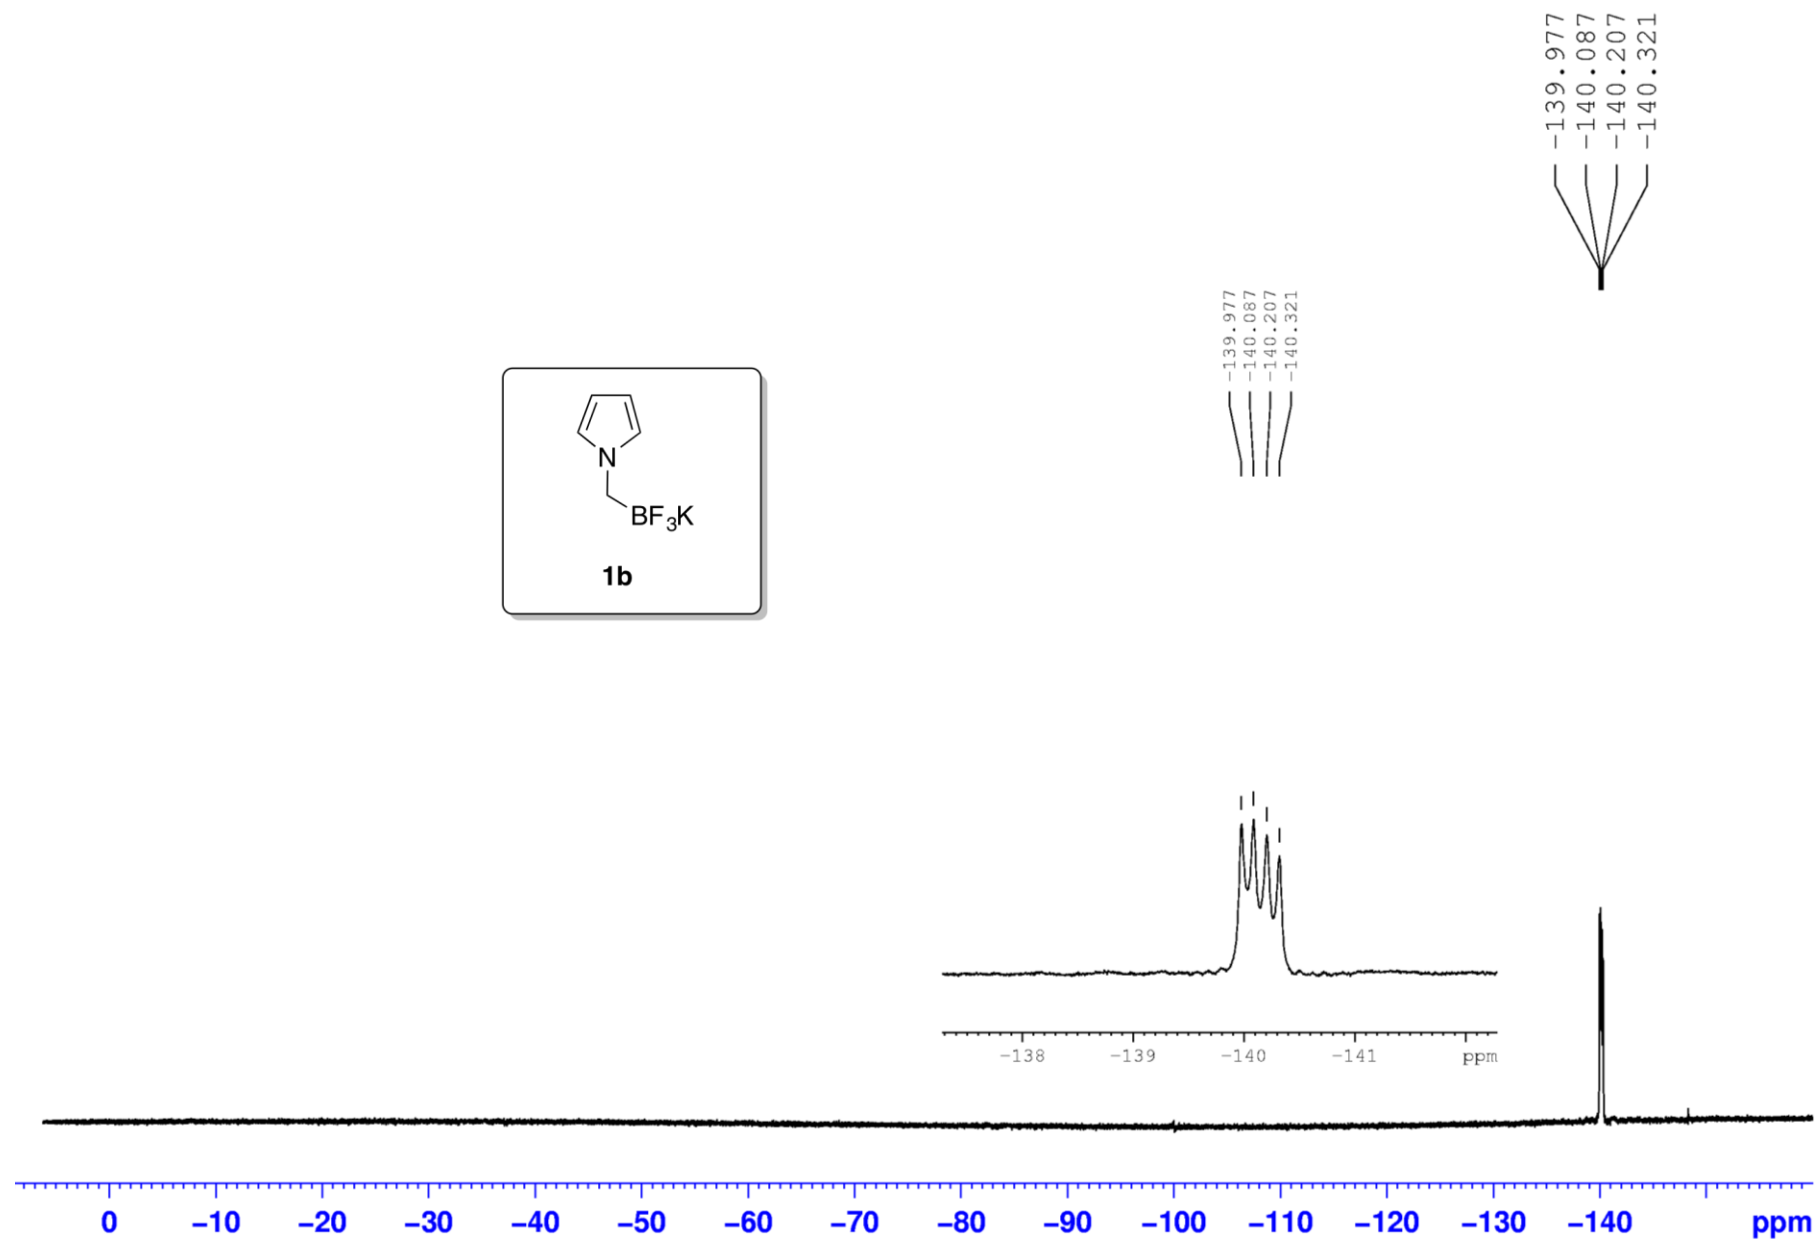



$^{11}\text{B}$  NMR (DMSO, 400 MHz) spectrum of trifluoro(*N*-methylpyrrolo)borate (**1b**)

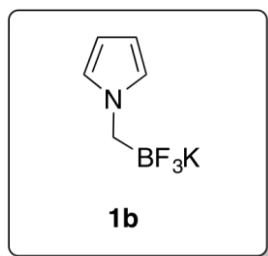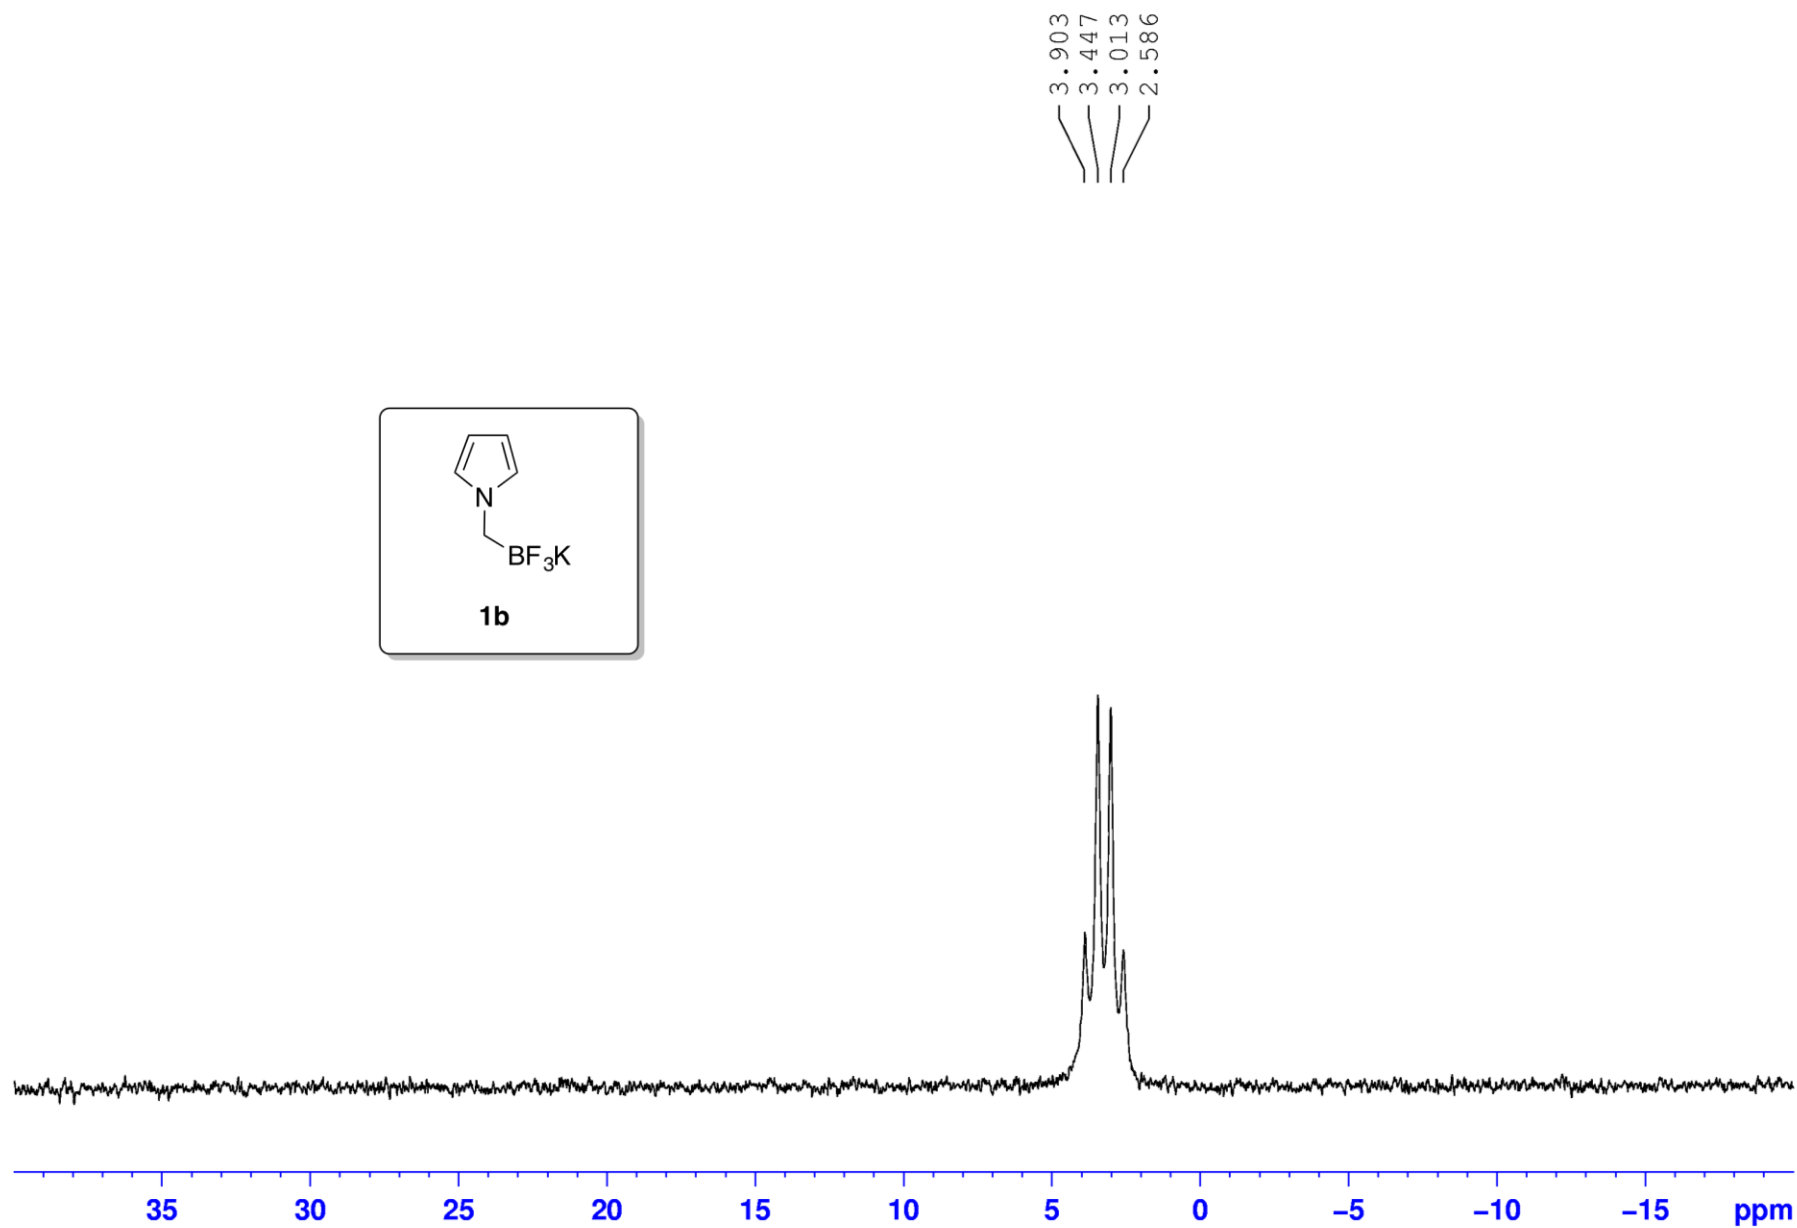

$^1\text{H}$  NMR (DMSO, 300 MHz) spectrum of trifluoro(*N*-methylindolo)borate (**1c**)

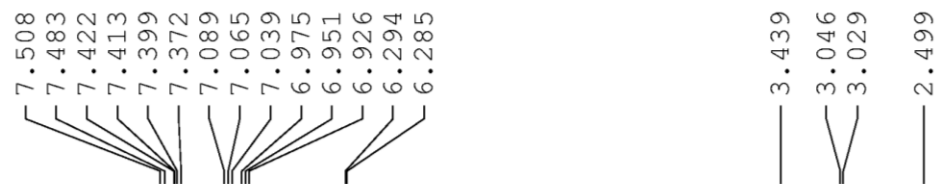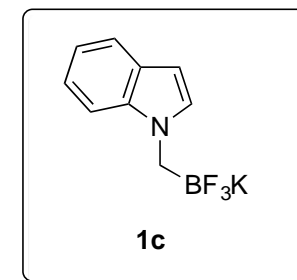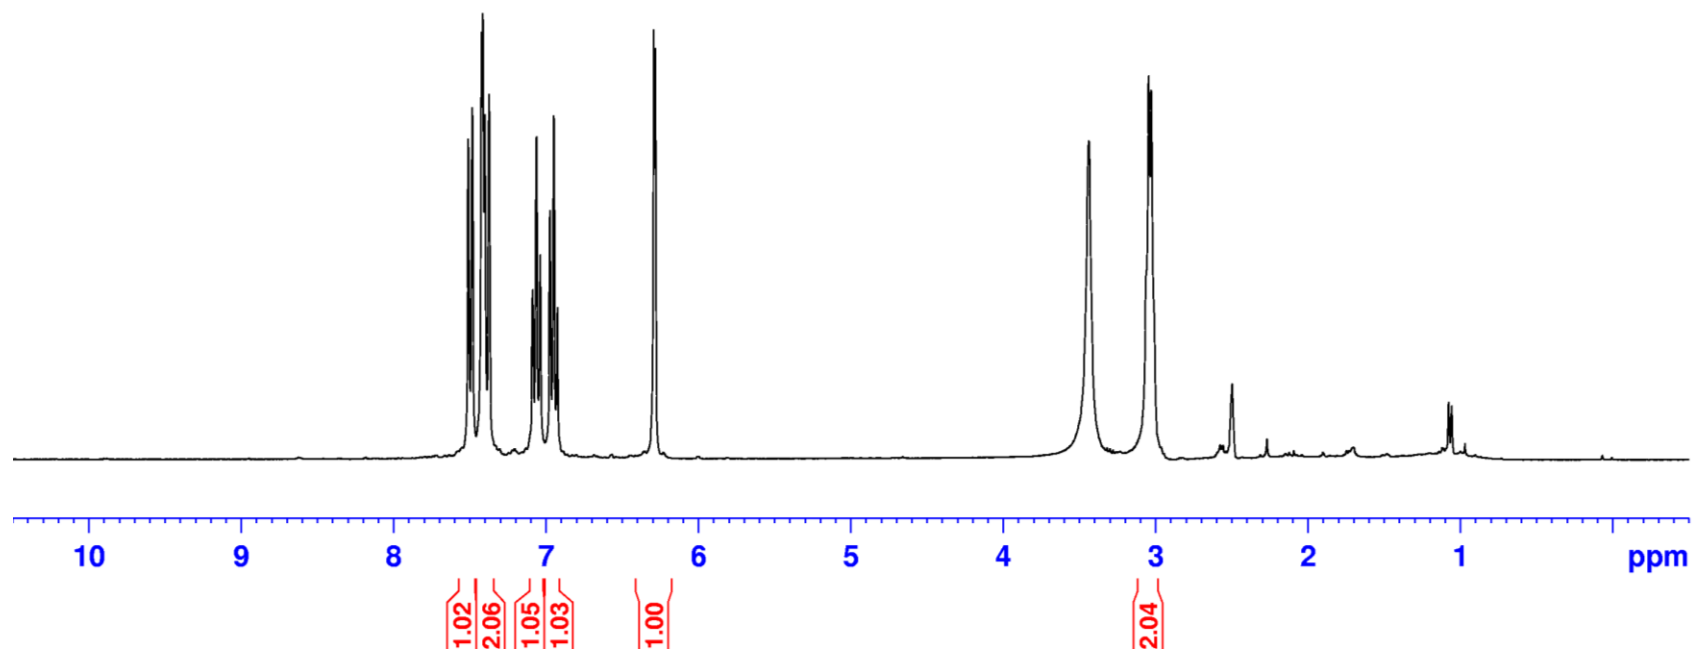

$^{13}\text{C}$  NMR (DMSO, 75.4 MHz) spectrum of trifluoro(*N*-methylindolo)borate (**1c**)

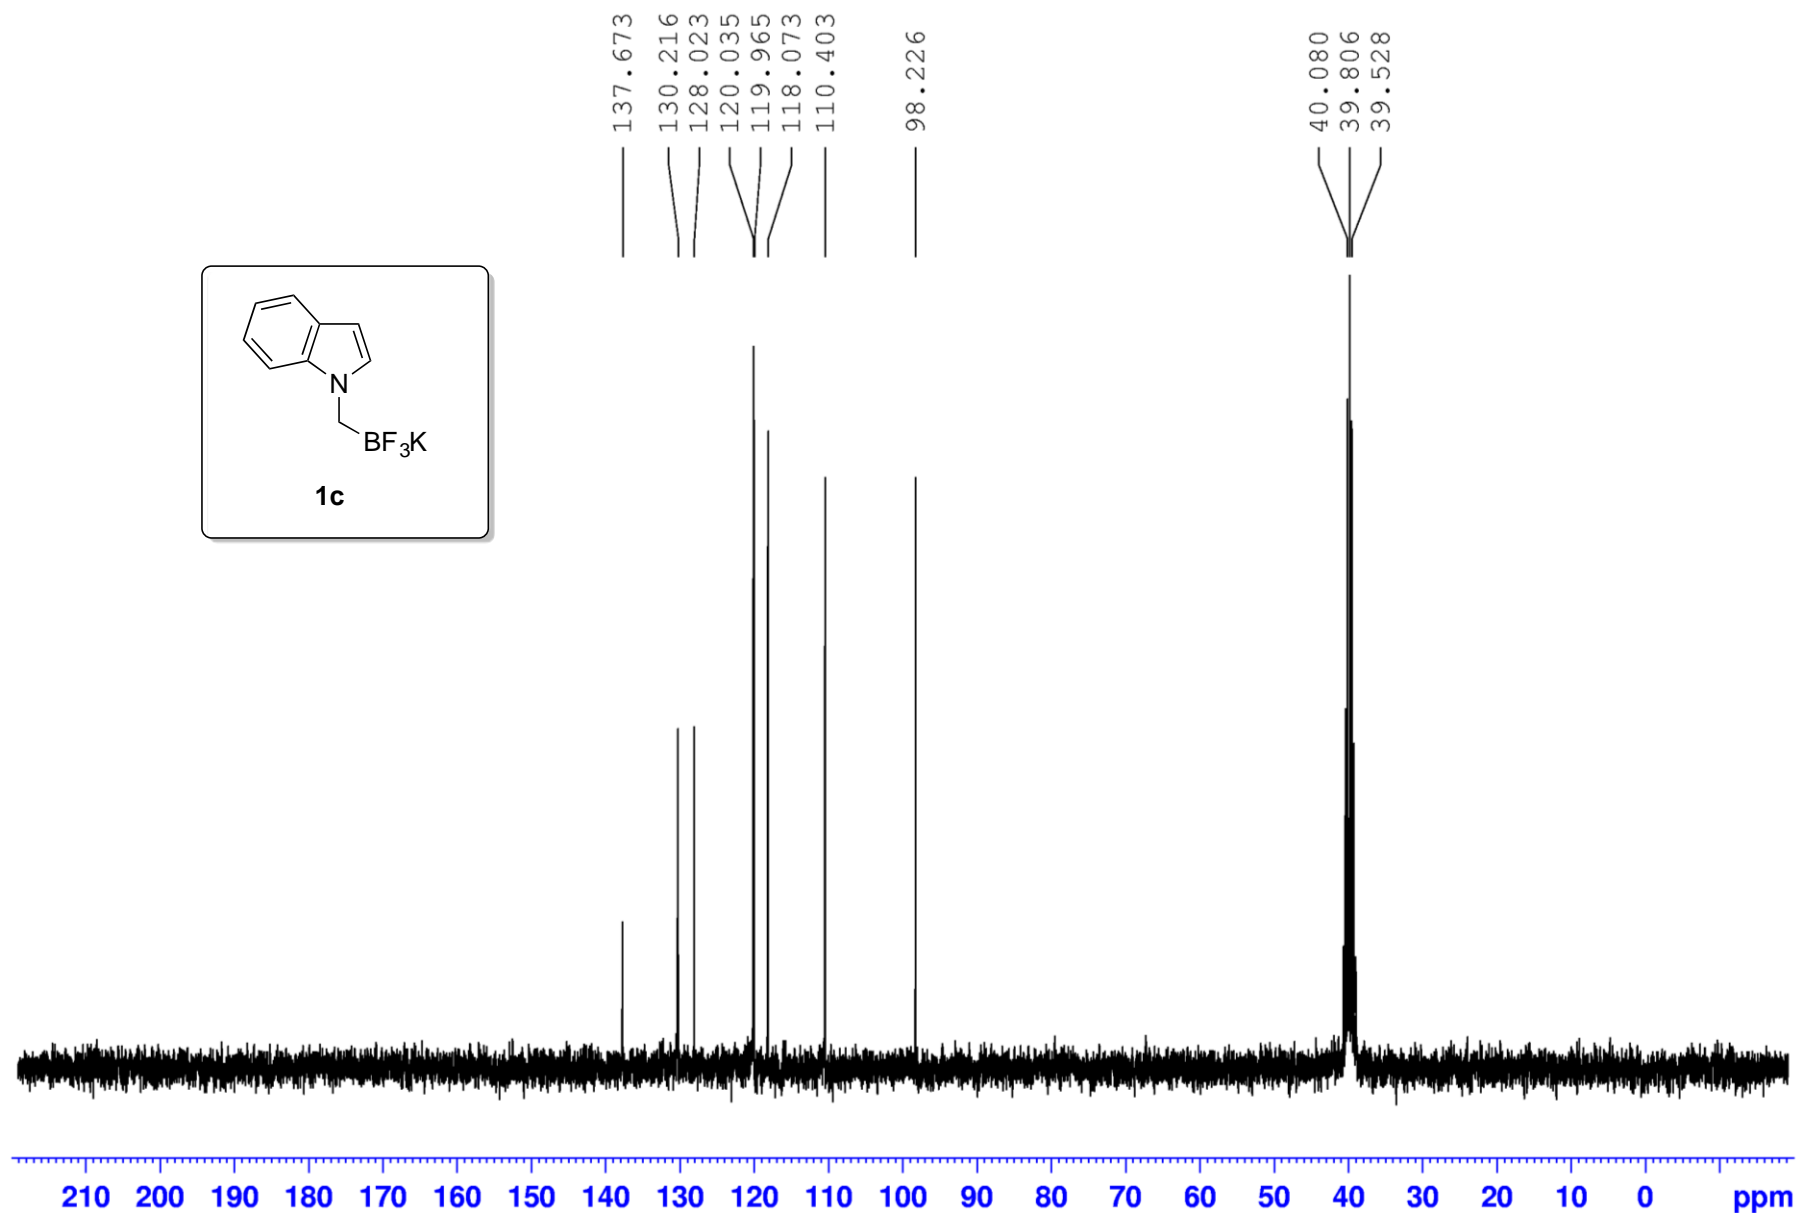

$^{19}\text{F}$  NMR (DMSO, 282.4 MHz) spectrum of trifluoro(*N*-methylindolo)borate (**1c**)

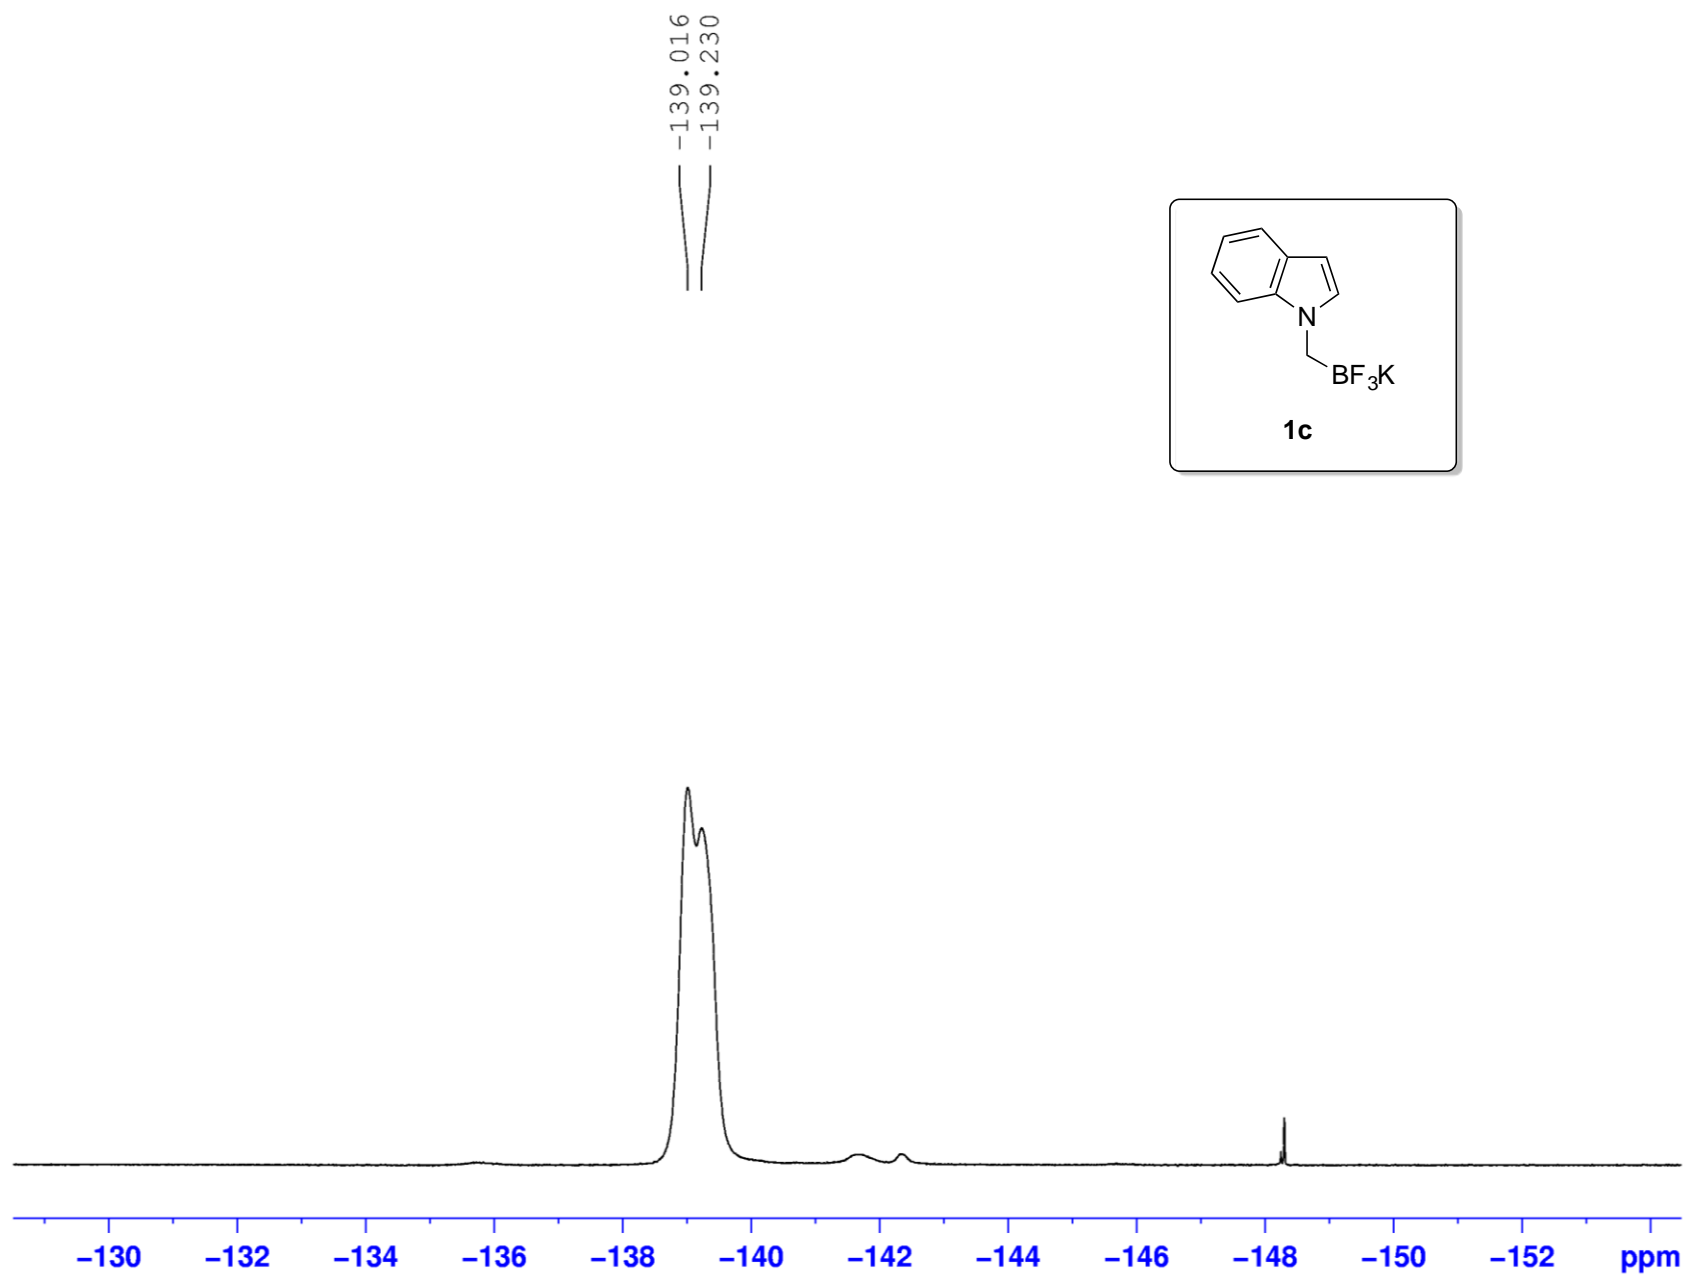

$^{11}\text{B}$  NMR (DMSO, 128.3 MHz) spectrum of trifluoro(*N*-methylindolo)borate (**1c**)

— 2.272

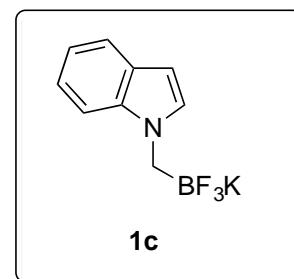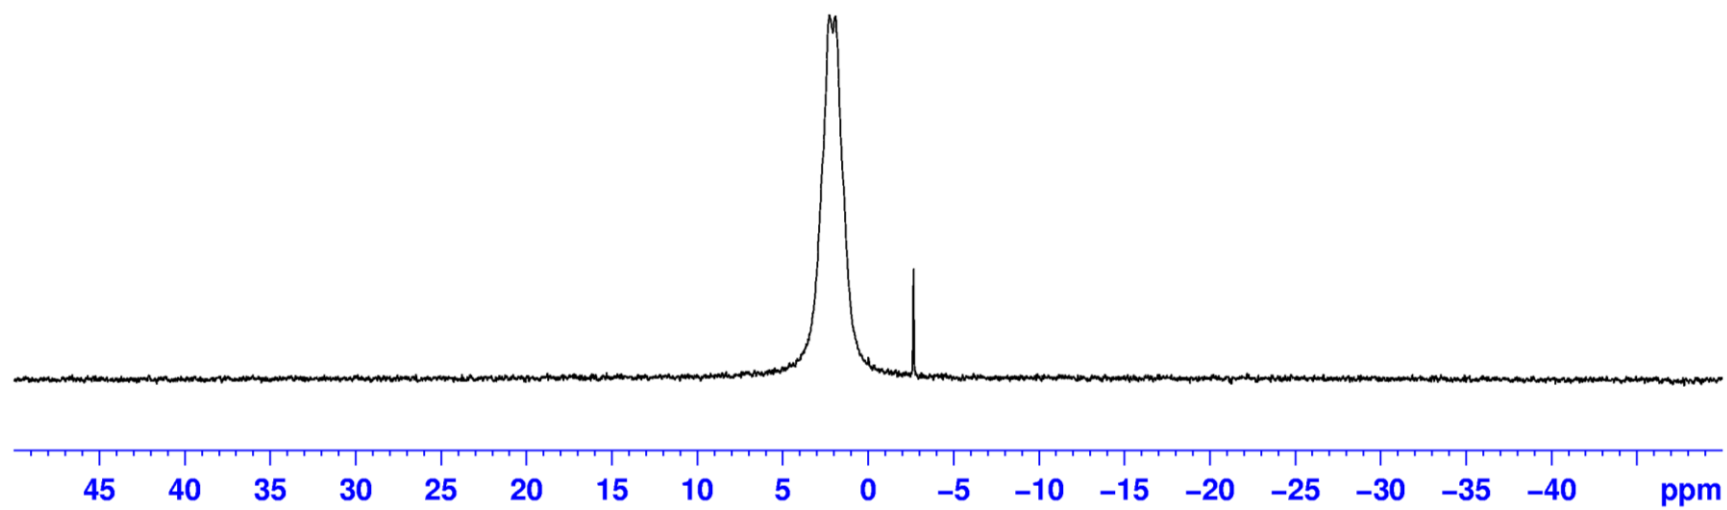

$^1\text{H}$  NMR ( $\text{CDCl}_3$ , 500 MHz) spectrum of 1-(4-methoxybenzyl)-1*H*-pyrrole (**2a**)

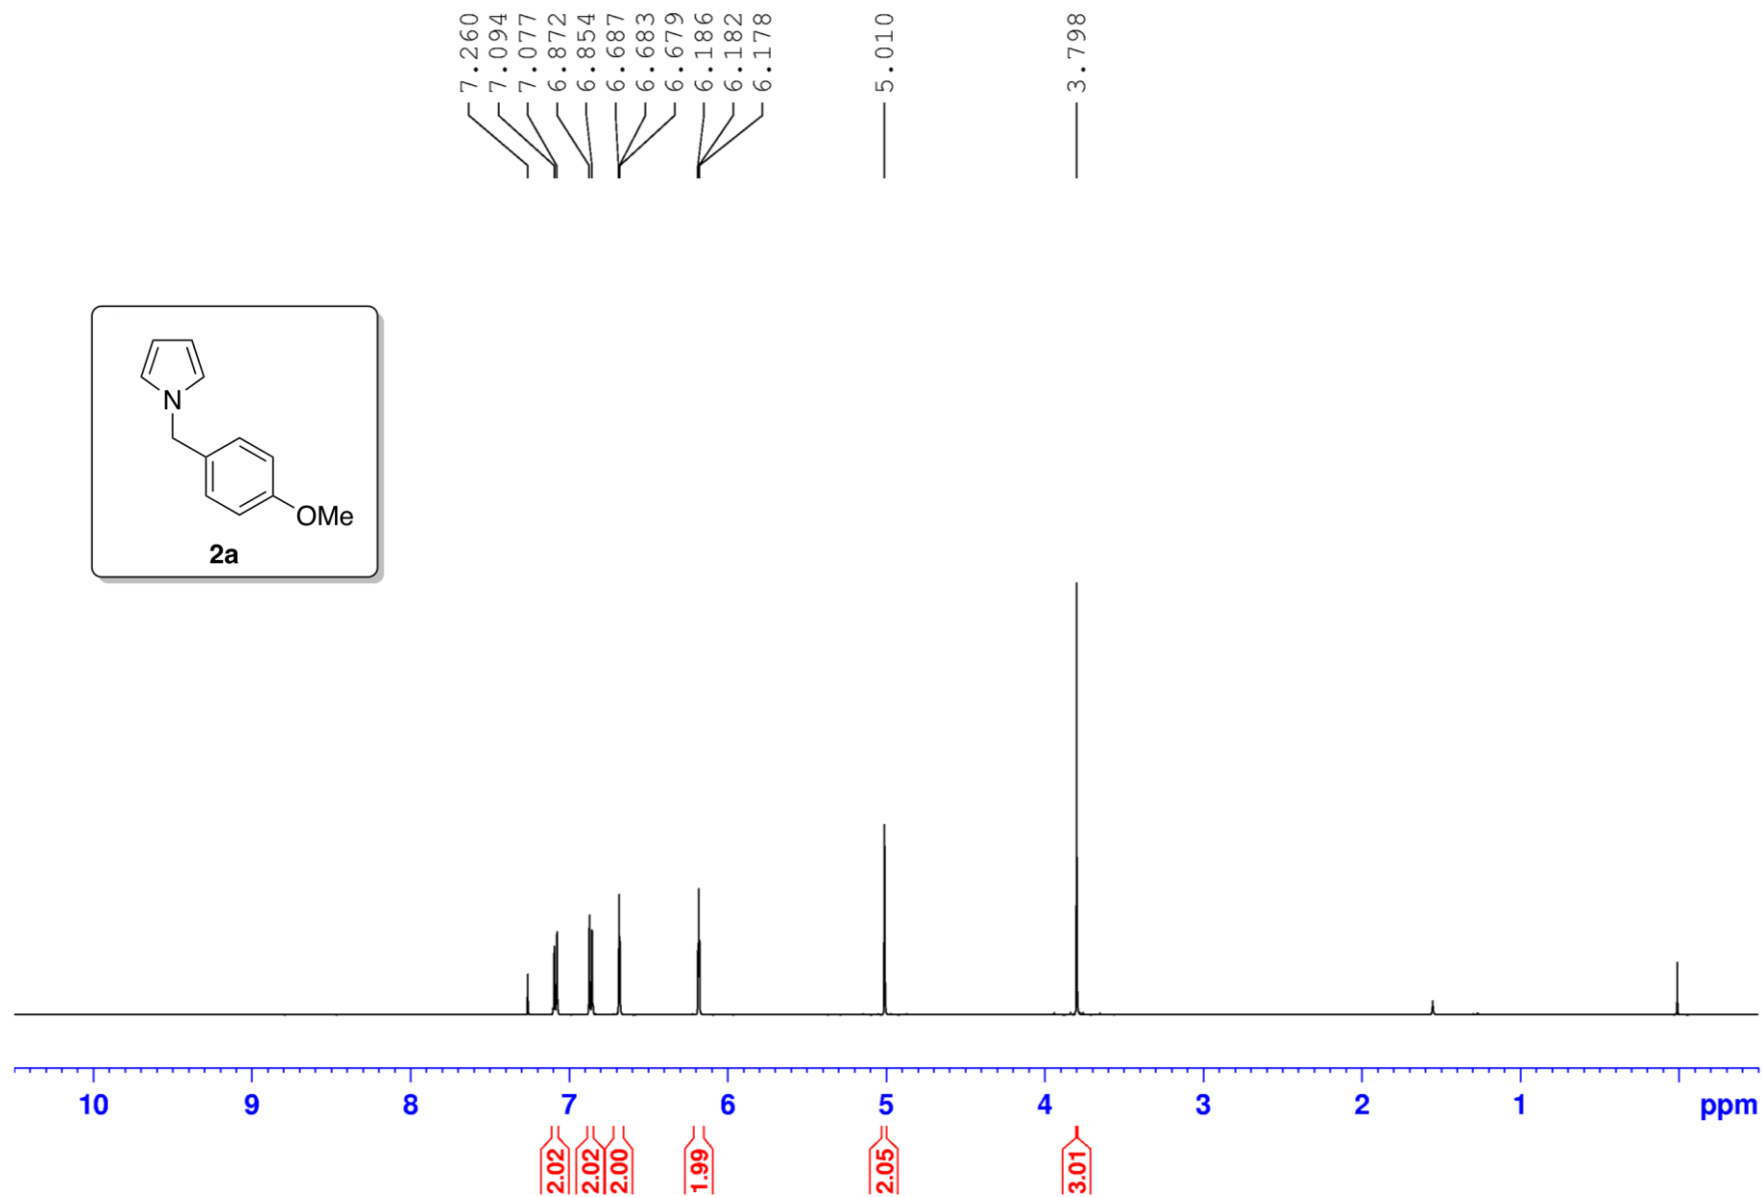

$^{13}\text{C}$  NMR ( $\text{CDCl}_3$ , 125.8 MHz) spectrum of 1-(4-methoxybenzyl)-1*H*-pyrrole (**2a**)

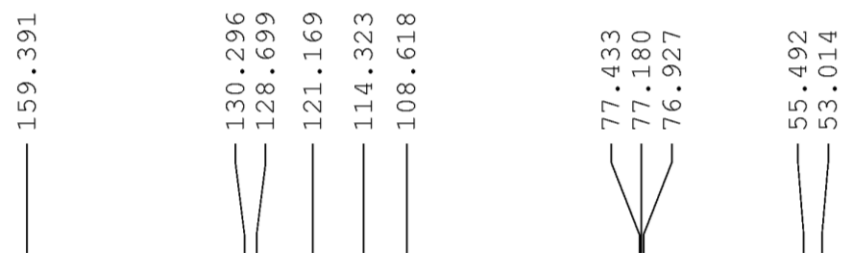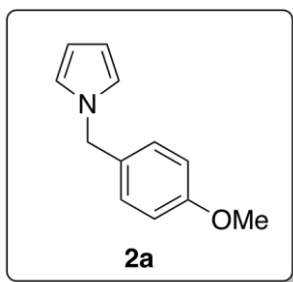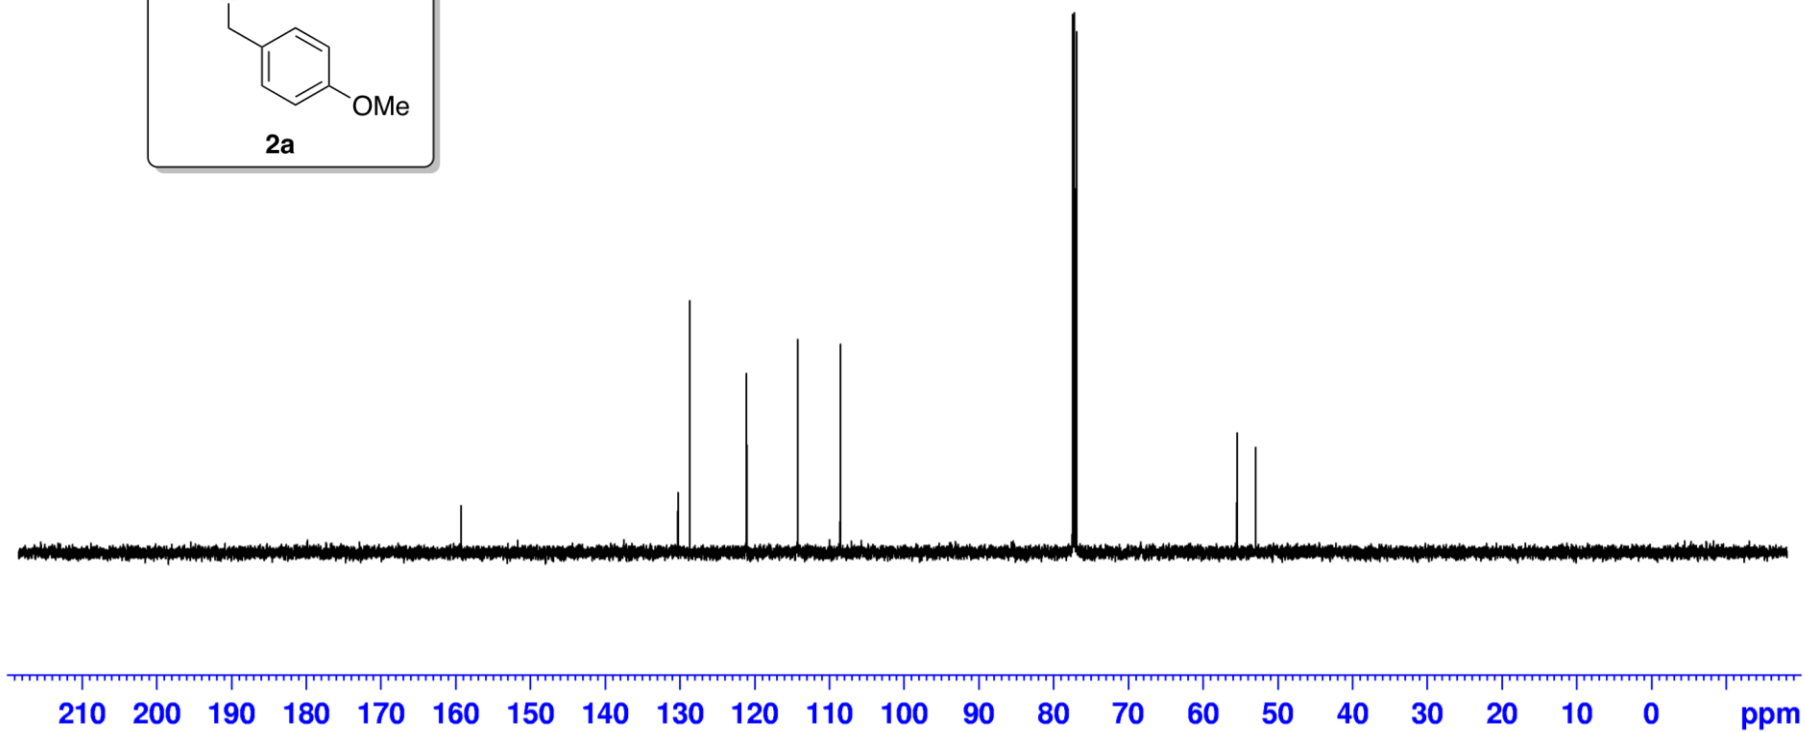

$^1\text{H}$  NMR ( $\text{CDCl}_3$ , 400 MHz) spectrum of 1-(2-methoxybenzyl)-1*H*-pyrrole (**2b**)

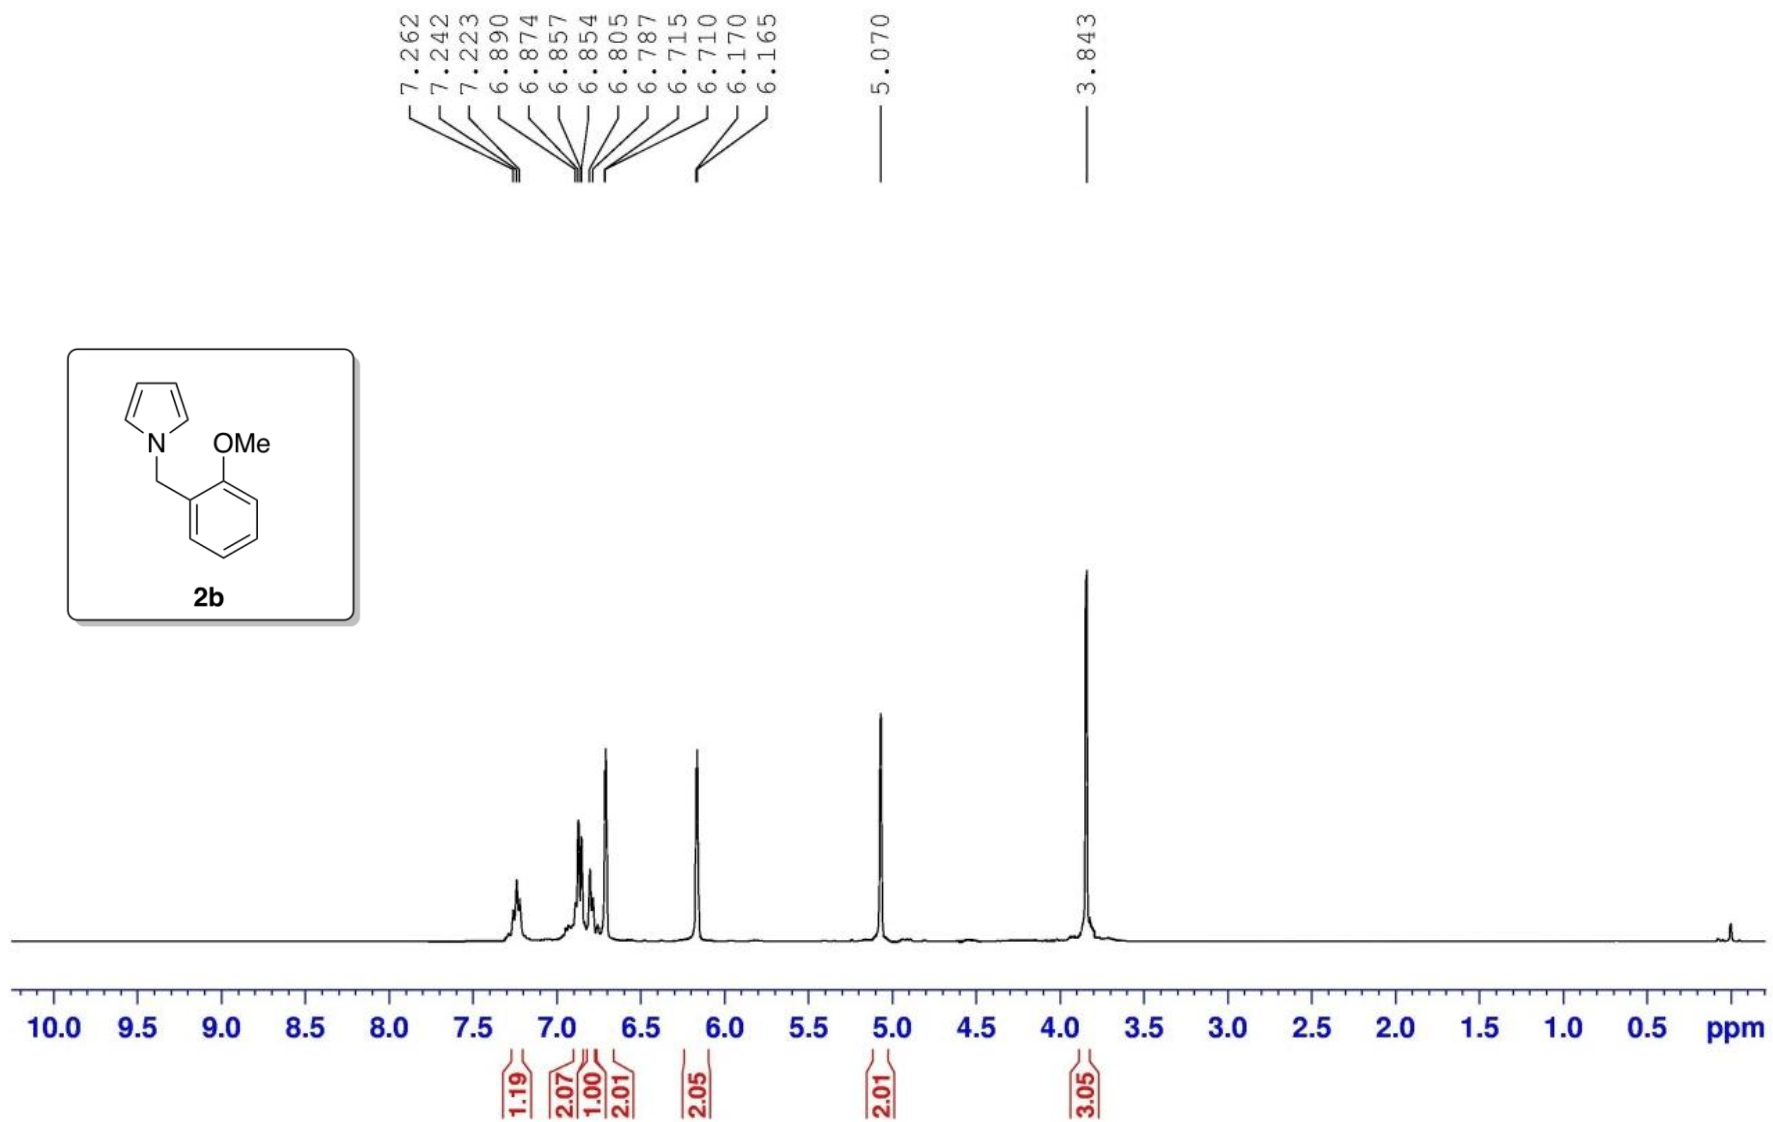



$^{13}\text{C}$  NMR ( $\text{CDCl}_3$ , 100 MHz) spectrum of 1-(2-methoxybenzyl)-1H-pyrrole (**2b**)

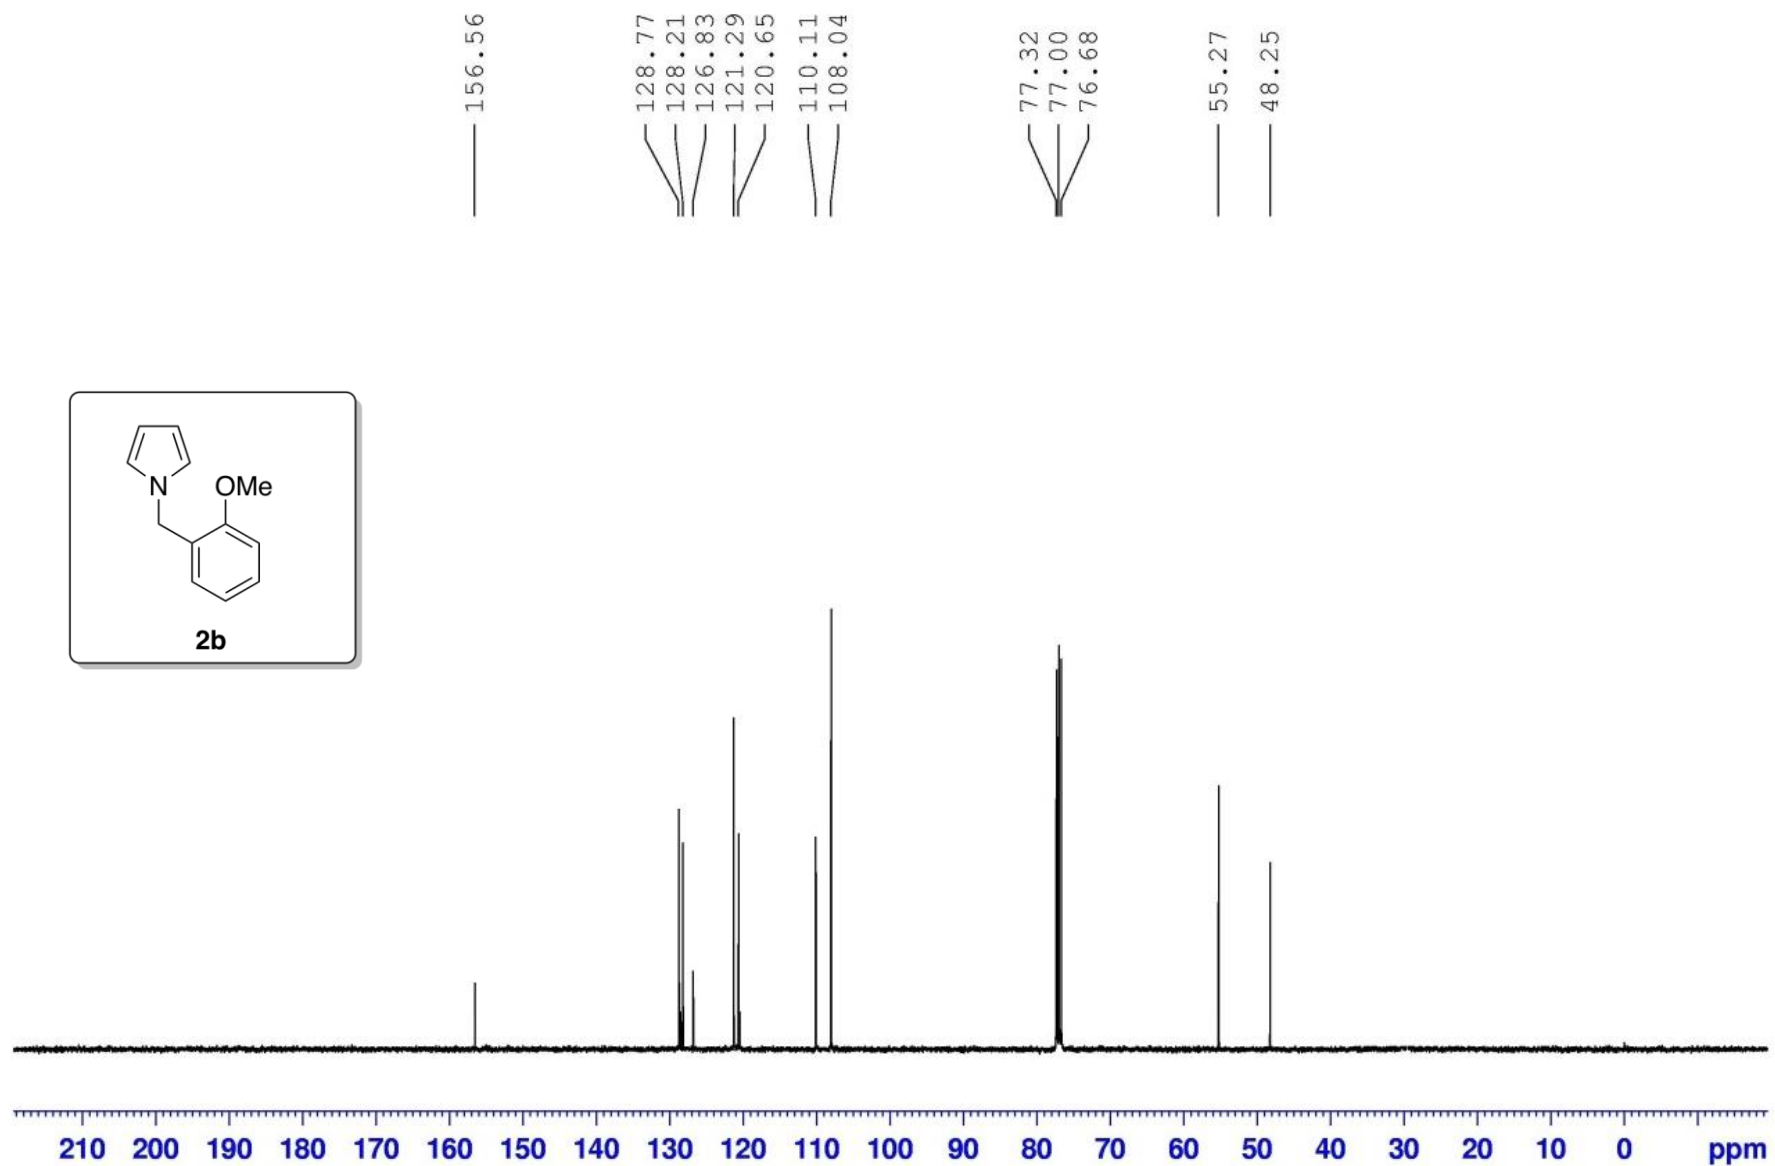

$^1\text{H}$  NMR ( $\text{CDCl}_3$ , 400 MHz) spectrum of methyl 1-(3-methoxybenzyl)-1*H*-pyrrole (**2c**)

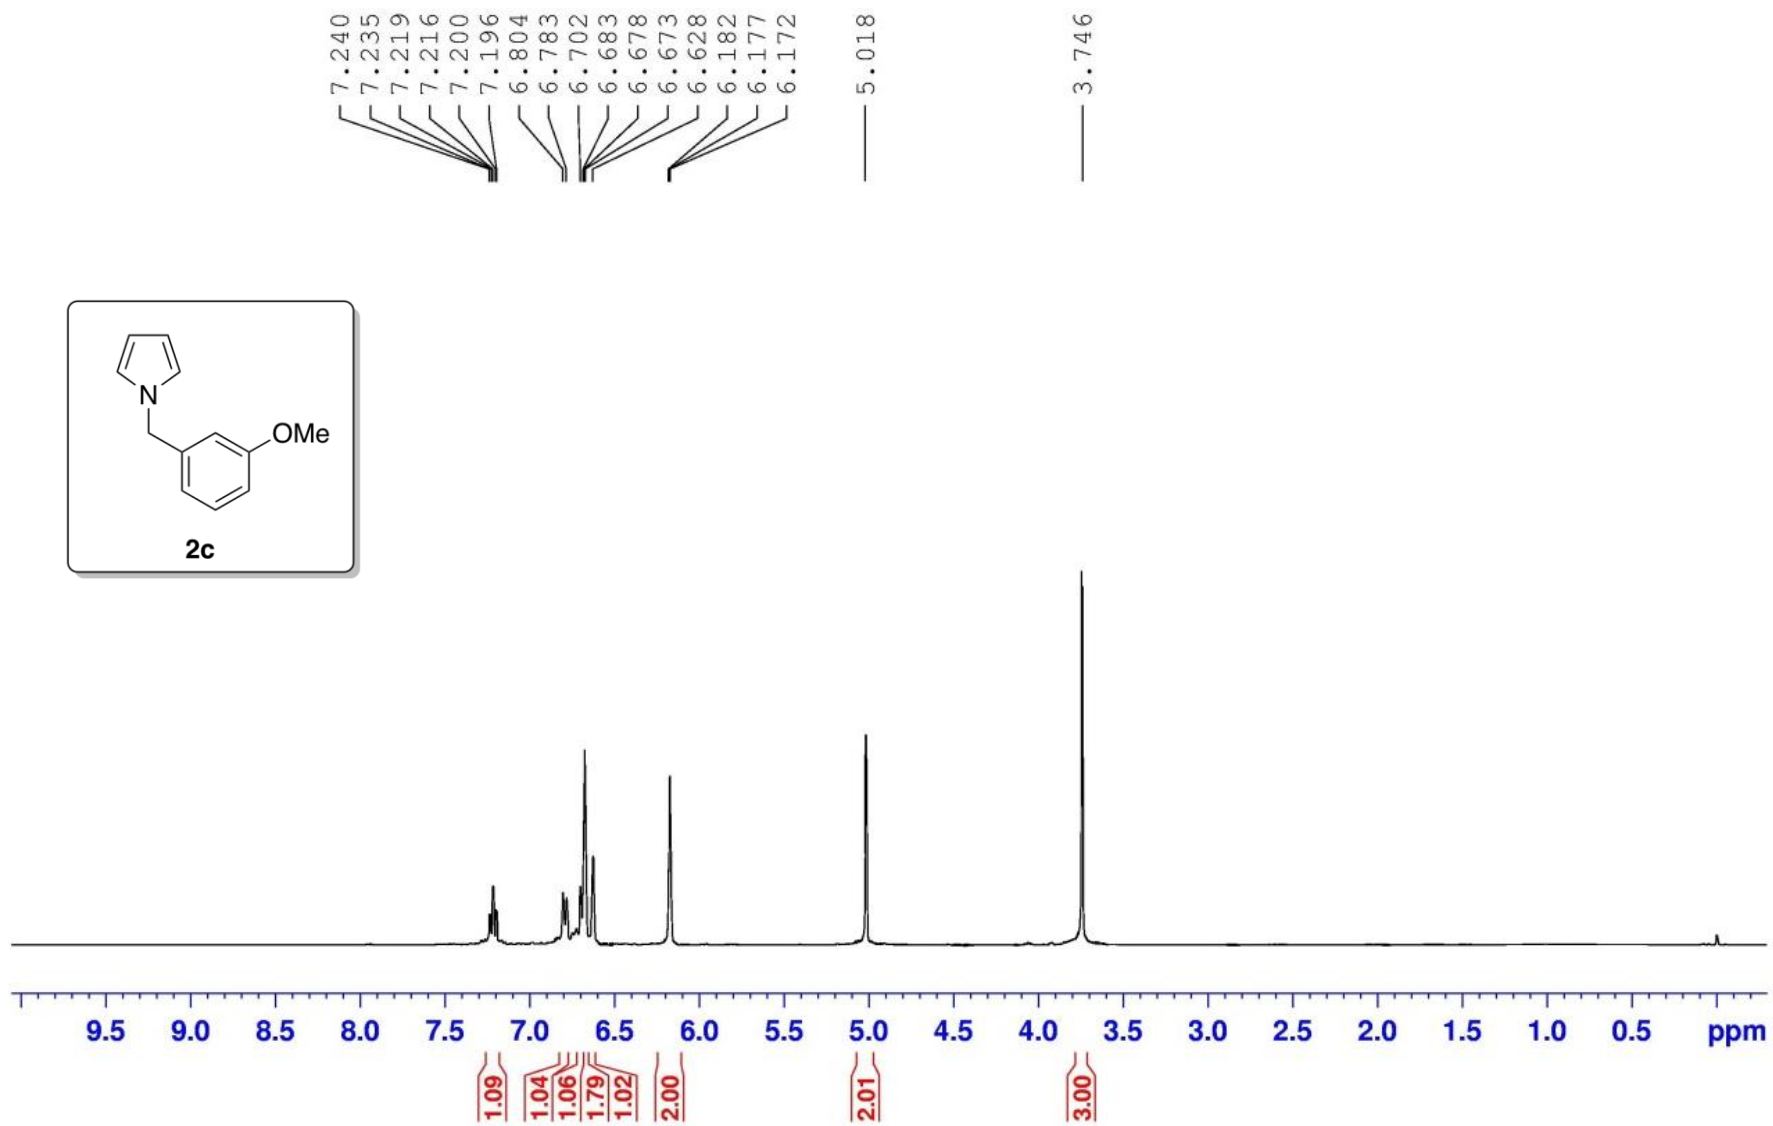

$^{13}\text{C}$  NMR ( $\text{CDCl}_3$ , 100 MHz) spectrum of methyl 1-(3-methoxybenzyl)-1*H*-pyrrole (**2c**)

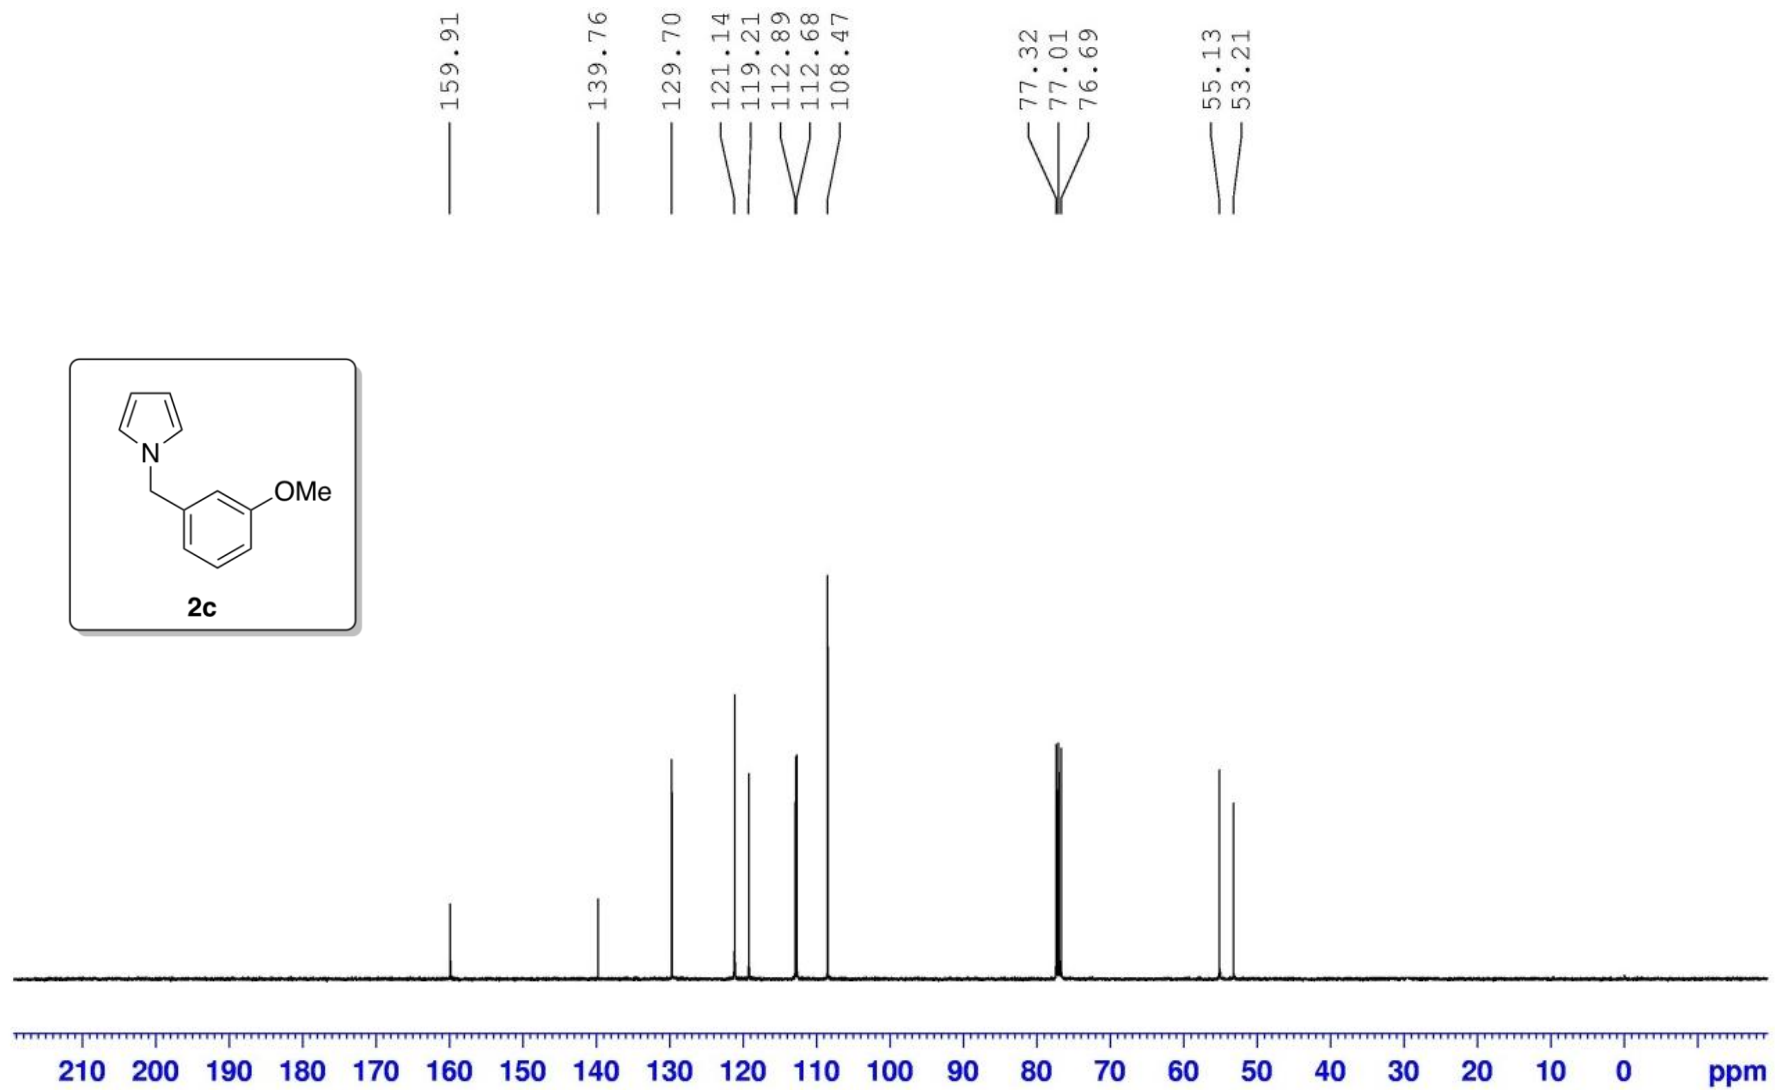

$^1\text{H}$  NMR ( $\text{CDCl}_3$ , 400 MHz) spectrum of 1-(3,5-dimethoxybenzyl)-1*H*-pyrrole (**2d**)

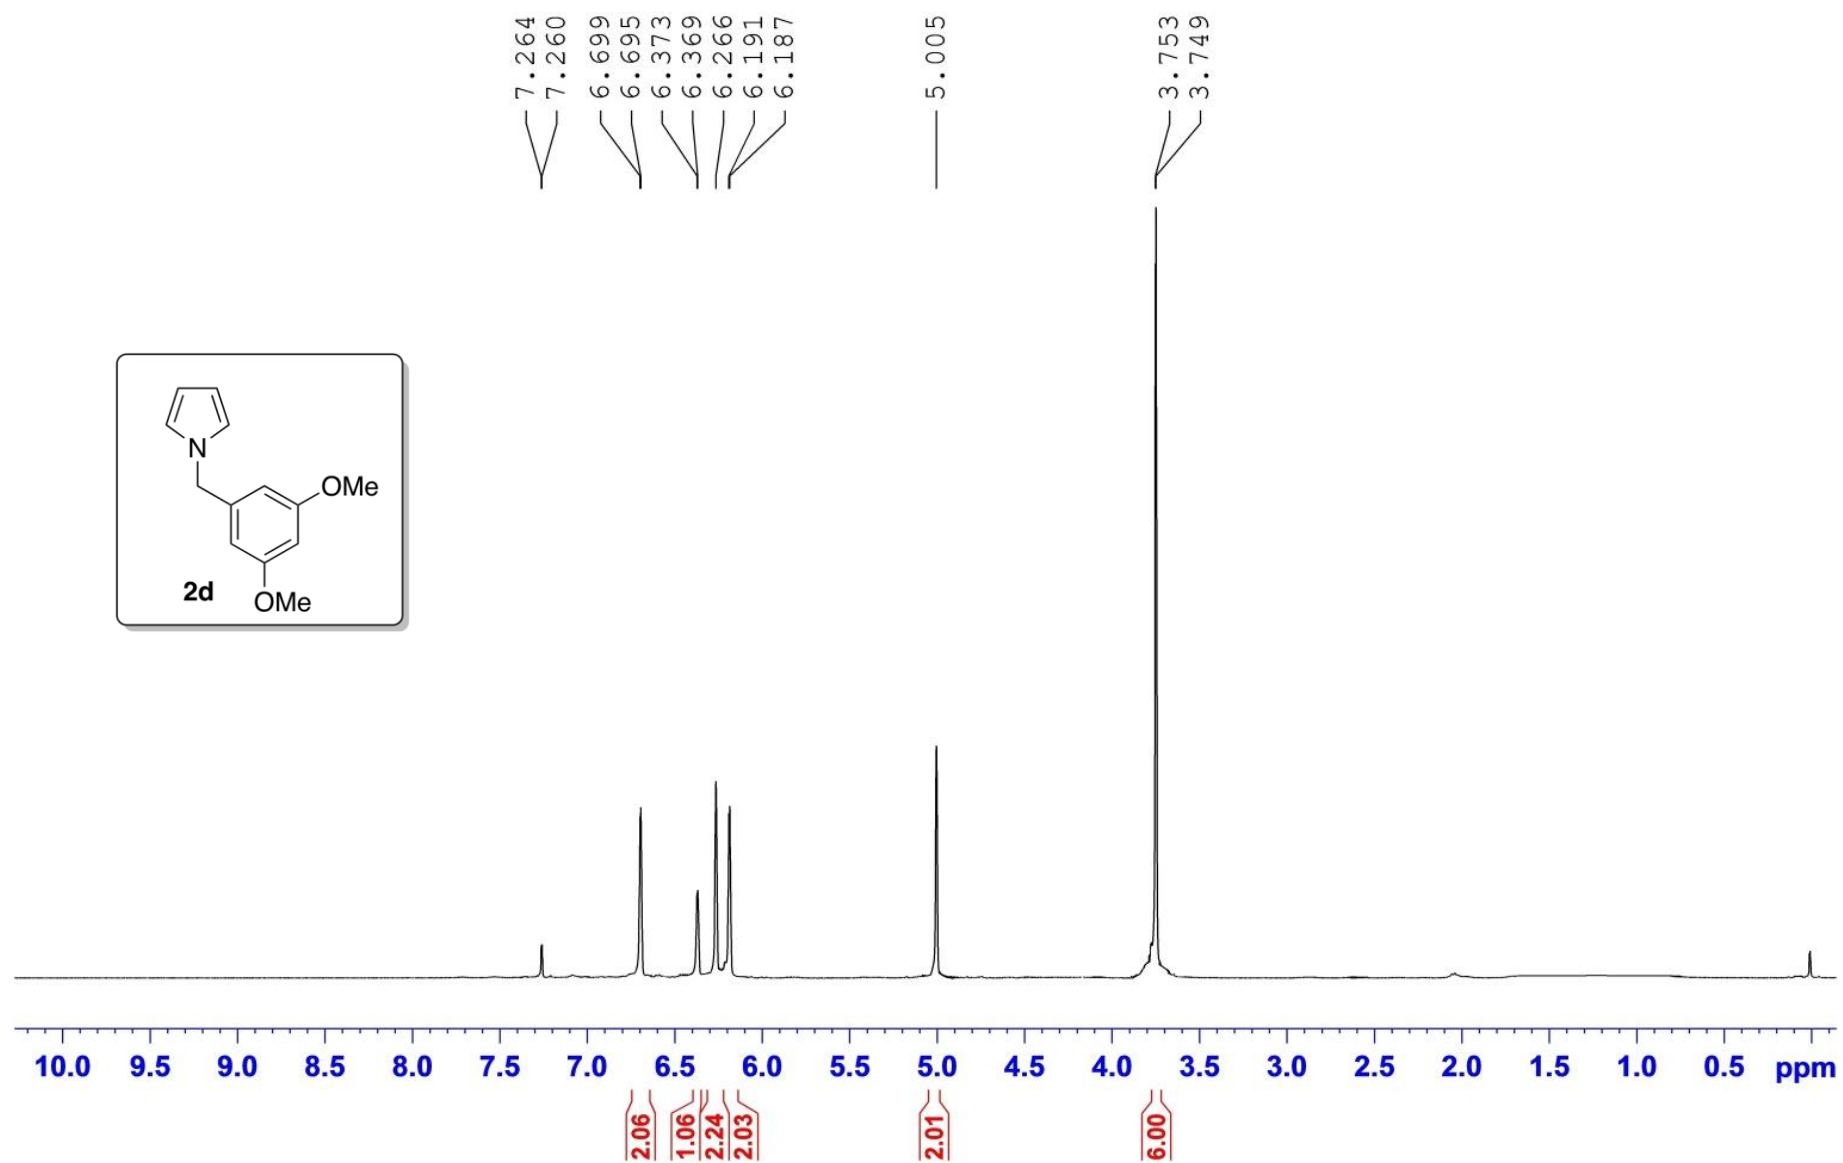

$^{13}\text{C}$  NMR ( $\text{CDCl}_3$ , 100 MHz) spectrum of 1-(3,5-dimethoxybenzyl)-1H-pyrrole (**2d**)

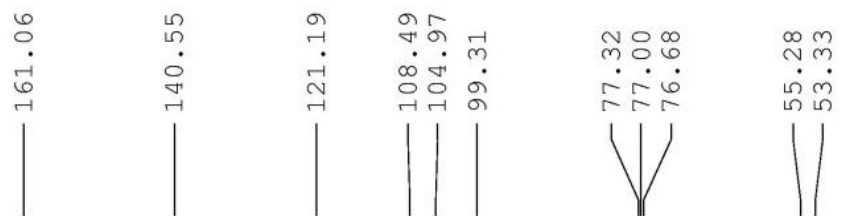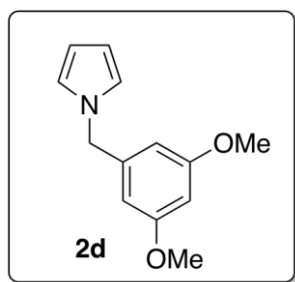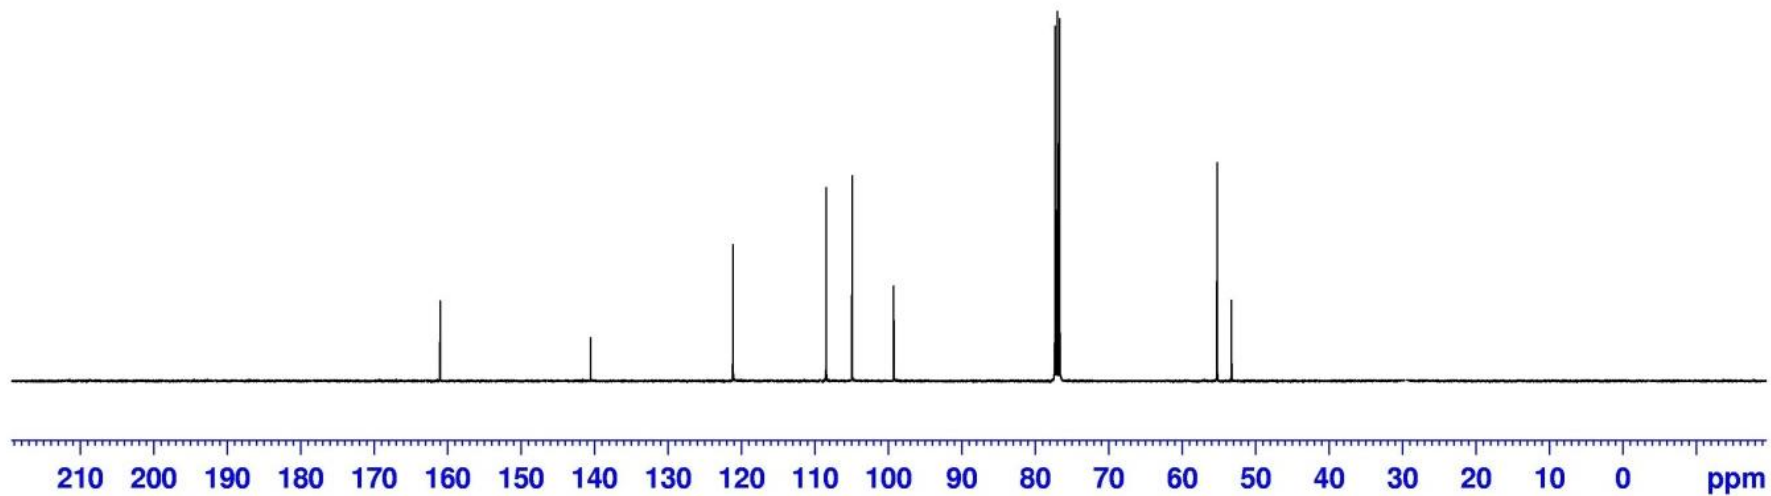

$^1\text{H}$  NMR ( $\text{CDCl}_3$ , 400 MHz) spectrum of 1-(4-methylbenzyl)-1*H*-pyrrole (**2e**)

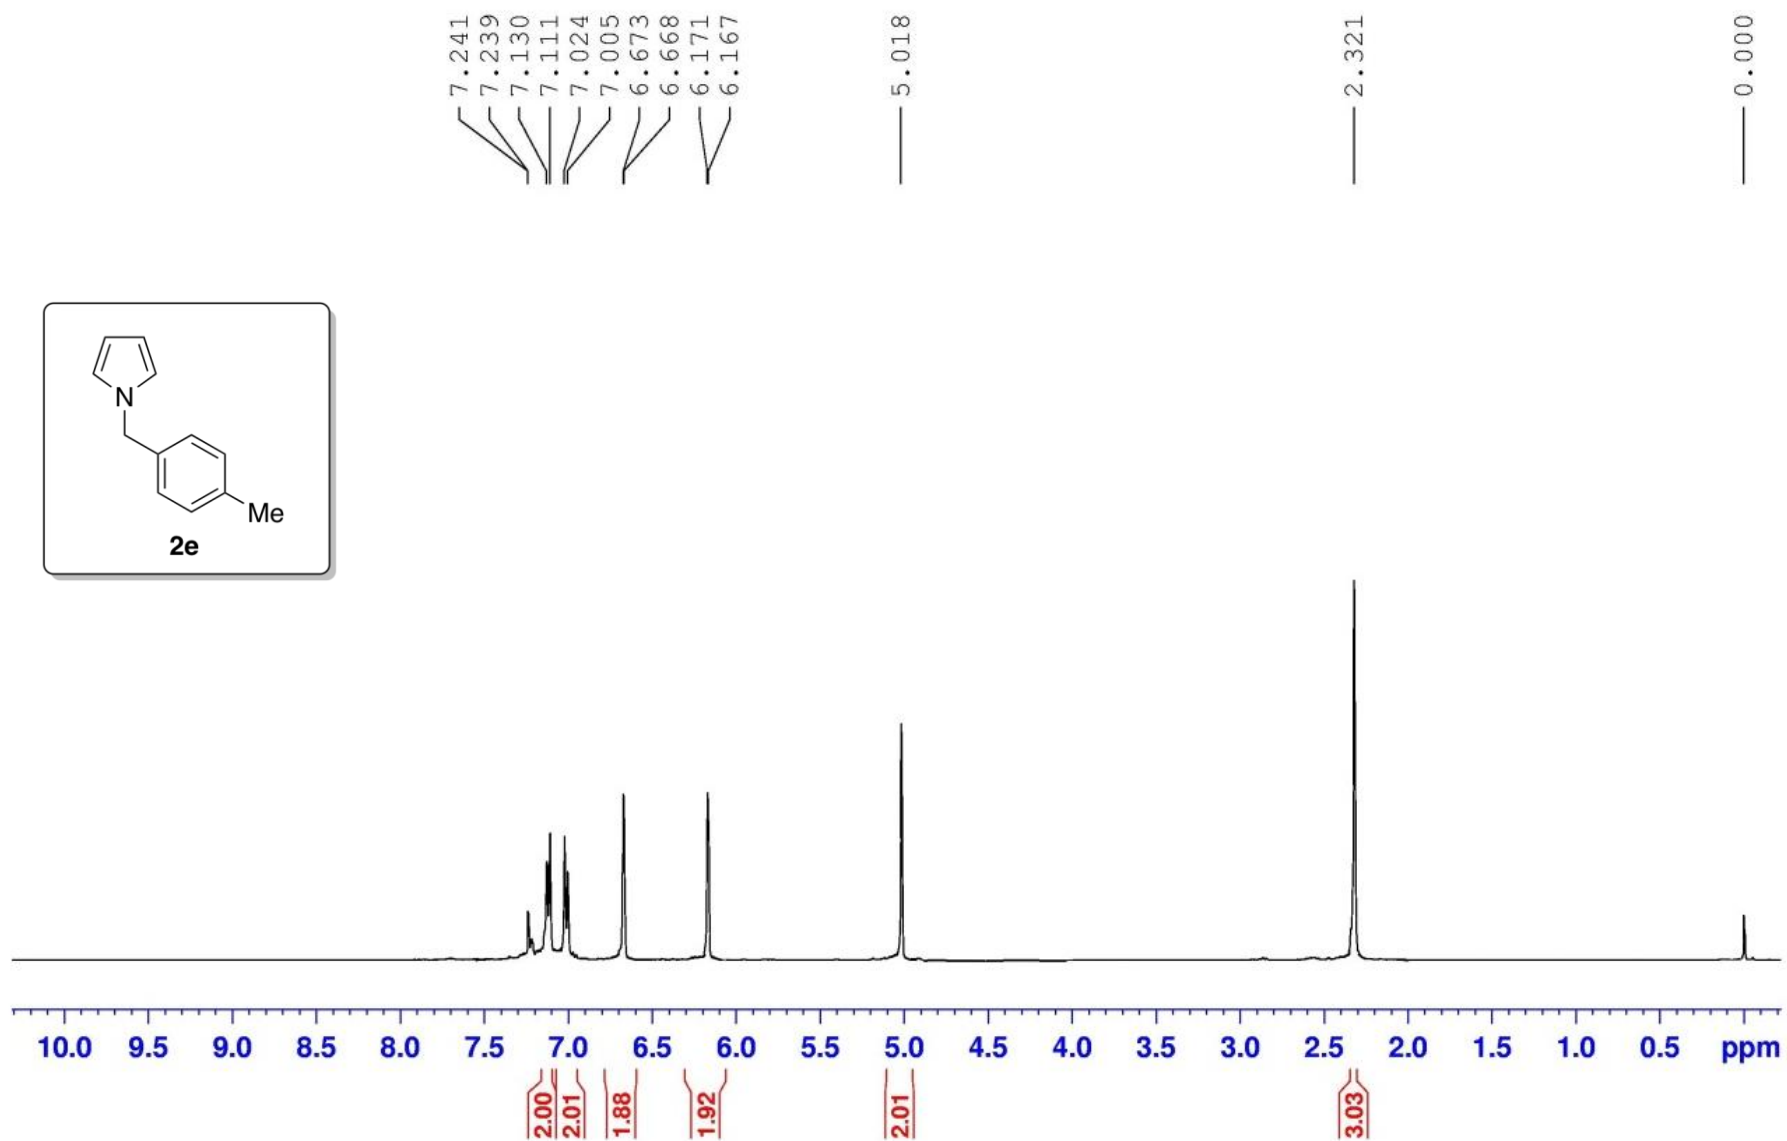

$^{13}\text{C}$  NMR ( $\text{CDCl}_3$ , 100 MHz) spectrum of 1-(4-methylbenzyl)-1H-pyrrole (**2e**)

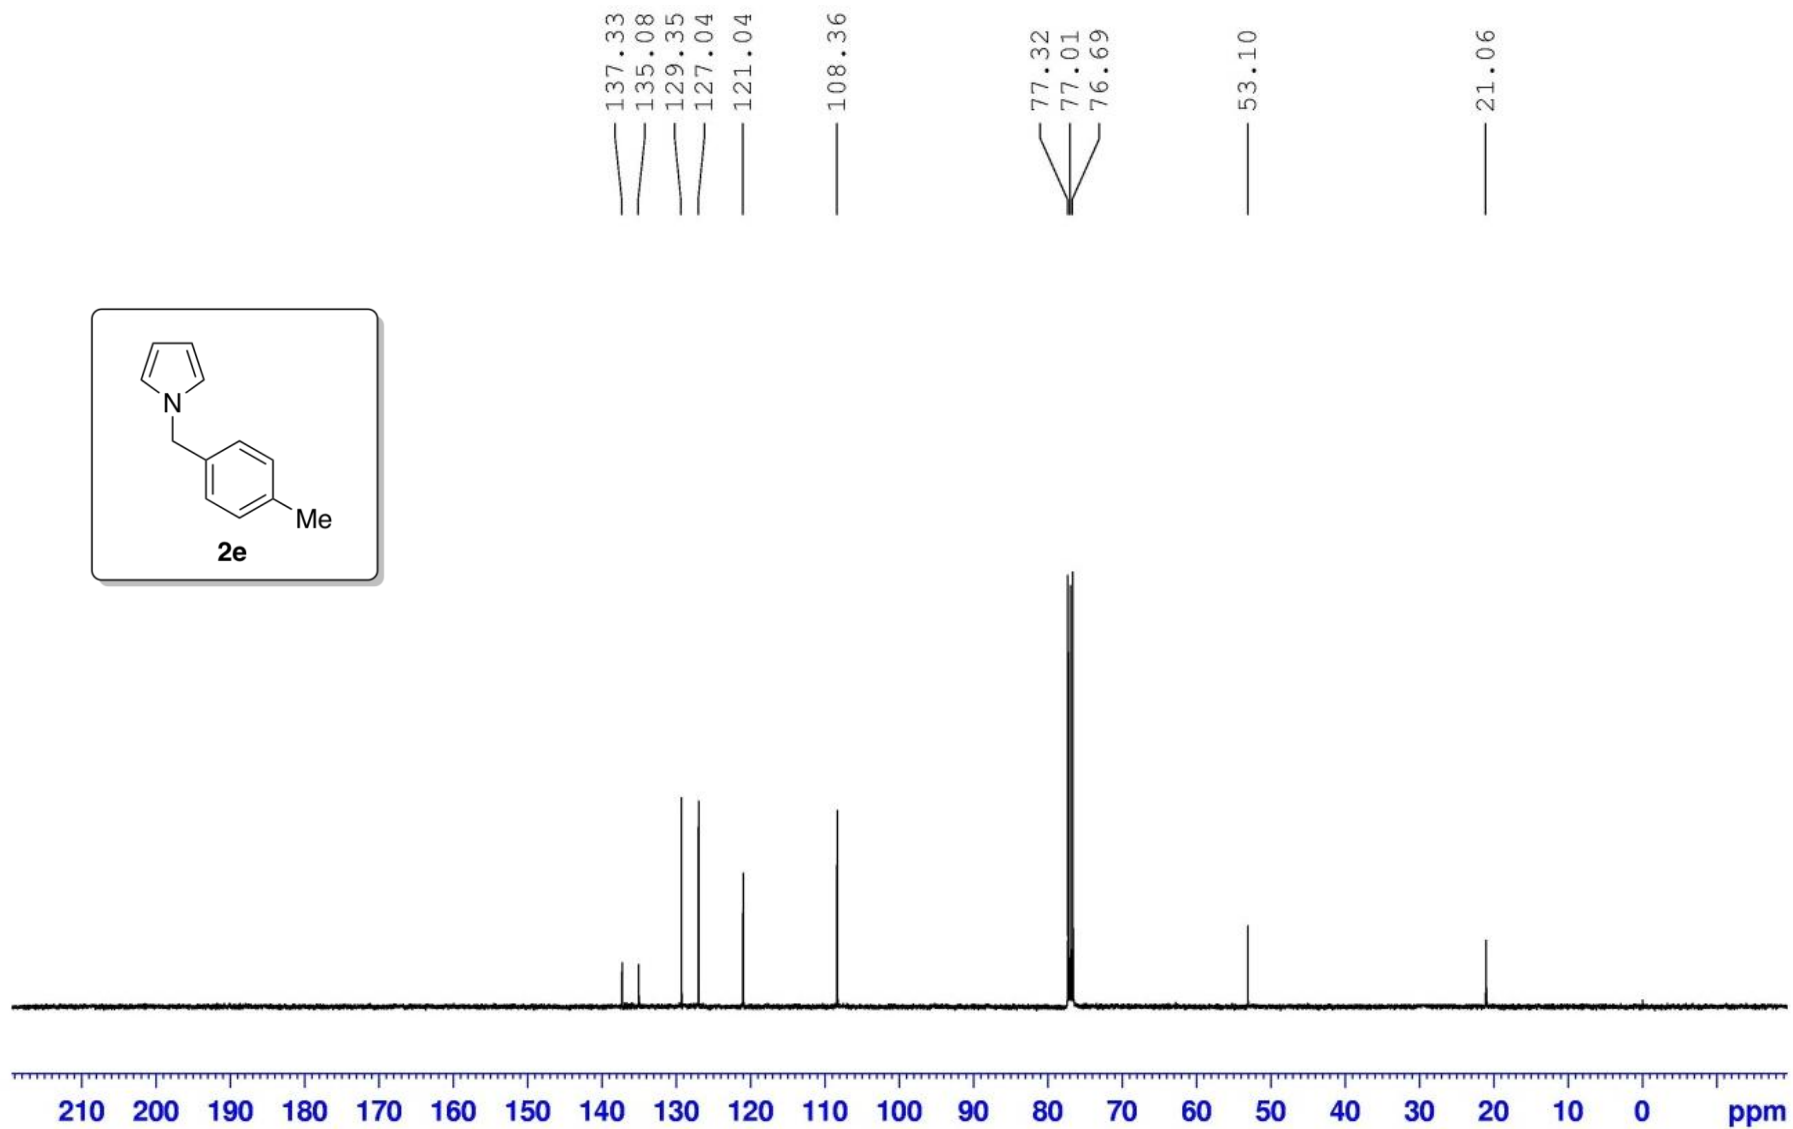

$^1\text{H}$  NMR ( $\text{CDCl}_3$ , 400 MHz) spectrum of 1-(3-methylbenzyl)-1*H*-pyrrole (**2f**)

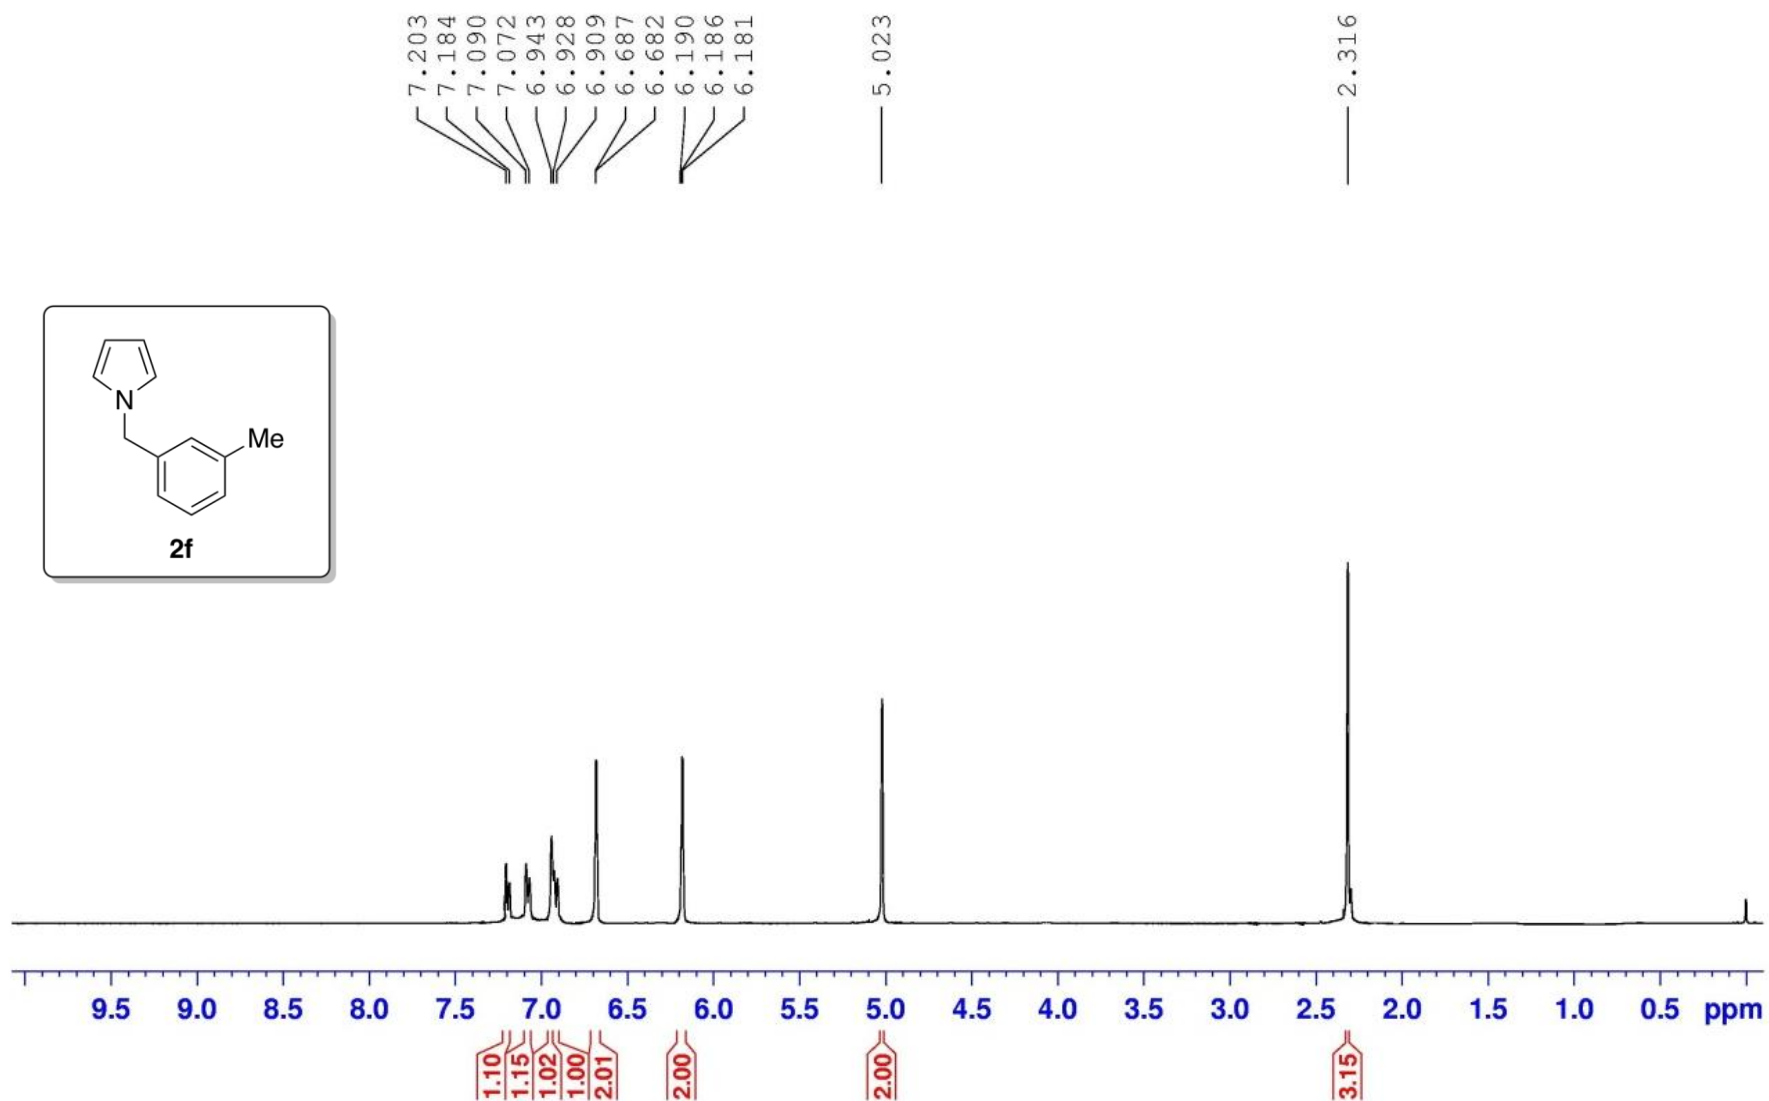



$^{13}\text{C}$  NMR ( $\text{CDCl}_3$ , 100 MHz) spectrum of 1-(3-methylbenzyl)-1*H*-pyrrole (**2f**)

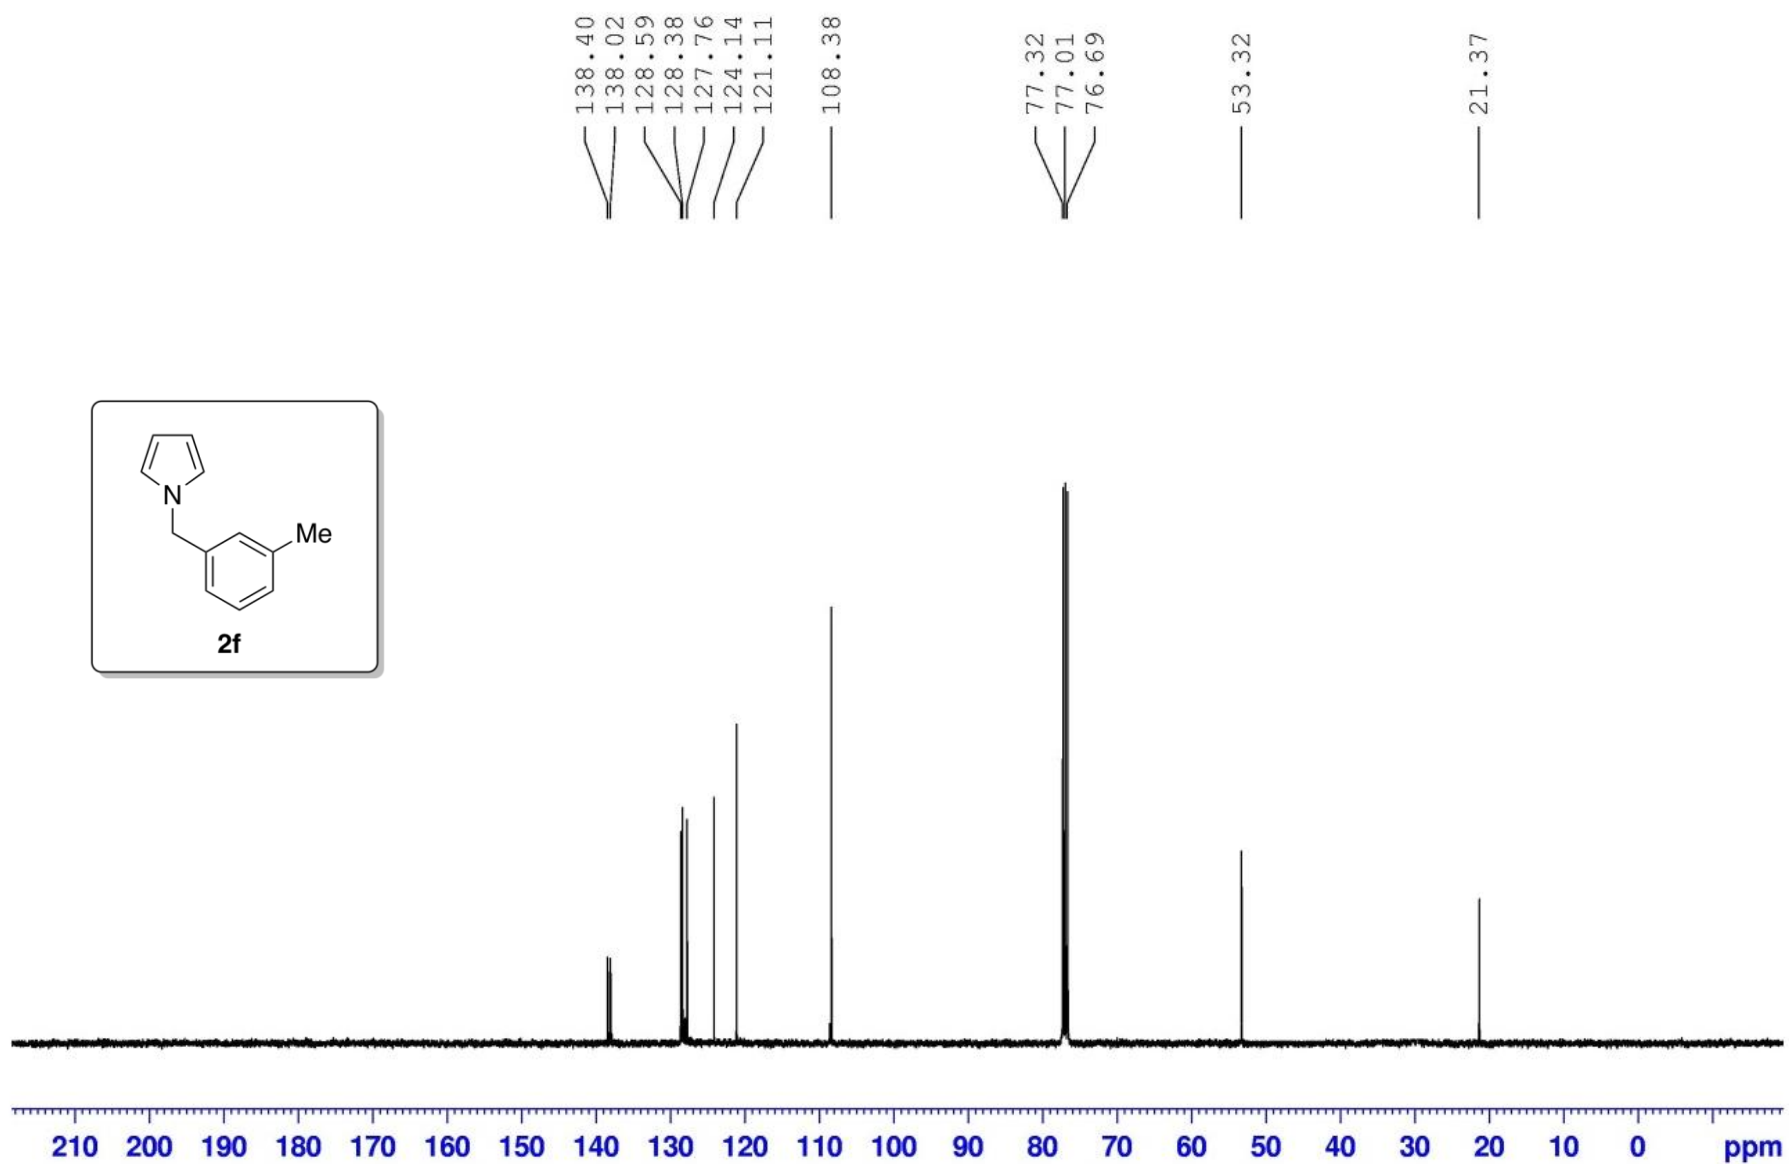

$^1\text{H}$  NMR ( $\text{CDCl}_3$ , 400 MHz) spectrum of 1-(2,6-dimethylbenzyl)-1H-pyrrole (**2g**)

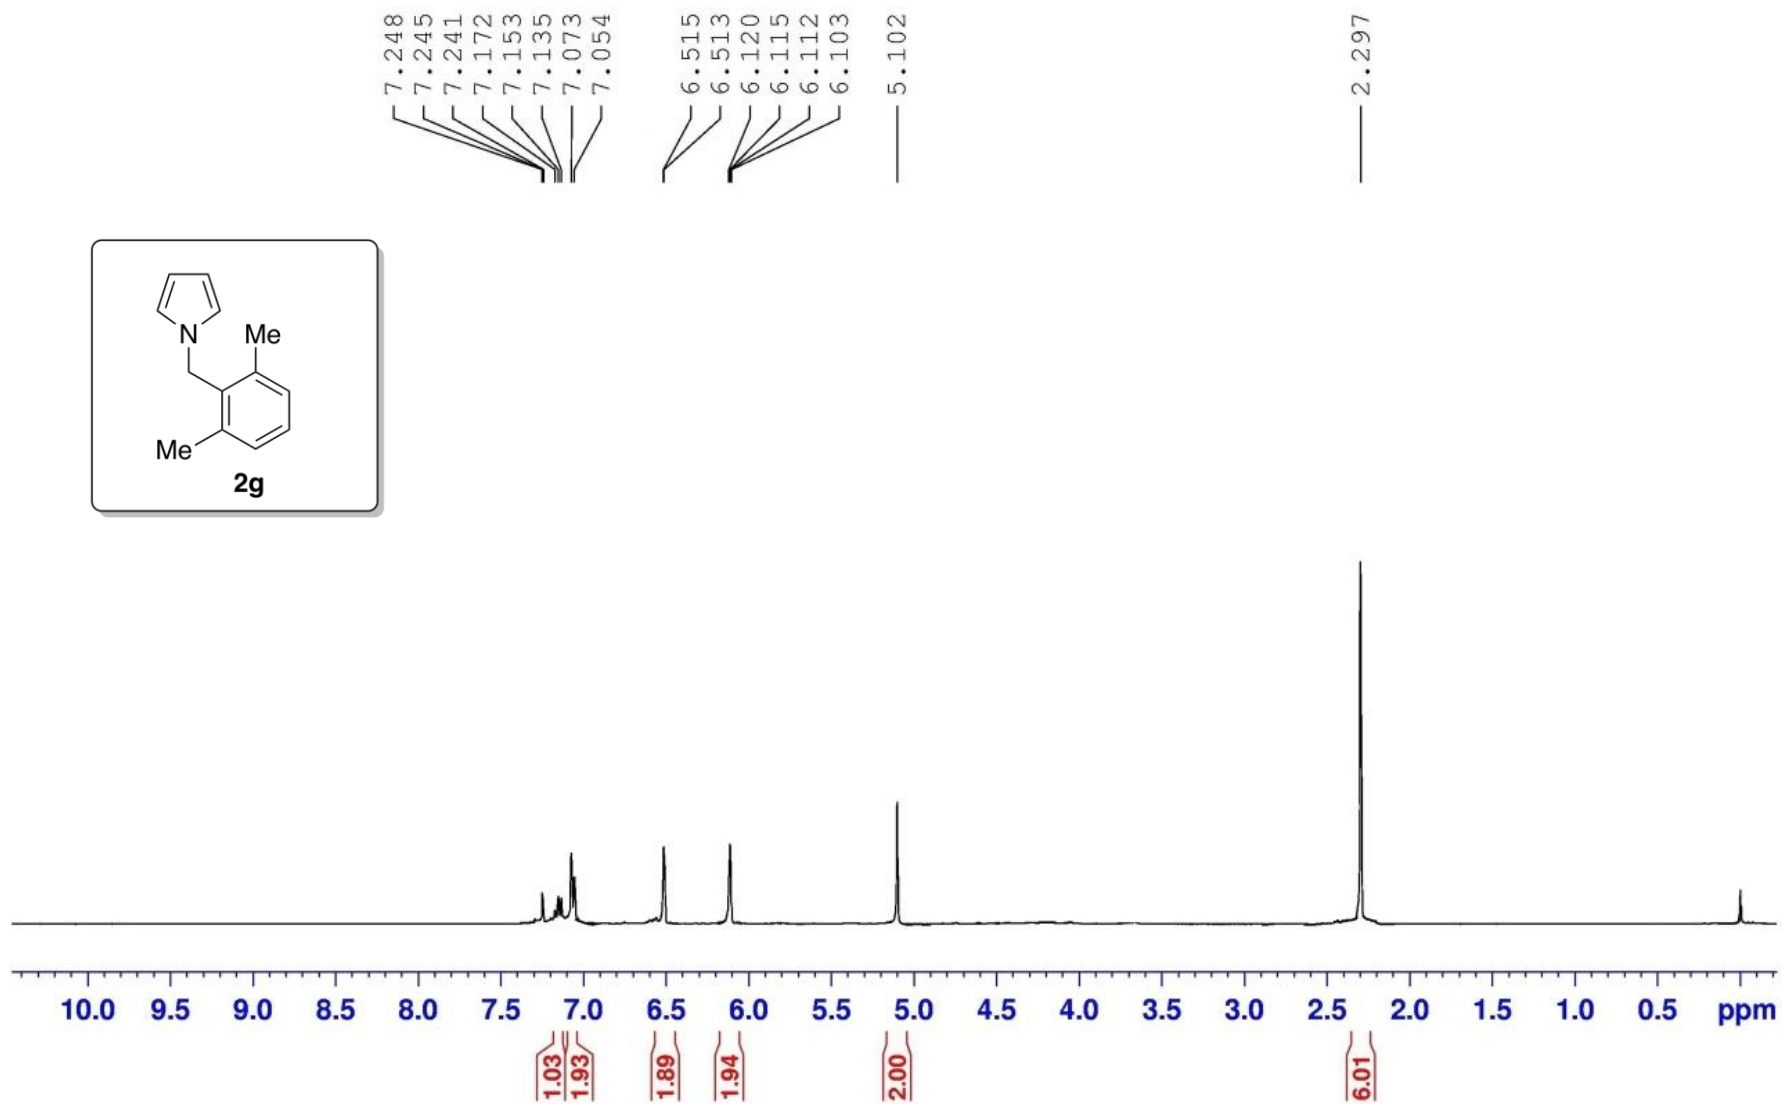

$^{13}\text{C}$  NMR ( $\text{CDCl}_3$ , 100 MHz) spectrum of 1-(2,6-dimethylbenzyl)-1H-pyrrole (**2g**)

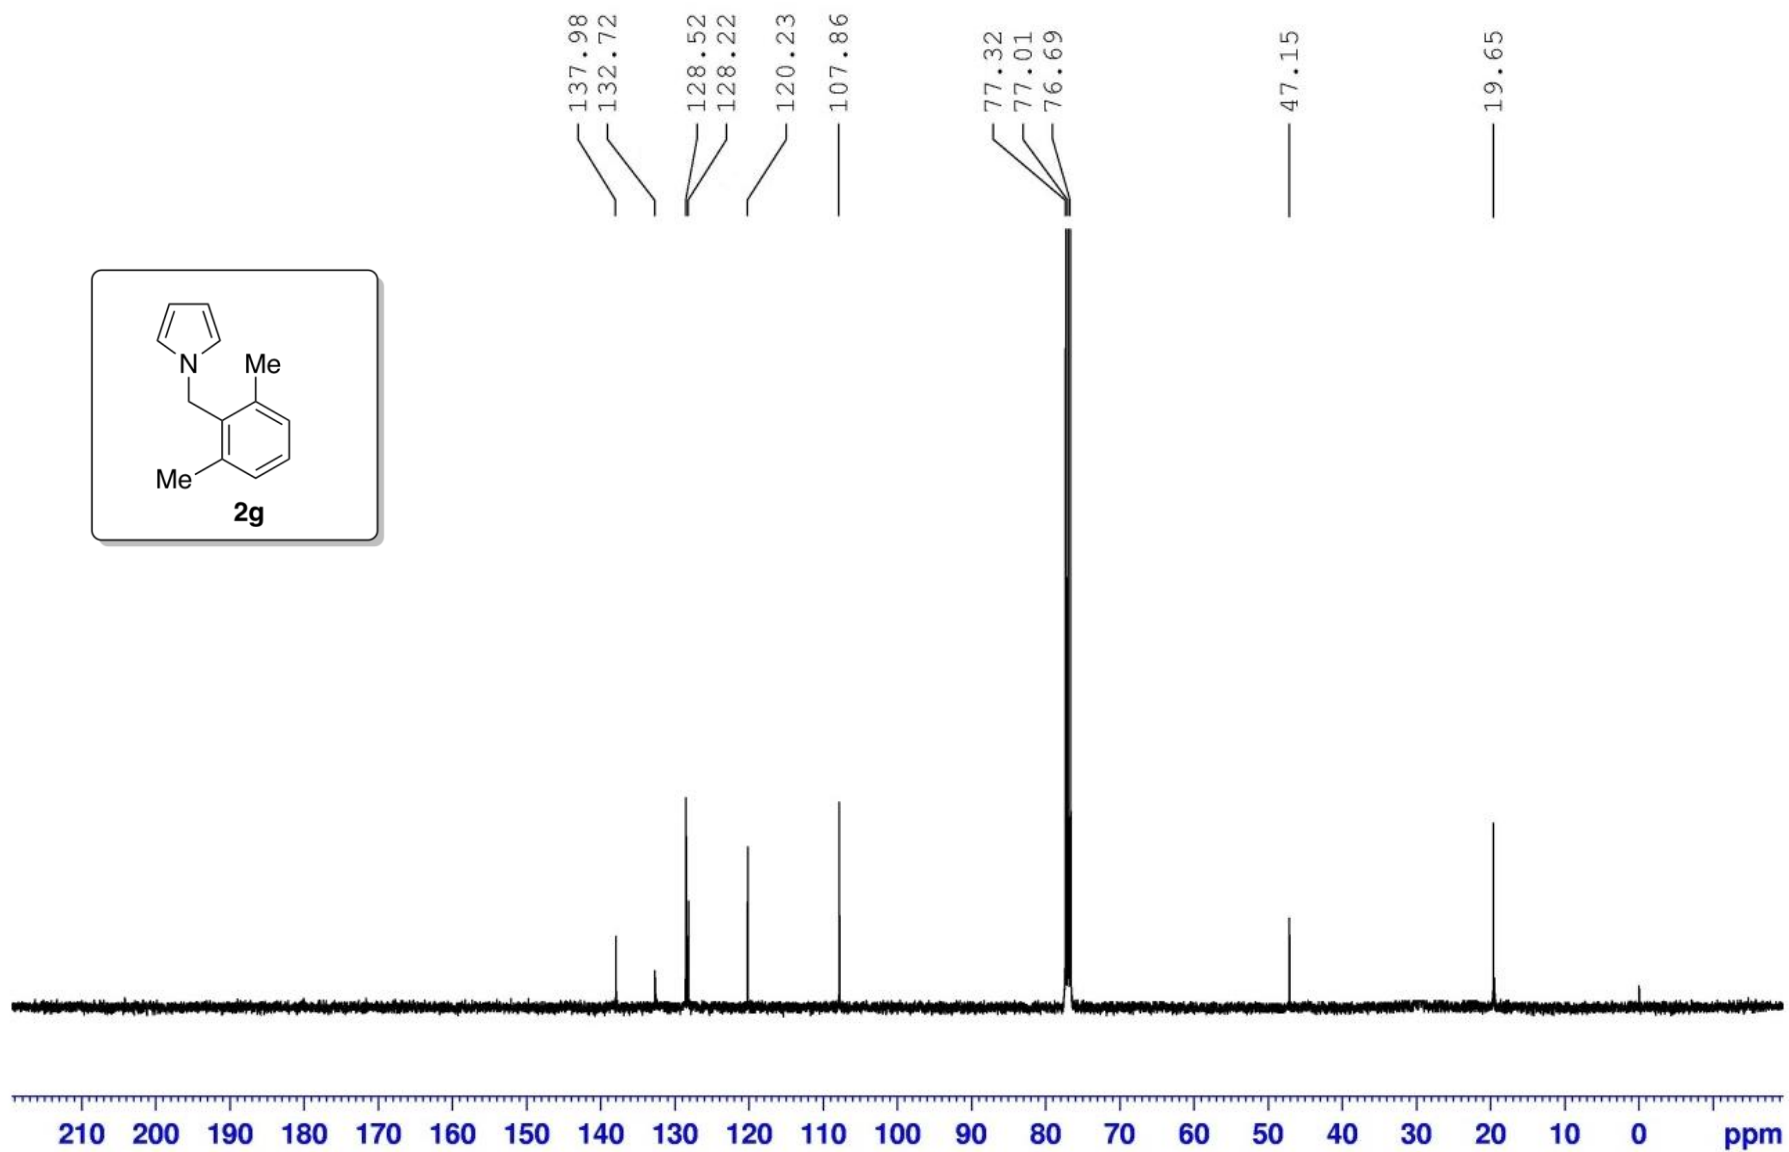

$^1\text{H}$  NMR ( $\text{CDCl}_3$ , 400 MHz) spectrum of methyl 4-((1*H*-pyrrol-1-yl)methyl)benzoate (**2h**)

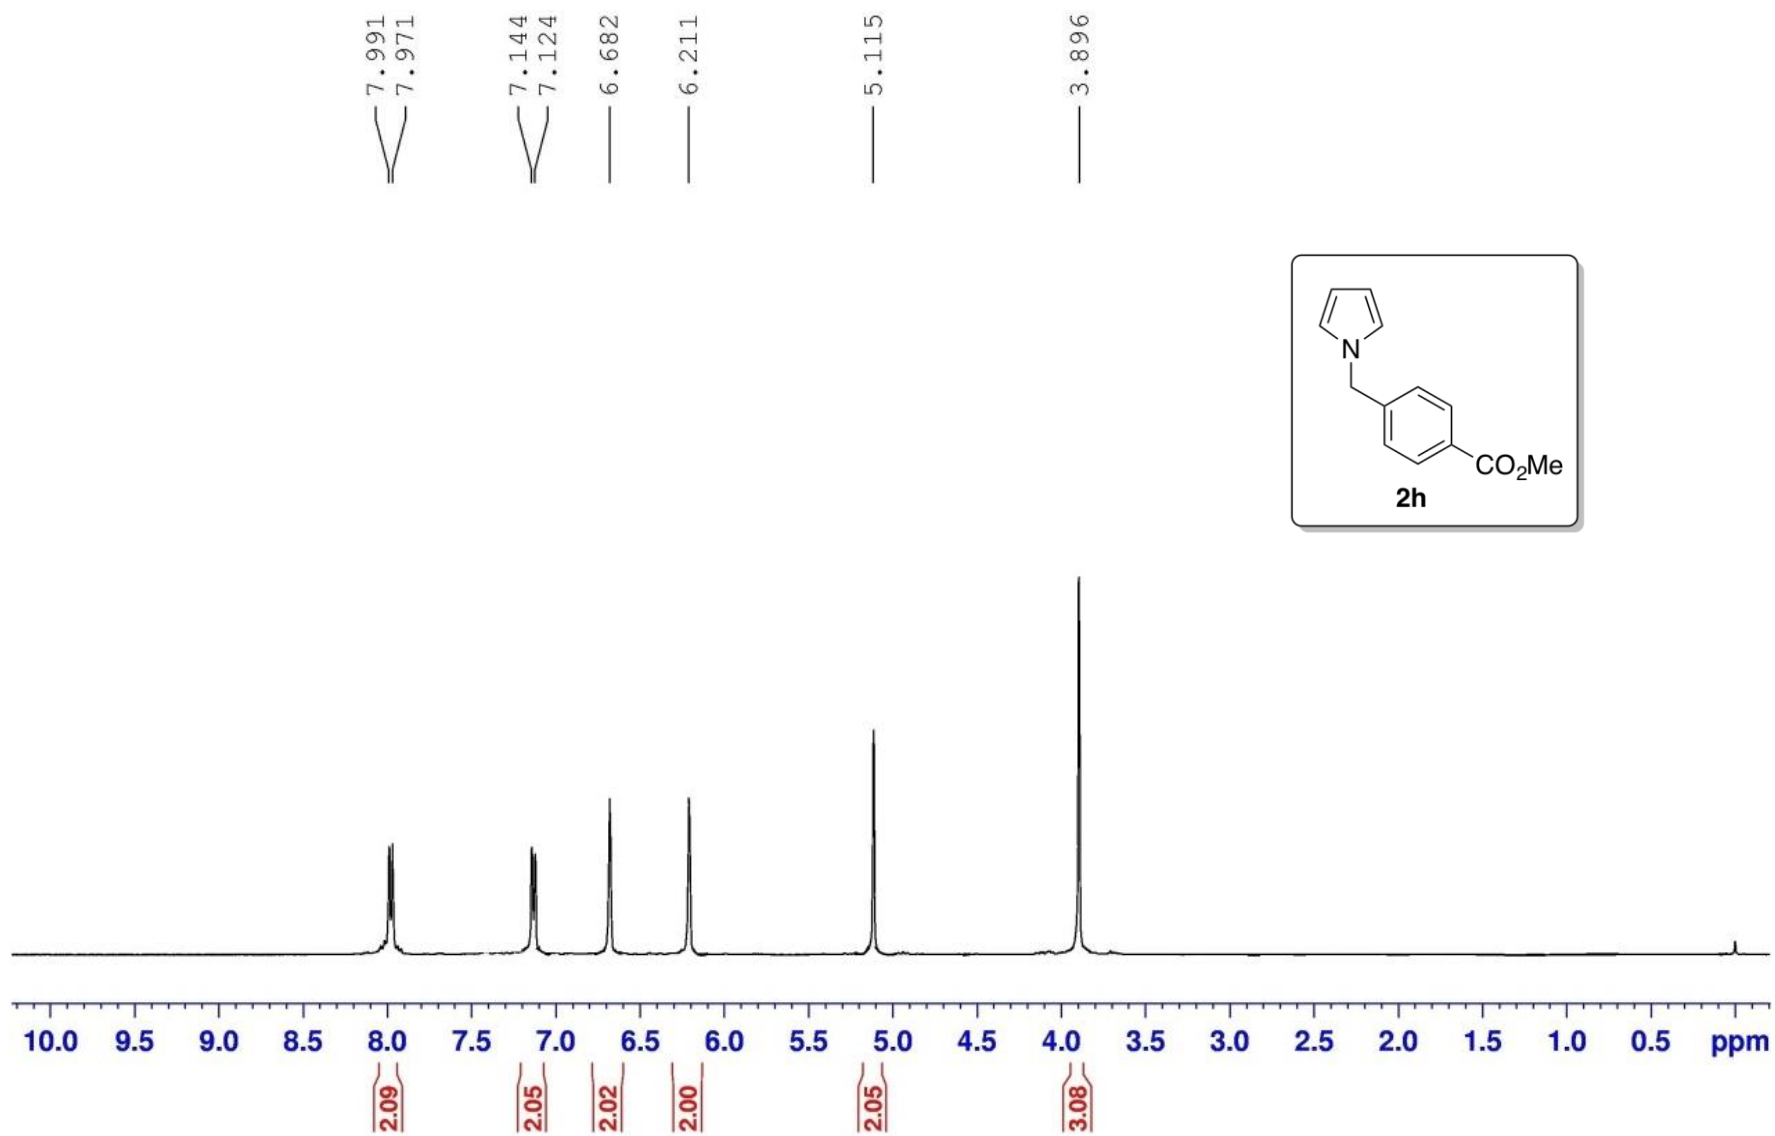

$^{13}\text{C}$  NMR ( $\text{CDCl}_3$ , 100 MHz) spectrum of methyl 4-((1*H*-pyrrol-1-yl)methyl)benzoate (**2h**)

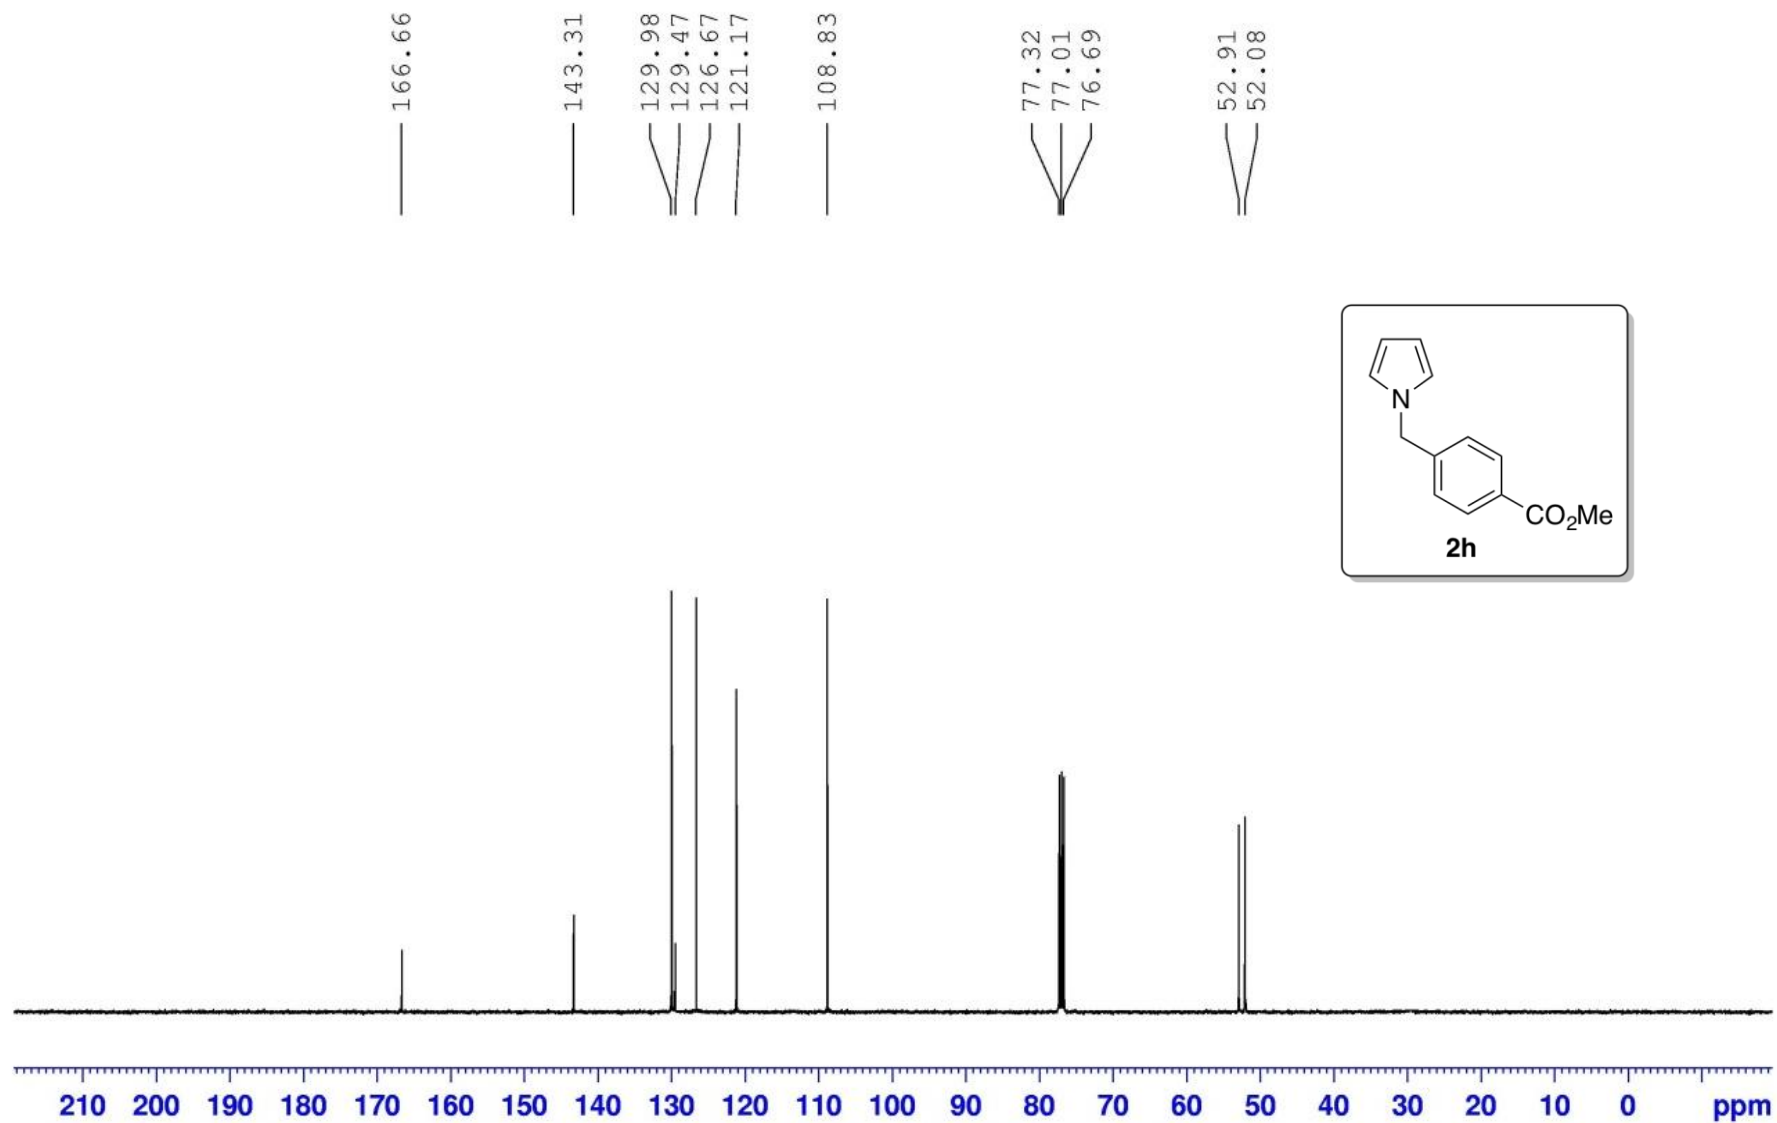

$^1\text{H}$  NMR ( $\text{CDCl}_3$ , 400 MHz) spectrum of methyl 3-((1*H*-pyrrol-1-yl)methyl)benzoate (**2i**)

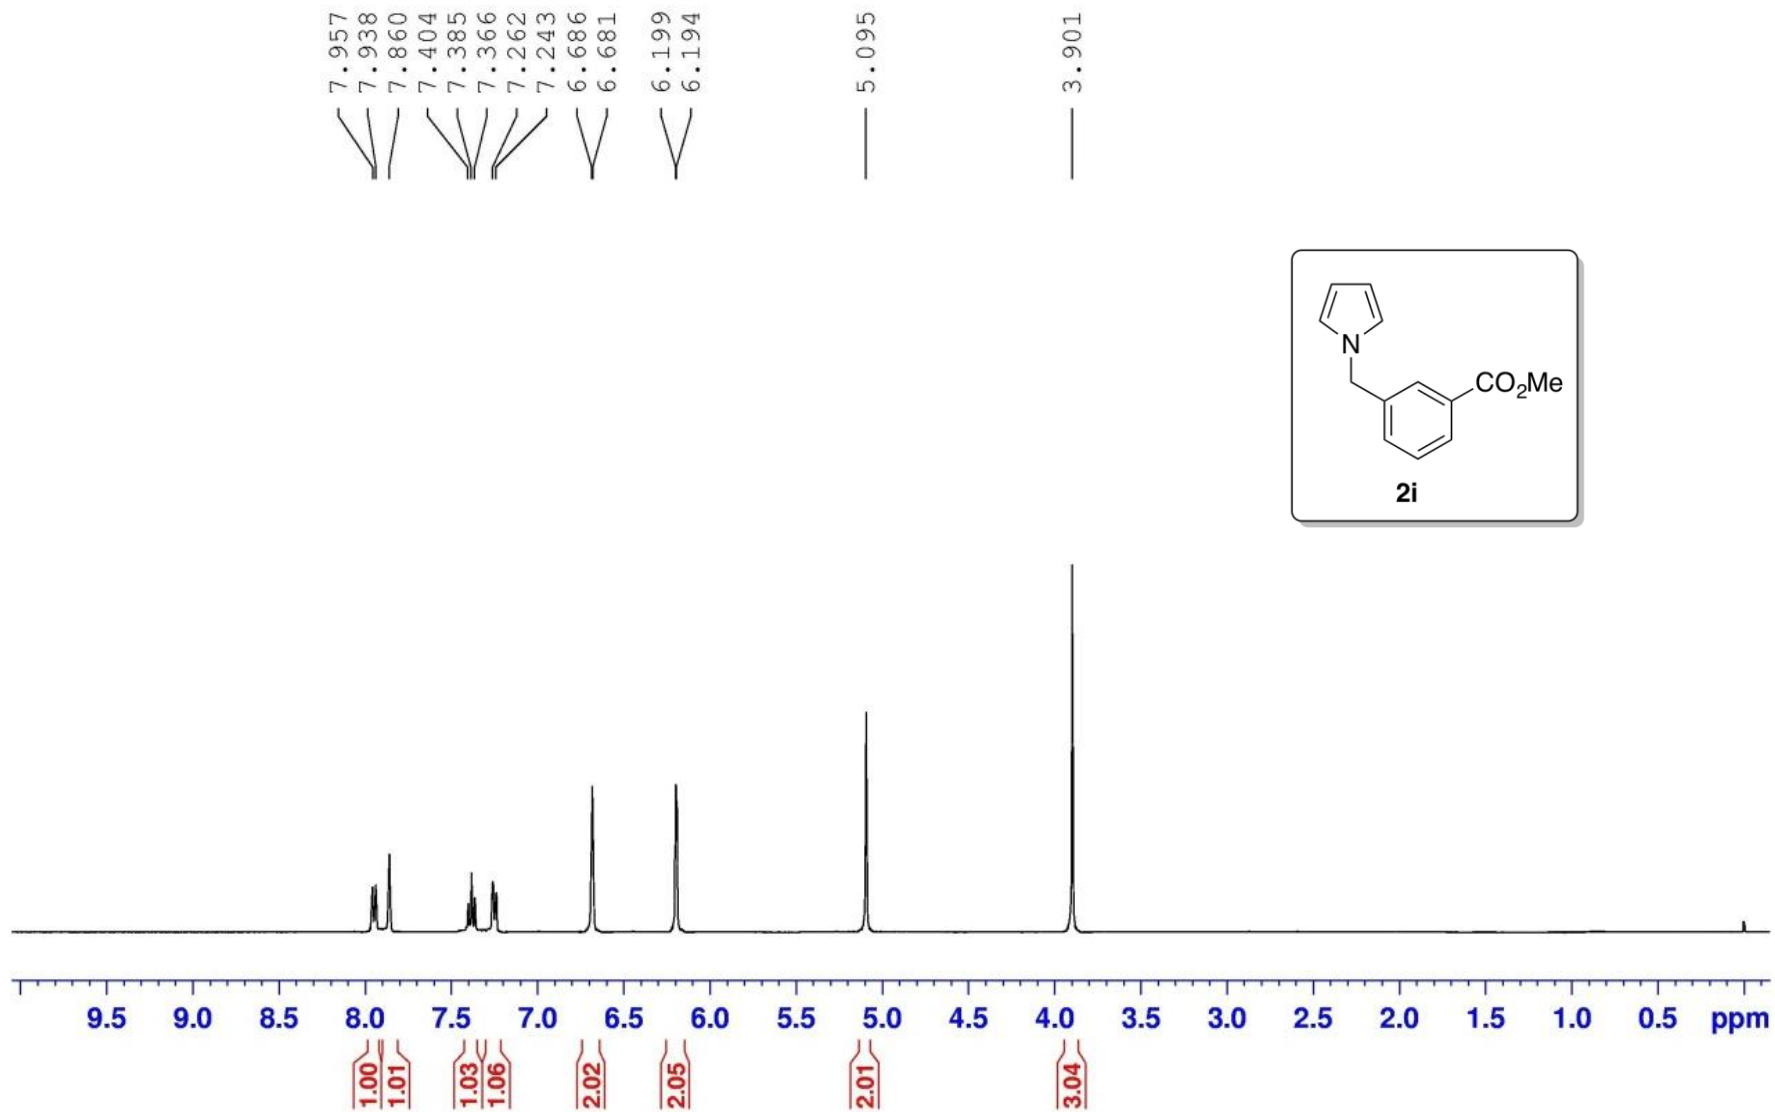

$^{13}\text{C}$  NMR ( $\text{CDCl}_3$ , 100 MHz) spectrum of methyl 3-((1*H*-pyrrol-1-yl)methyl)benzoate (**2i**)

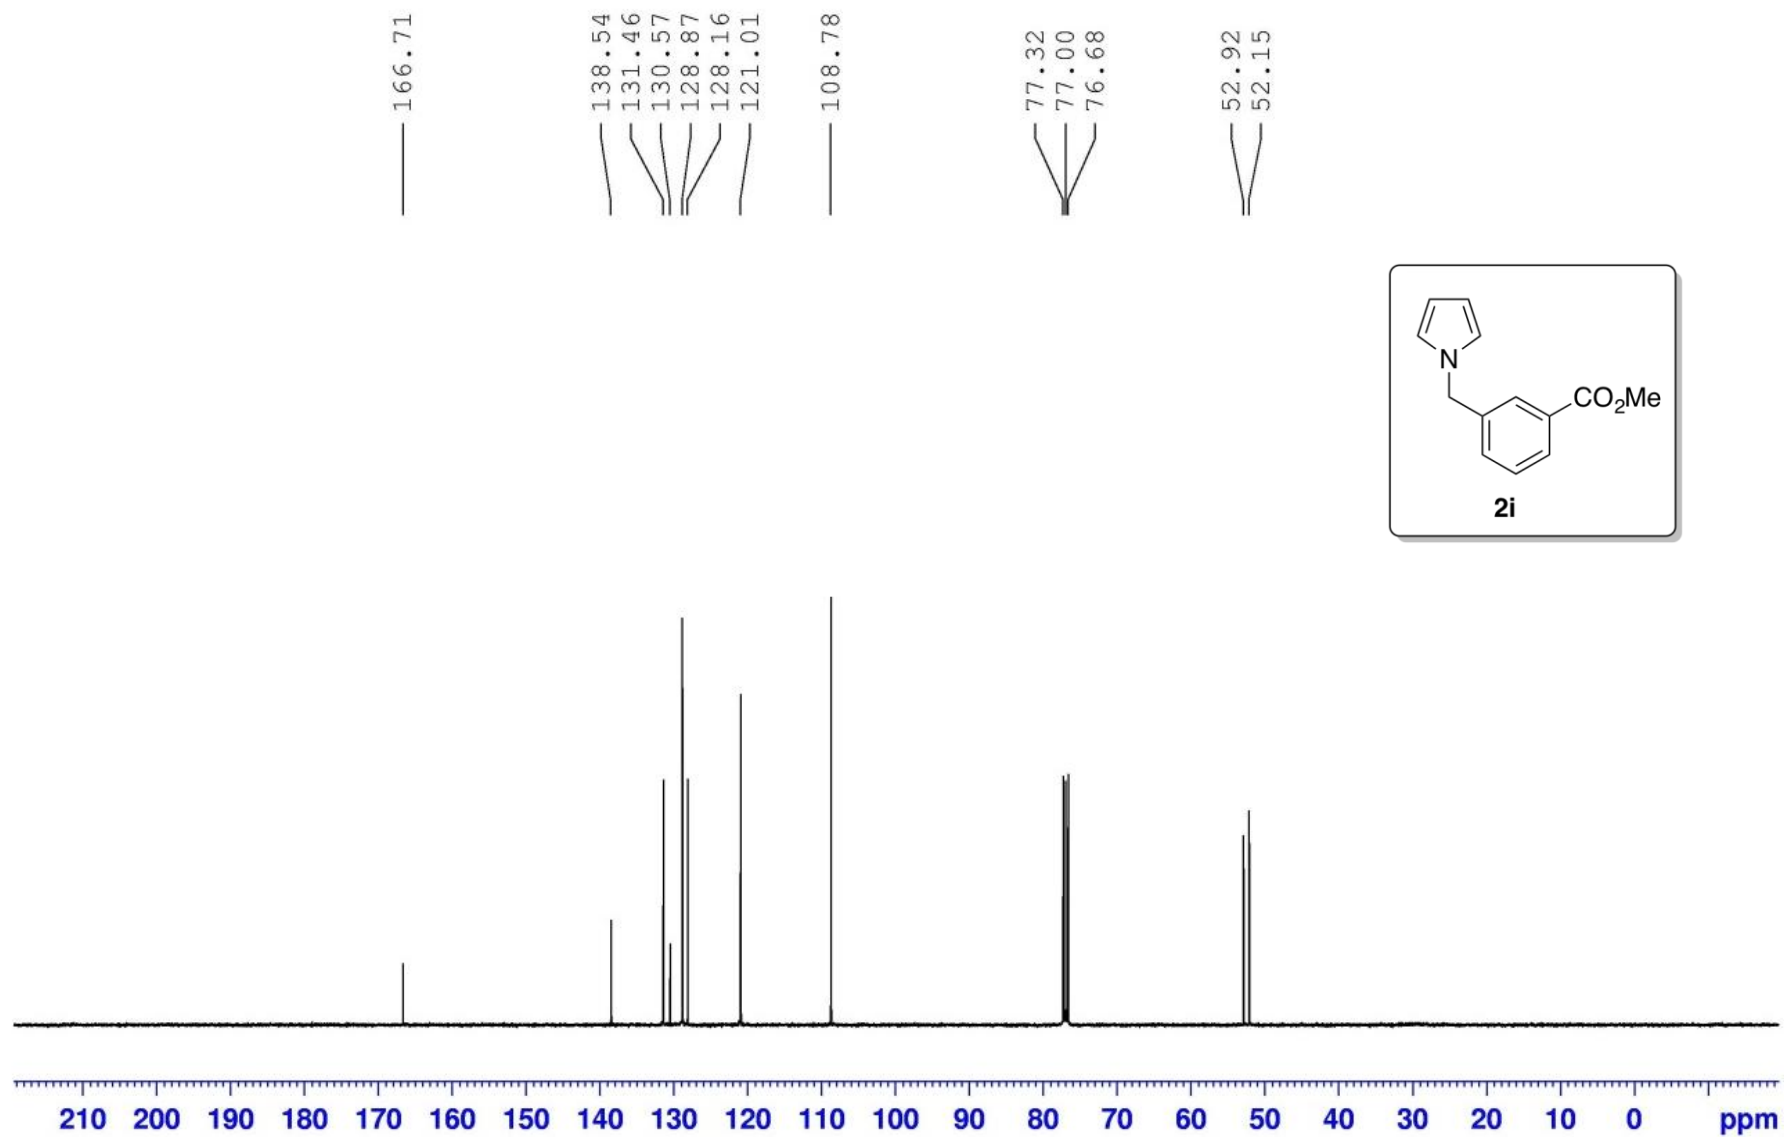

$^1\text{H}$  NMR ( $\text{CDCl}_3$ , 400 MHz) spectrum of 1-(4-((1*H*-pyrrol-1-yl)methyl)phenyl)ethanone (**2j**)

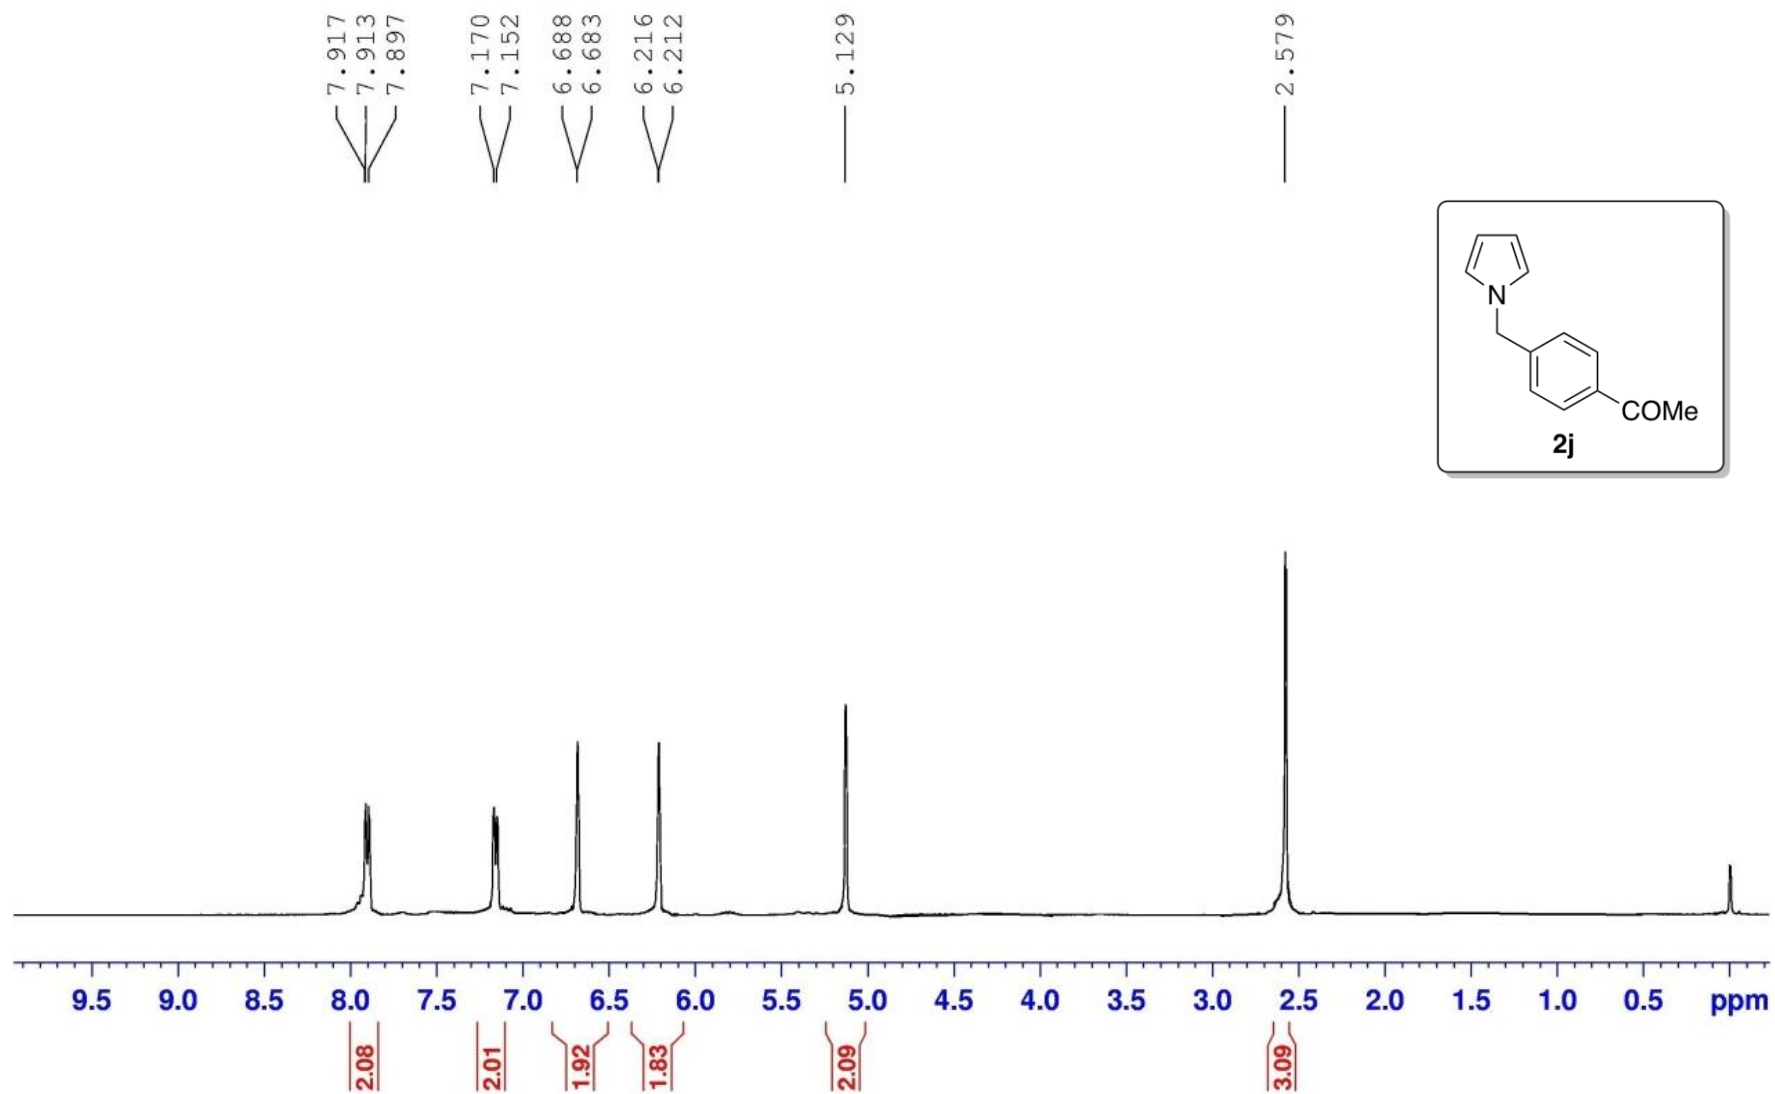



$^{13}\text{C}$  NMR ( $\text{CDCl}_3$ , 100 MHz) spectrum of 1-(4-((1*H*-pyrrol-1-yl)methyl)phenyl)ethanone (**2j**)

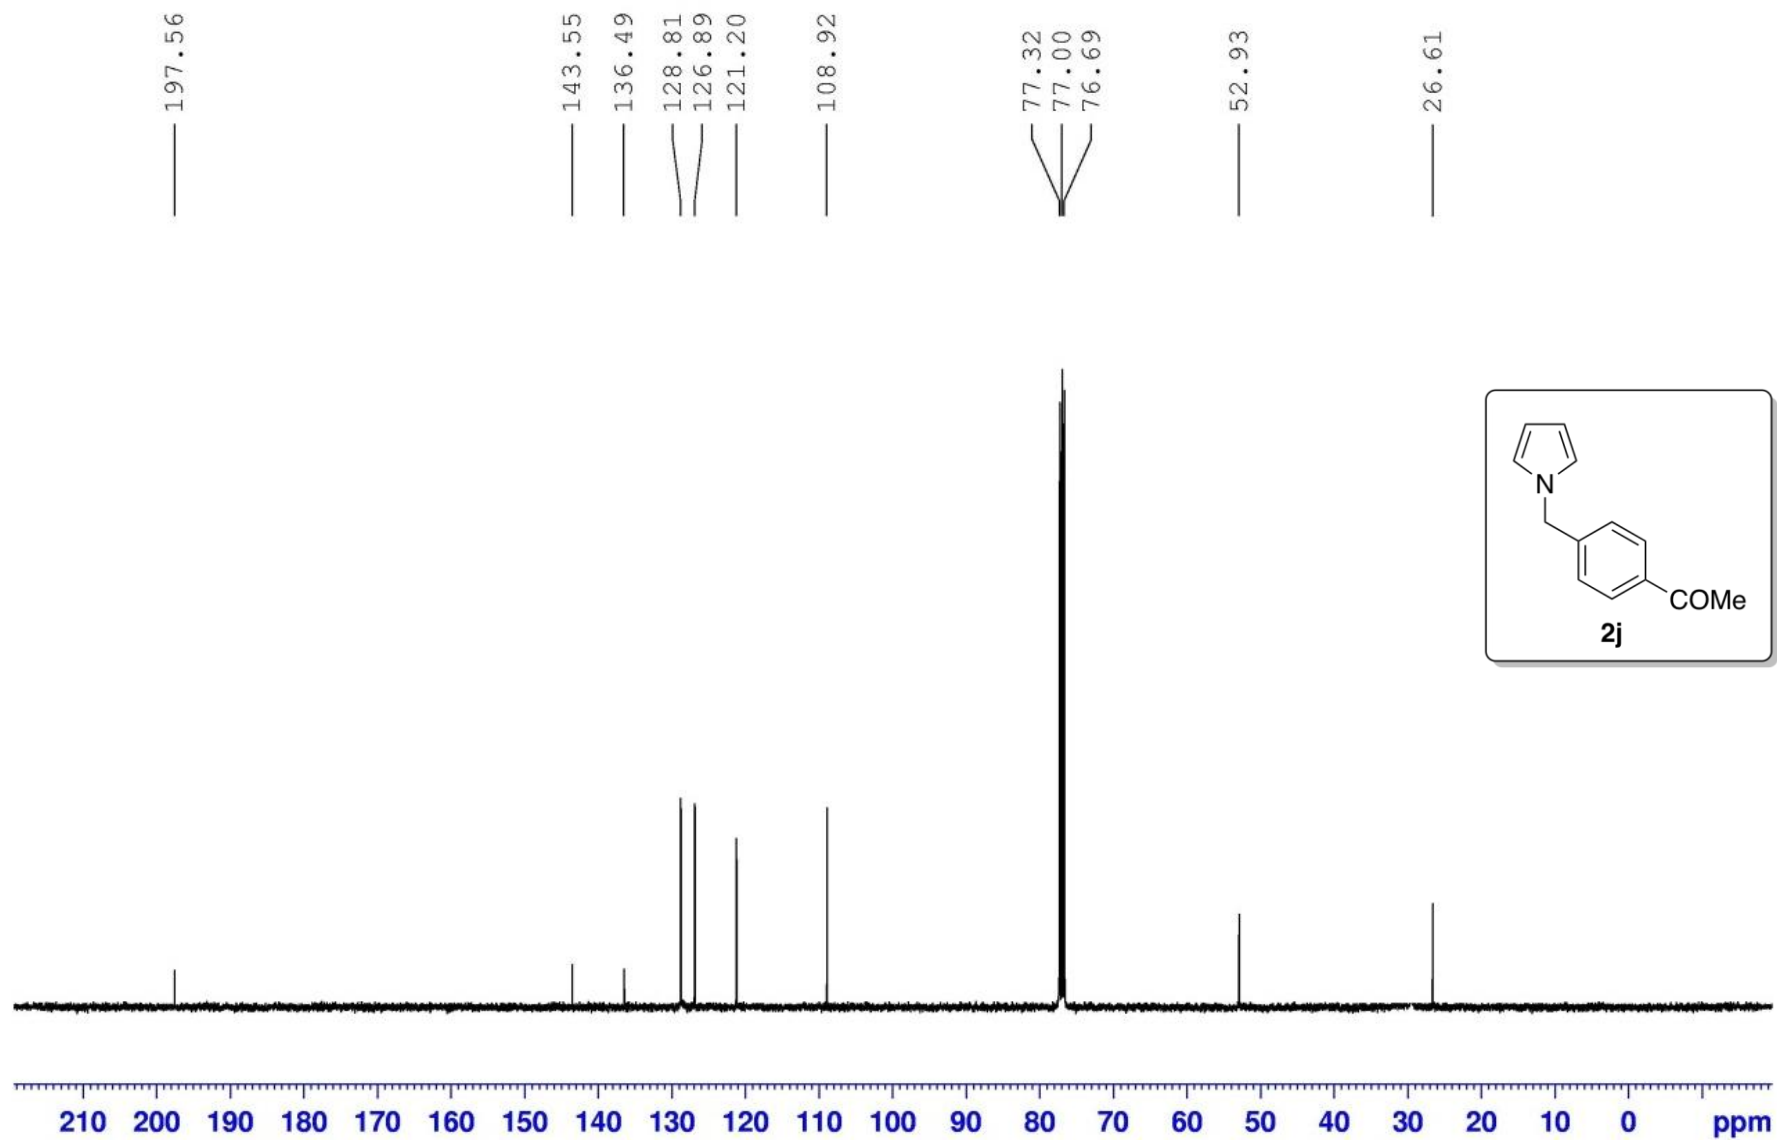

$^1\text{H}$  NMR ( $\text{CDCl}_3$ , 400 MHz) spectrum of 1-(3-((1*H*-pyrrol-1-yl)methyl)phenyl)ethanone (**2k**)

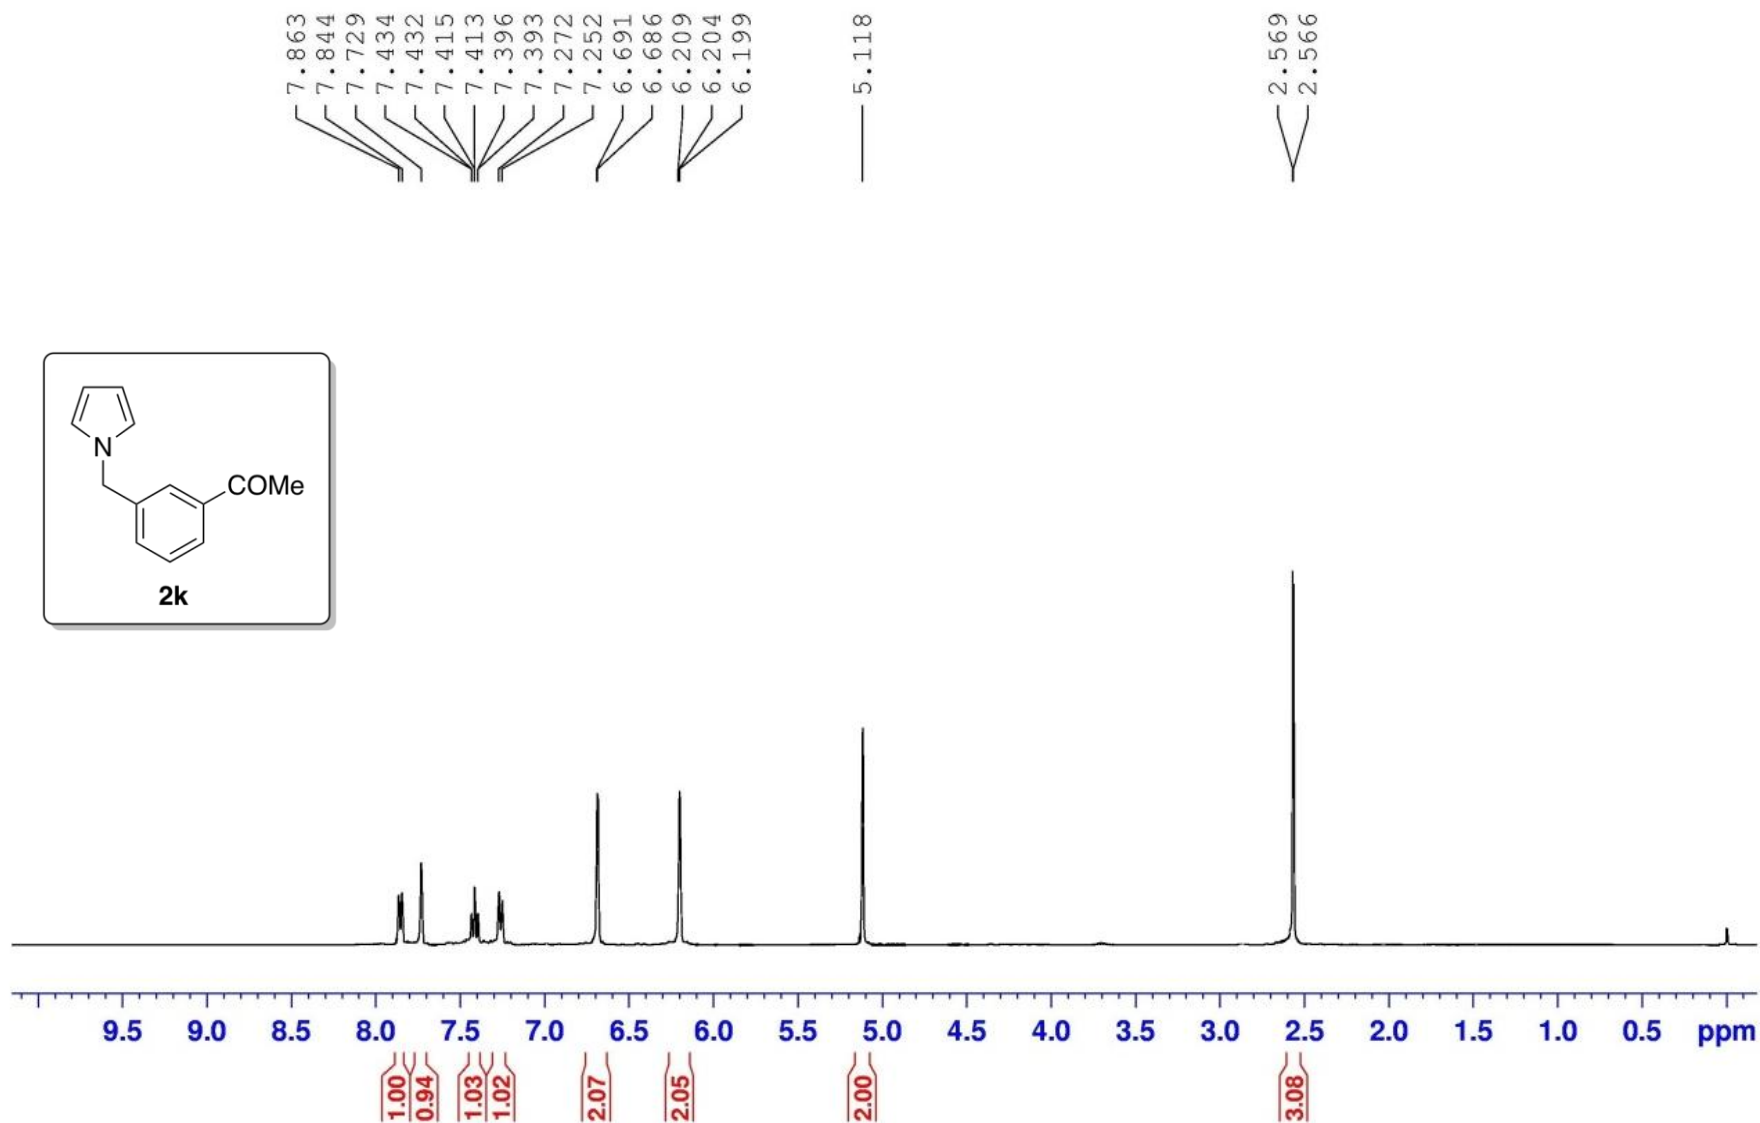

$^{13}\text{C}$  NMR ( $\text{CDCl}_3$ , 100 MHz) spectrum of 1-(3-((1*H*-pyrrol-1-yl)methyl)phenyl)ethanone (**2k**)

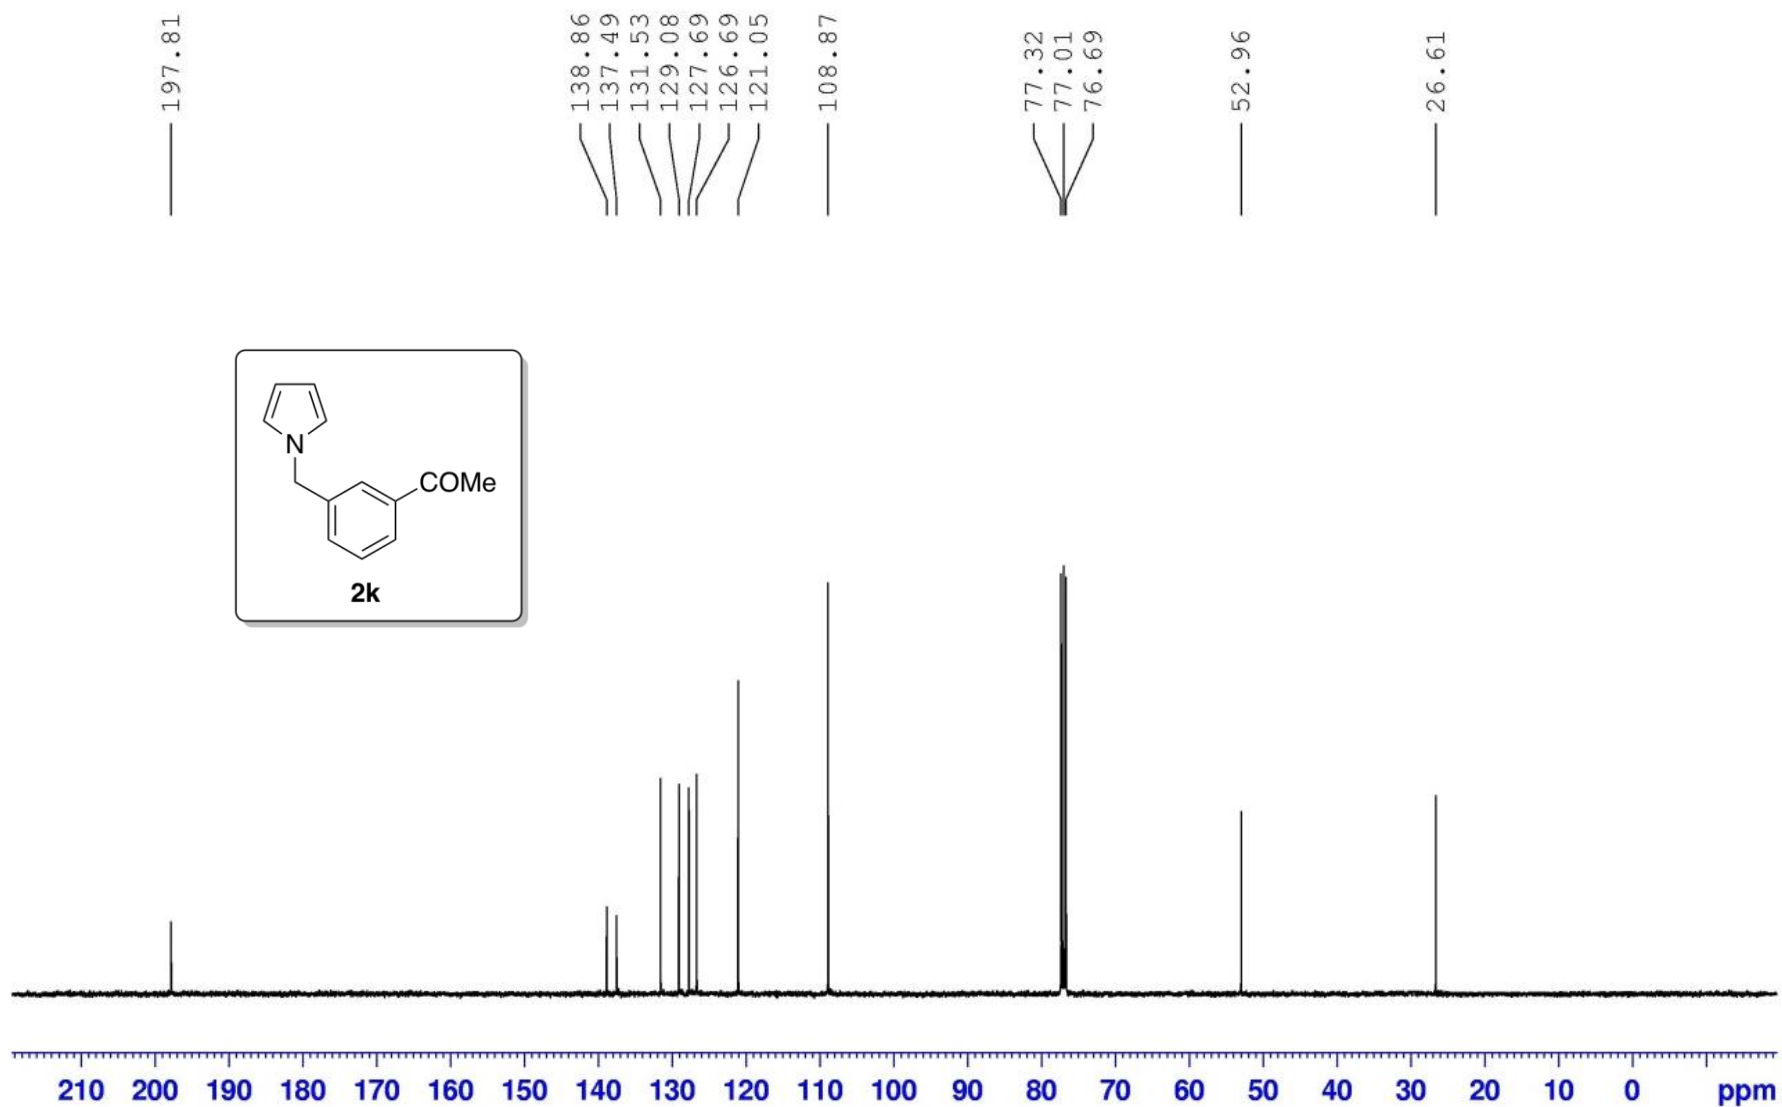

$^1\text{H}$  NMR ( $\text{CDCl}_3$ , 400 MHz) spectrum of 1-benzyl-1*H*-pyrrole (**21**)

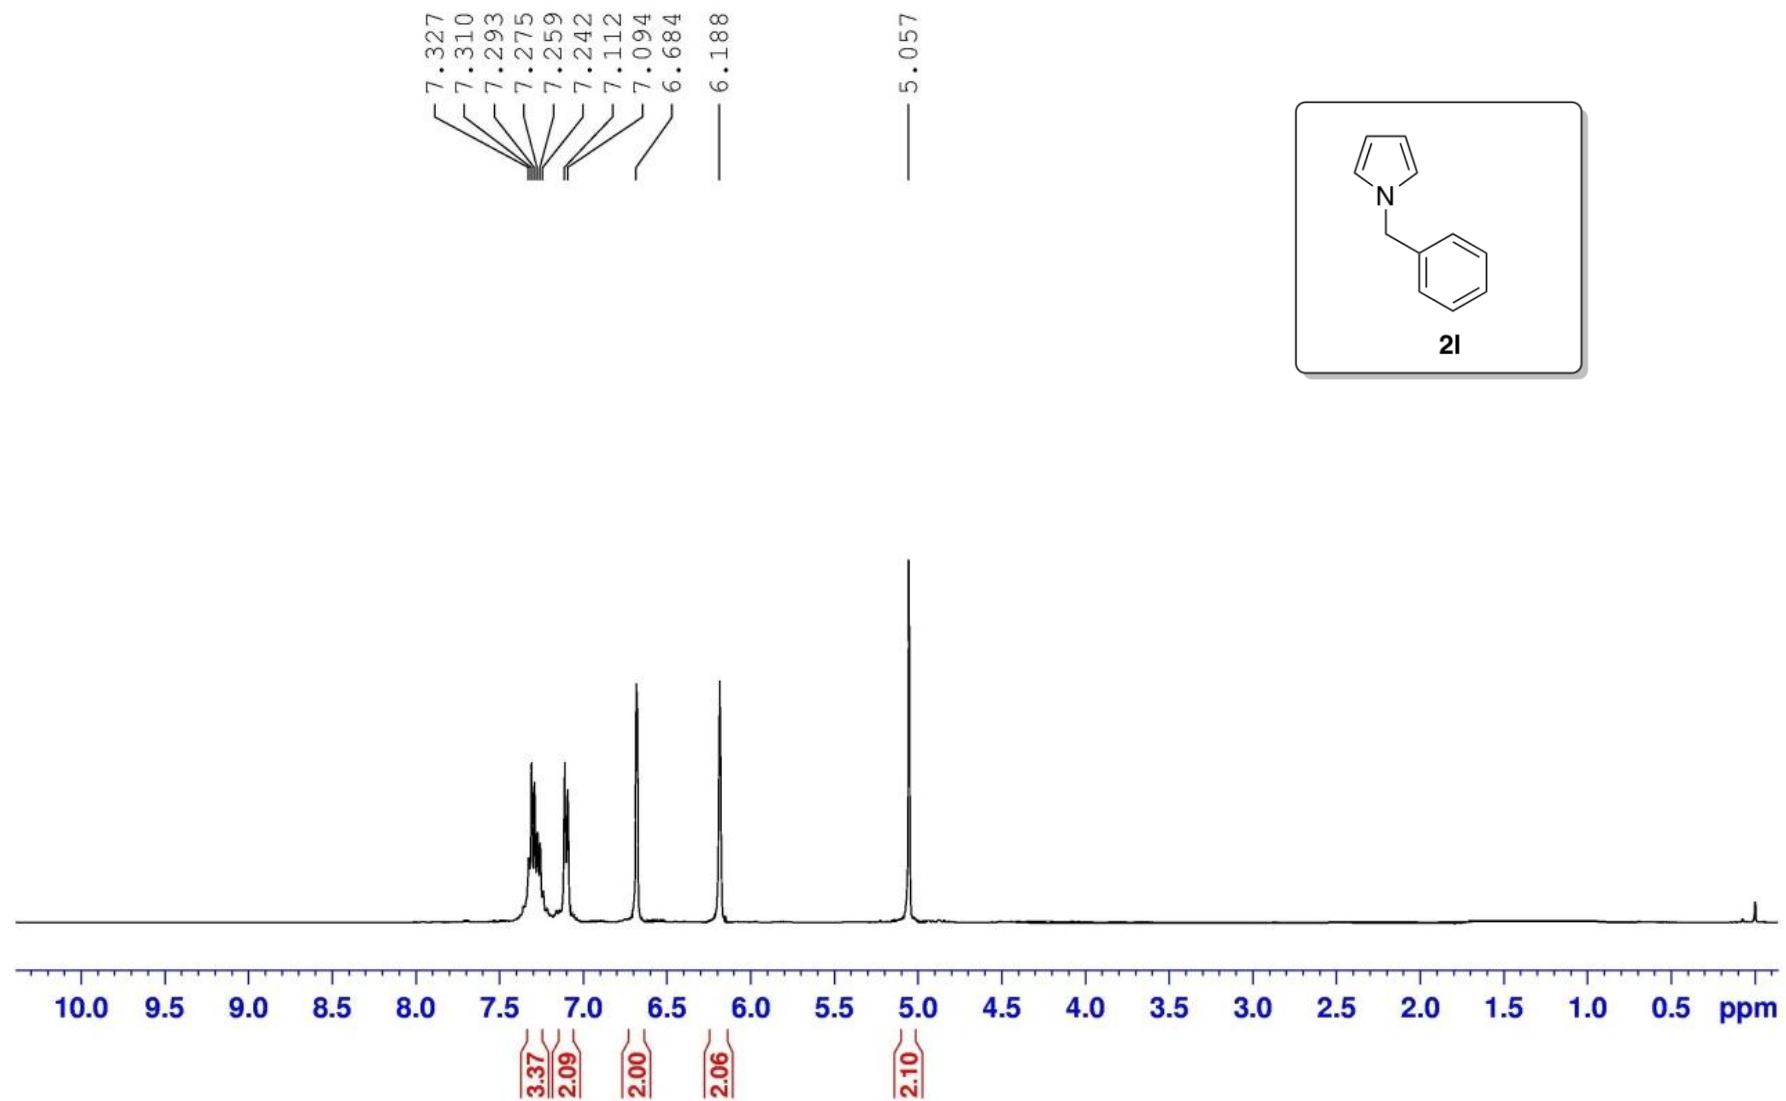

$^{13}\text{C}$  NMR ( $\text{CDCl}_3$ , 100 MHz) spectrum of 1-benzyl-1*H*-pyrrole (**21**)

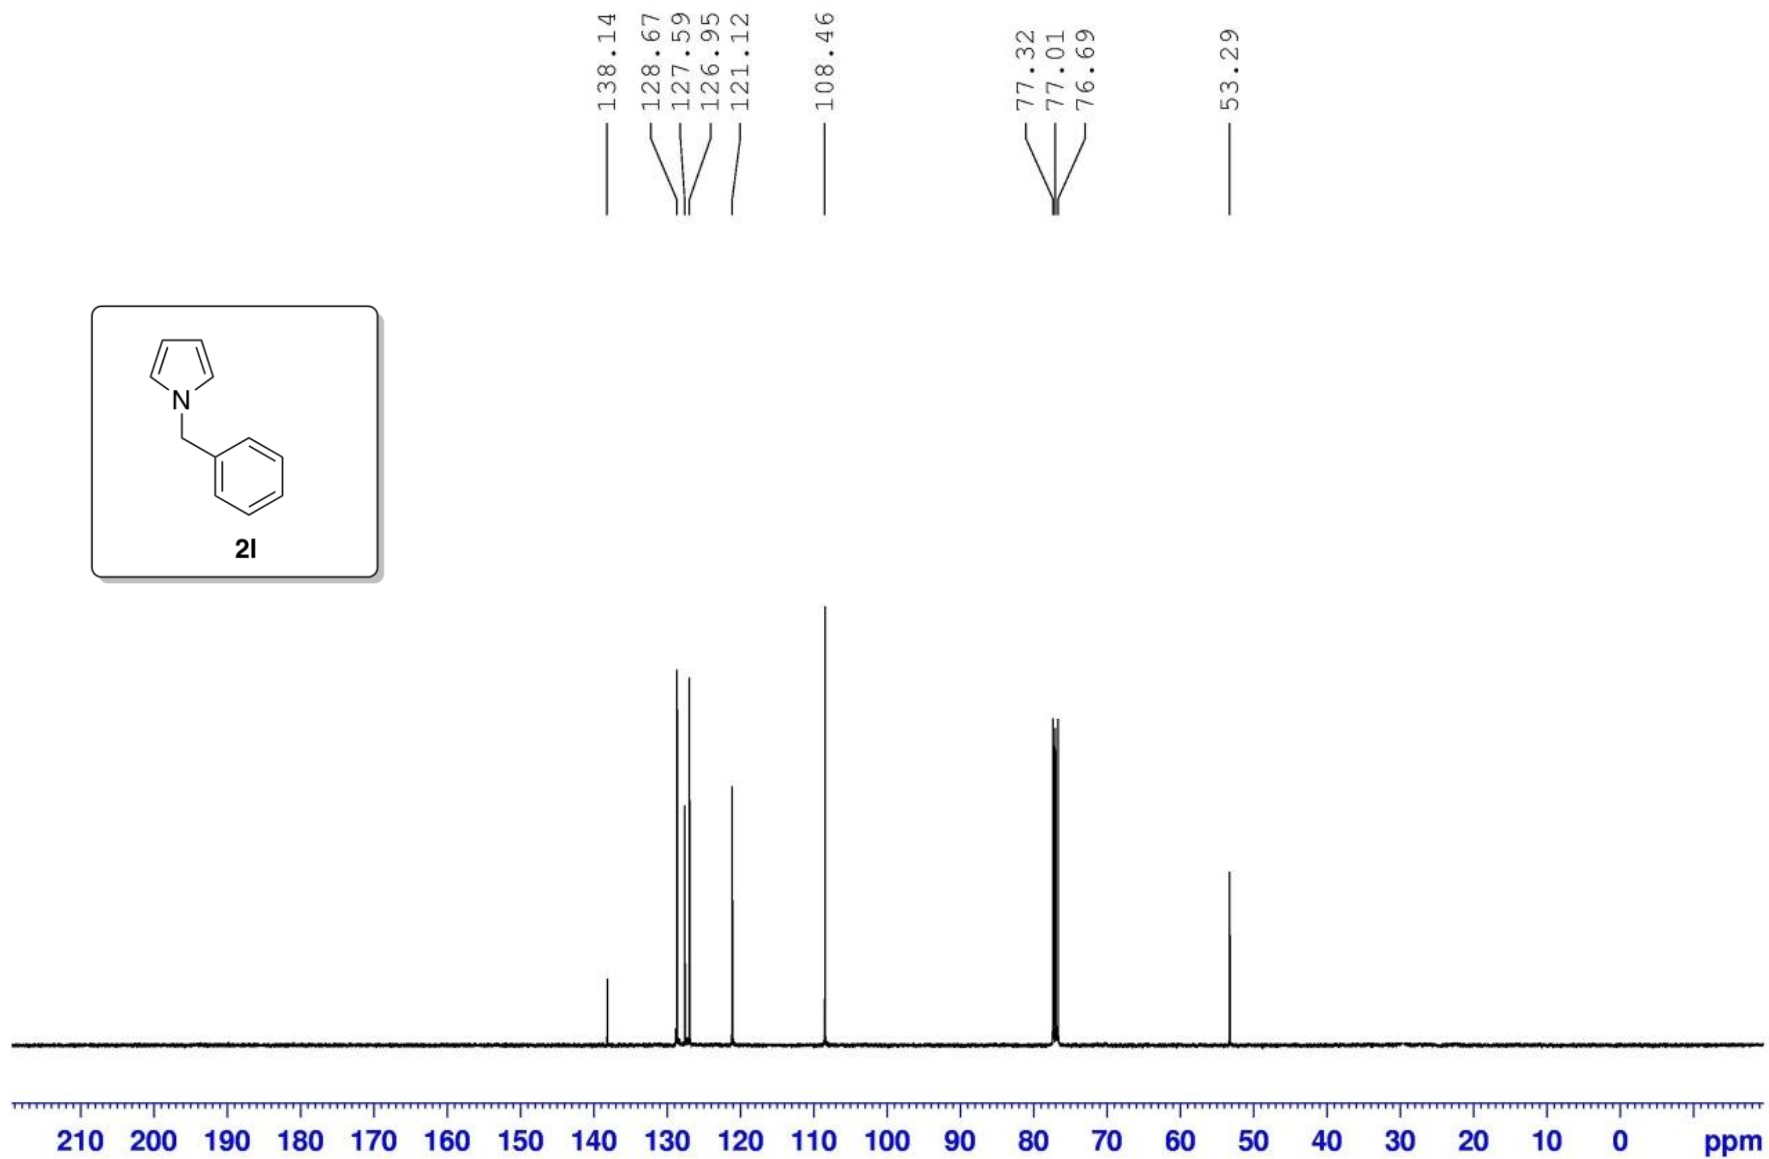

$^1\text{H}$  NMR ( $\text{CDCl}_3$ , 500 MHz) spectrum of 4-((1*H*-pyrrol-1-yl)methyl)benzonitrile (**2m**)

7.616  
7.599  
7.260  
7.155  
7.139  
6.684  
6.680  
6.676  
6.239  
6.235  
6.231  
5.143

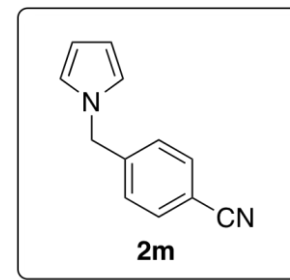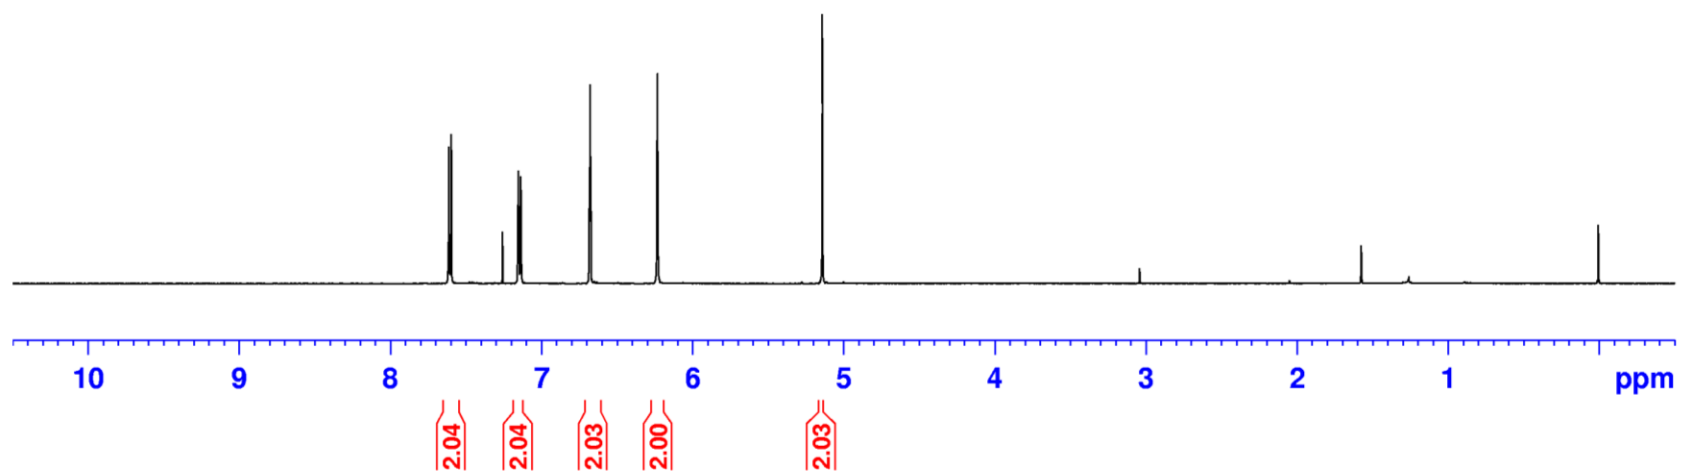

$^{13}\text{C}$  NMR ( $\text{CDCl}_3$ , 125.8 MHz) spectrum of 4-((1*H*-pyrrol-1-yl)methyl)benzonitrile (**2m**)

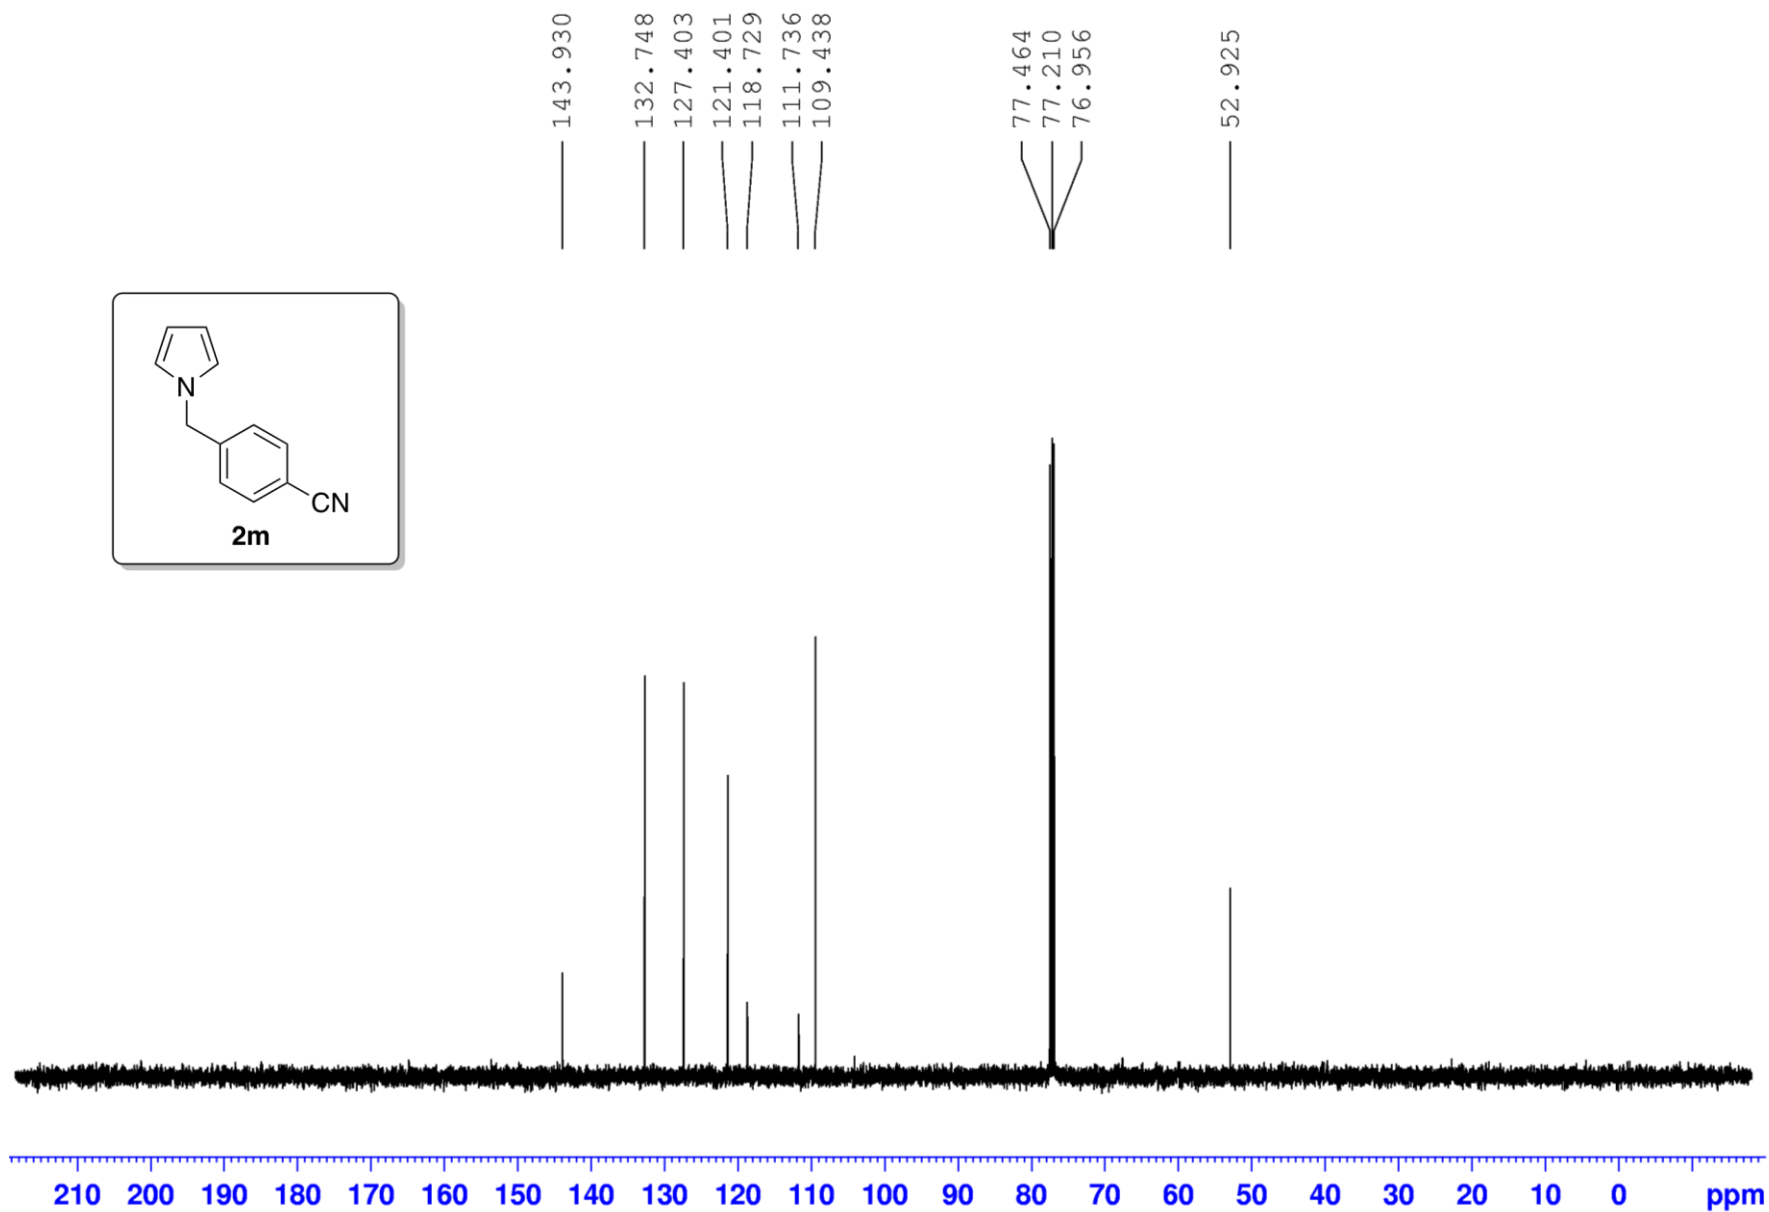

$^1\text{H}$  NMR ( $\text{CDCl}_3$ , 400 MHz) spectrum of 1-(4-(1*H*-pyrrol-1-yl)benzyl)-1*H*-pyrrole (**2n**)

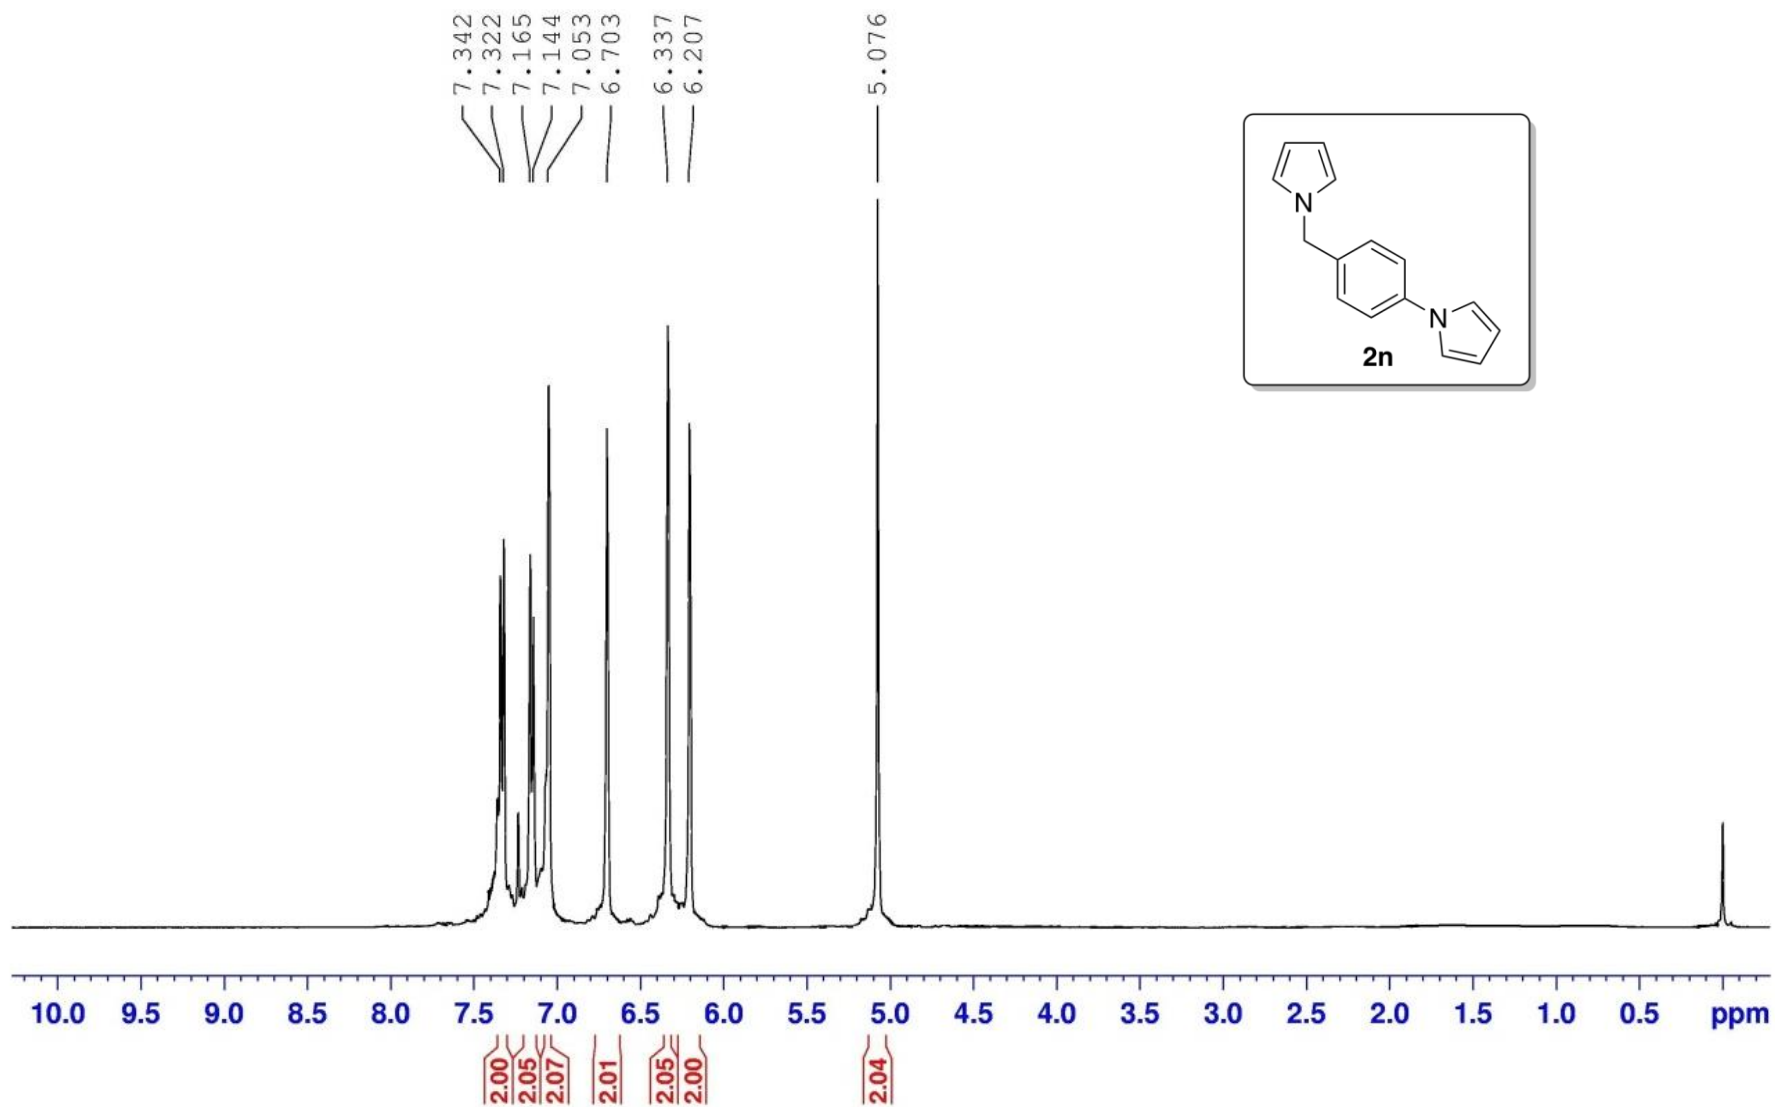



$^{13}\text{C}$  NMR ( $\text{CDCl}_3$ , 100 MHz) spectrum of 1-(4-(1*H*-pyrrol-1-yl)benzyl)-1*H*-pyrrole (**2n**)

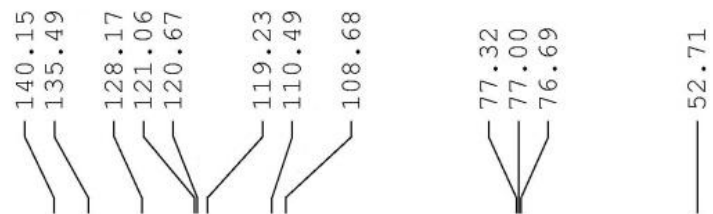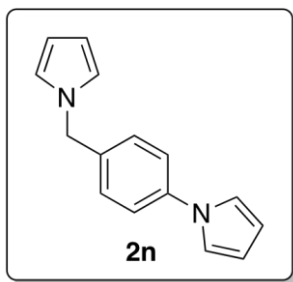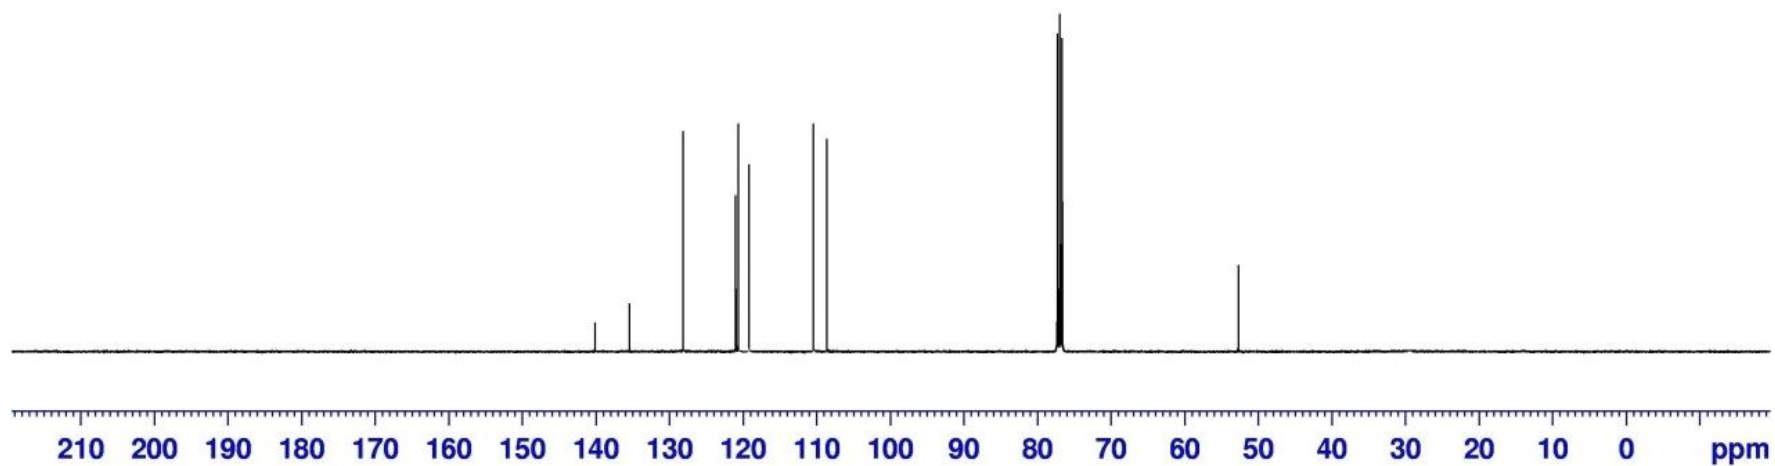

$^1\text{H}$  NMR ( $\text{CDCl}_3$ , 400 MHz) spectrum of 1-(4-nitrobenzyl)-1*H*-pyrrole (**2o**)

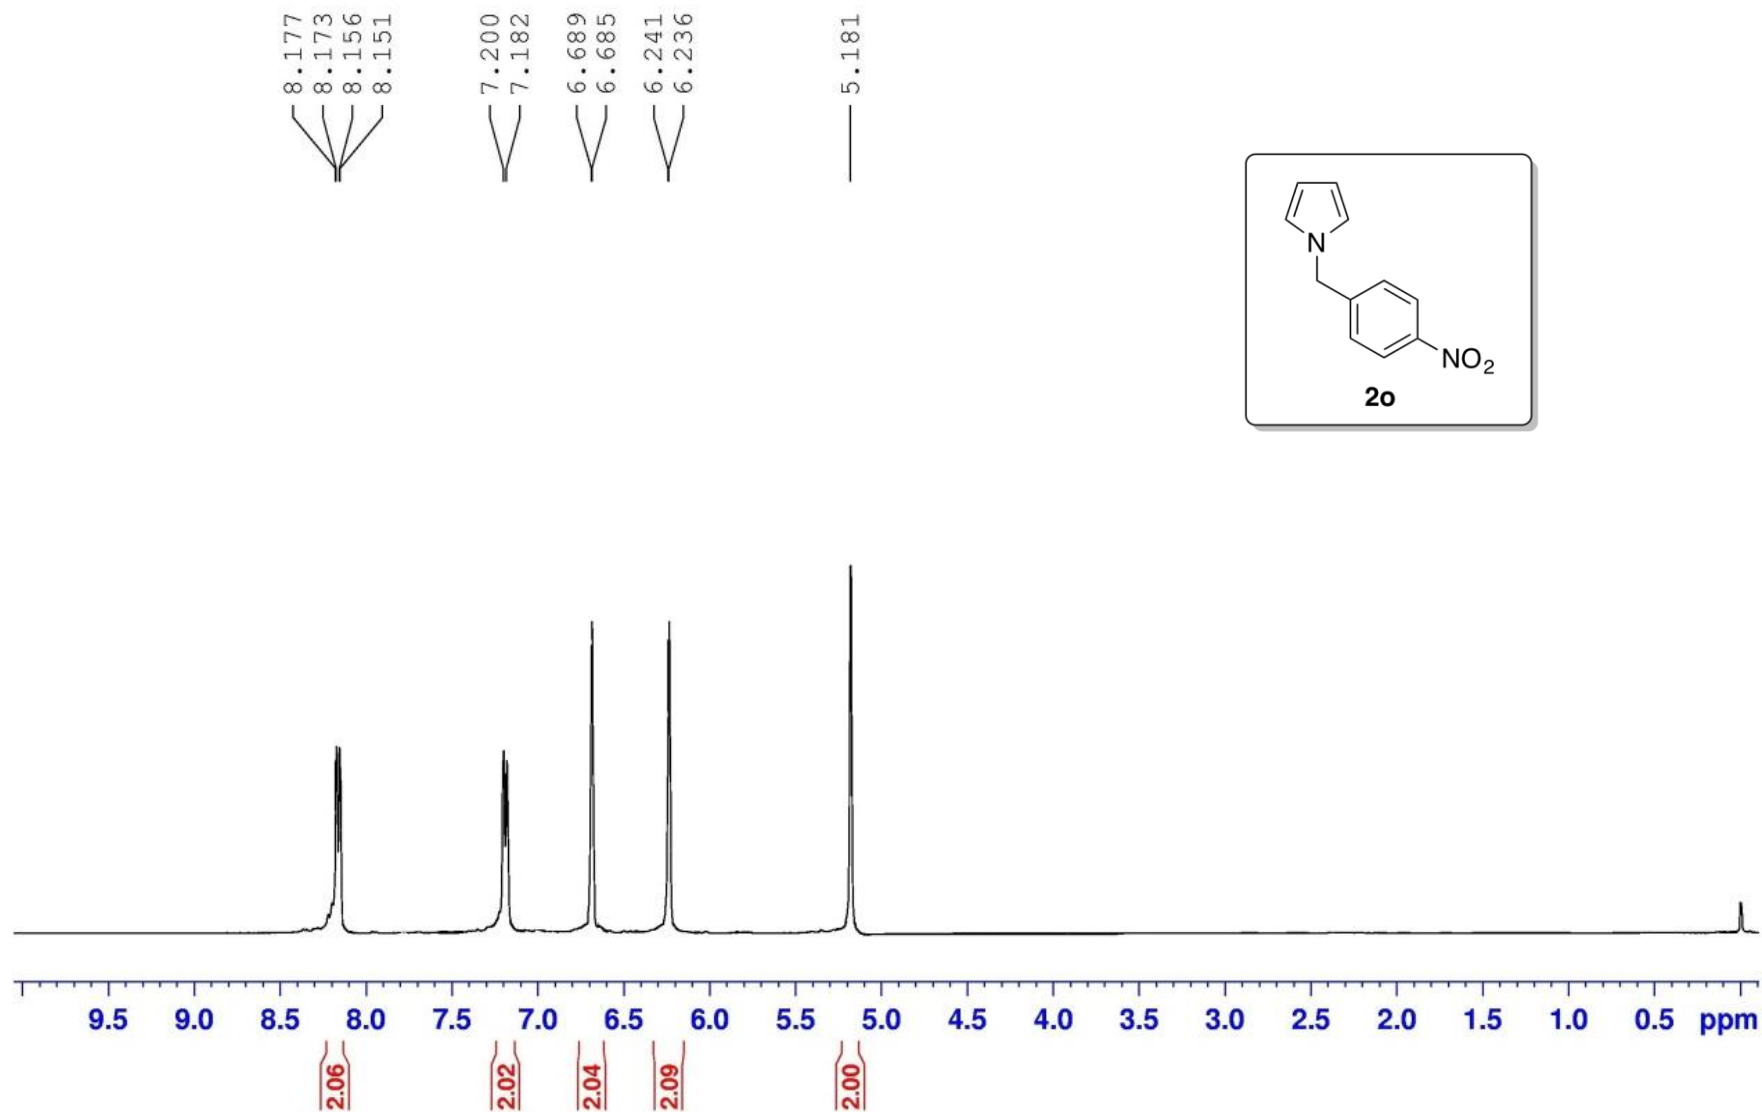

$^{13}\text{C}$  NMR ( $\text{CDCl}_3$ , 100 MHz) spectrum of 1-(4-nitrobenzyl)-1H-pyrrole (**2o**)

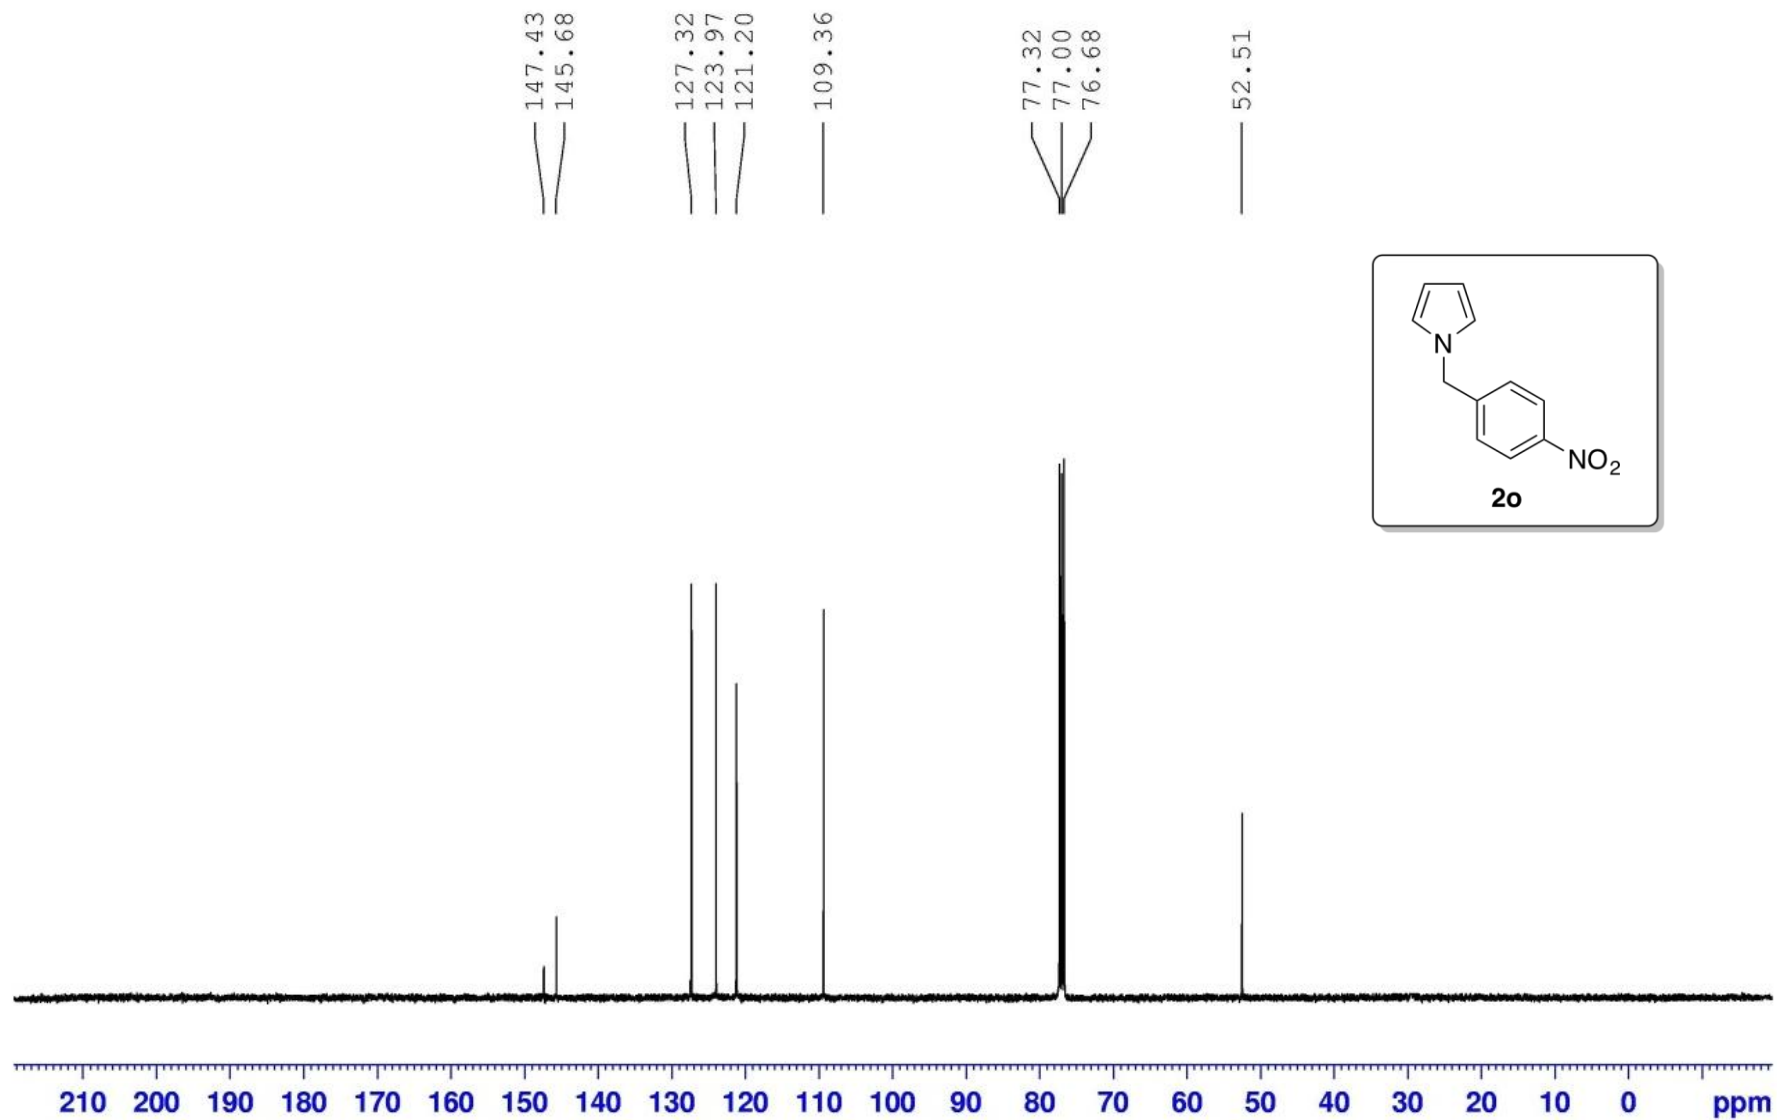

$^1\text{H}$  NMR ( $\text{CDCl}_3$ , 500 MHz) spectrum of 1-(4-(trifluoromethyl)benzyl)-1*H*-pyrrole (**2p**)

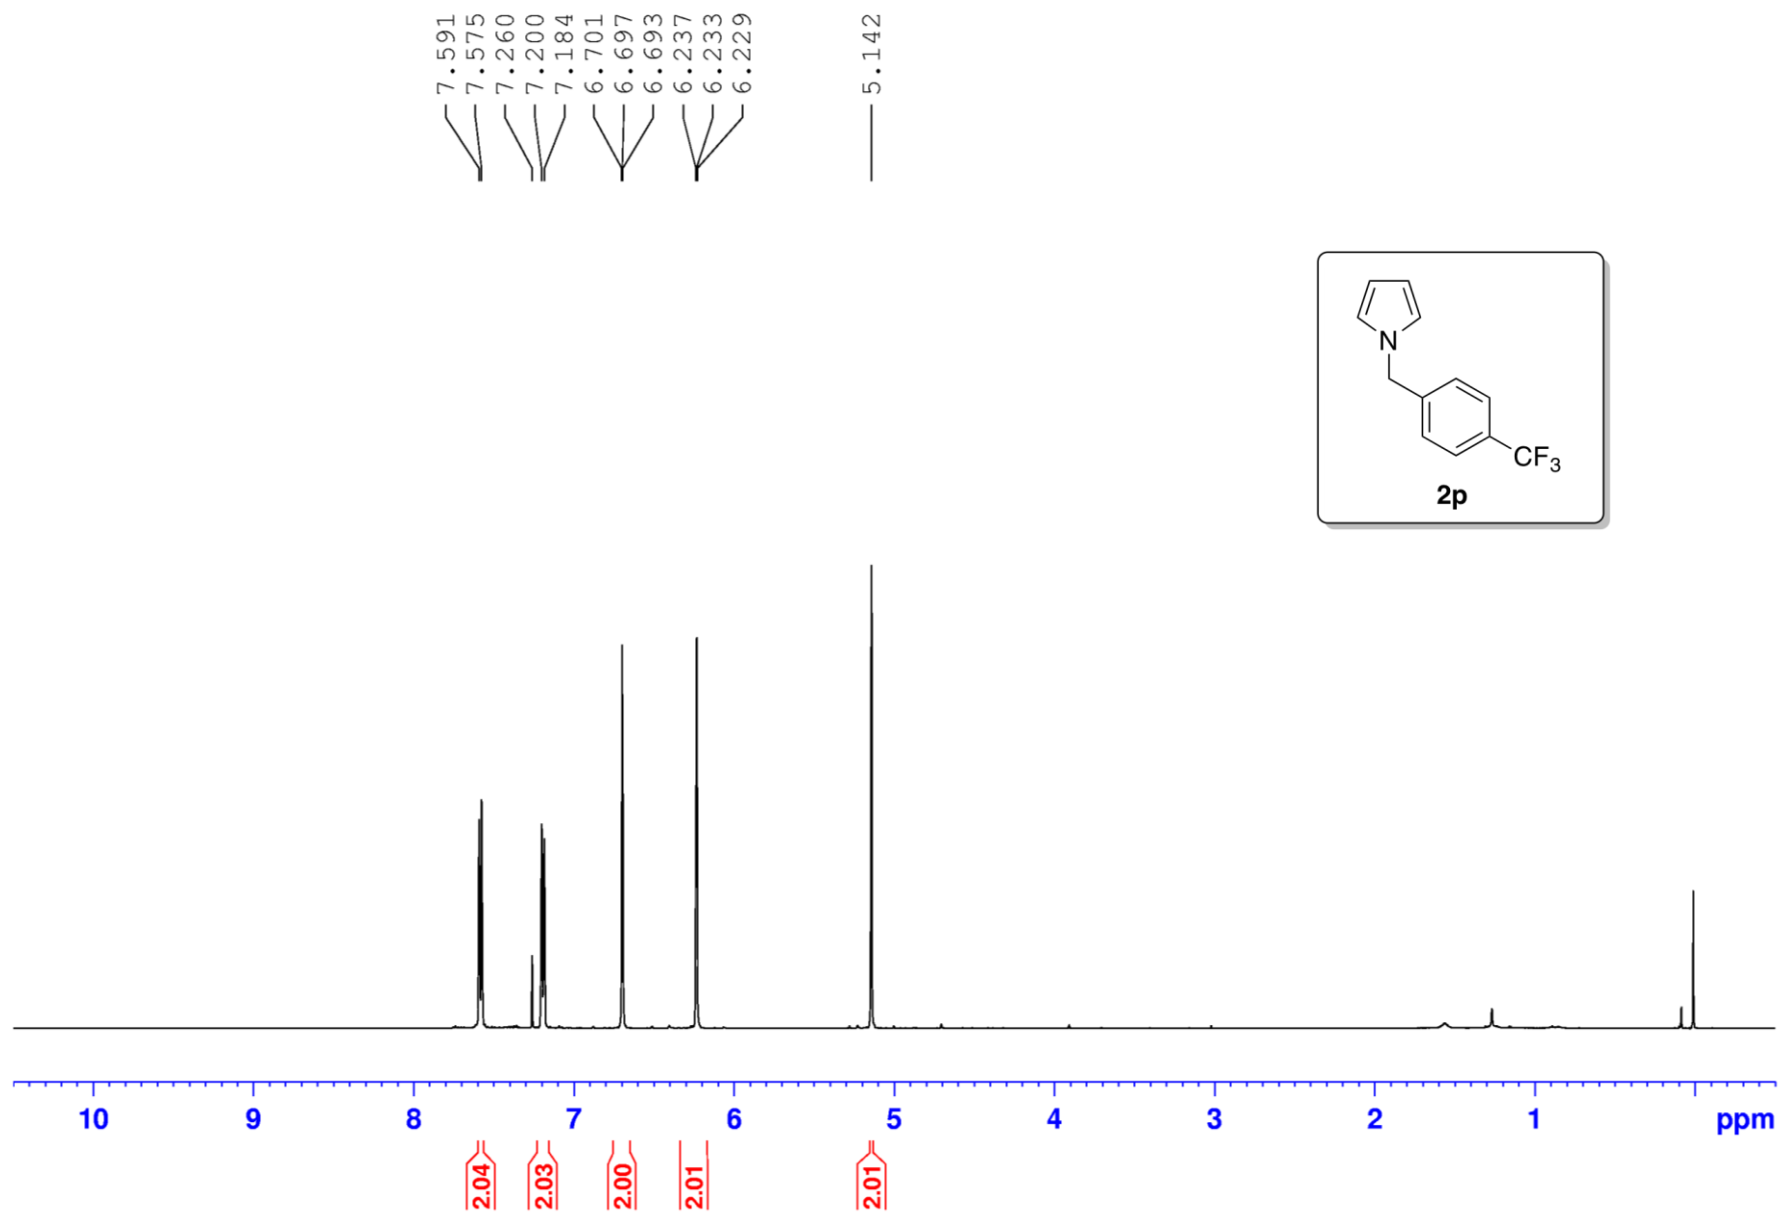

$^{13}\text{C}$  NMR ( $\text{CDCl}_3$ , 125.8 MHz) spectrum of 1-(4-(trifluoromethyl)benzyl)-1*H*-pyrrole (**2p**)

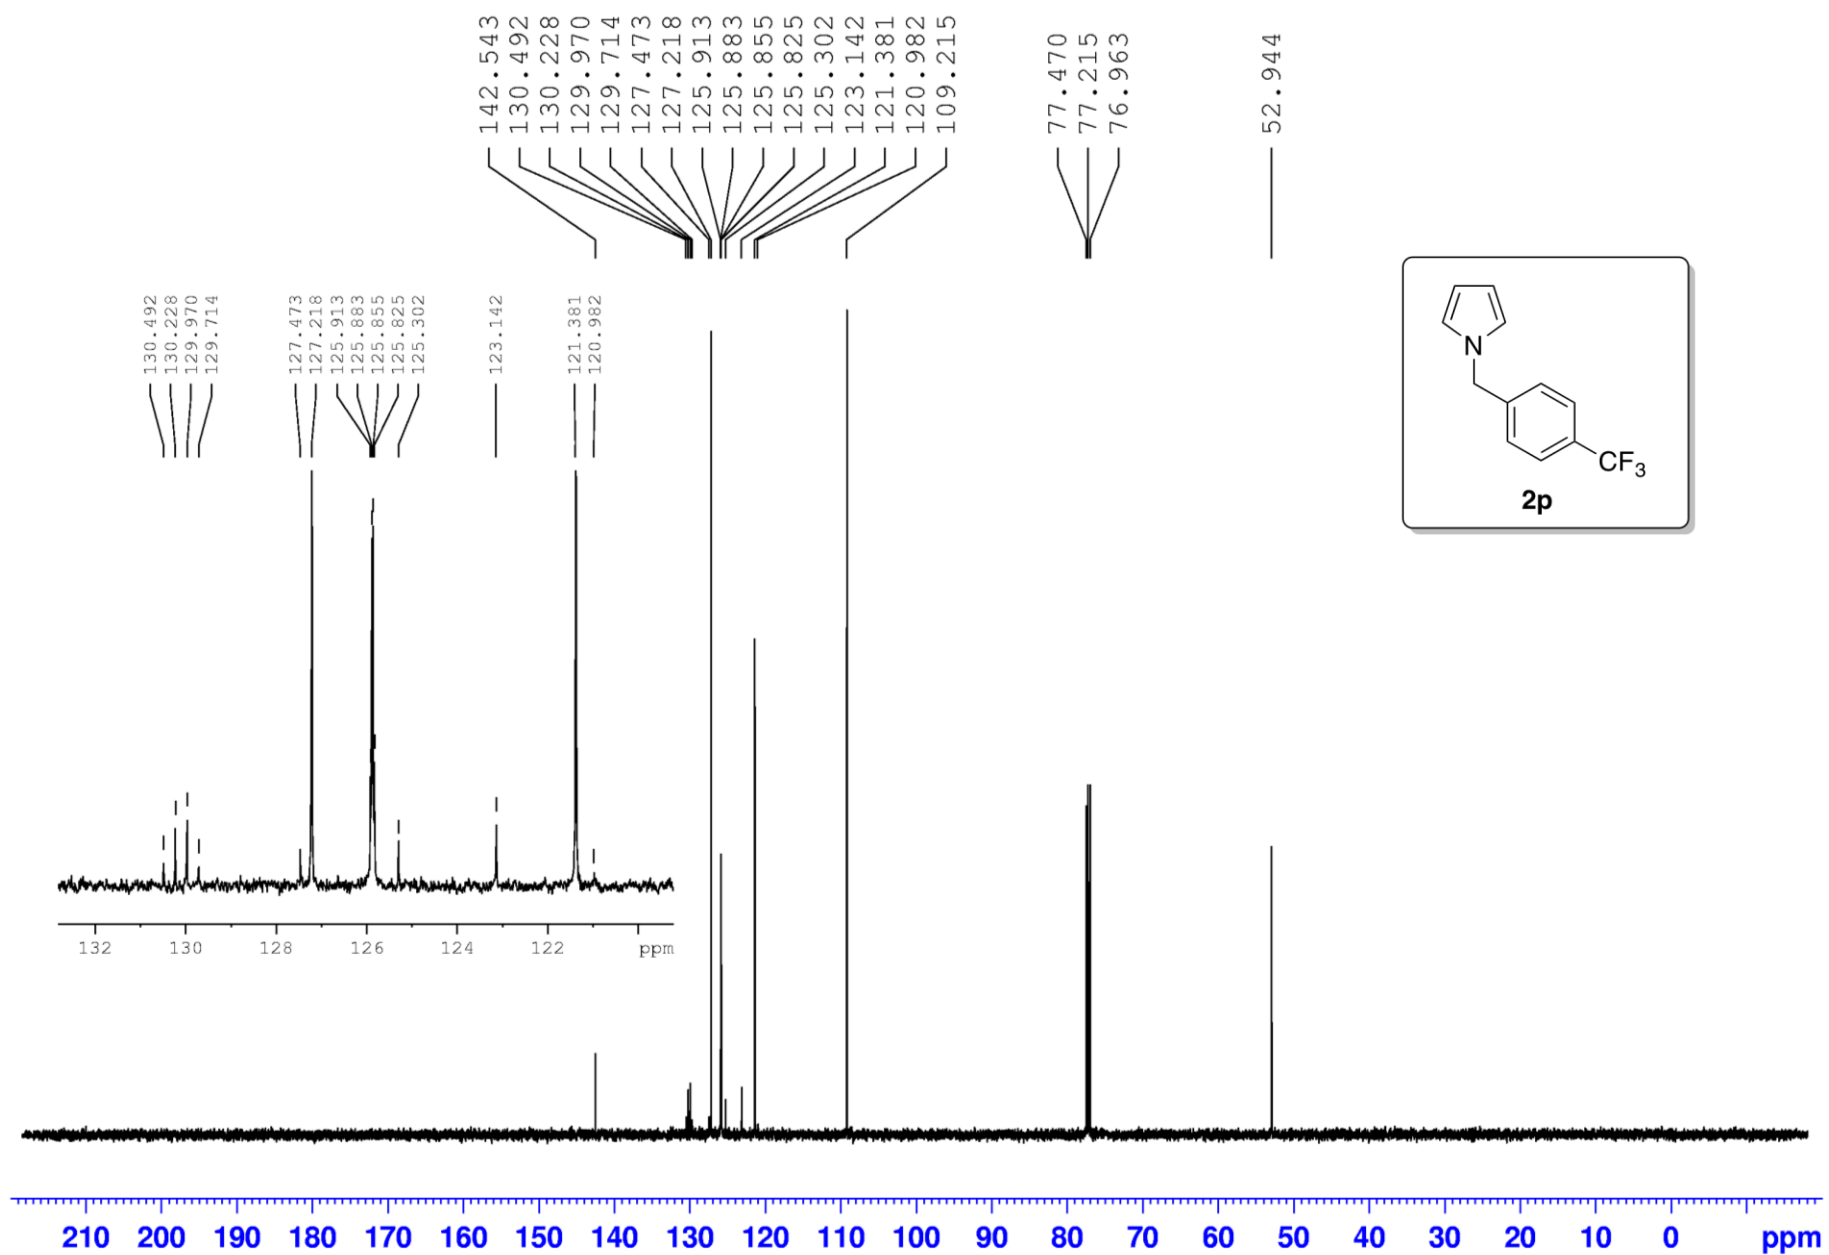

$^{19}\text{F}$  NMR ( $\text{CDCl}_3$ , 470.8 MHz) spectrum of 1-(4-(trifluoromethyl)benzyl)-1*H*-pyrrole (**2p**)

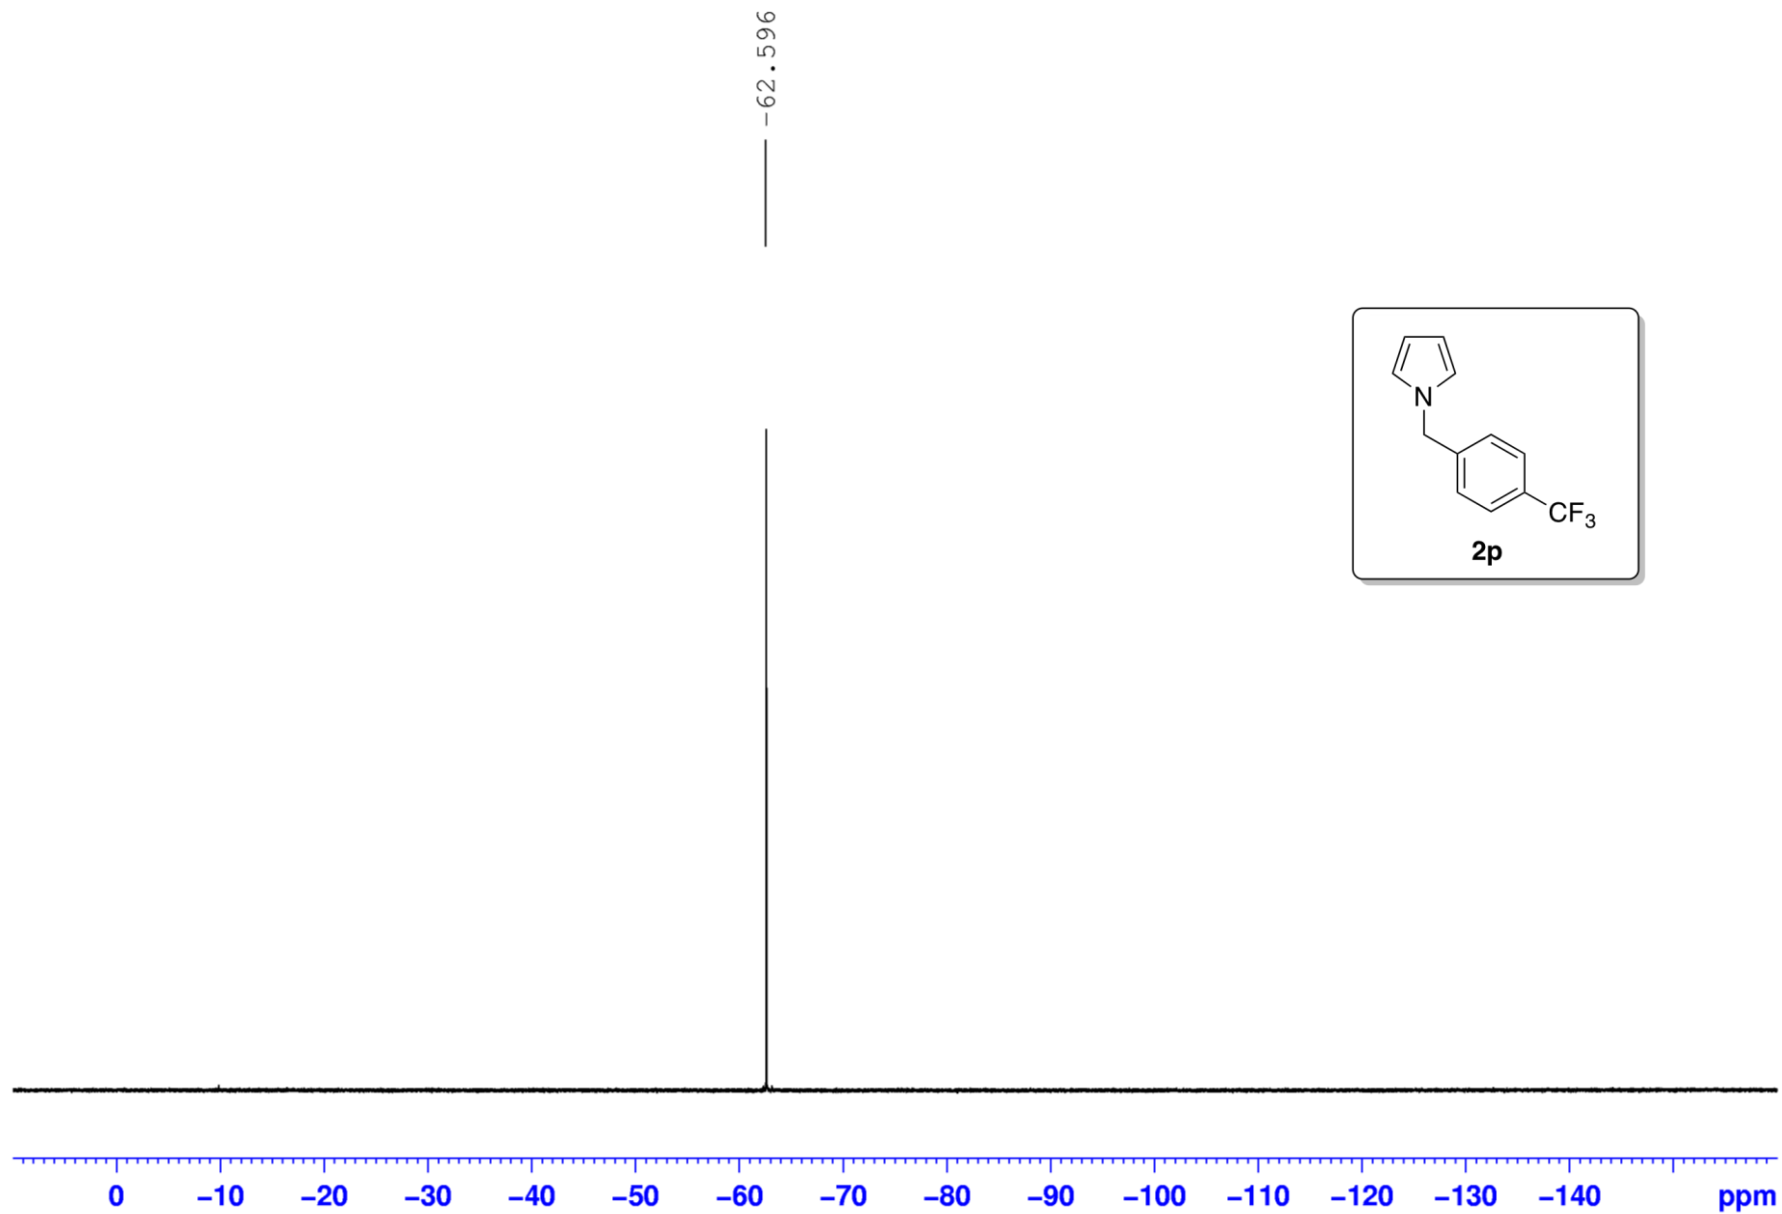

$^1\text{H}$  NMR ( $\text{CDCl}_3$ , 500 MHz) spectrum of 1-(4-fluorobenzyl)-1*H*-pyrrole (**2q**)

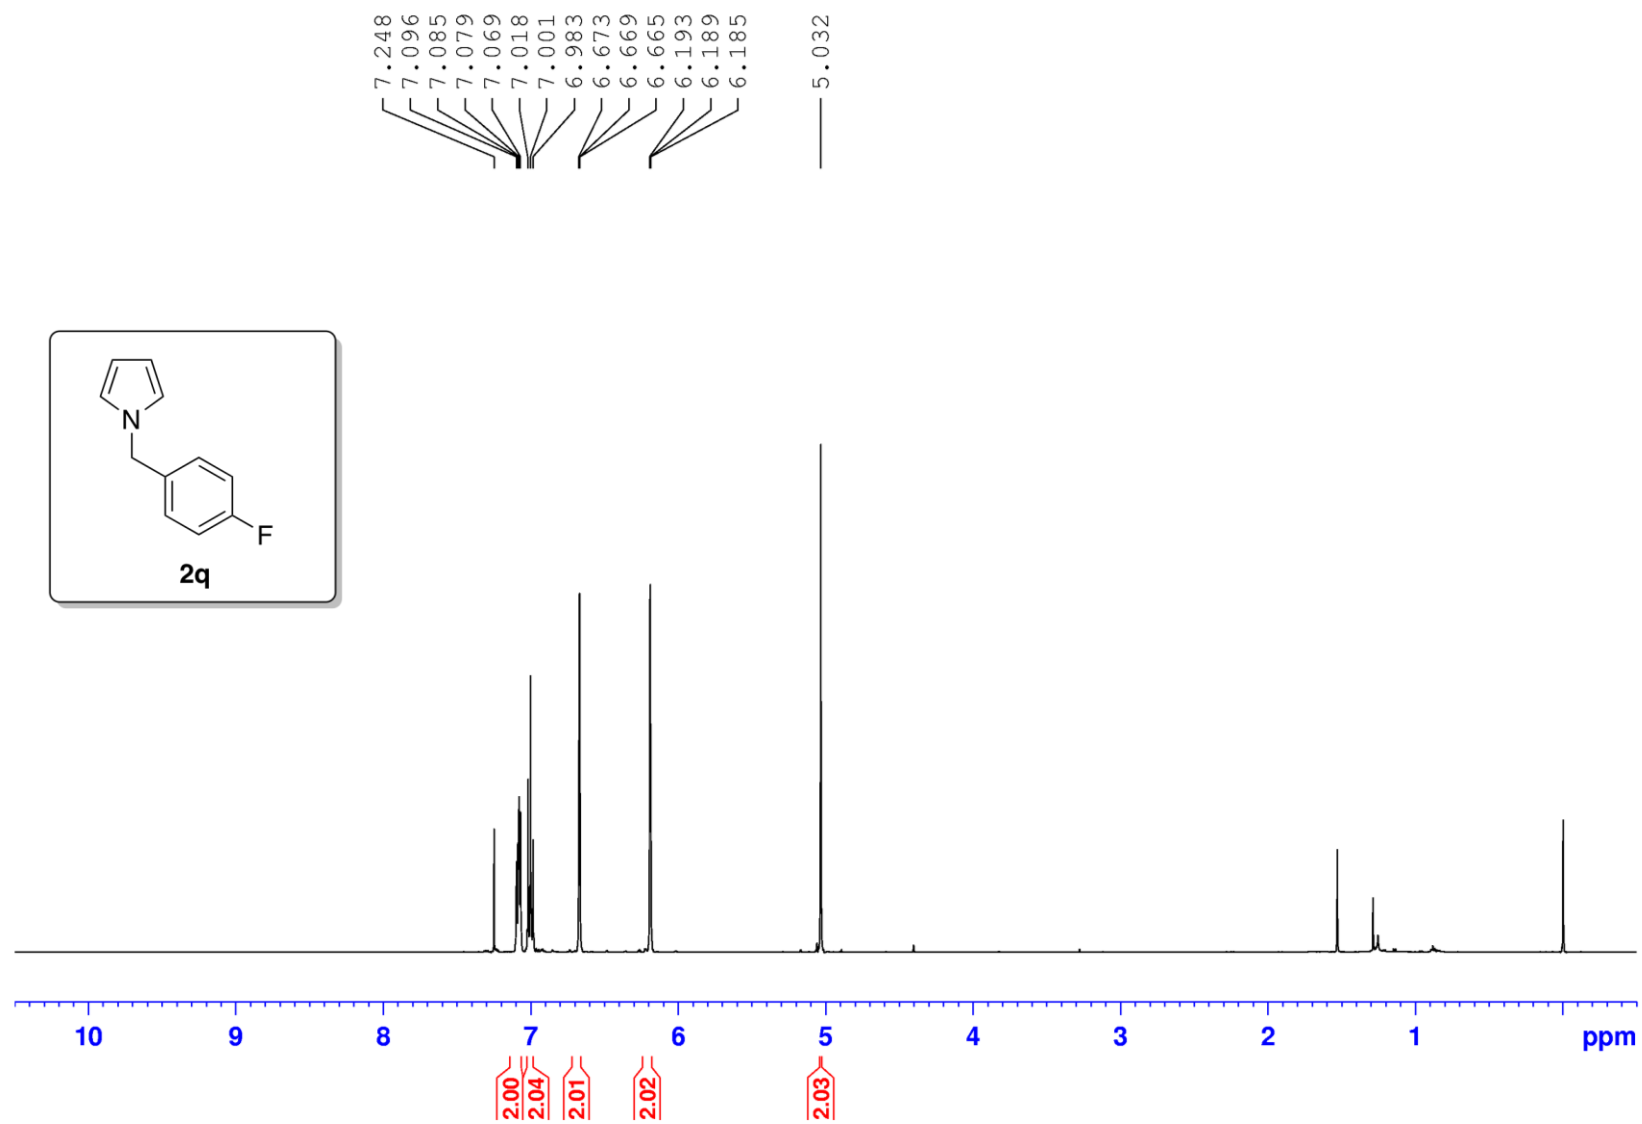

$^{12}\text{C}$  NMR ( $\text{CDCl}_3$ , 125.8 MHz) spectrum of 1-(4-fluorobenzyl)-1H-pyrrole (**2q**)

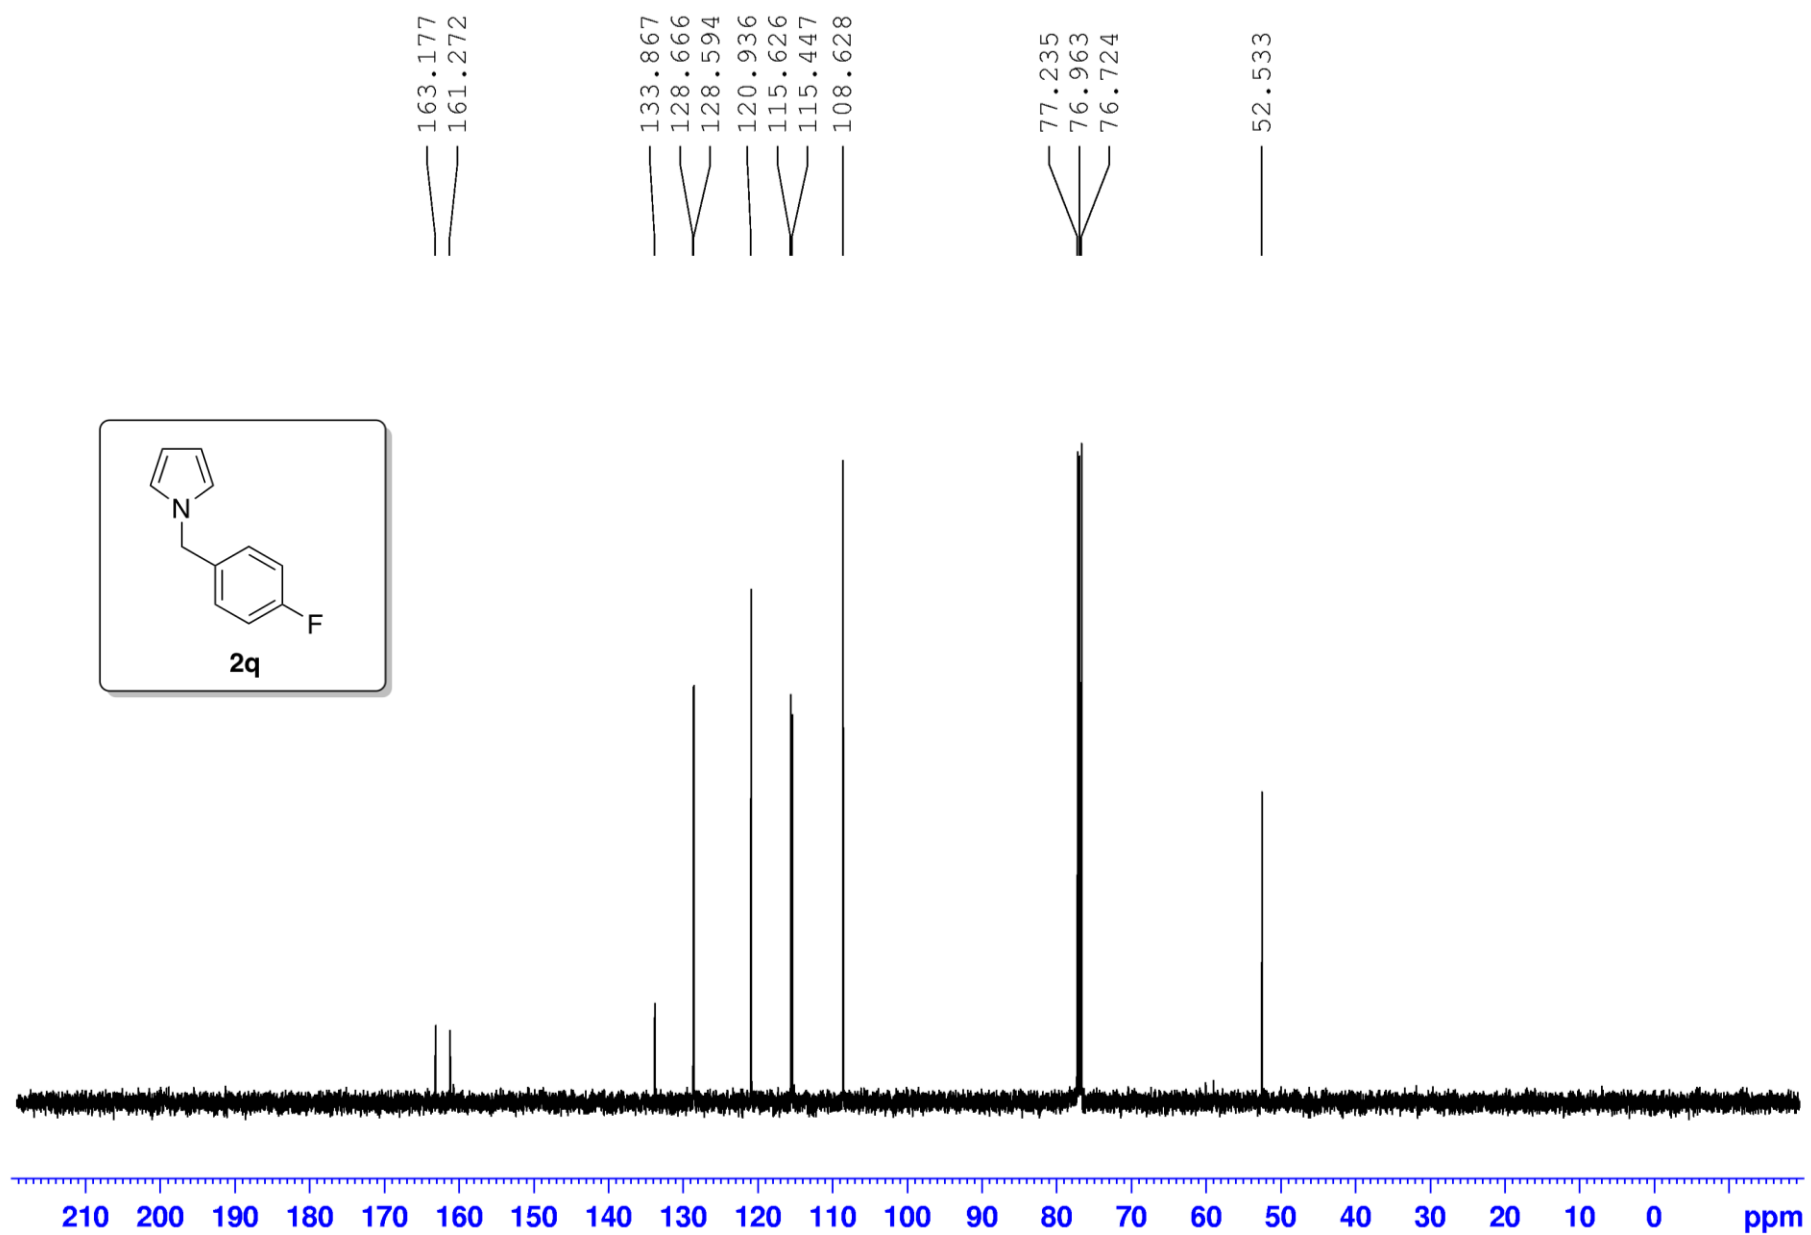



$^{19}\text{F}$  NMR ( $\text{CDCl}_3$ , 470.8 MHz) spectrum of 1-(4-fluorobenzyl)-1H-pyrrole (**2q**)

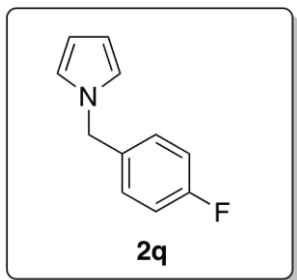

-114.803

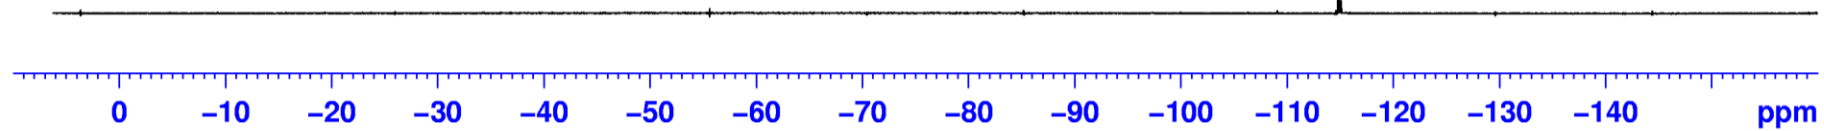

$^1\text{H}$  NMR ( $\text{CDCl}_3$ , 500 MHz) spectrum of 1-(3,5-difluorobenzyl)-1*H*-pyrrole (**2r**)

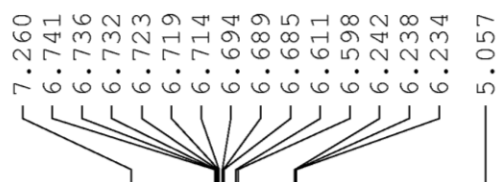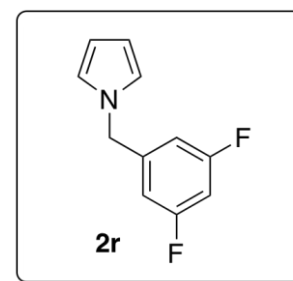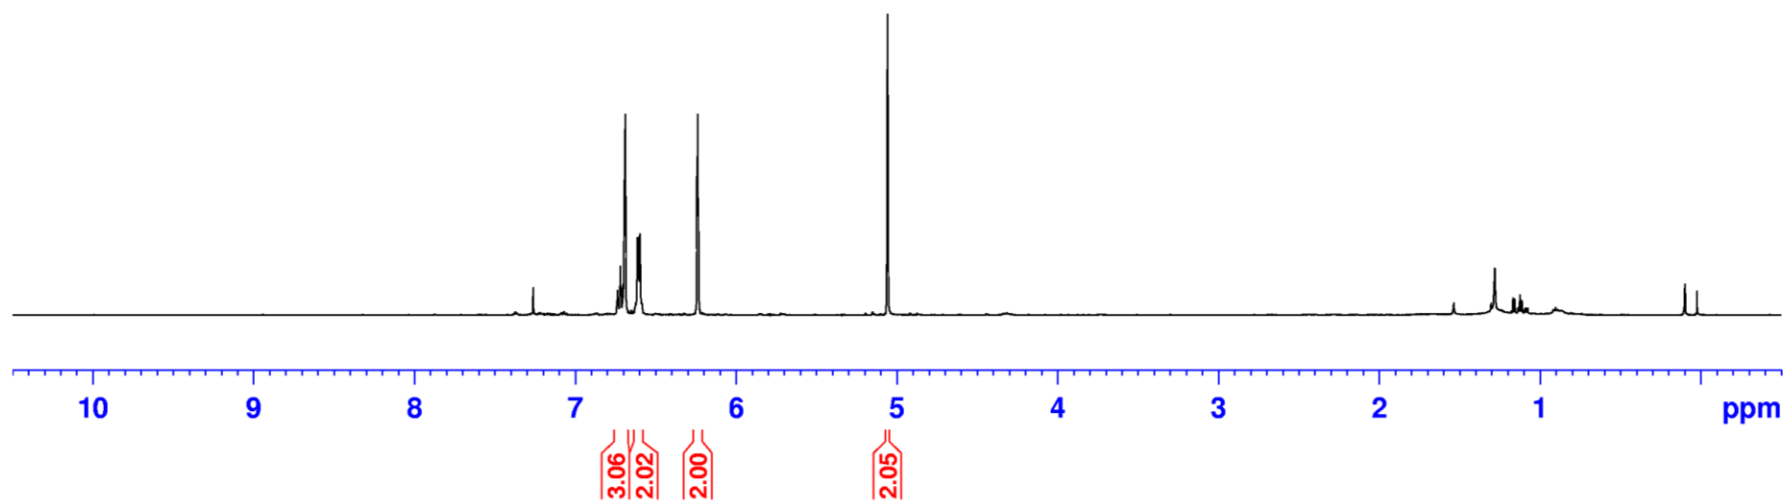

$^{13}\text{C}$  NMR ( $\text{CDCl}_3$ , 125.8 MHz) spectrum of 1-(3,5-difluorobenzyl)-1*H*-pyrrole (**2r**)

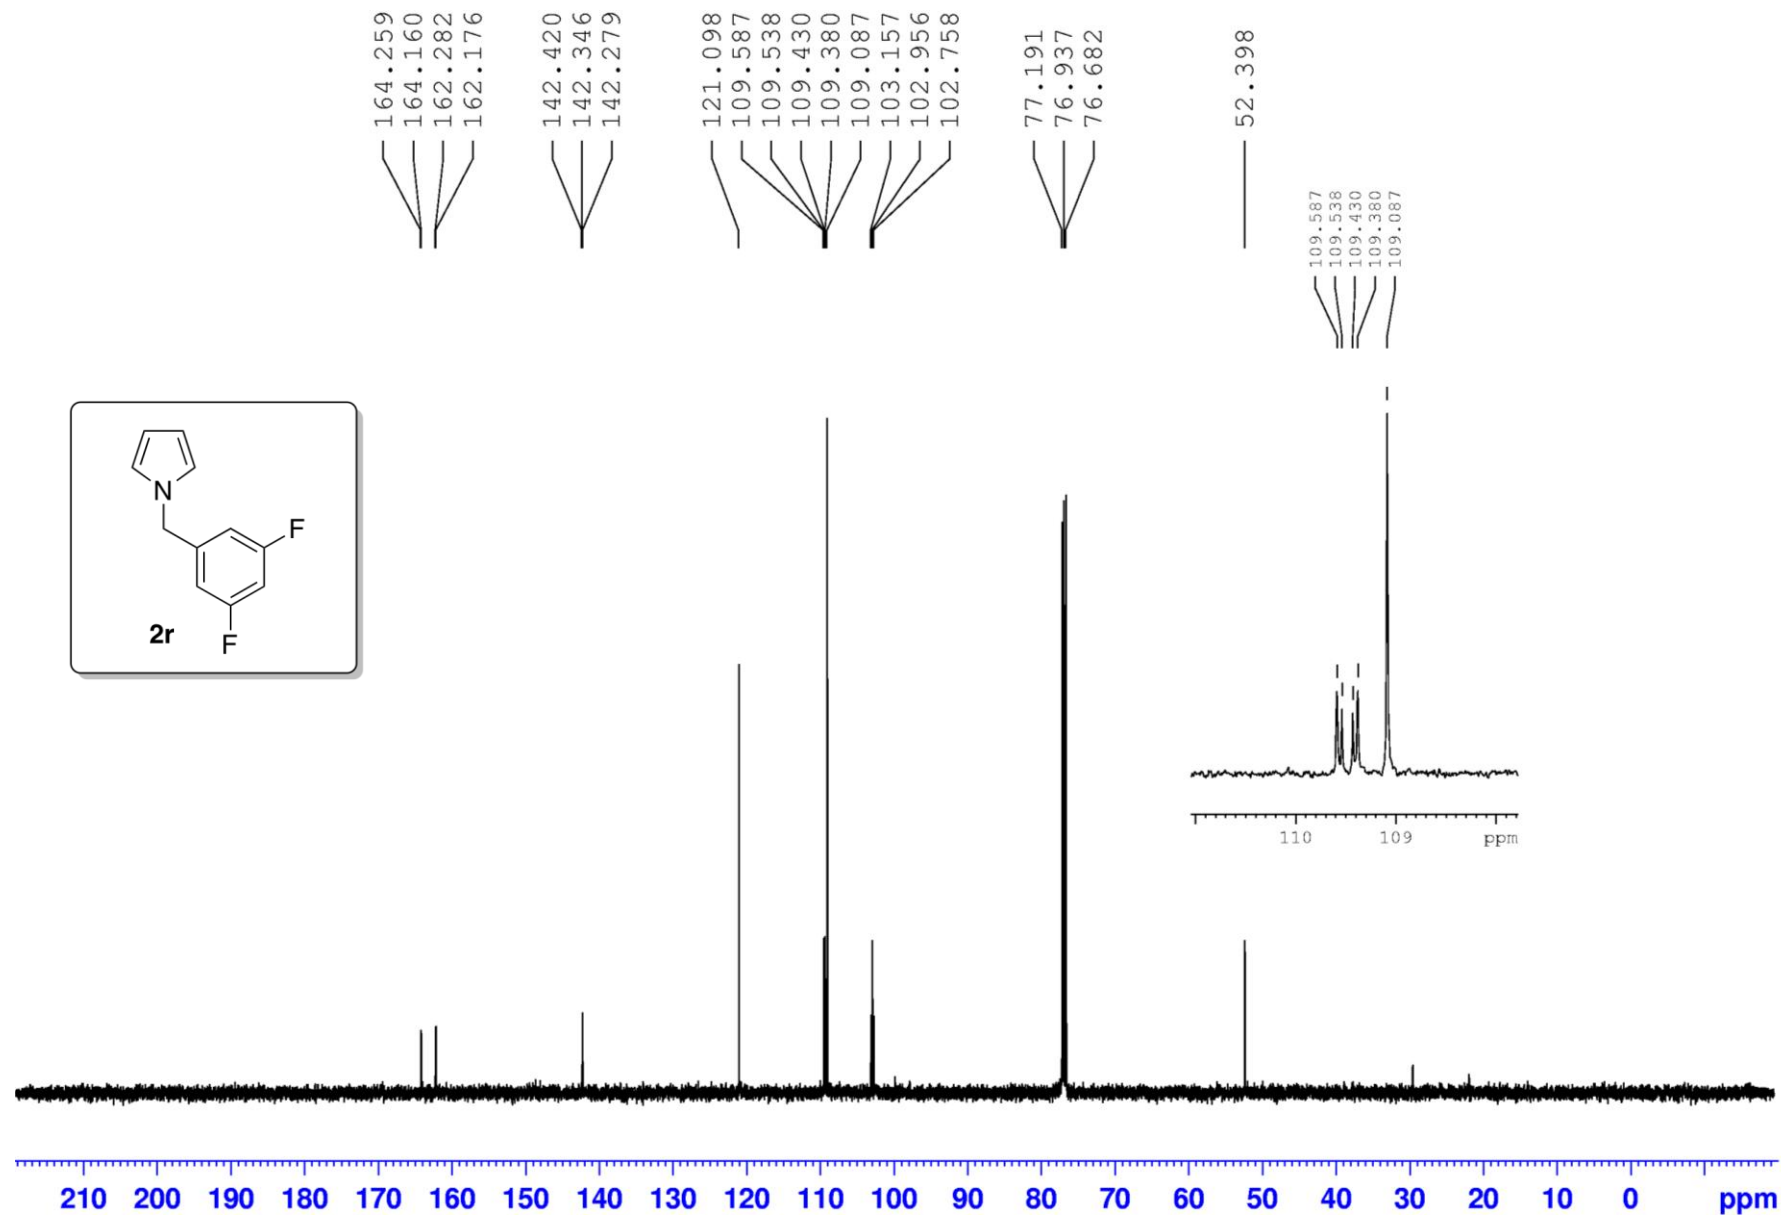

$^{19}\text{F}$  NMR ( $\text{CDCl}_3$ , 470.8 MHz) spectrum of 1-(3,5-difluorobenzyl)-1*H*-pyrrole (**2r**)

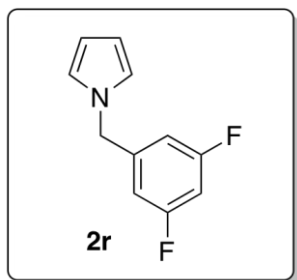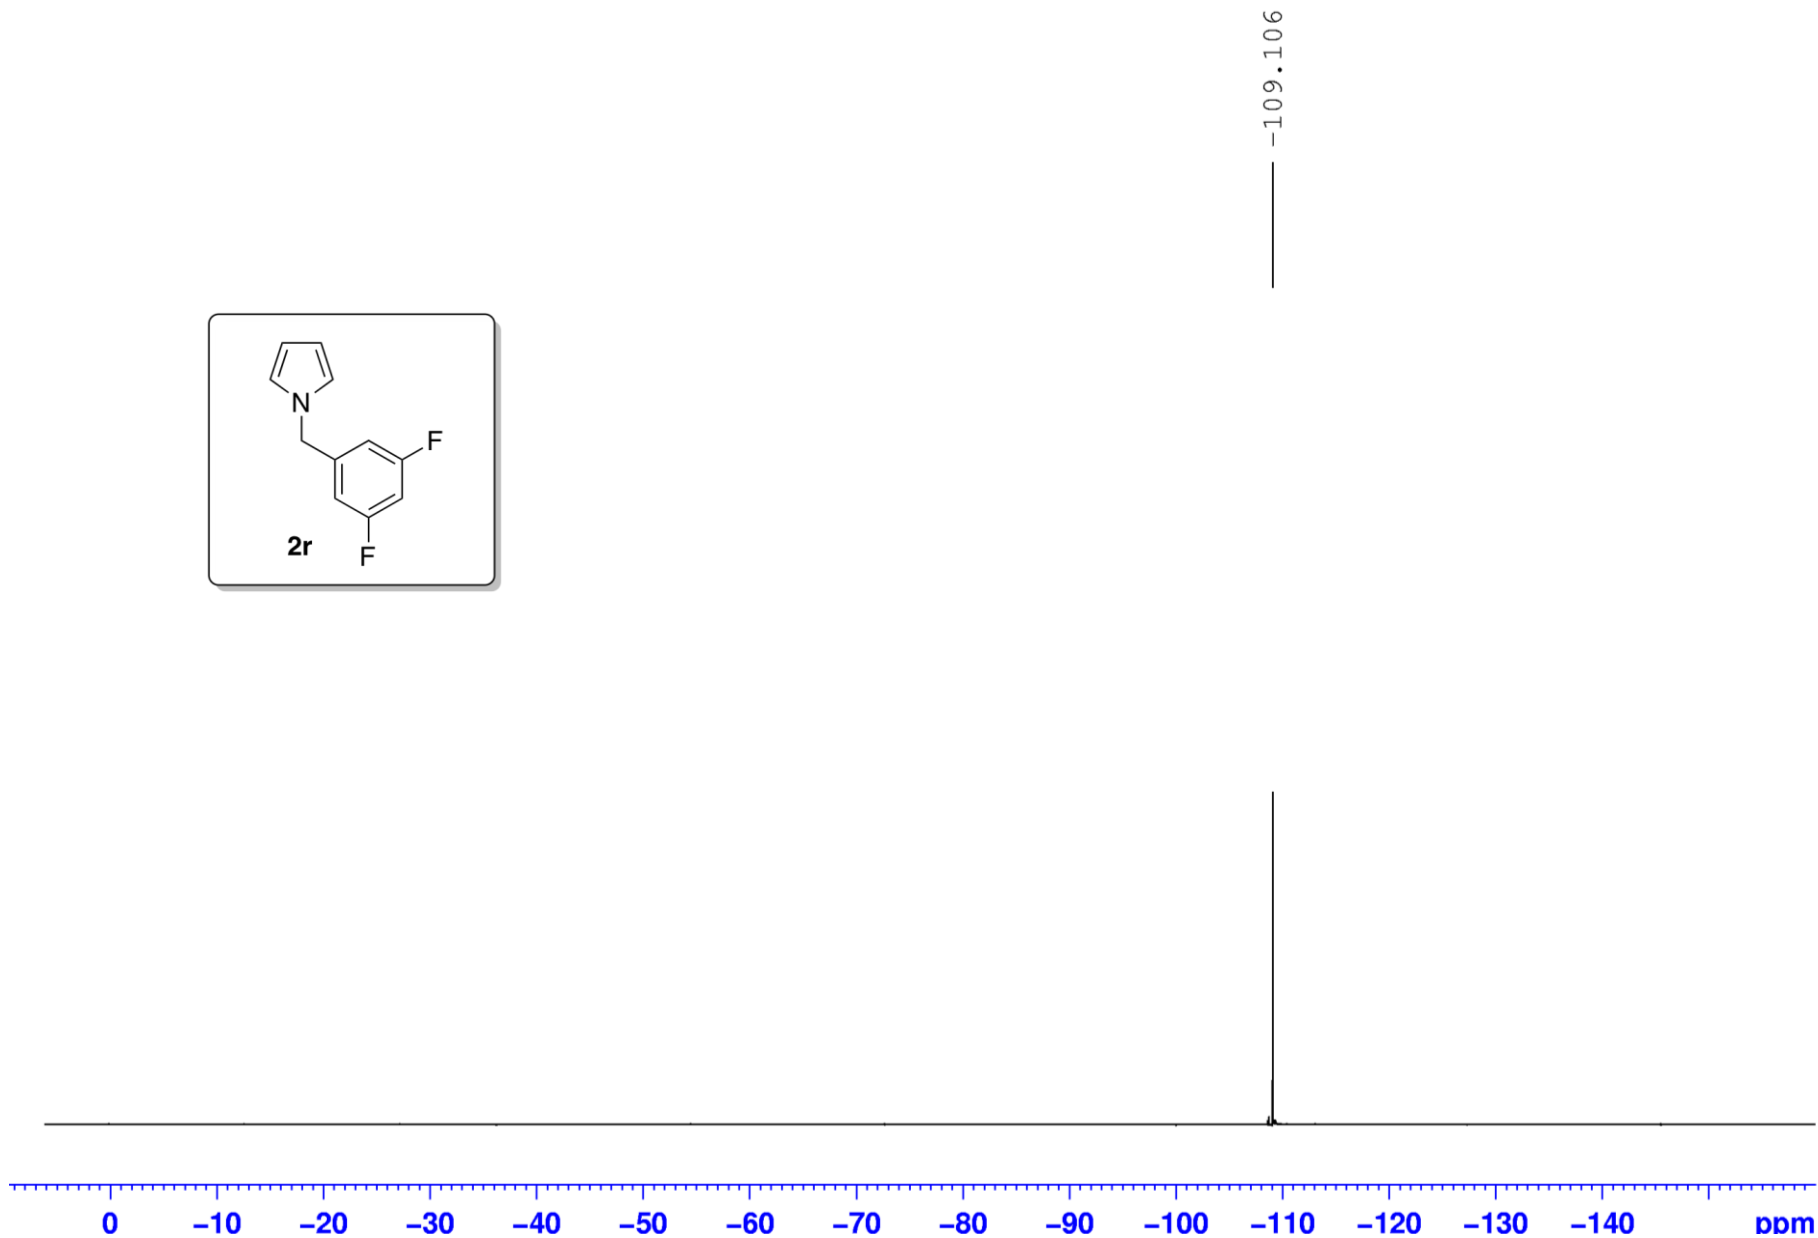

$^1\text{H}$  NMR ( $\text{CDCl}_3$ , 500 MHz) spectrum of 3-((1*H*-pyrrol-1-yl)methyl)pyridine (**2s**)

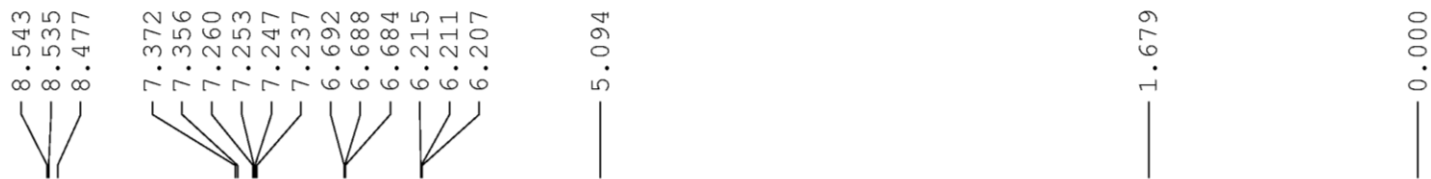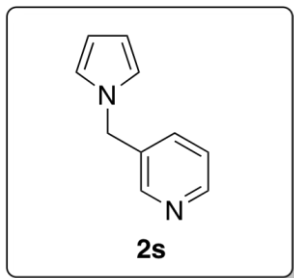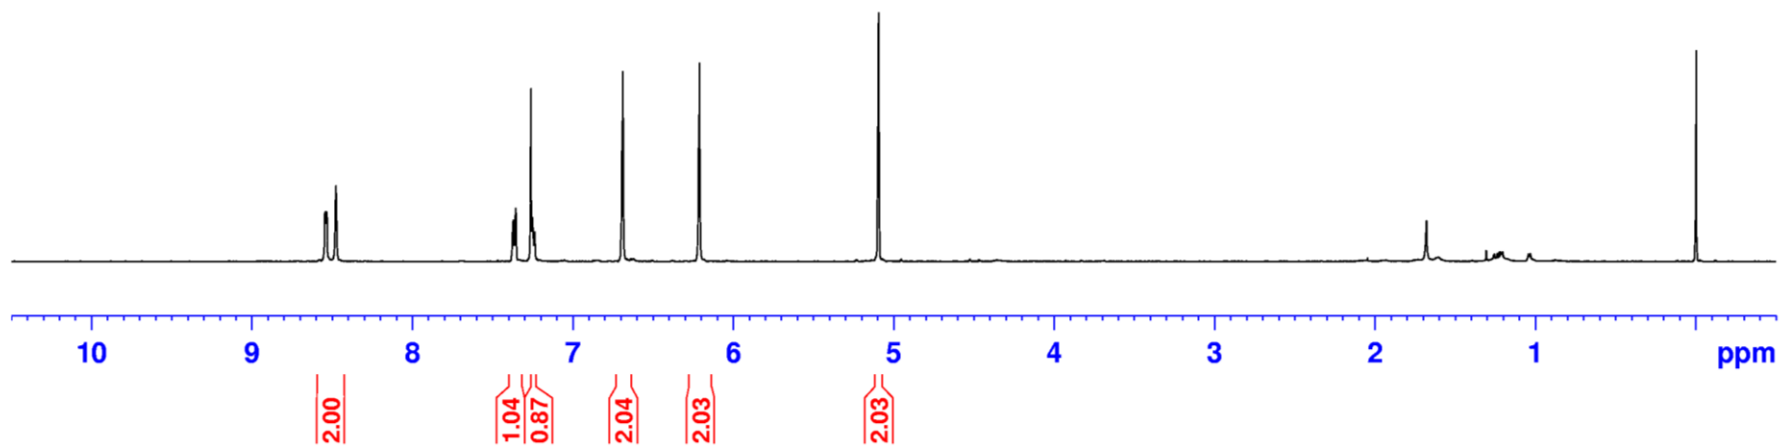

$^{13}\text{C}$  NMR ( $\text{CDCl}_3$ , 400 MHz) spectrum of 3-((1*H*-pyrrol-1-yl)methyl)pyridine (**2s**)

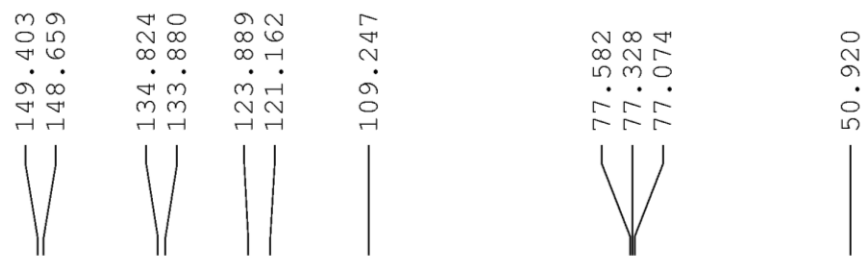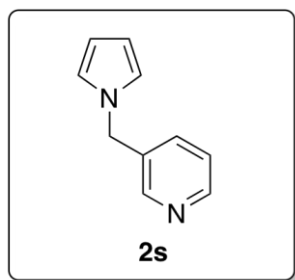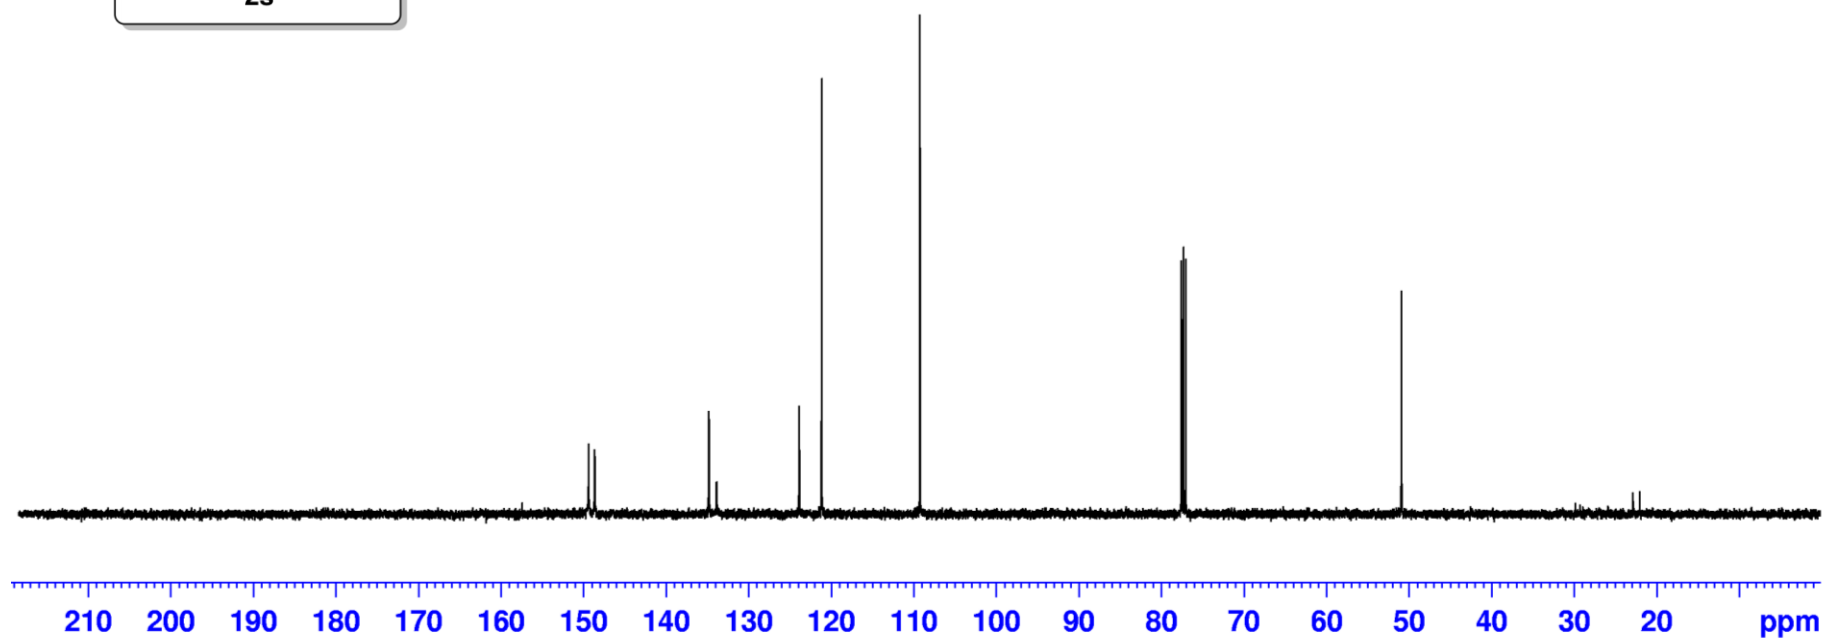

$^1\text{H}$  NMR ( $\text{CDCl}_3$ , 400 MHz) spectrum of 5-((1*H*-pyrrol-1-yl)methyl)-2-methoxypyridine (**2t**)

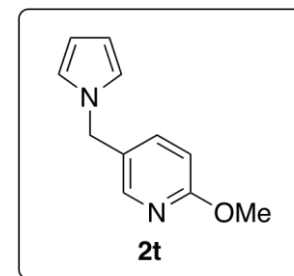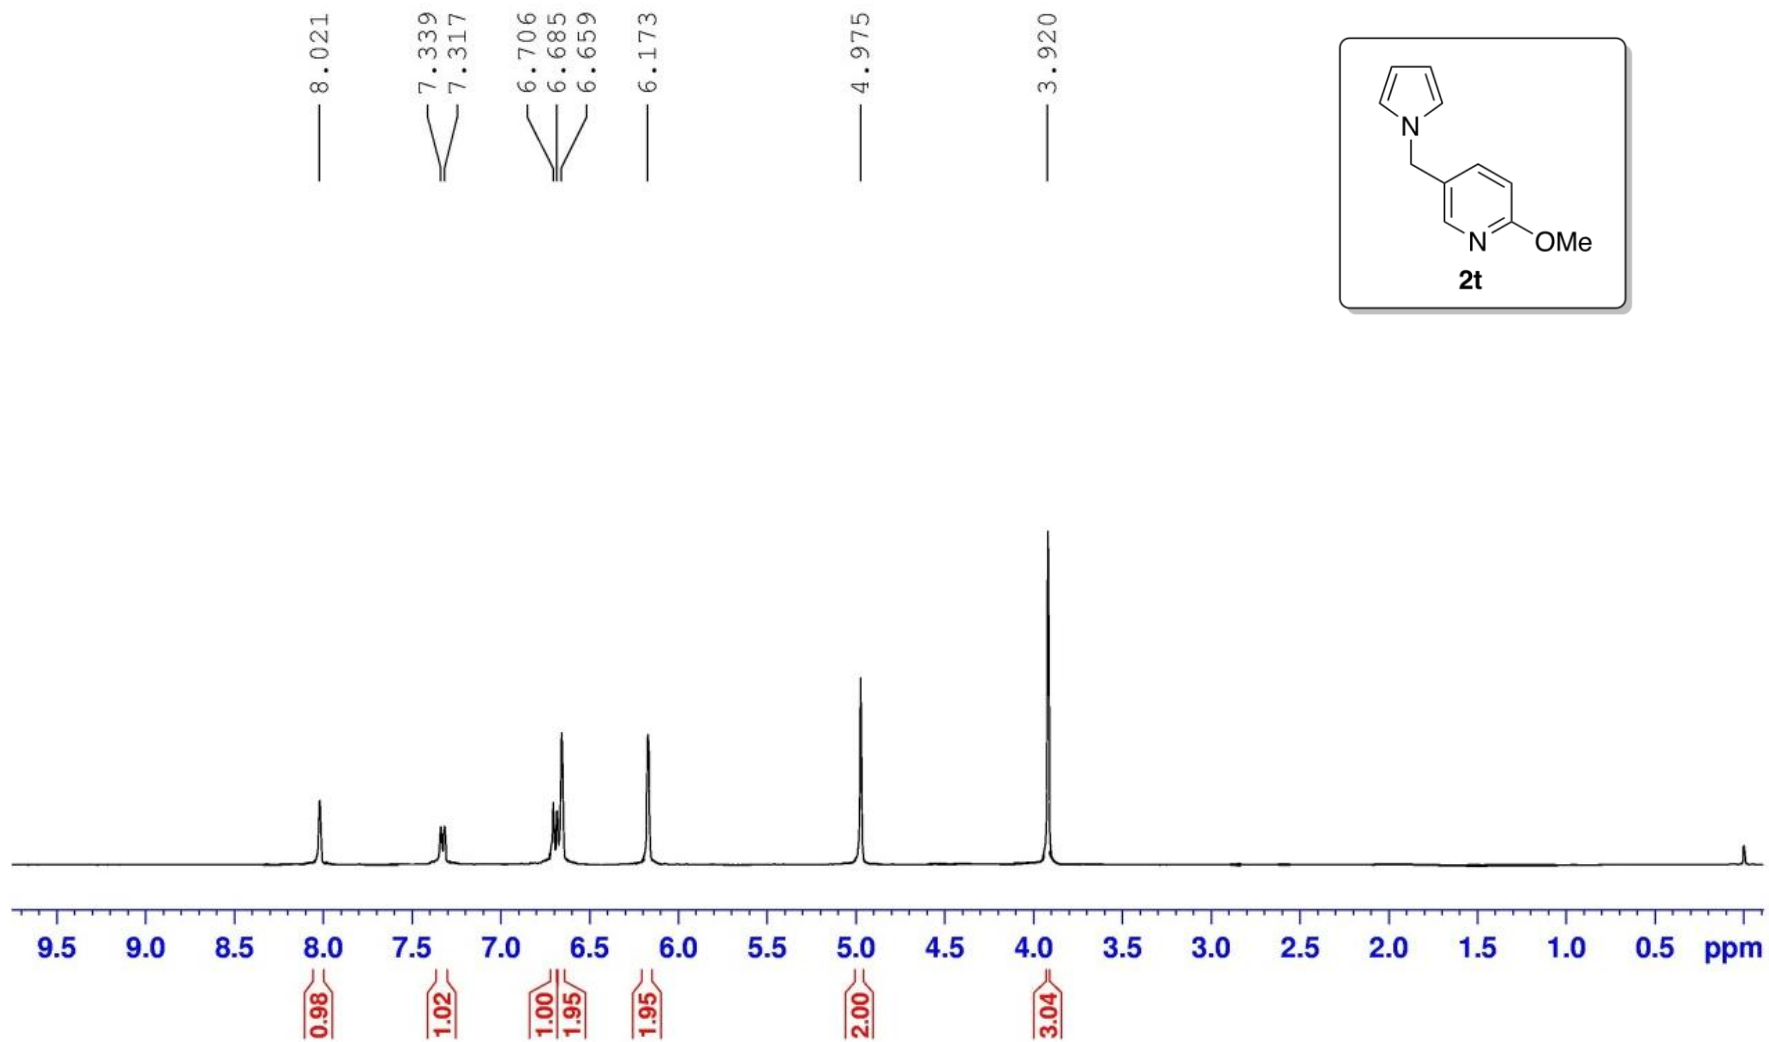

$^{13}\text{C}$  NMR ( $\text{CDCl}_3$ , 100 MHz) spectrum of 5-((1*H*-pyrrol-1-yl)methyl)-2-methoxypyridine (**2t**)

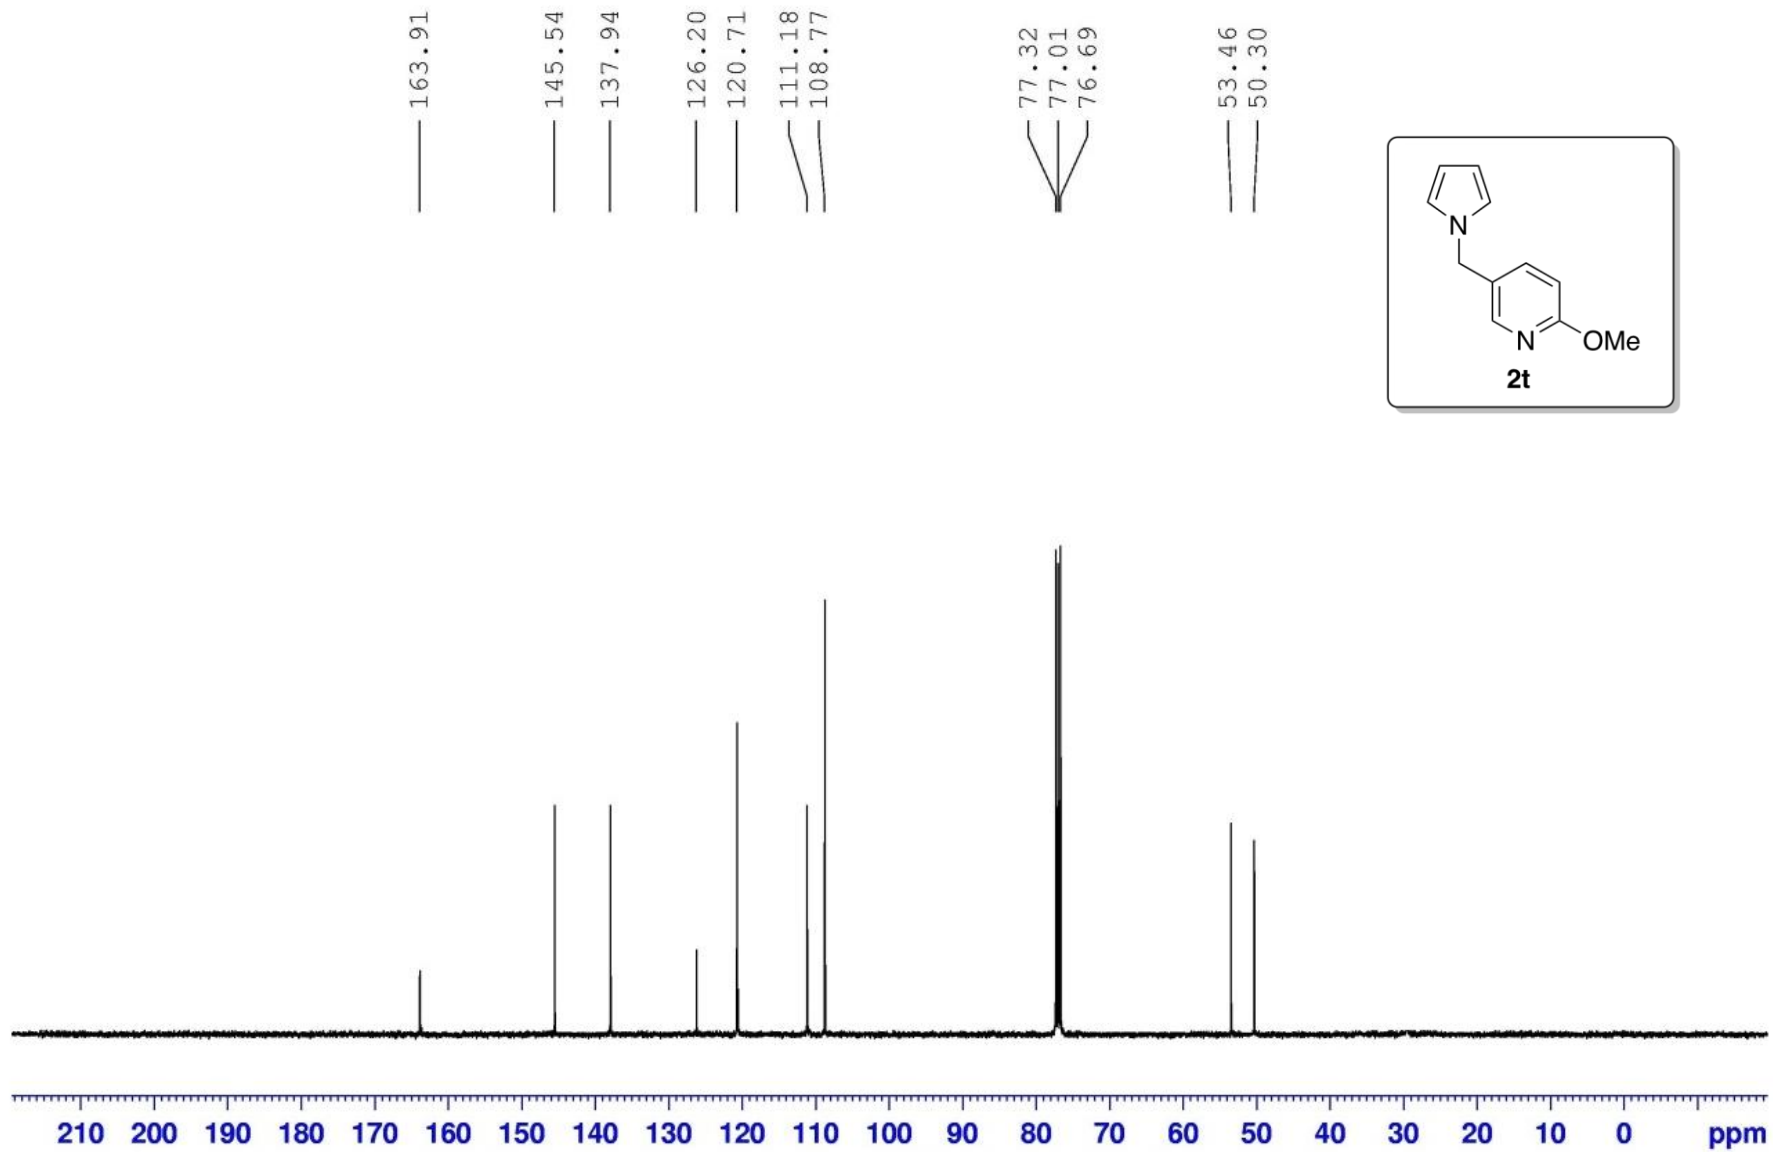



$^1\text{H}$  NMR ( $\text{CDCl}_3$ , 400 MHz) spectrum of 1-(5-((1*H*-pyrrol-1-yl)methyl)thiophen-2-yl)ethanone (**2u**)

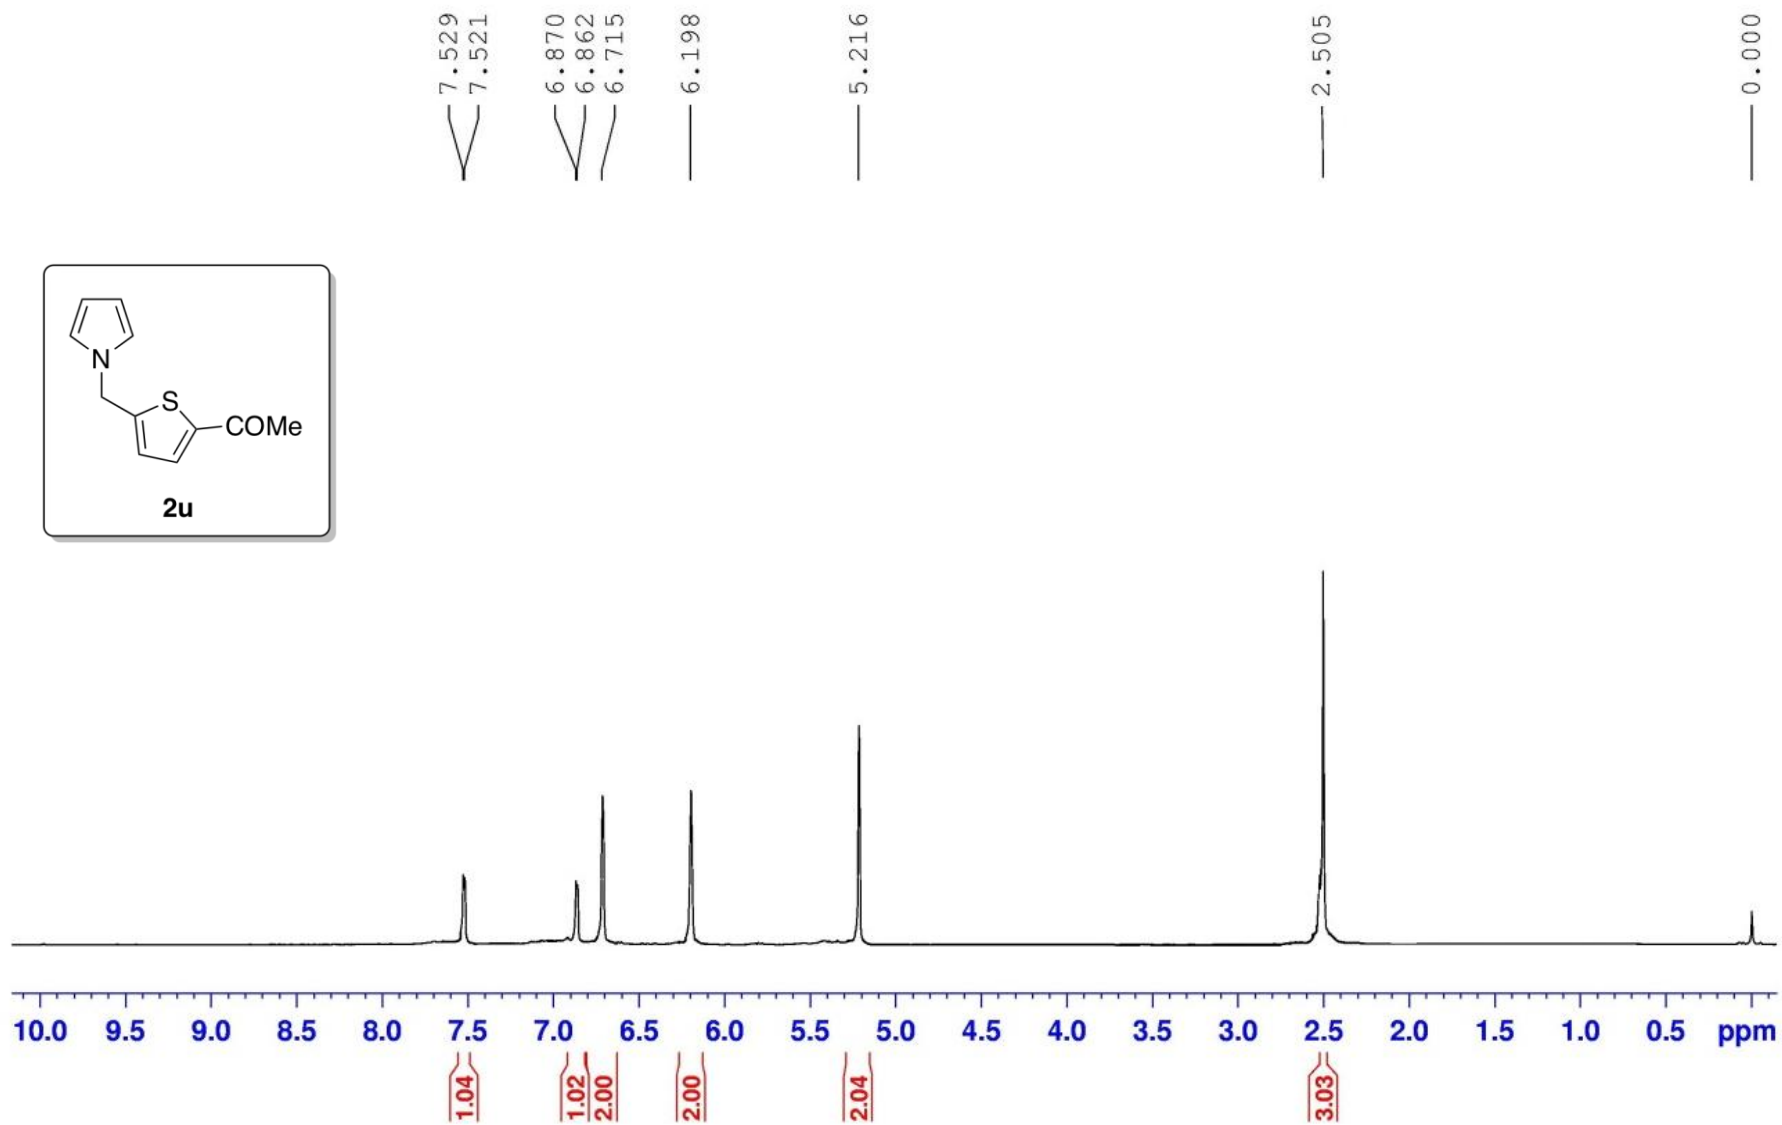

$^{13}\text{C}$  NMR ( $\text{CDCl}_3$ , 100 MHz) spectrum of 1-(5-((1*H*-pyrrol-1-yl)methyl)thiophen-2-yl)ethanone (**2u**)

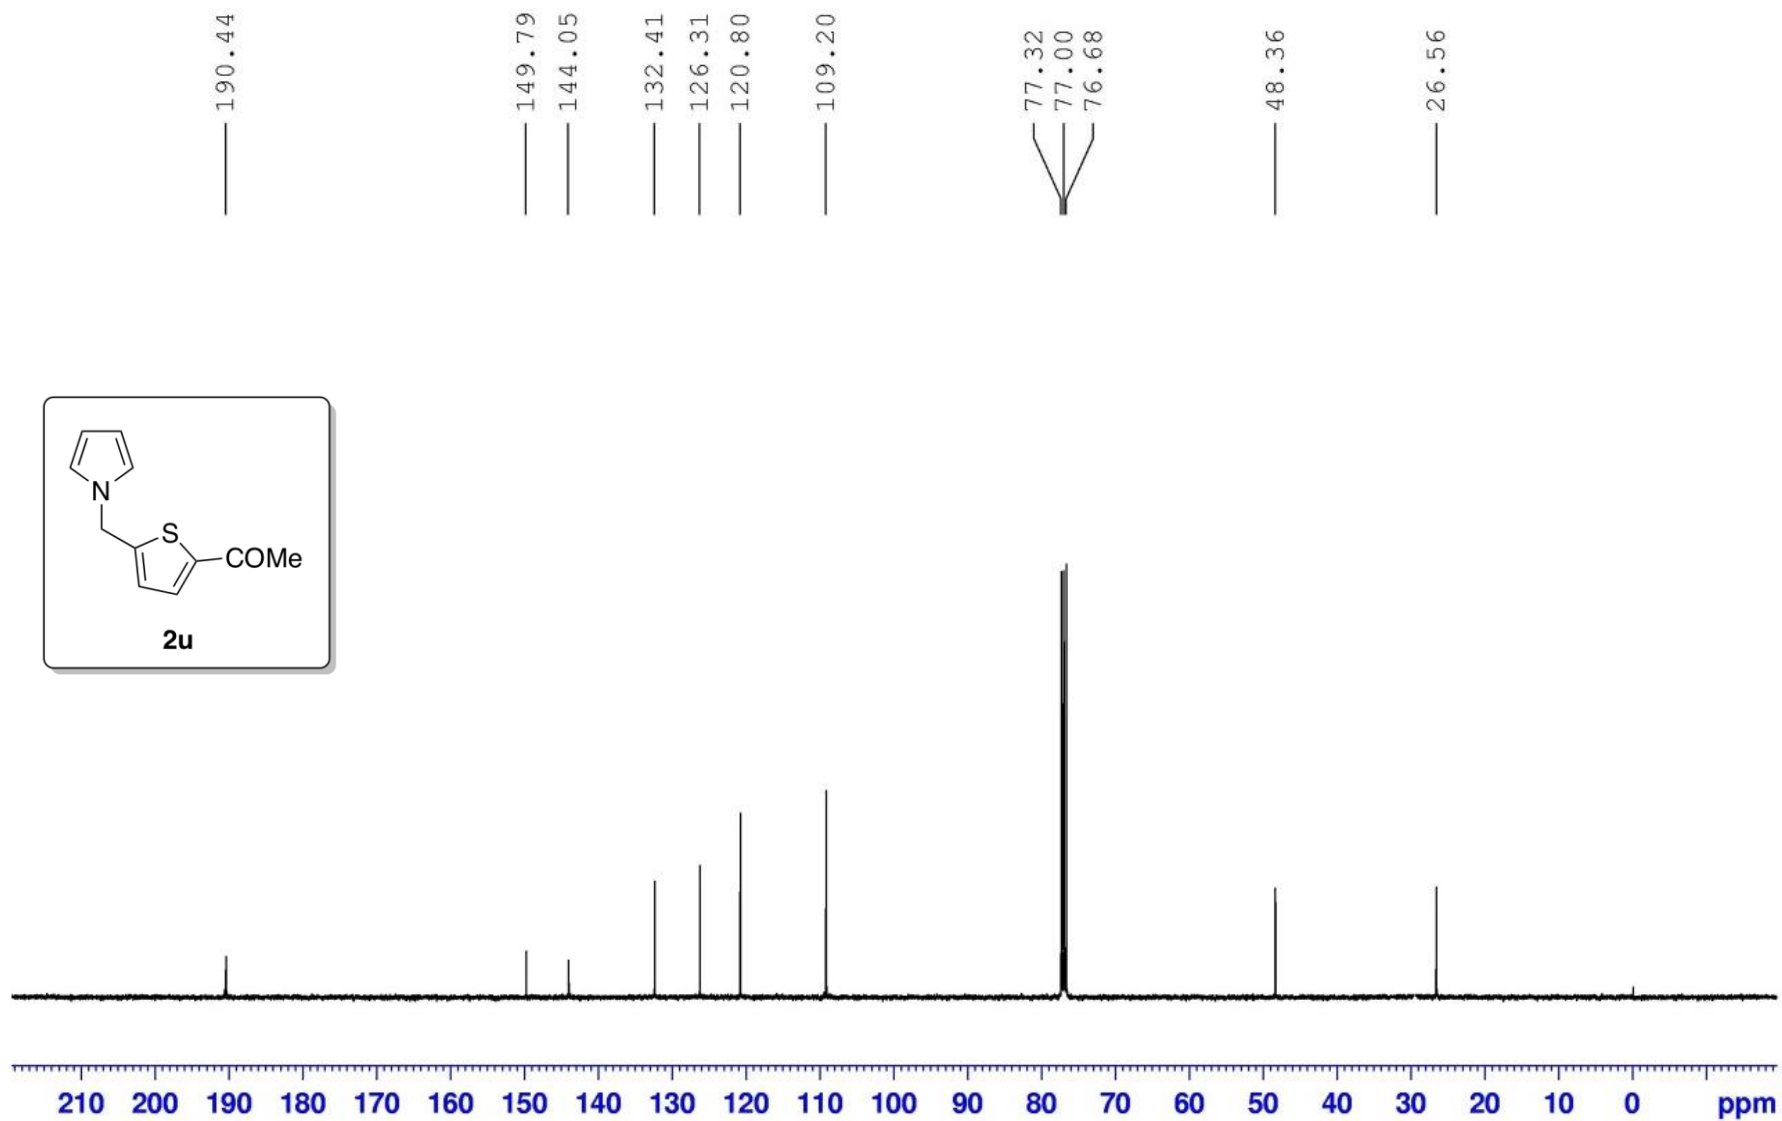

$^1\text{H}$  NMR ( $\text{CDCl}_3$ , 500 MHz) spectrum of 6-((1*H*-pyrrol-1-yl)methyl)quinoline (**2v**)

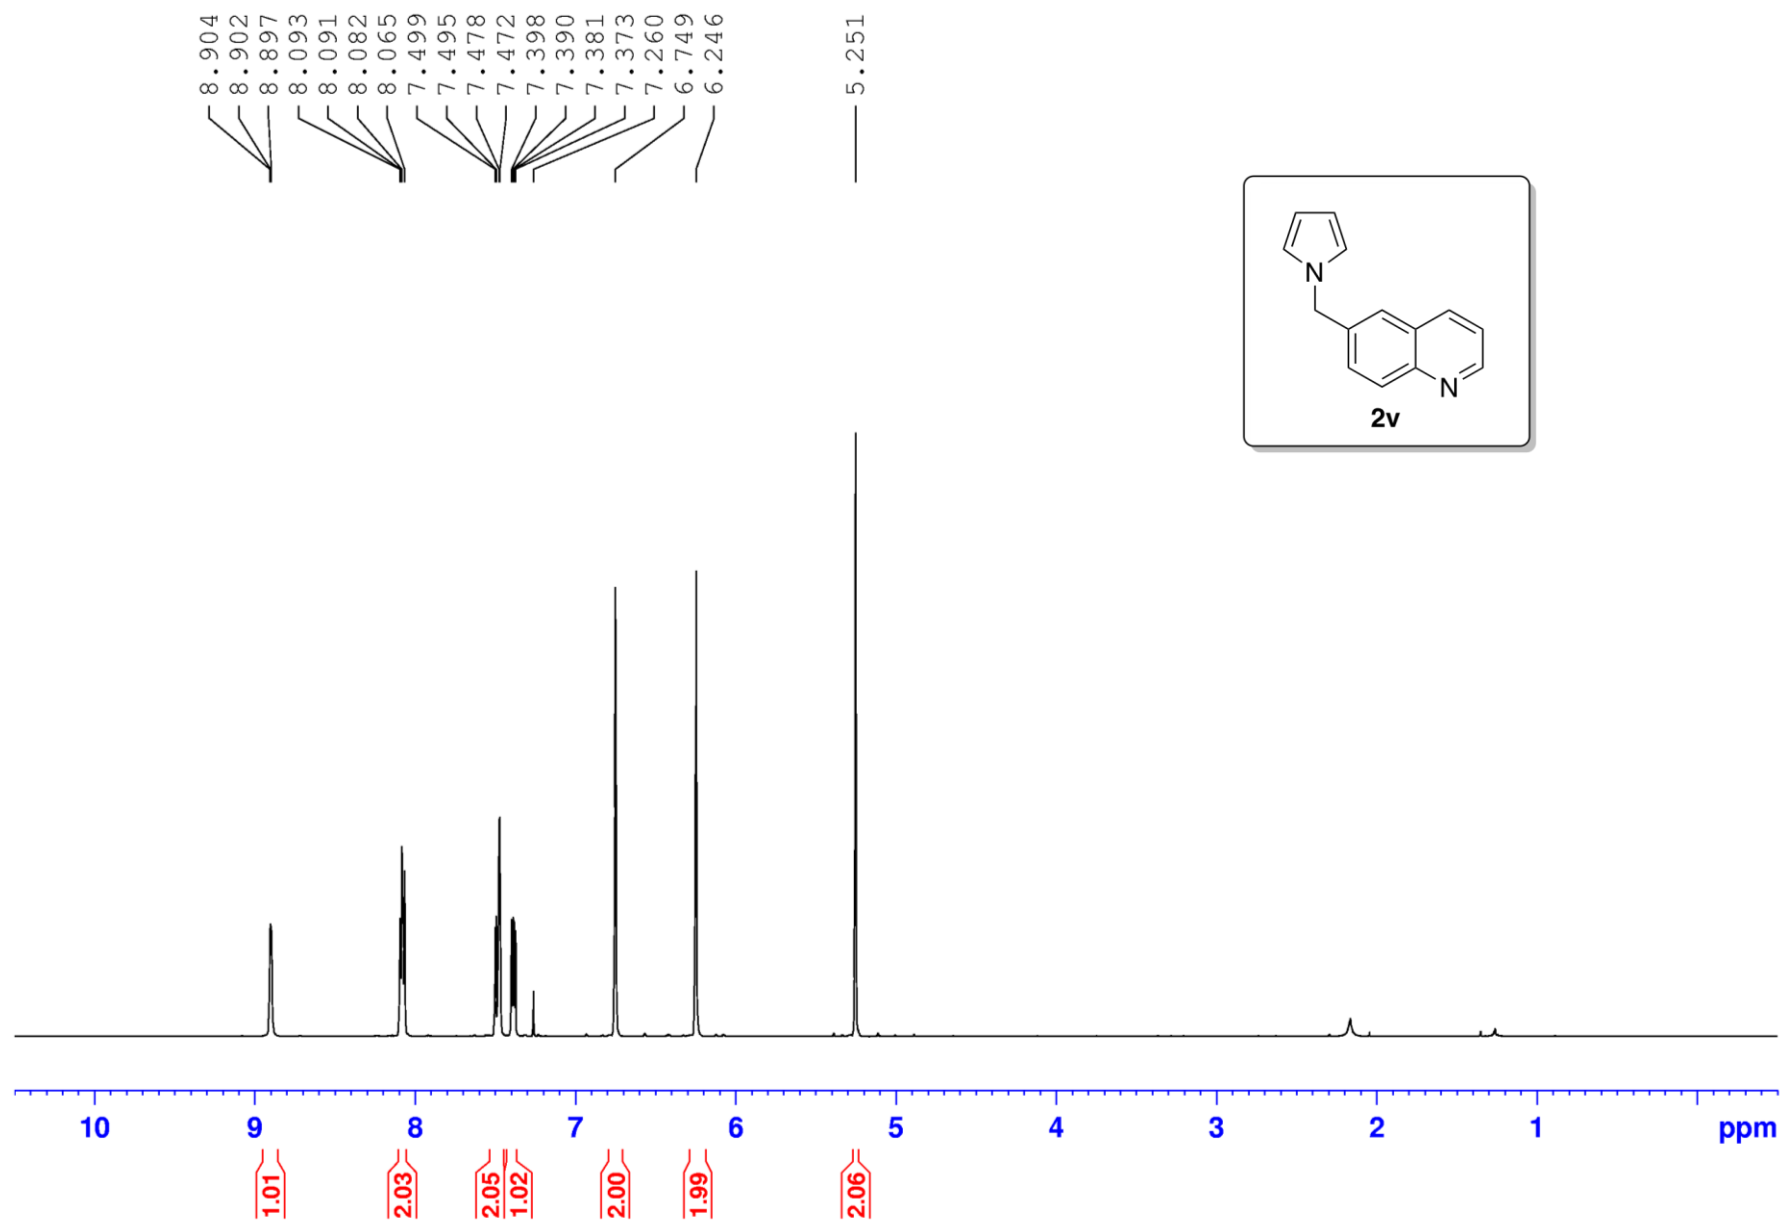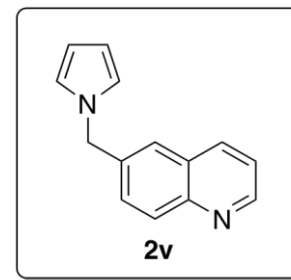

$^{13}\text{C}$  NMR ( $\text{CDCl}_3$ , 125.8 MHz) spectrum of 6-((1*H*-pyrrol-1-yl)methyl)quinoline (**2v**)

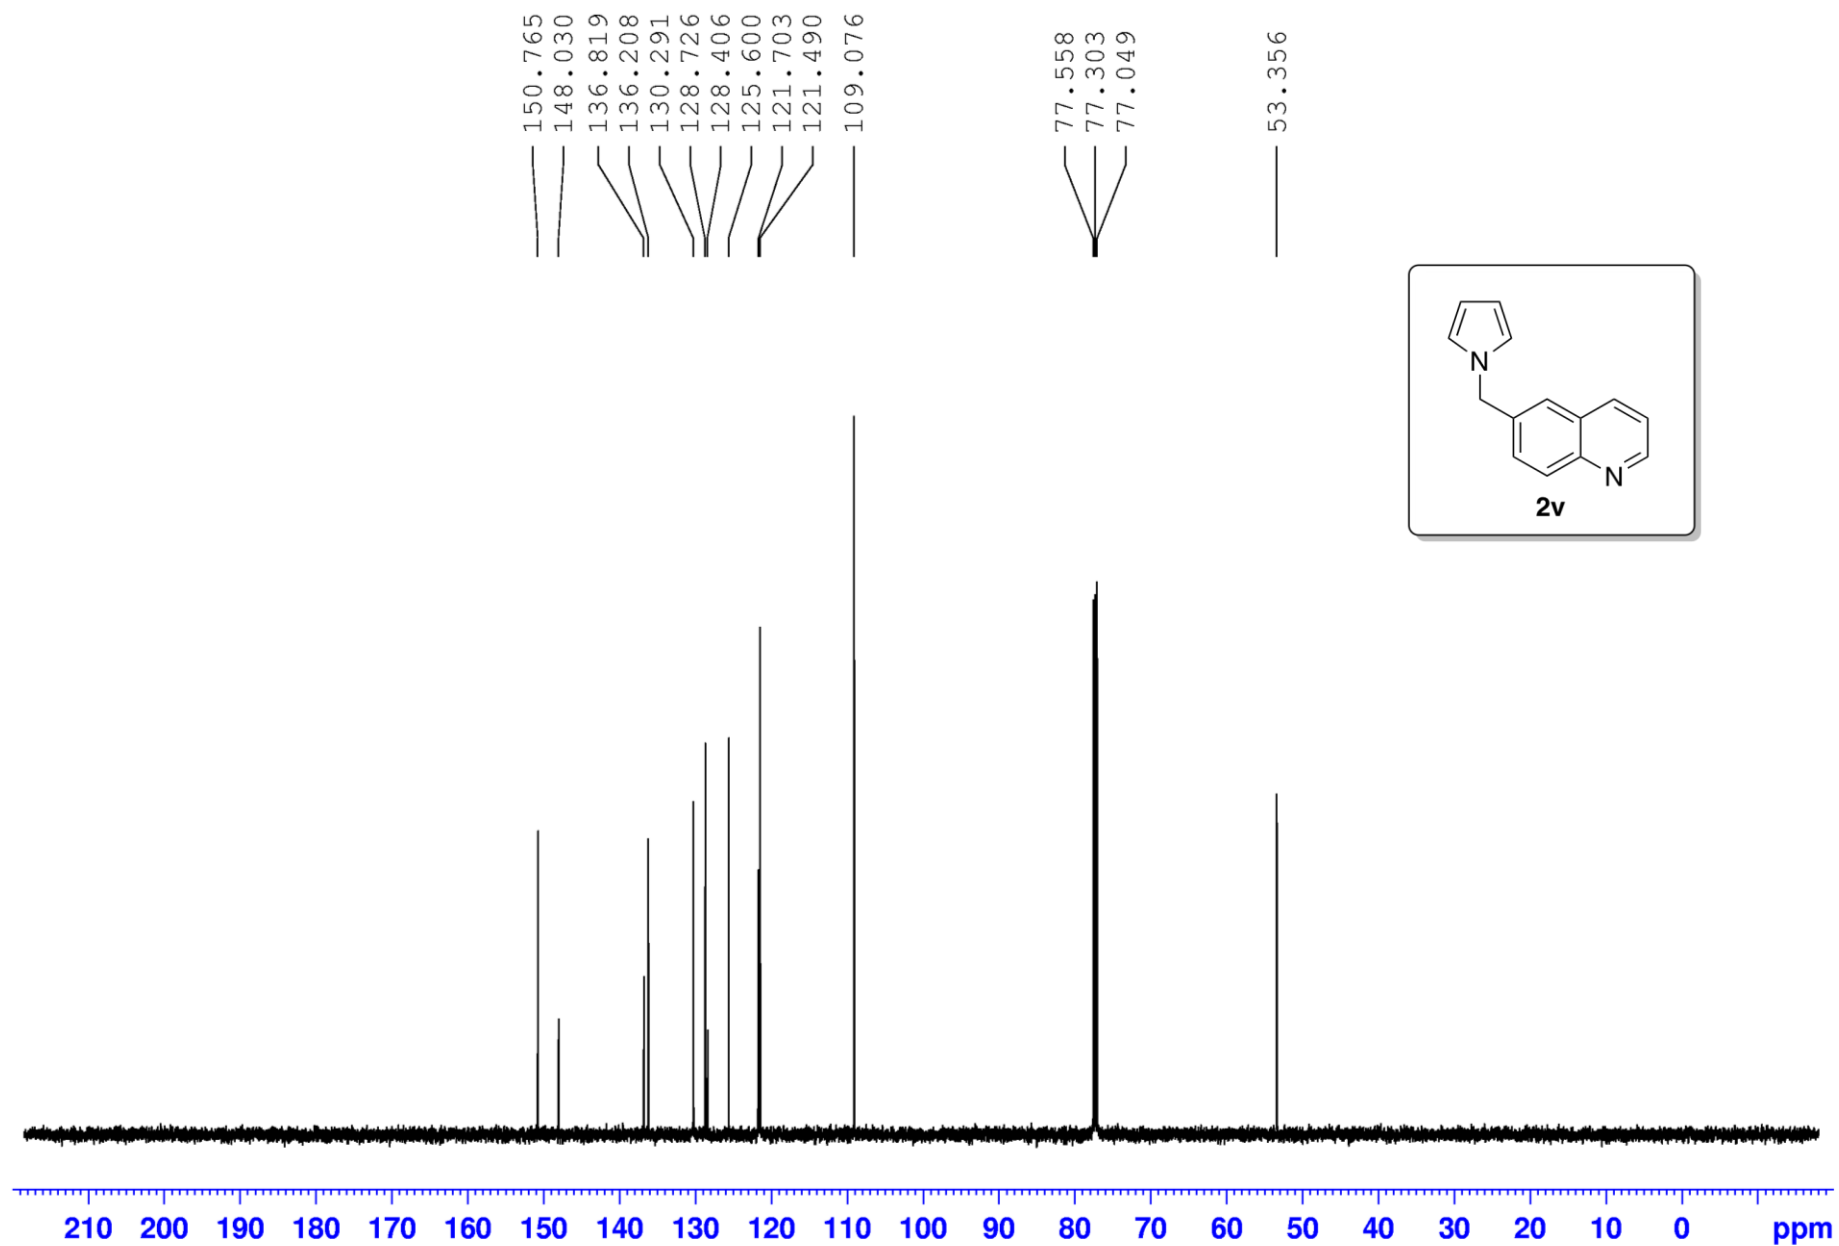

$^1\text{H}$  NMR ( $\text{CDCl}_3$ , 500 MHz) spectrum of 1-(4-(methoxy)benzyl)-1*H*-pyrazole (**3a**)

7.523  
7.329  
7.326  
7.259  
7.168  
7.151  
6.864  
6.847  
6.240  
6.237  
5.222  
3.756

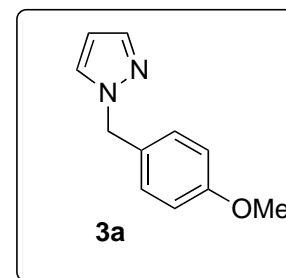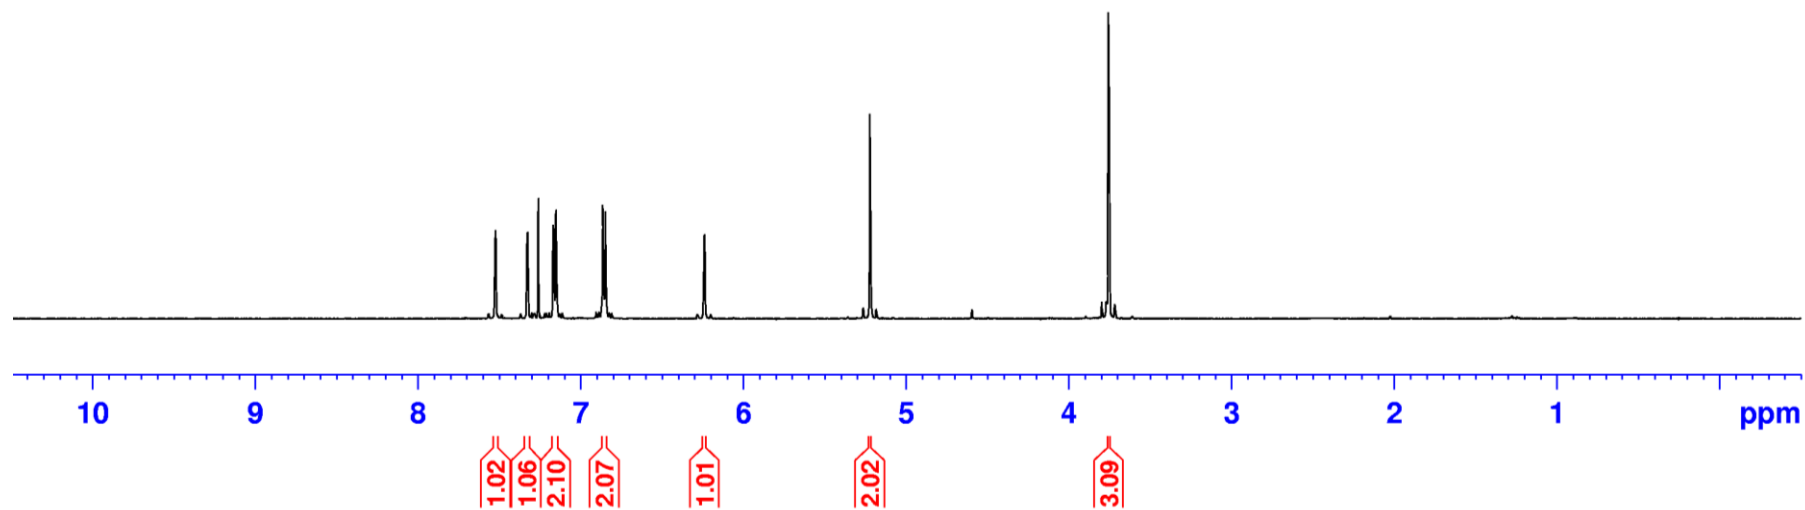

$^{13}\text{C}$  NMR ( $\text{CDCl}_3$ , 125.8 MHz) spectrum of 1-(4-(methoxy)benzyl)-1H-pyrazole (**3a**)

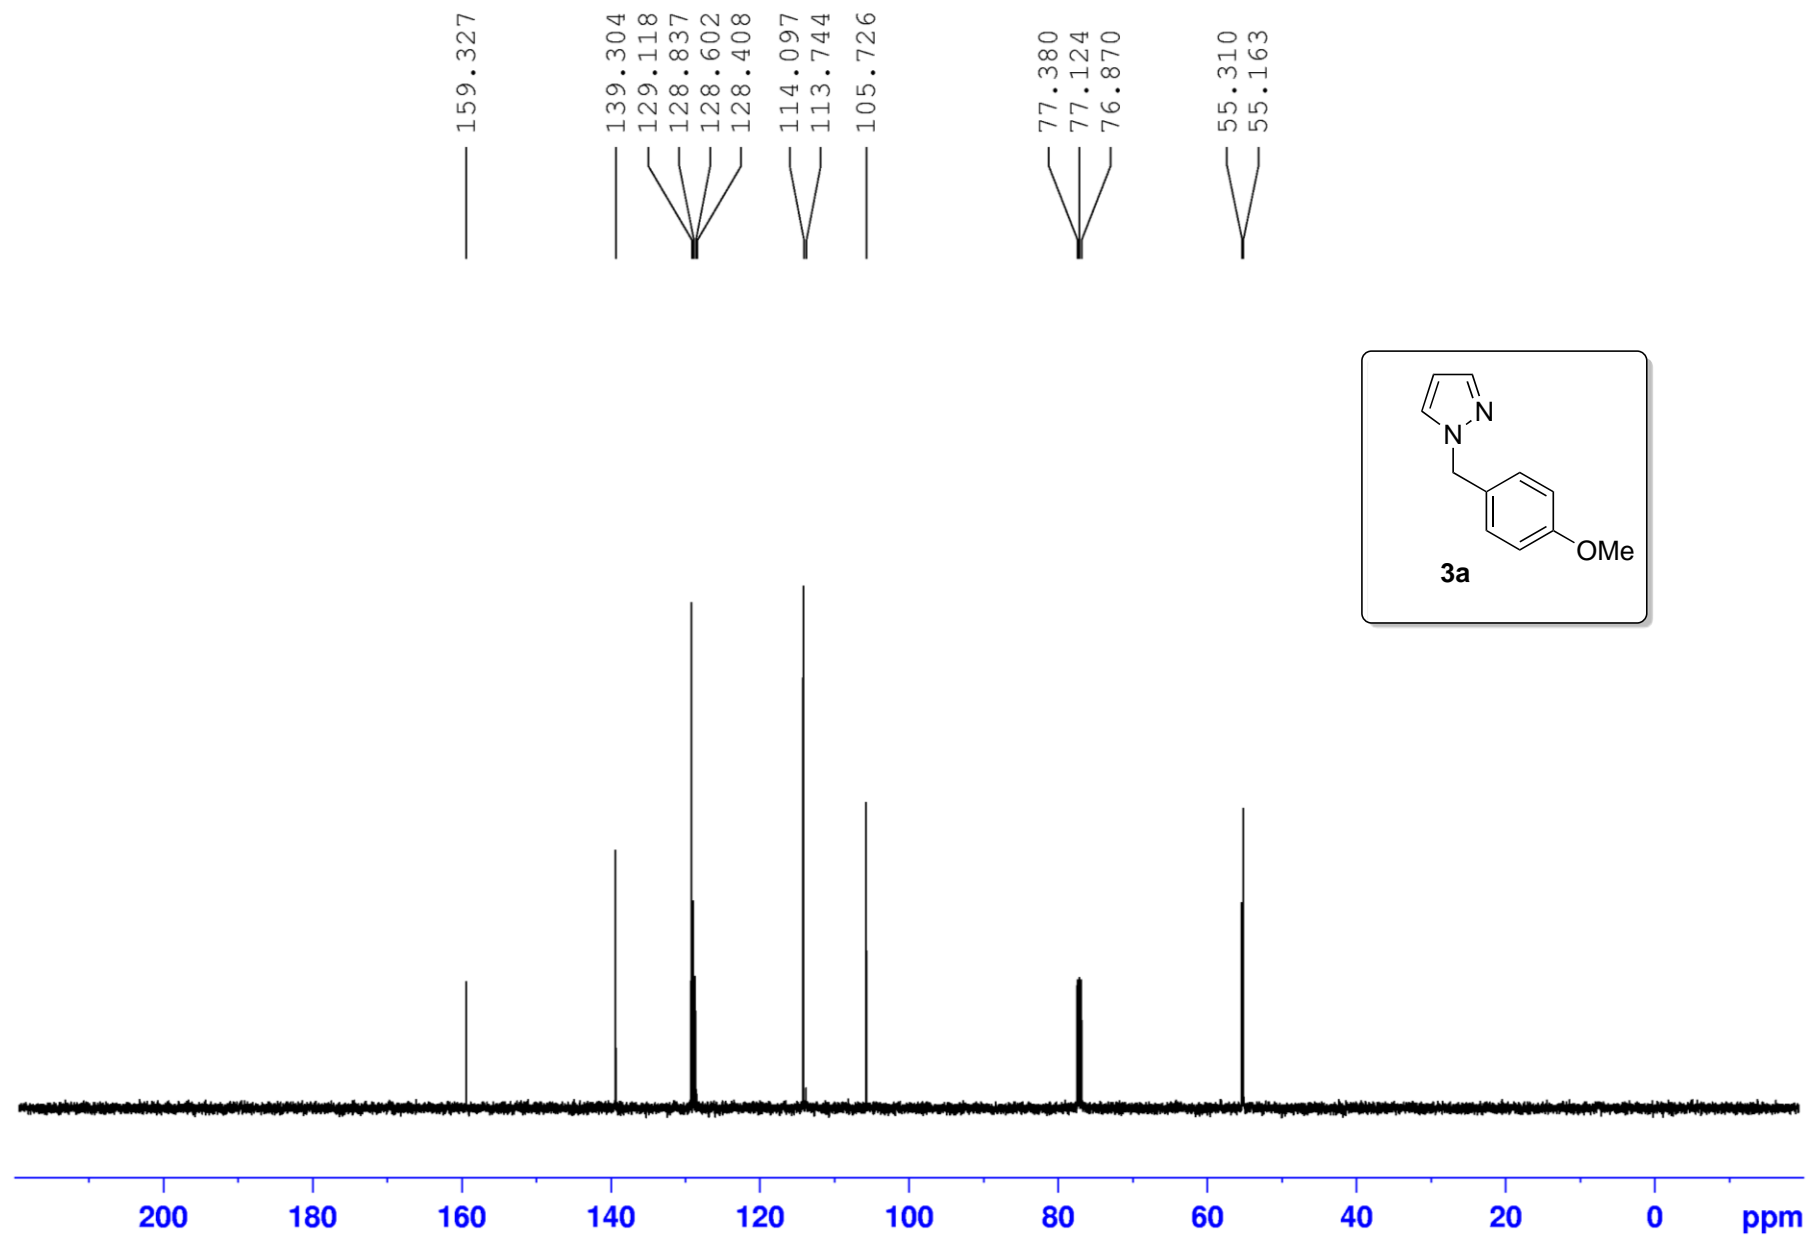

$^1\text{H}$  NMR ( $\text{CDCl}_3$ , 500 MHz) spectrum of 1-(4-(cyano)benzyl)-1*H*-pyrazole (**3b**)

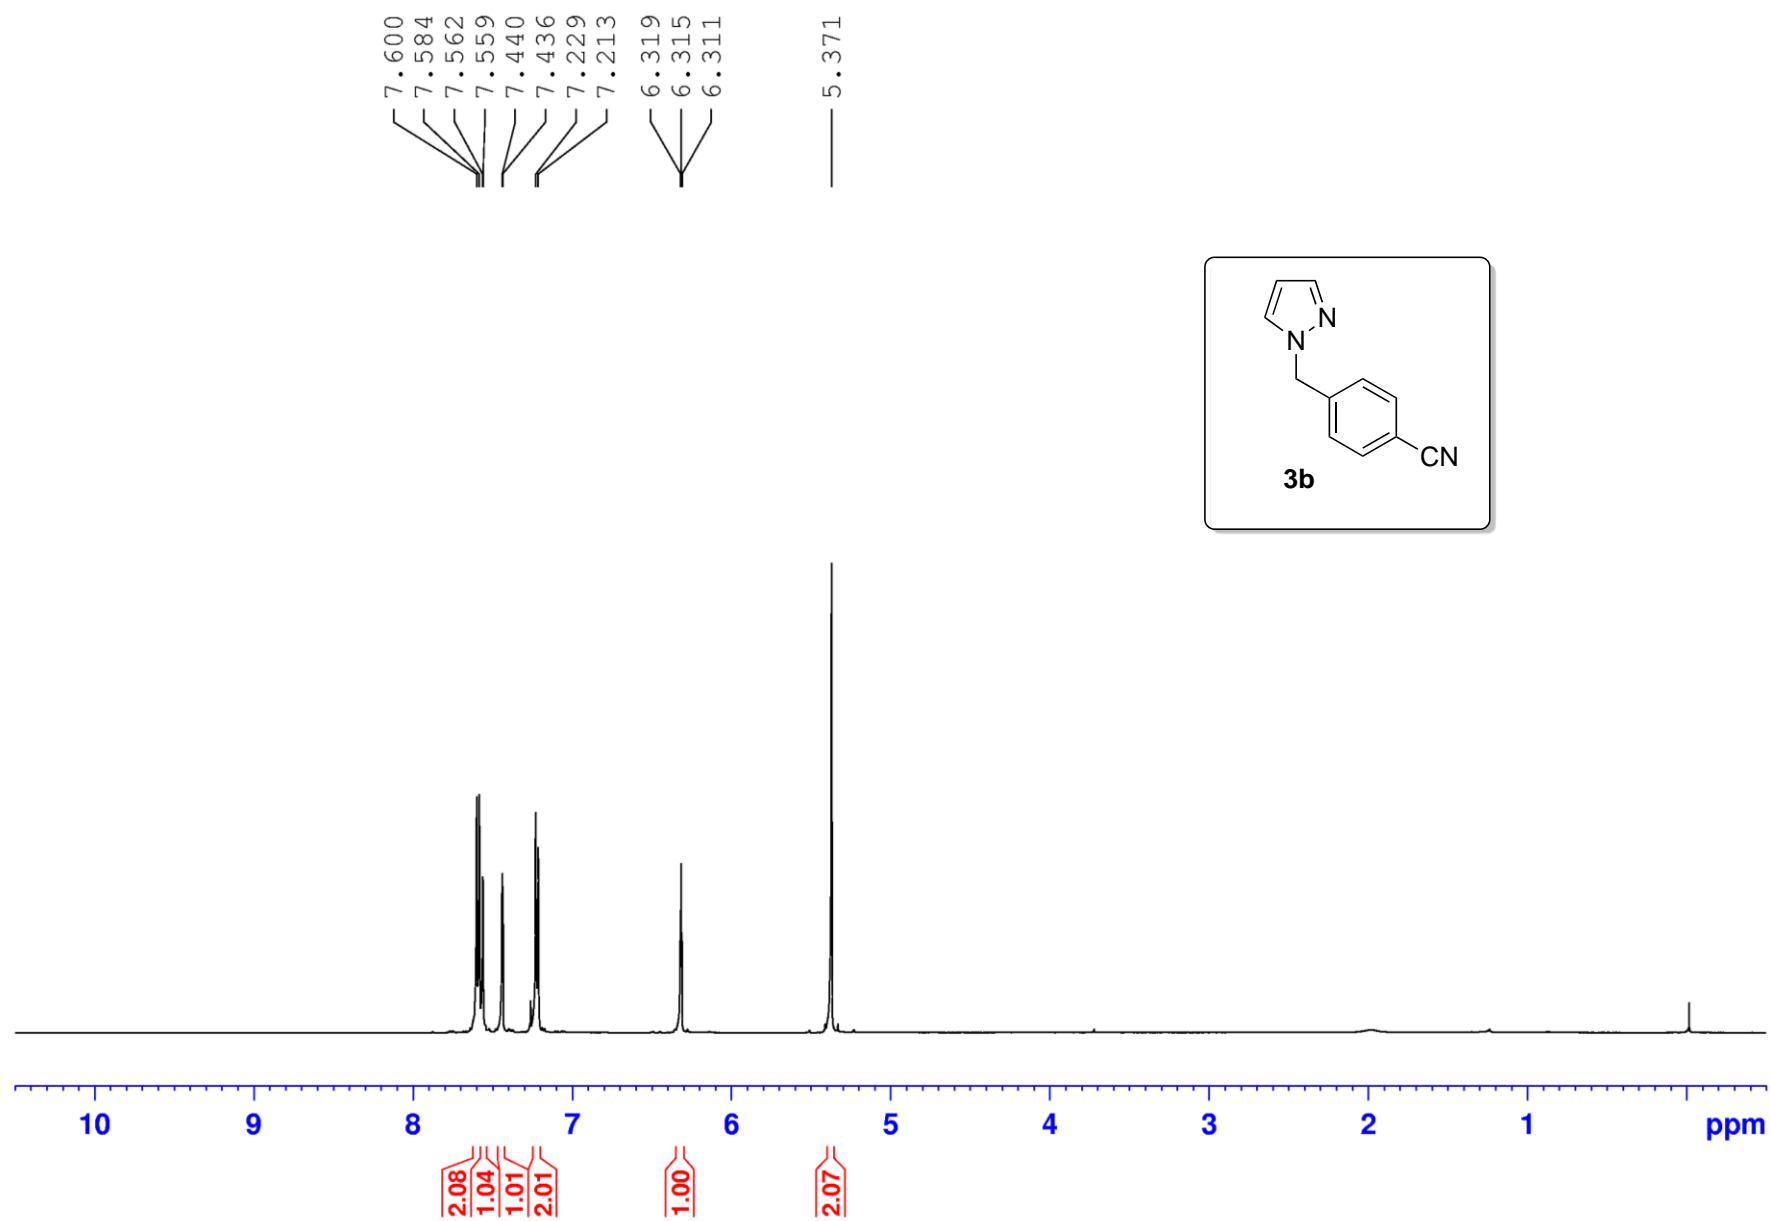

$^{13}\text{C}$  NMR ( $\text{CDCl}_3$ , 125.8 MHz) spectrum of 1-(4-(methoxy)benzyl)-1*H*-pyrazole (**3b**)

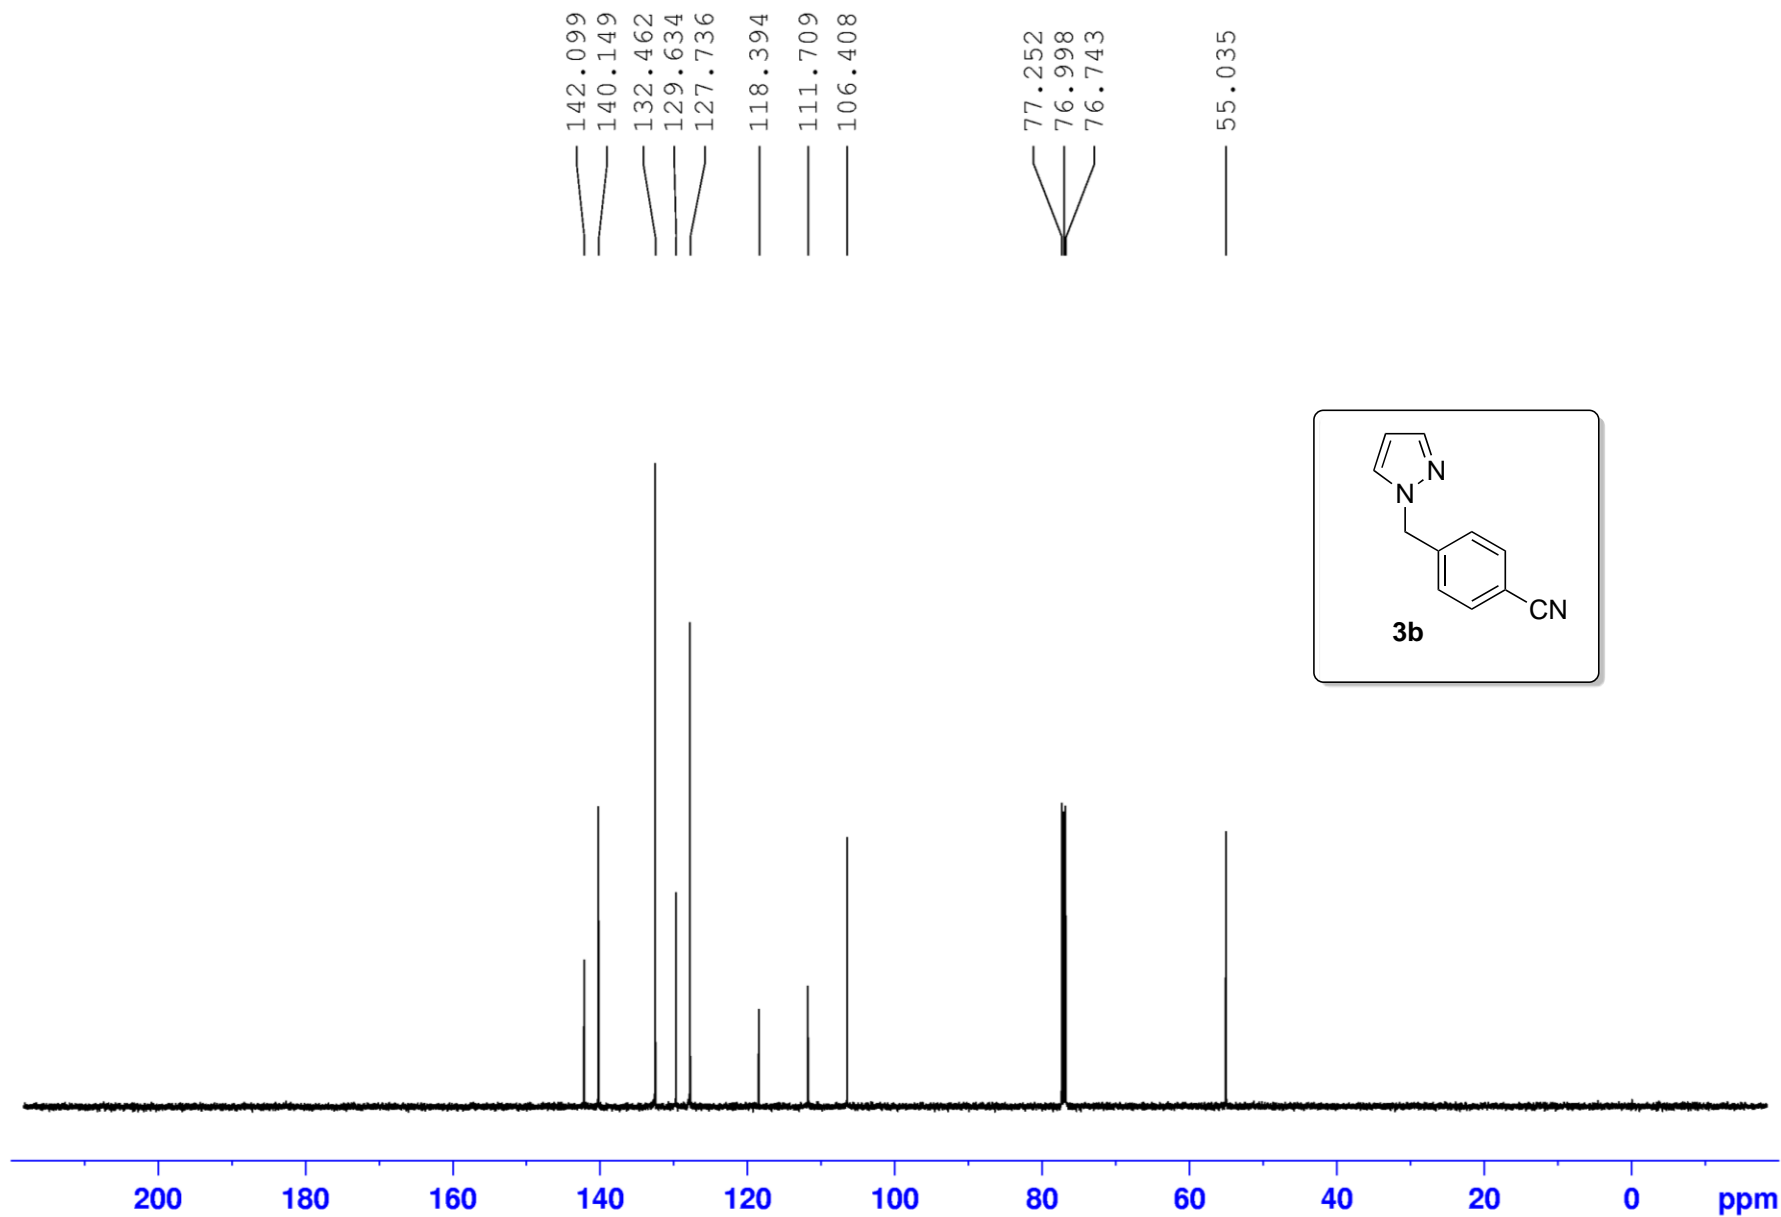



$^1\text{H}$  NMR ( $\text{CDCl}_3$ , 500 MHz) spectrum of 1-(4-(nitro)benzyl)-1*H*-pyrazole (**3c**)

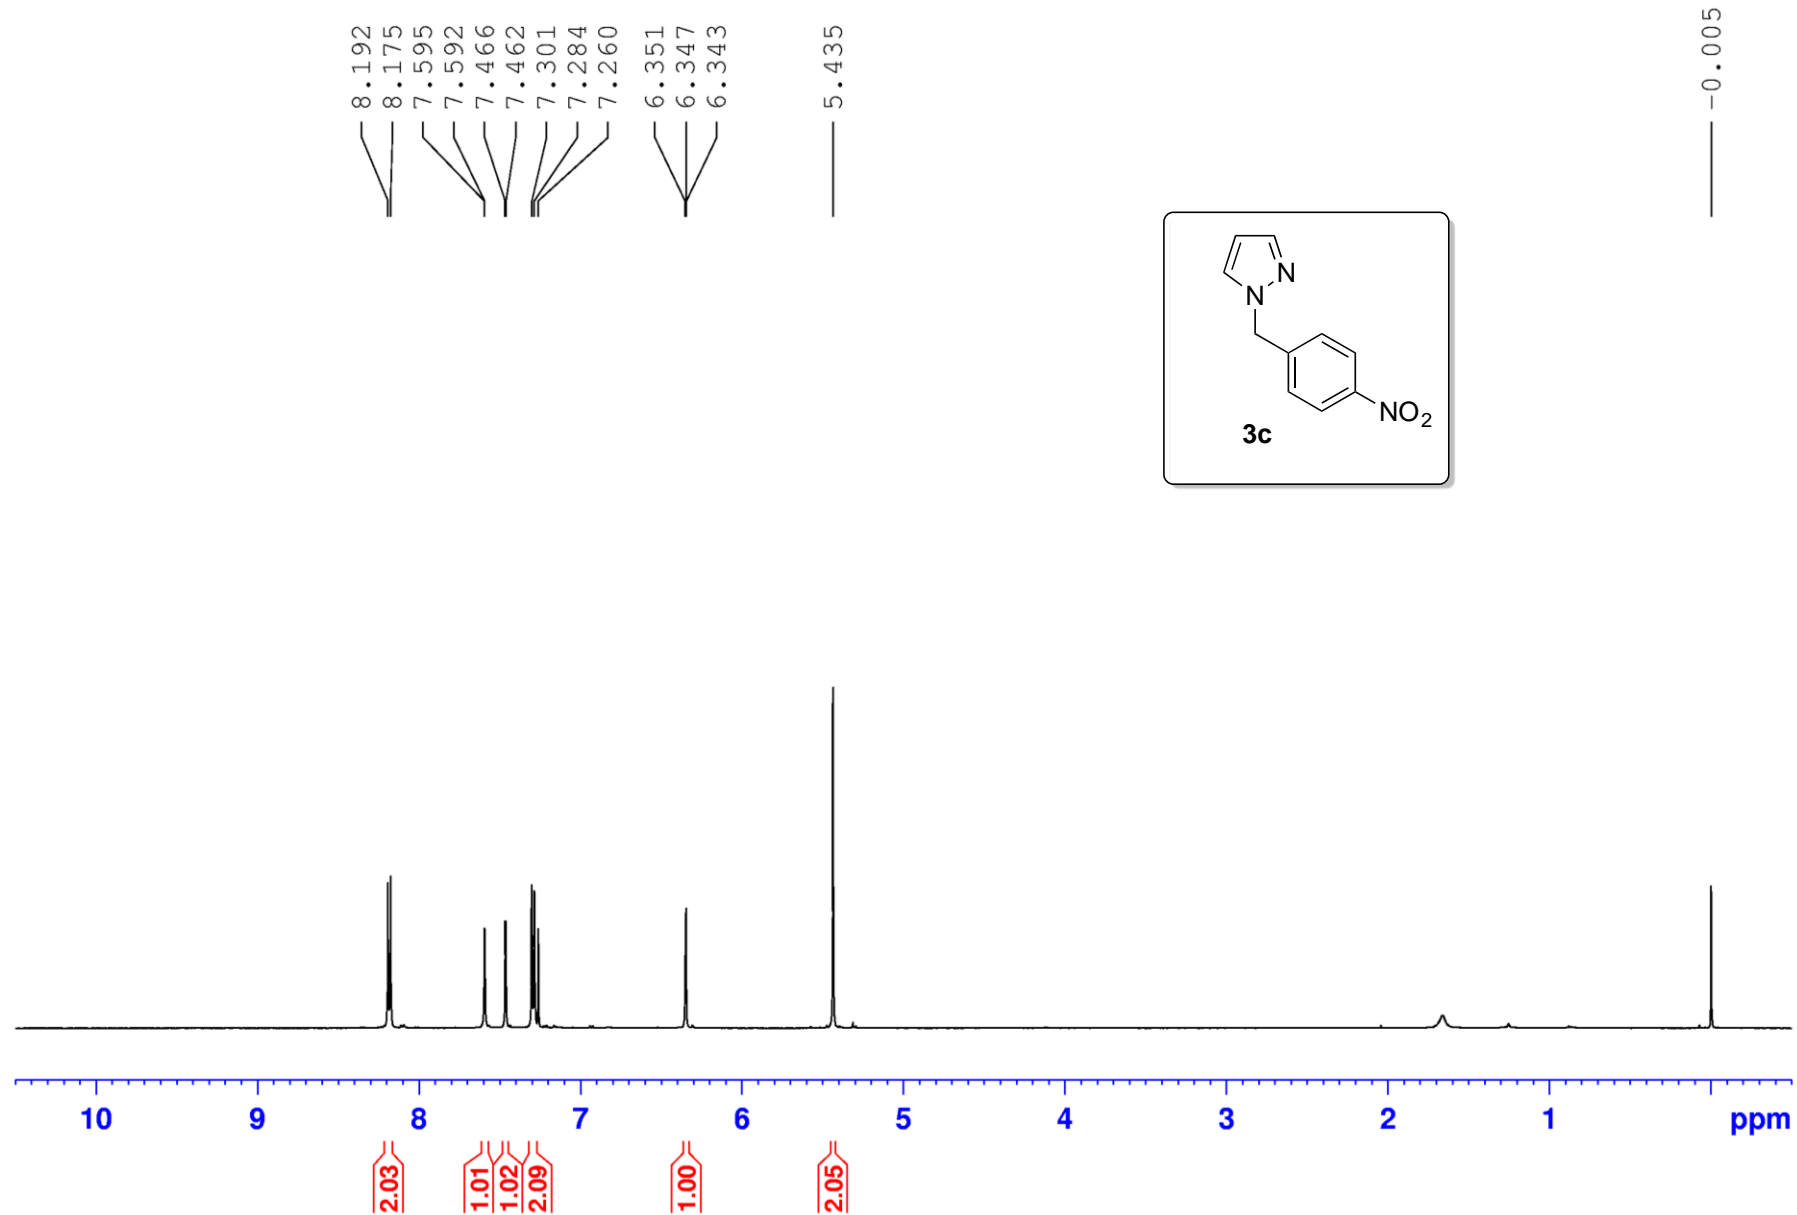

$^{13}\text{C}$  NMR ( $\text{CDCl}_3$ , 125.8 MHz) spectrum of 1-(4-(nitro)benzyl)-1H-pyrazole (**3c**)

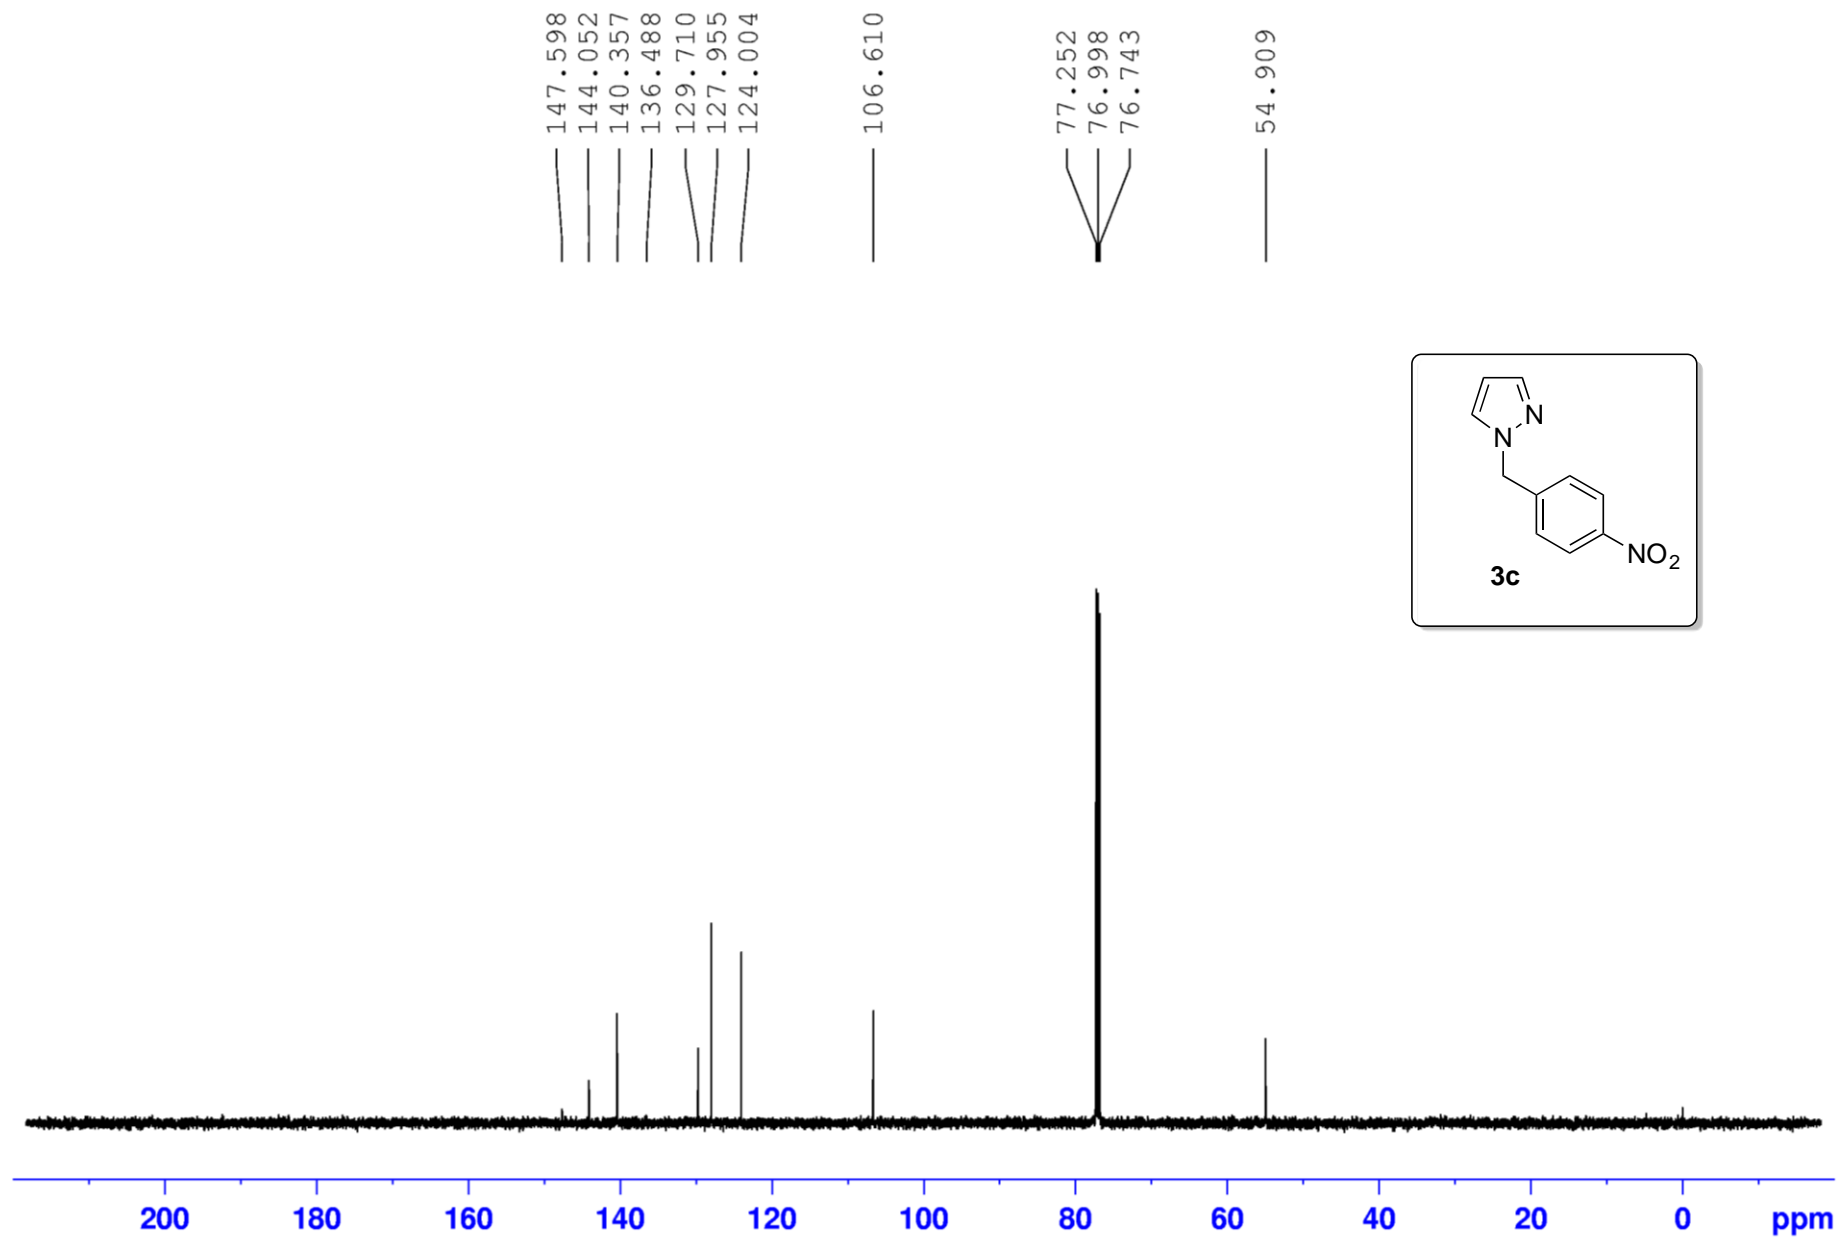

$^1\text{H}$  NMR ( $\text{CDCl}_3$ , 500 MHz) spectrum of 1-(4-(fluoro)benzyl)-1*H*-pyrazole (**3d**)

7.545  
7.543  
7.372  
7.367  
7.258  
7.196  
7.185  
7.179  
7.168  
7.032  
7.015  
6.998  
6.282  
6.278  
6.274  
5.281

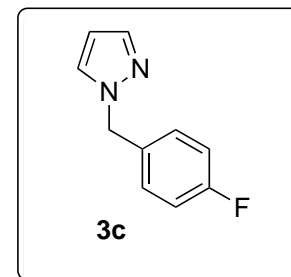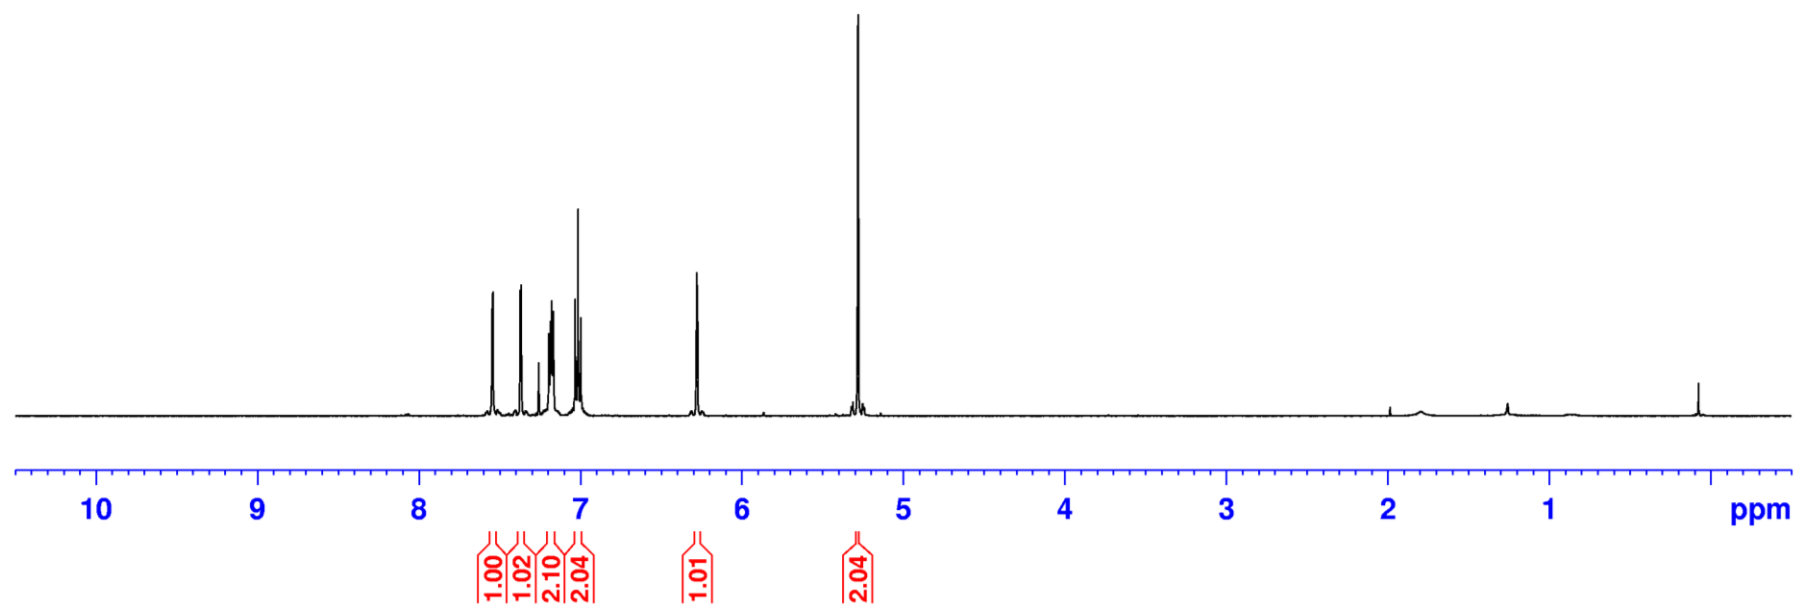

$^{13}\text{C}$  NMR ( $\text{CDCl}_3$ , 125.8 MHz) spectrum of 1-(4-(fluoro)benzyl)-1H-pyrazole (**3d**)

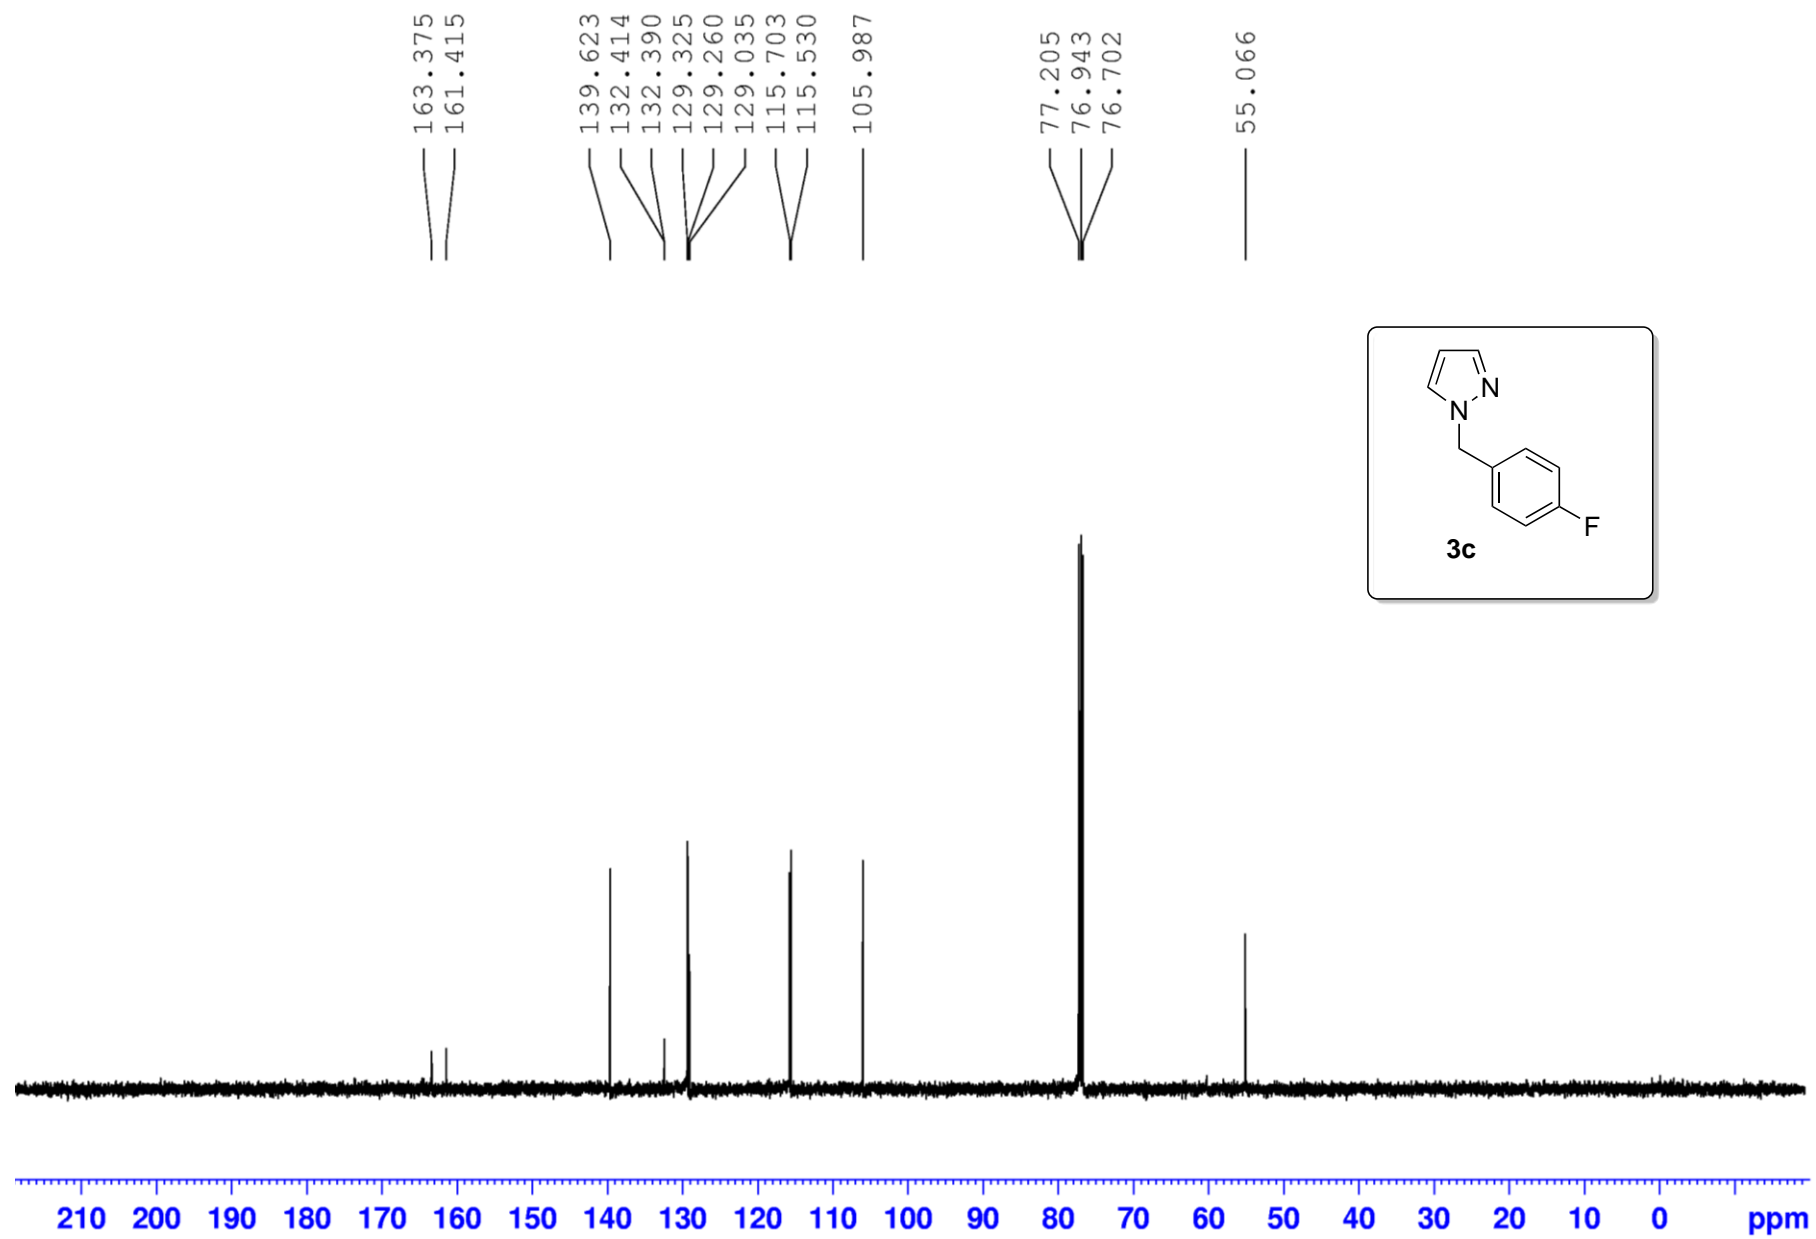

$^{19}\text{F}$  NMR ( $\text{CDCl}_3$ , 125.8 MHz) spectrum of 1-(4-(fluoro)benzyl)-1*H*-pyrazole (**3d**)

-114.221

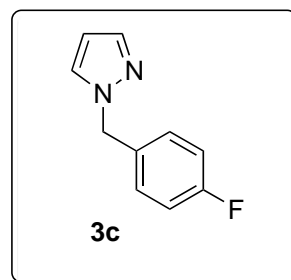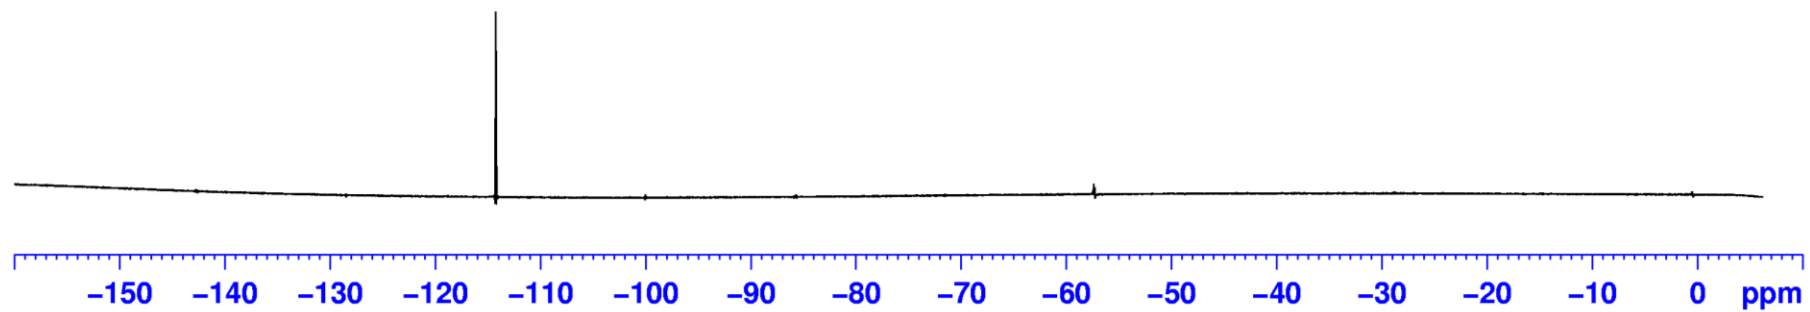

$^1\text{H}$  NMR ( $\text{CDCl}_3$ , 300 MHz) spectrum of 1-(naphthalene-2-ylmethyl)-1*H*-pyrazole (**3e**)

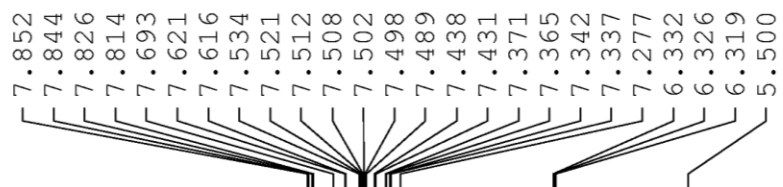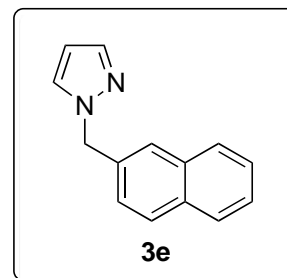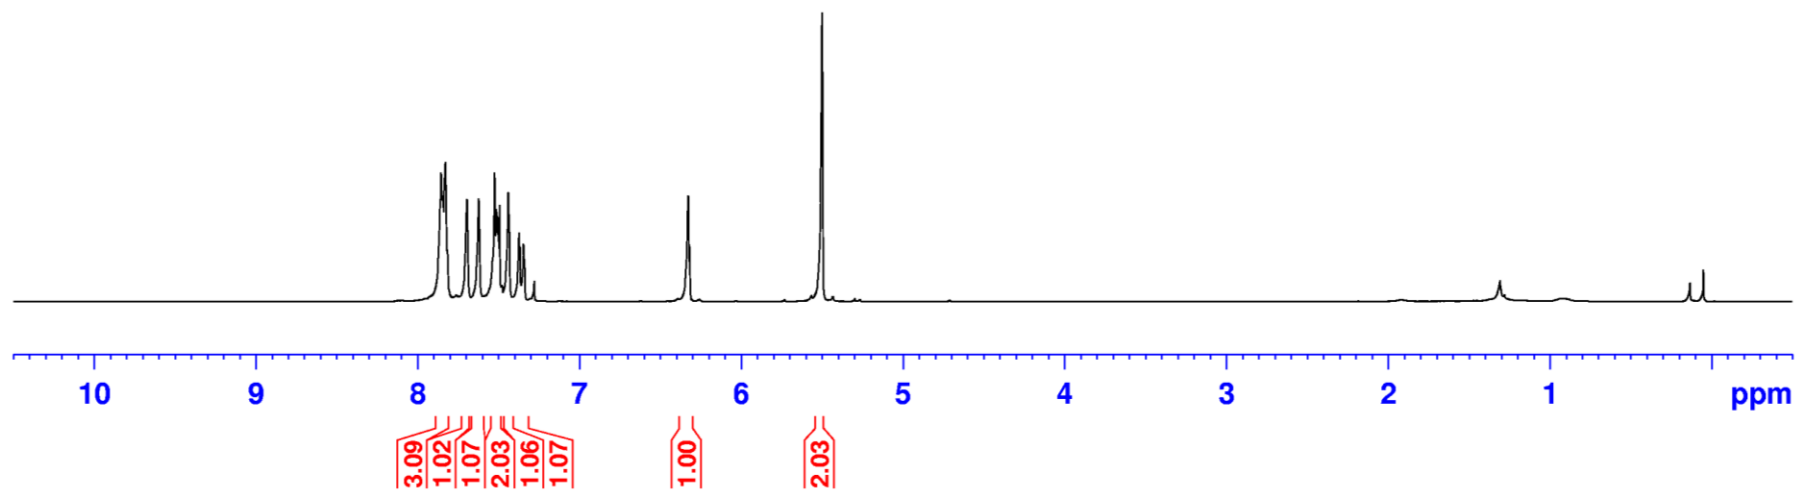

$^{13}\text{C}$  NMR ( $\text{CDCl}_3$ , 75.4 MHz) spectrum of 1-(naphthalene-2-ylmethyl)-1H-pyrazole (**3e**)

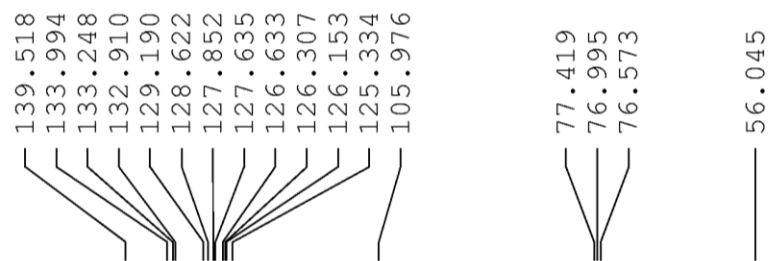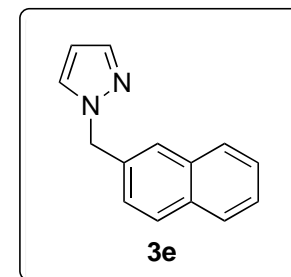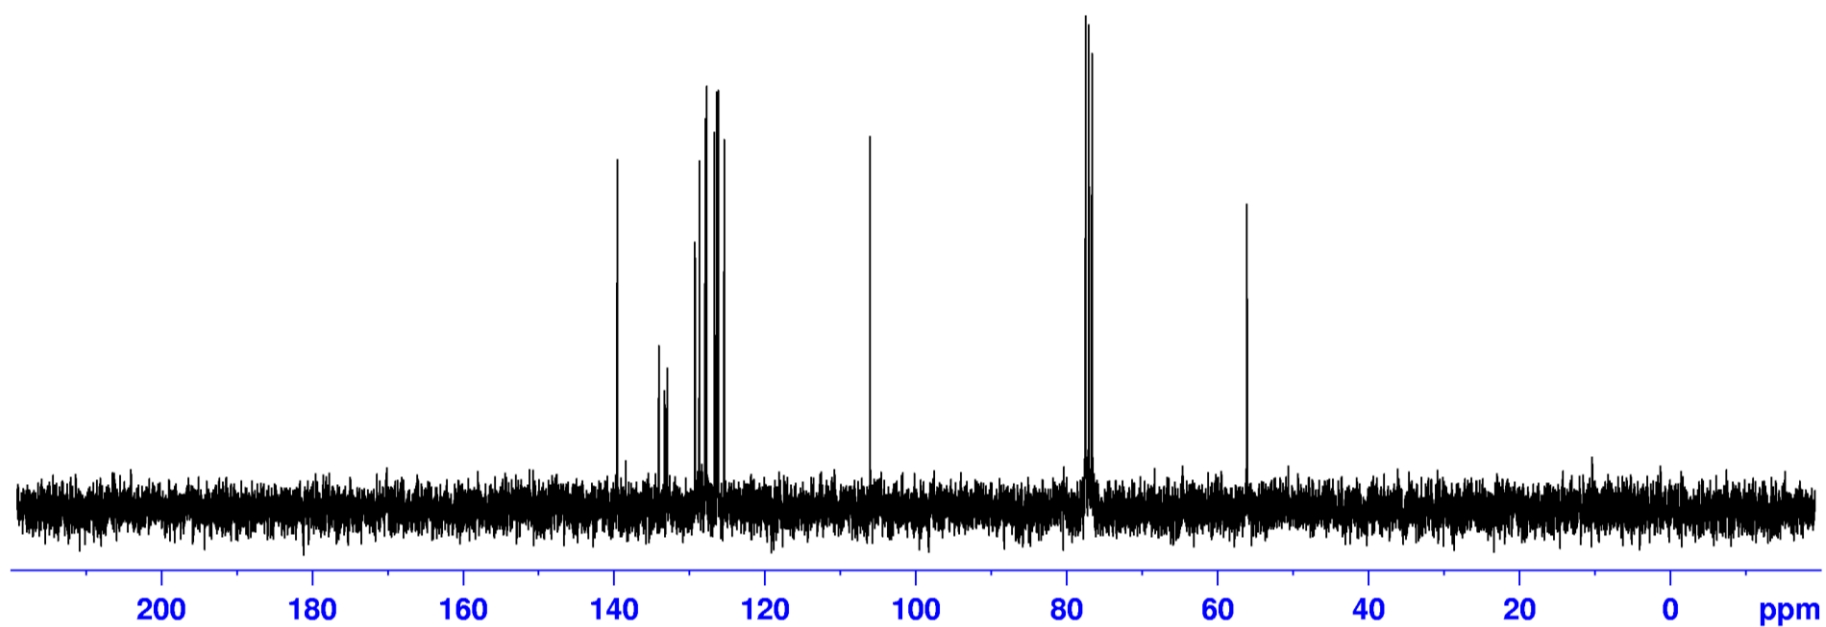

$^1\text{H}$  NMR ( $\text{CDCl}_3$ , 300 MHz) spectrum of 1-(3,5-dimethoxybenzyl)-1*H*-pyrazole (**3f**)

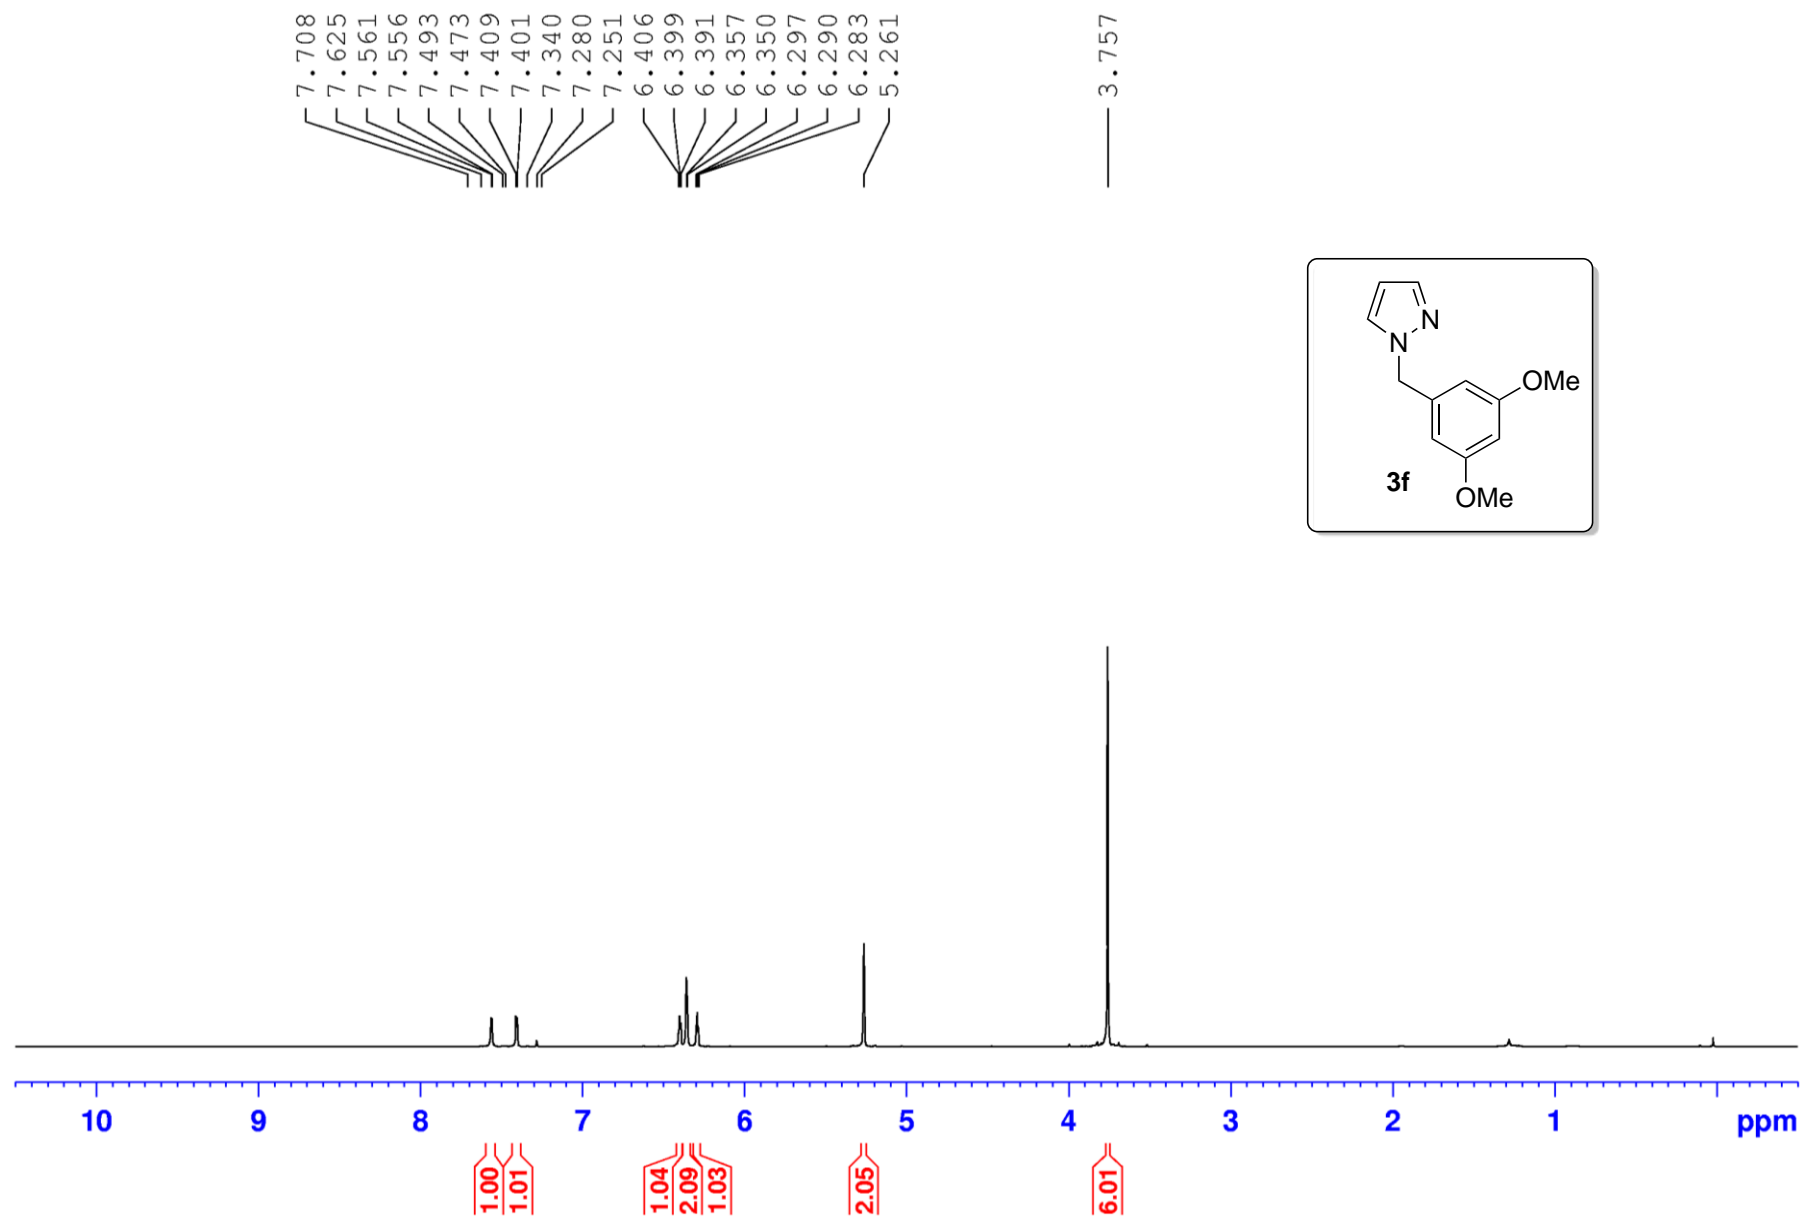



$^{13}\text{C}$  NMR ( $\text{CDCl}_3$ , 75.4 MHz) spectrum of 1-(3,5-dimethoxybenzyl)-1*H*-pyrazole (**3f**)

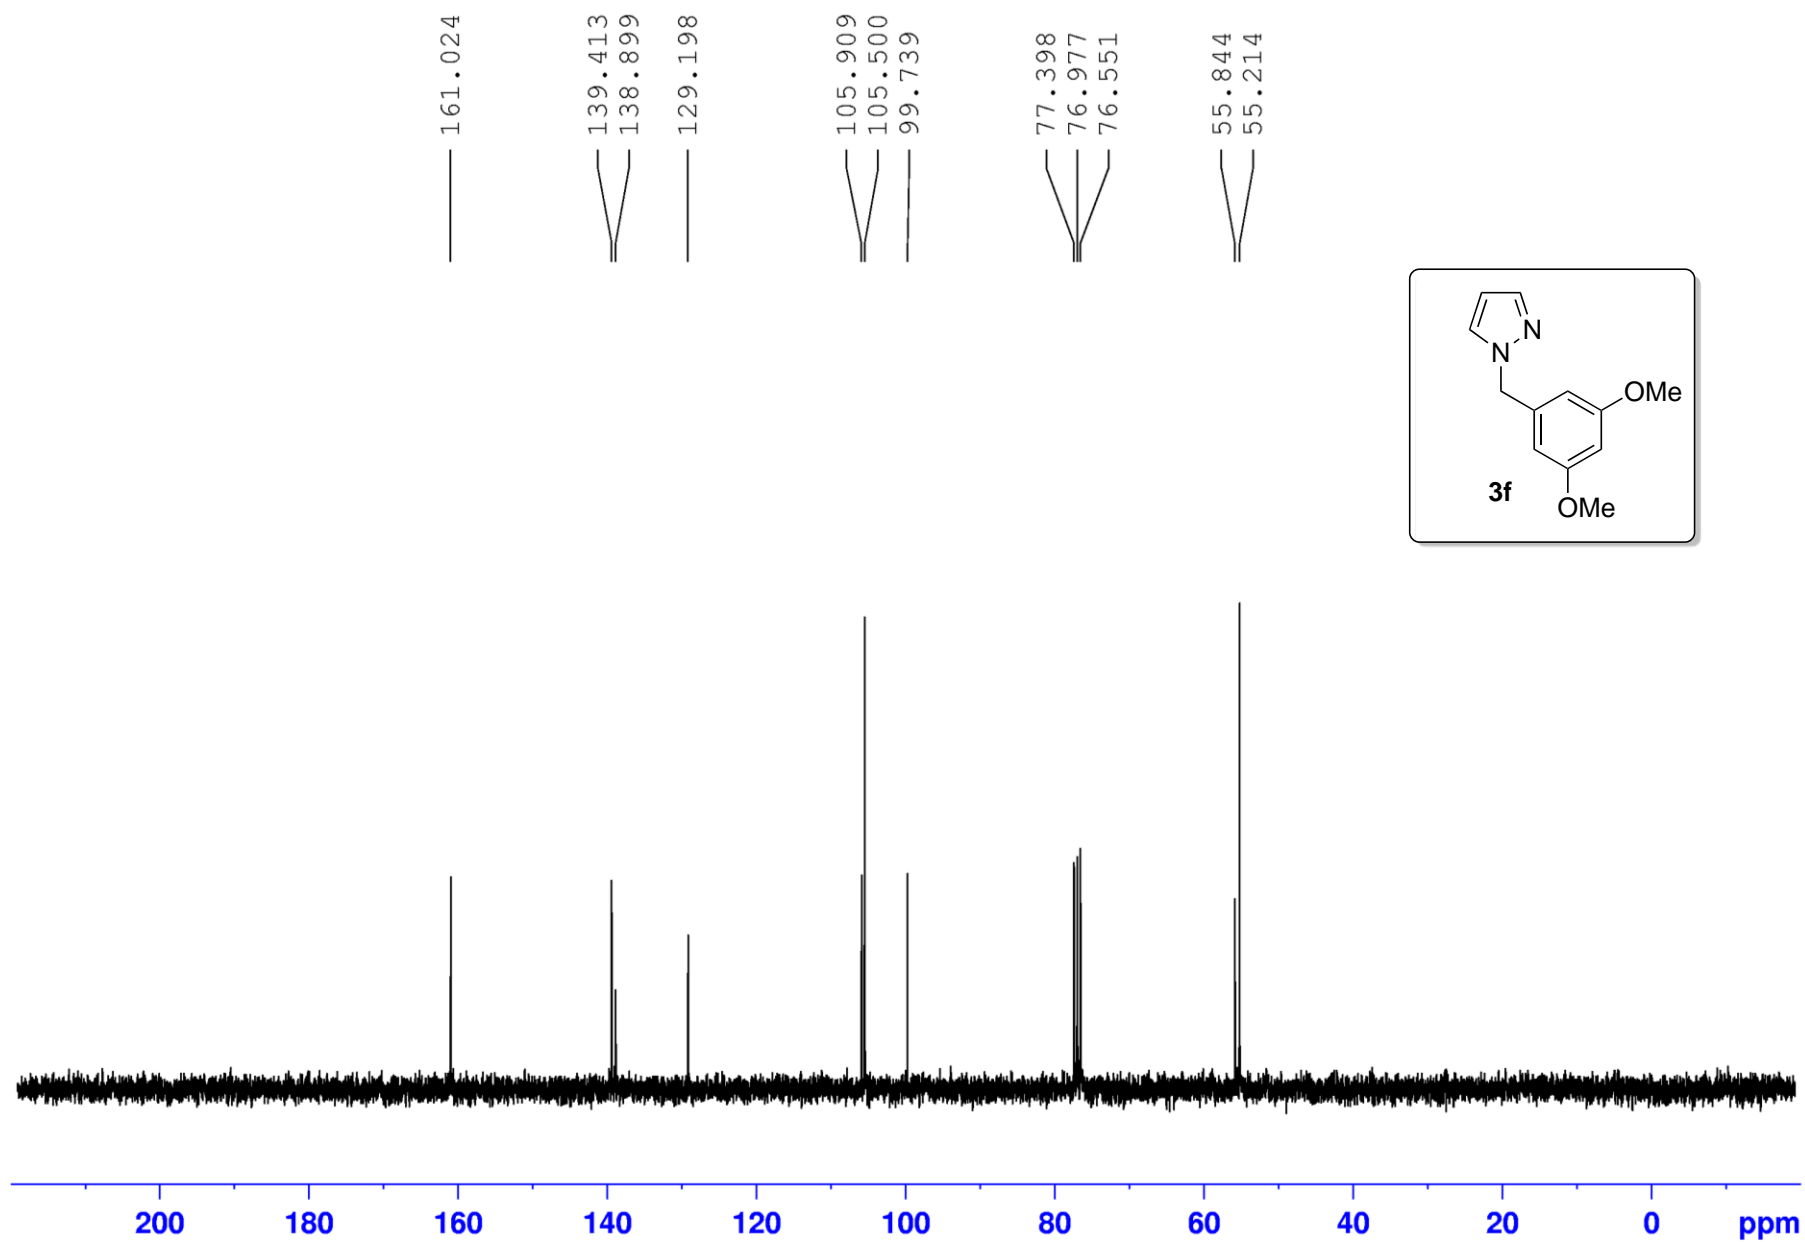

$^1\text{H}$  NMR ( $\text{CDCl}_3$ , 300 MHz) spectrum of methyl-3-((1*H*-pyrazol-1-yl)methyl)benzoate (**3g**)

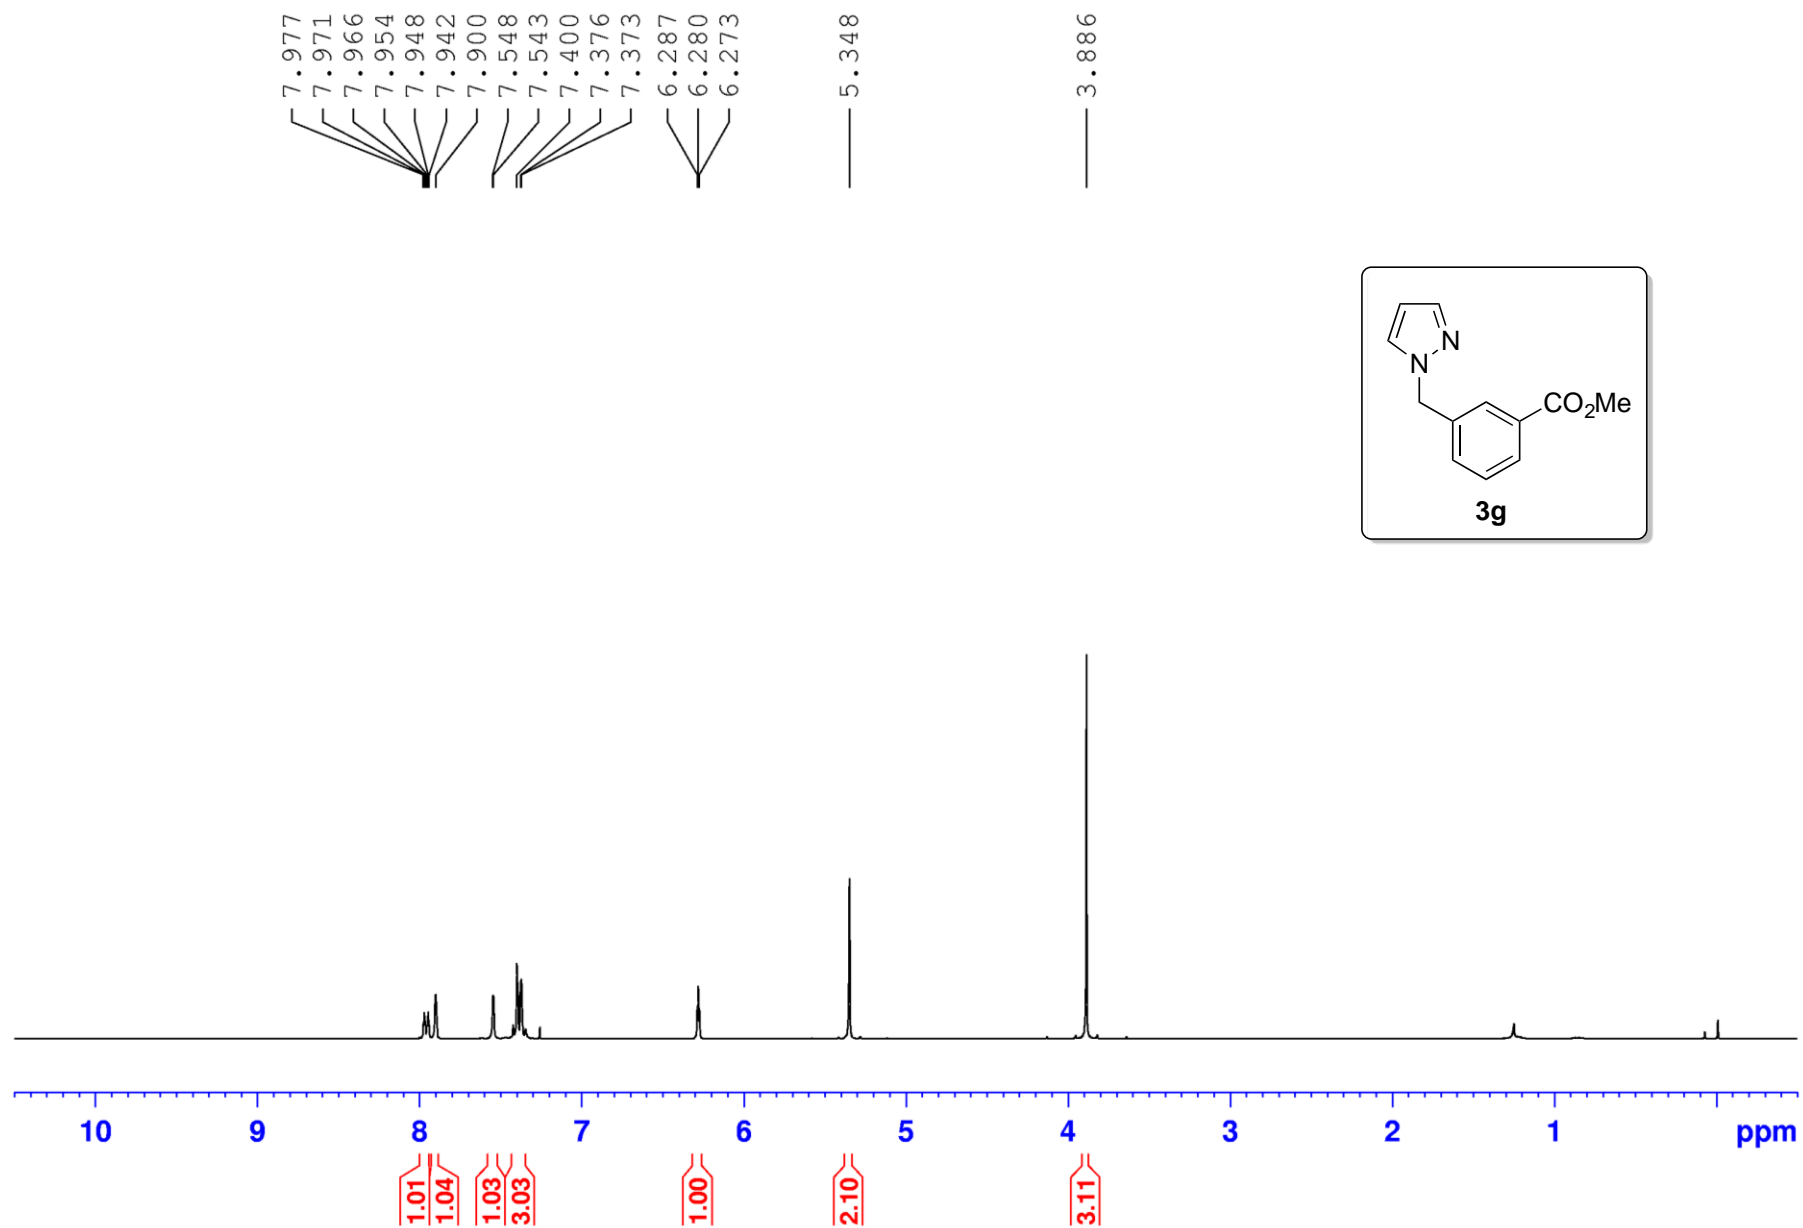

$^{13}\text{C}$  NMR ( $\text{CDCl}_3$ , 75.4 MHz) spectrum of methyl-3-((1*H*-pyrazol-1-yl)methyl)benzoate (**3g**)

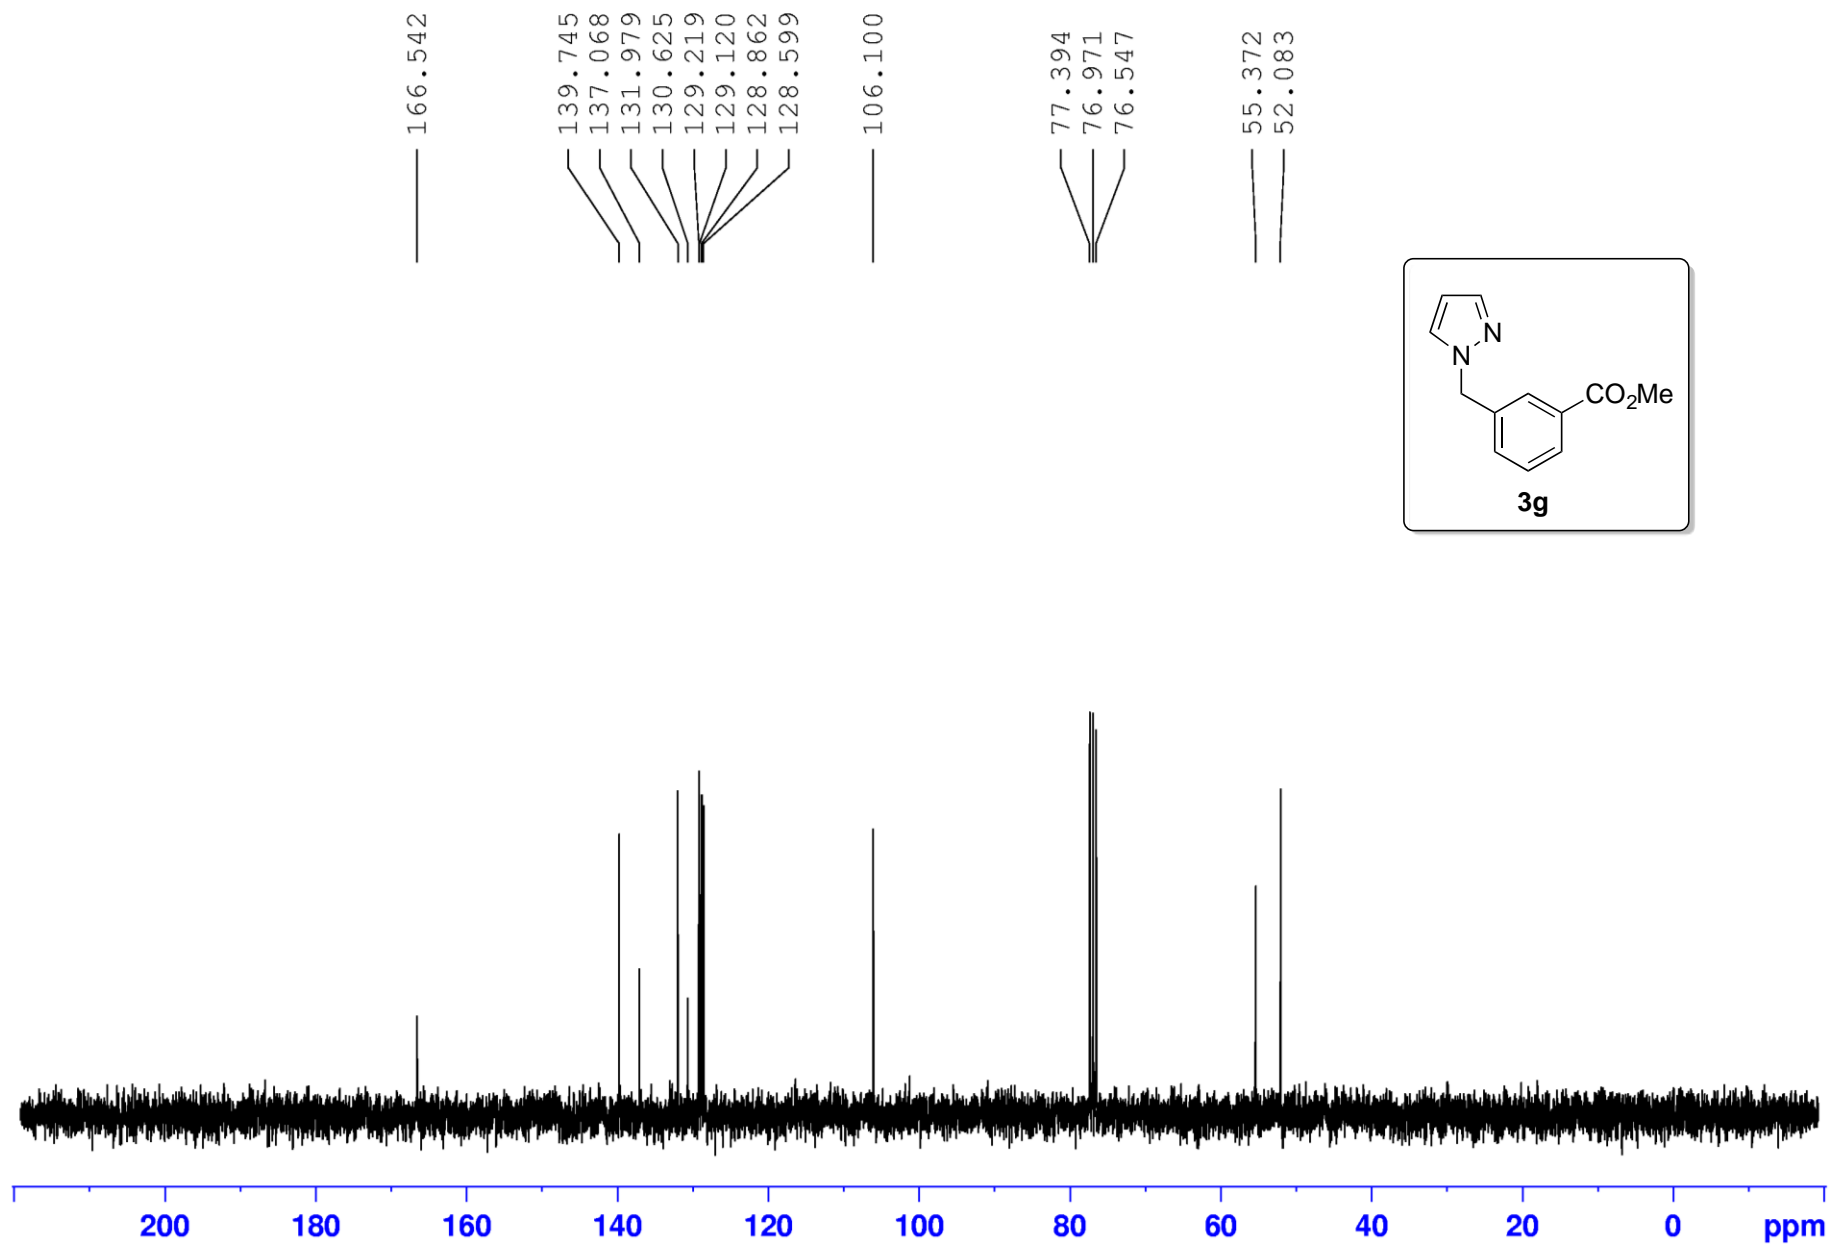

$^1\text{H}$  NMR ( $\text{CDCl}_3$ , 300 MHz) spectrum of 1-(4-((1*H*-pyrazol-1-yl)methyl)phenyl)ethan-1-one (**3h**)

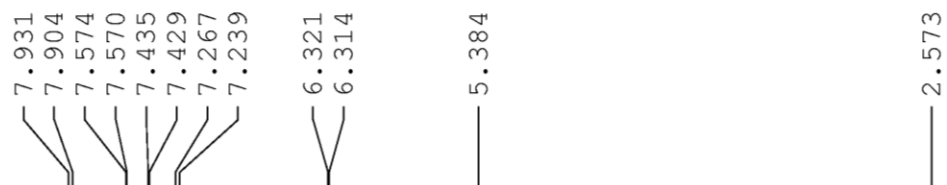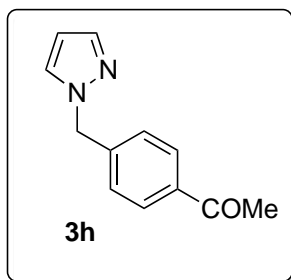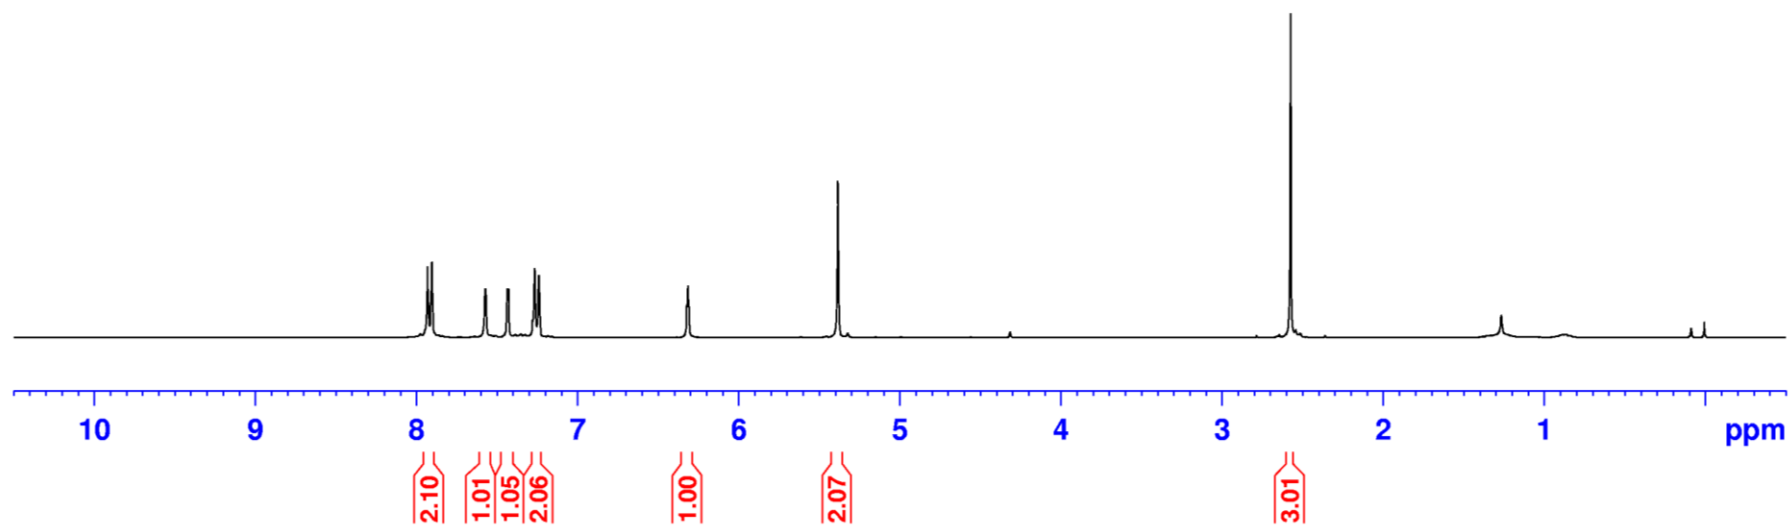

$^{13}\text{C}$  NMR ( $\text{CDCl}_3$ , 75.4 MHz) spectrum of 1-(4-((1*H*-pyrazol-1-yl)methyl)phenyl)ethan-1-one (**3h**)

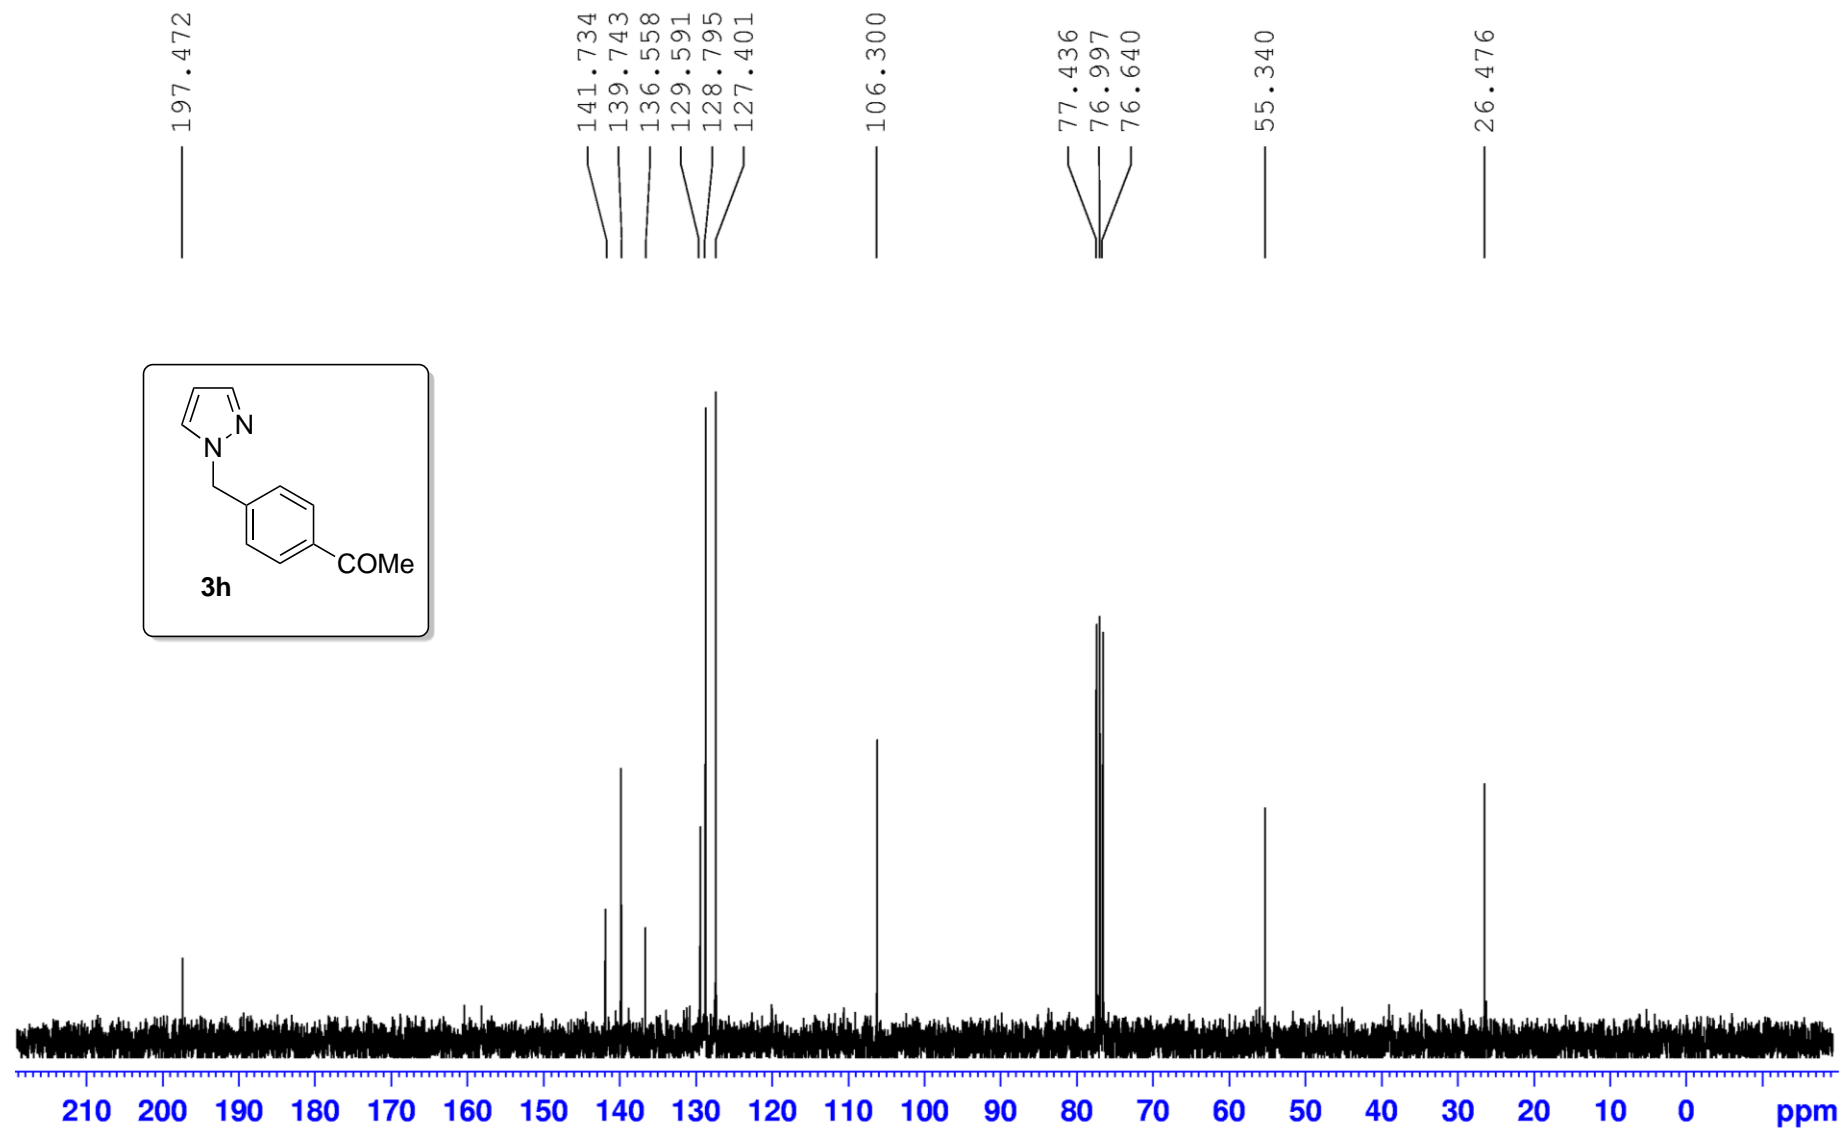

$^1\text{H}$  NMR ( $\text{CDCl}_3$ , 500 MHz) spectrum of 1-(4-(1*H*-Pyrrol-1-yl)benzyl)-1*H*-pyrazole (**3i**)

7.593  
7.436  
7.432  
7.383  
7.366  
7.289  
7.272  
7.095  
7.085  
7.081  
7.077  
6.377  
6.367  
6.364  
6.360  
6.321  
5.351

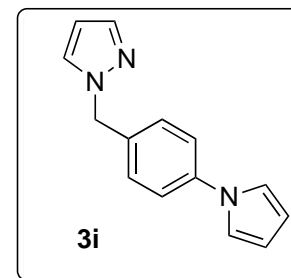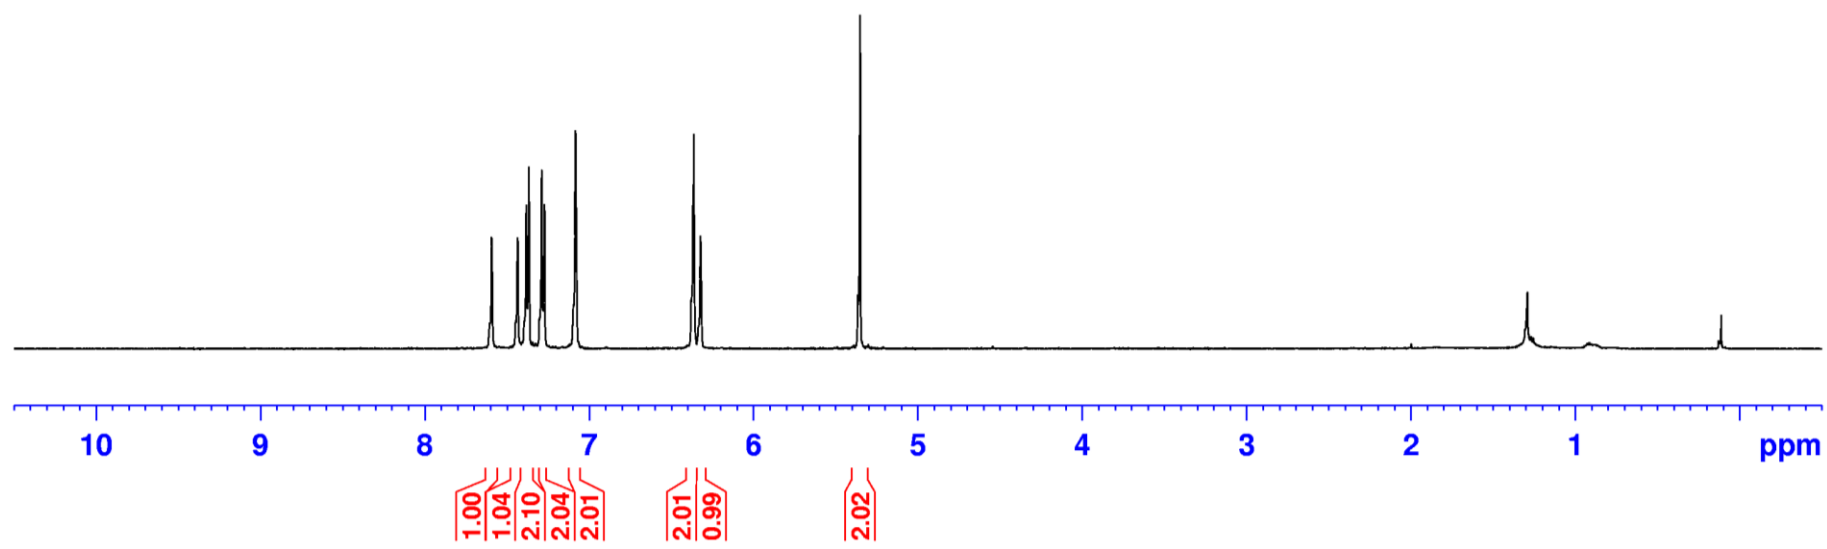

$^{13}\text{C}$  NMR ( $\text{CDCl}_3$ , 125.8 MHz) spectrum of 1-(4-(1*H*-Pyrrol-1-yl)benzyl)-1*H*-pyrazole (**3i**)

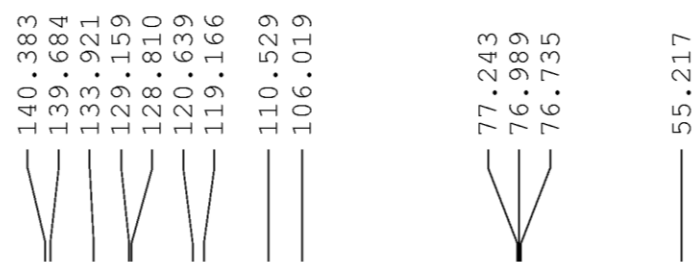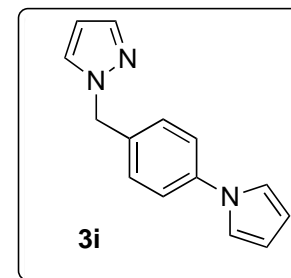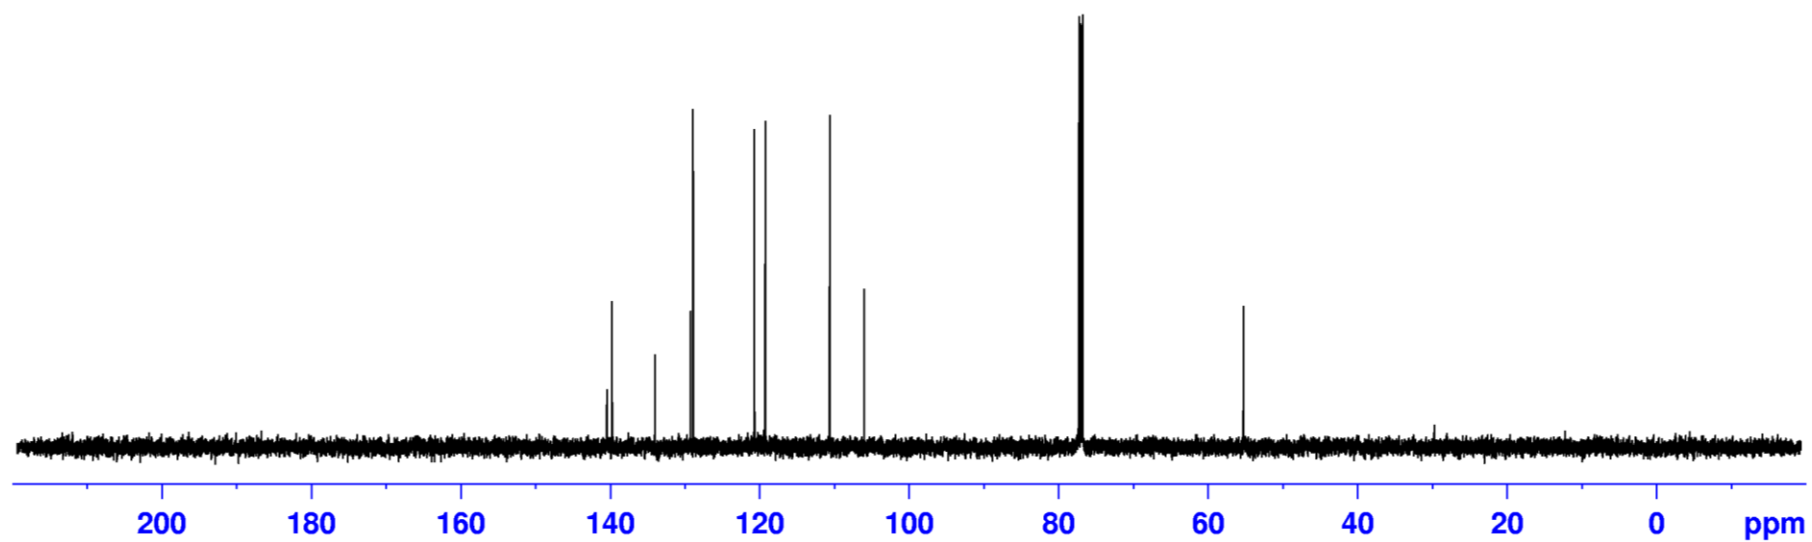

$^1\text{H}$  NMR ( $\text{CDCl}_3$ , 360 MHz) spectrum of 5-((1*H*-pyrazol-1-yl)methyl)-2-methoxypyridine (**3j**)

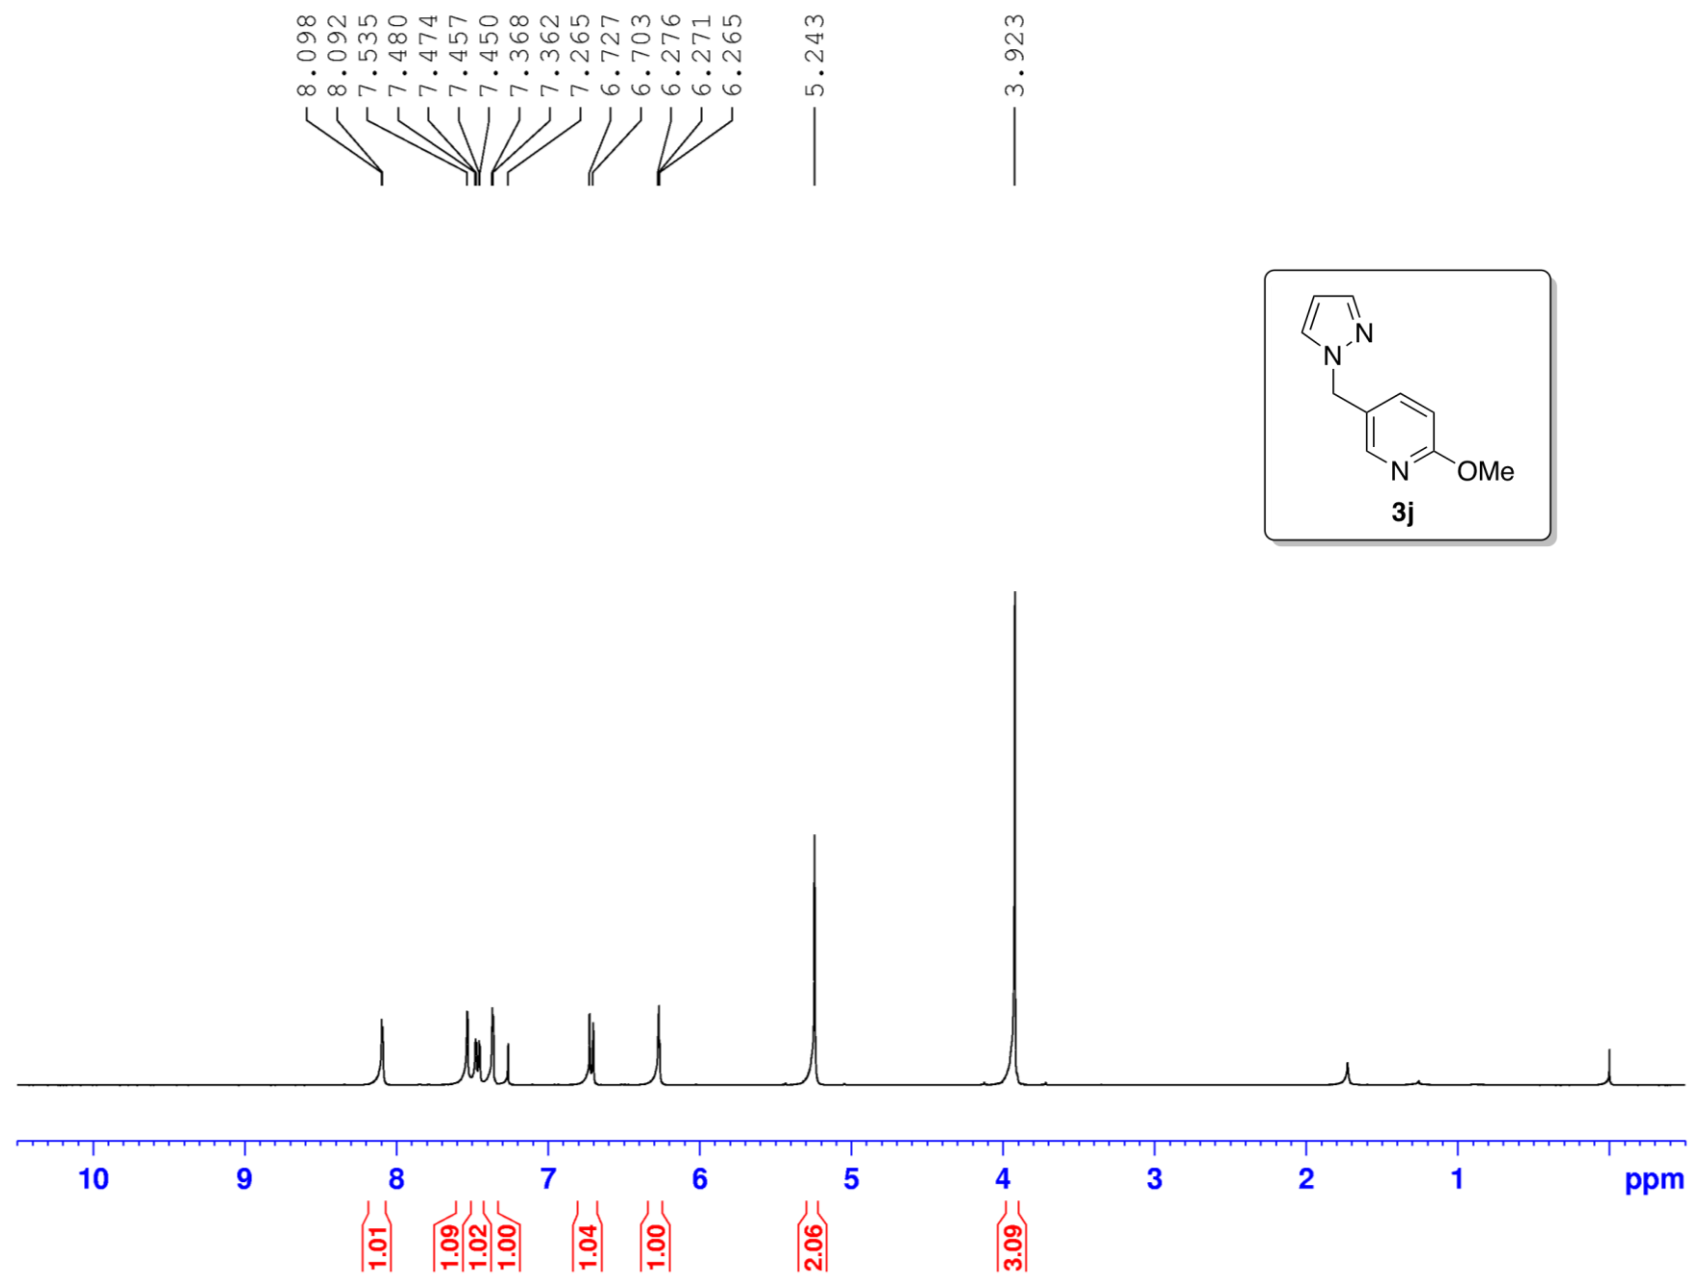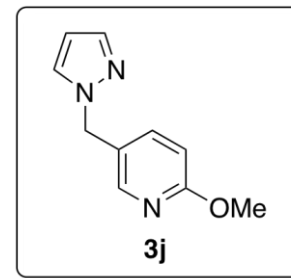



$^{13}\text{C}$  NMR ( $\text{CDCl}_3$ , 90.5 MHz) spectrum of 5-((1*H*-pyrazol-1-yl)methyl)-2-methoxypyridine (**3j**)

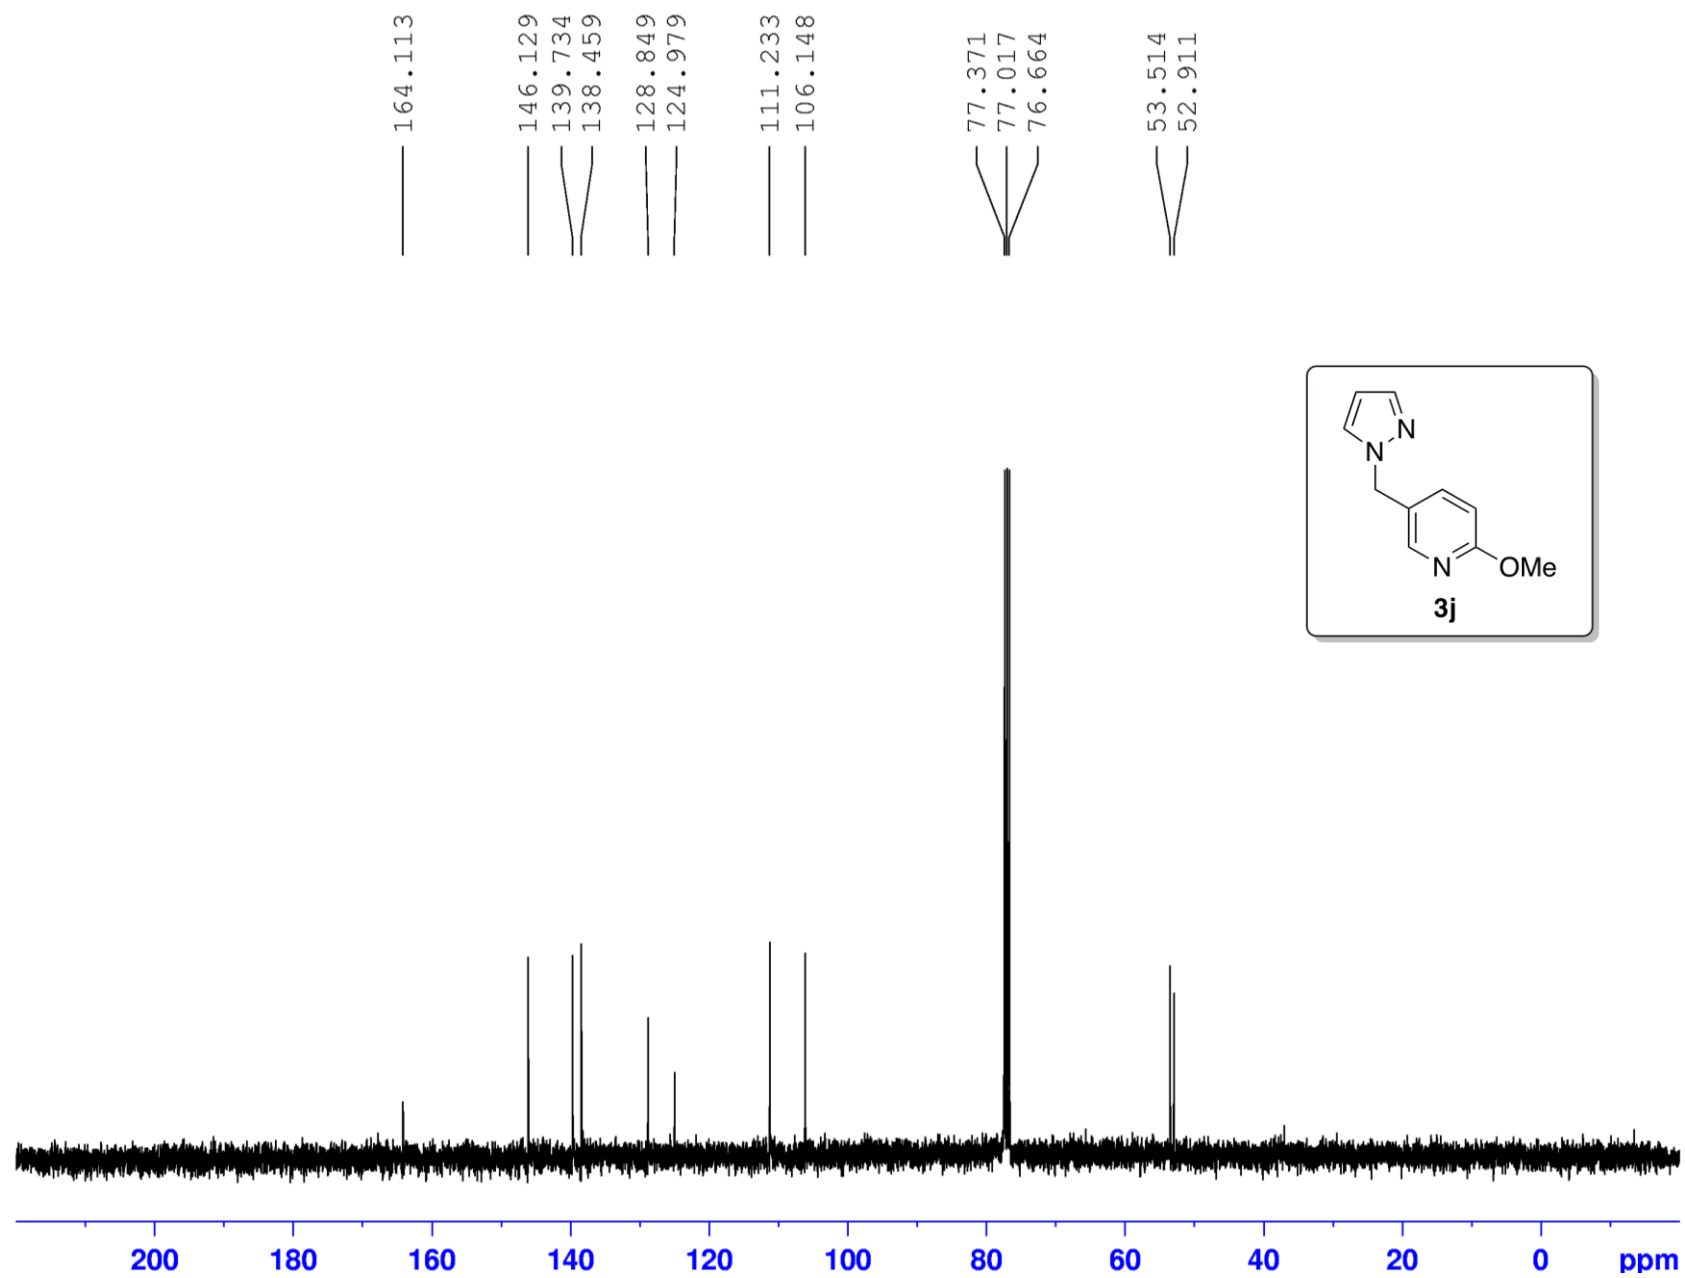

$^1\text{H}$  NMR ( $\text{CDCl}_3$ , 360 MHz) spectrum of 2-((1*H*-pyrazol-1-yl)methyl)pyrazine (**3k**)

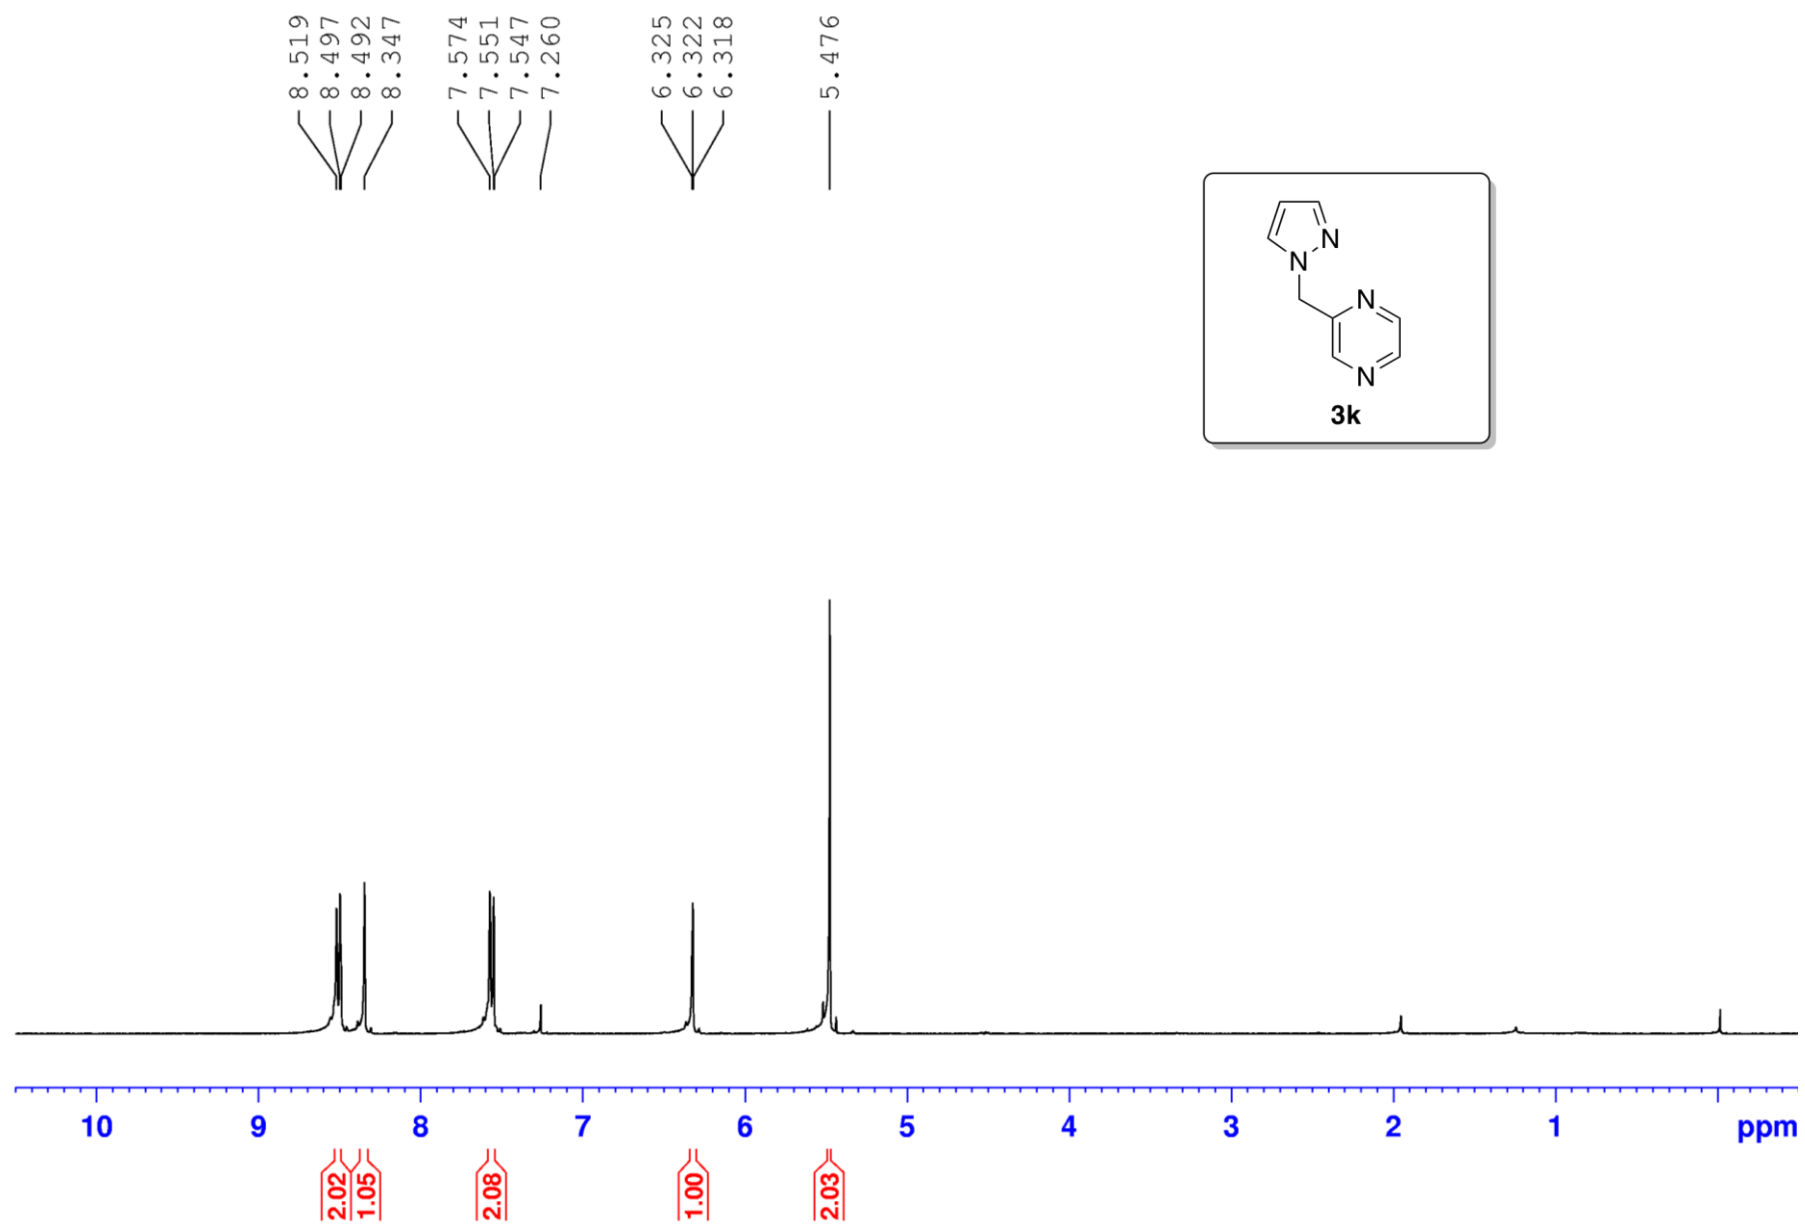

$^{13}\text{C}$  NMR ( $\text{CDCl}_3$ , 90.5 MHz) spectrum of 2-((1*H*-pyrazol-1-yl)methyl)pyrazine (**3k**)

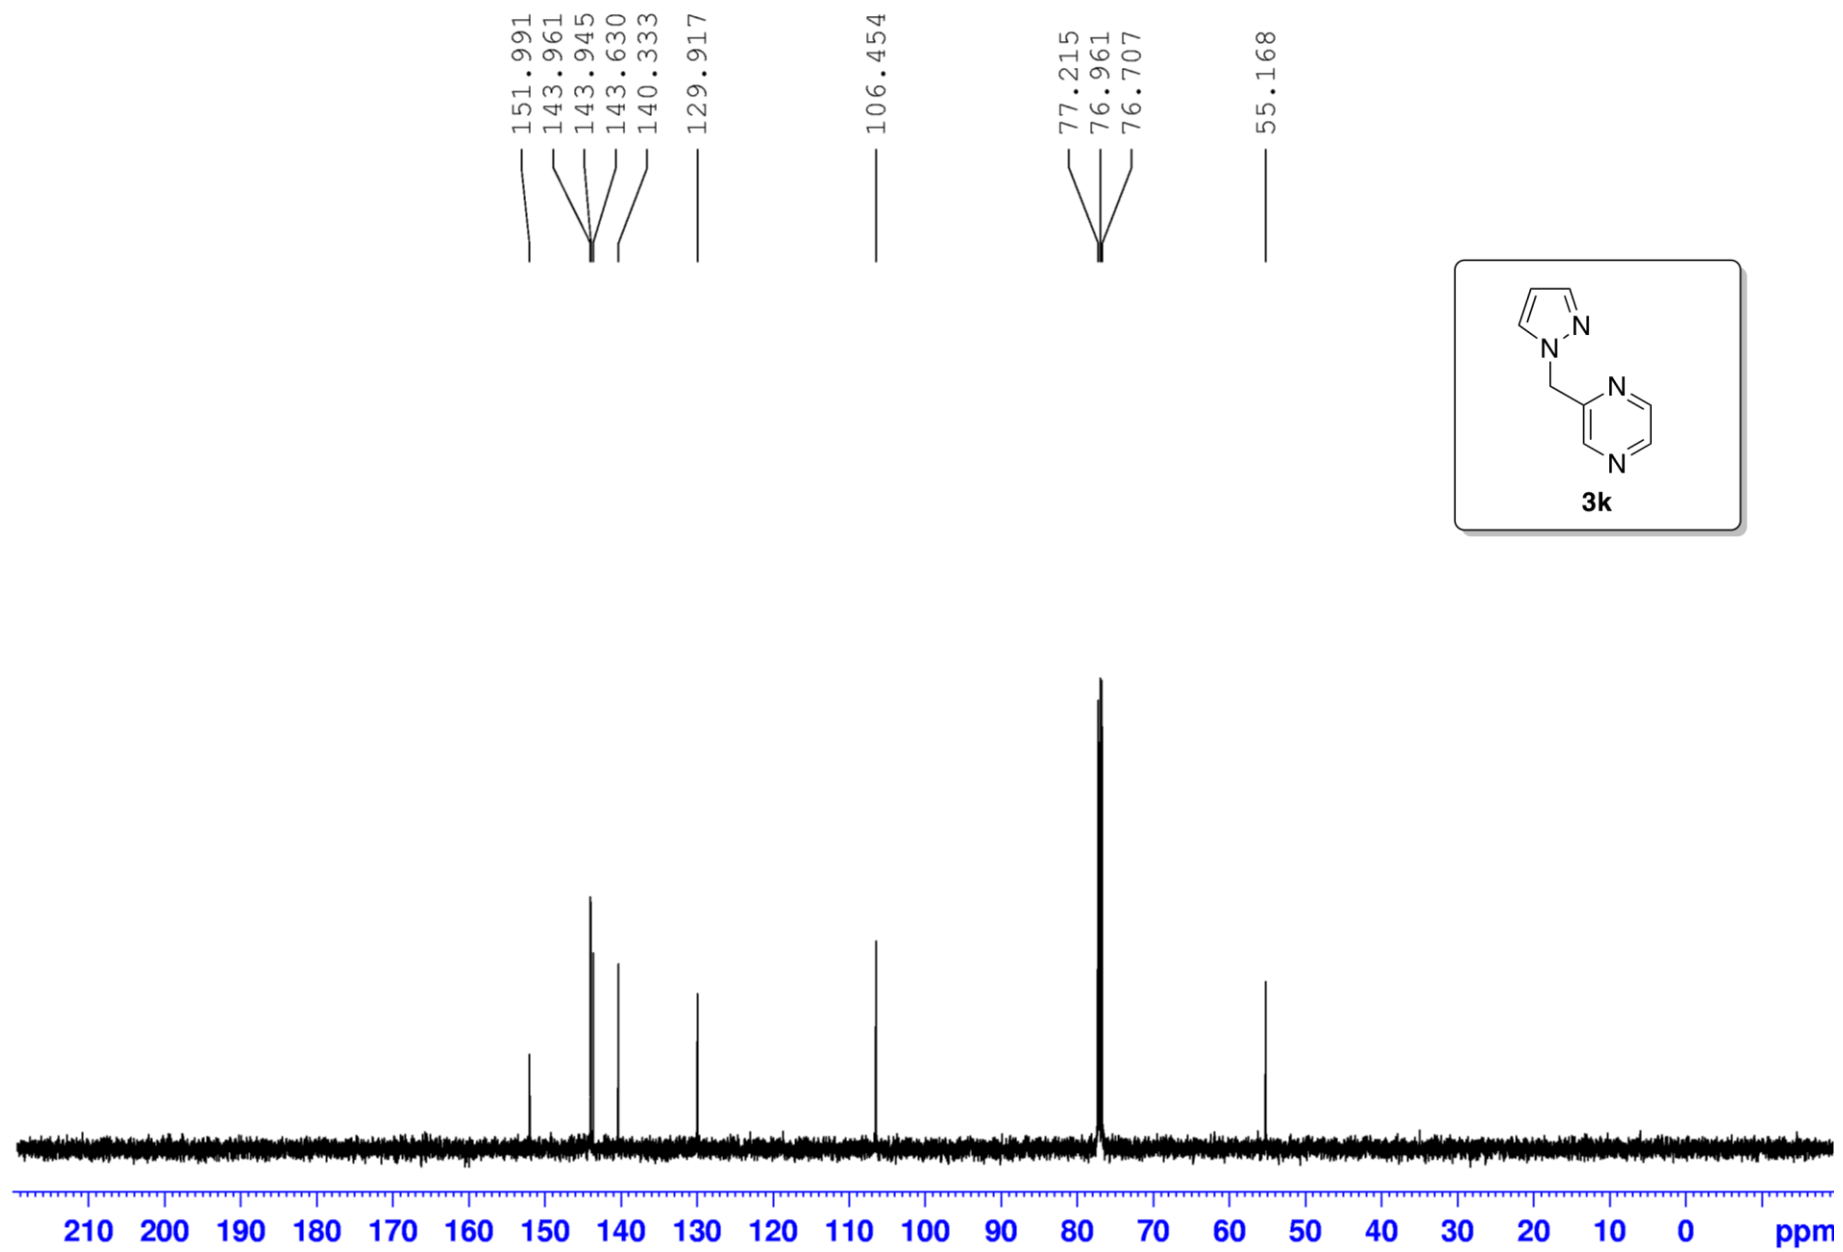

$^1\text{H}$  NMR ( $\text{CDCl}_3$ , 300 MHz) spectrum of 1-(4-(methoxy)benzyl)-1*H*-indole (**4a**)

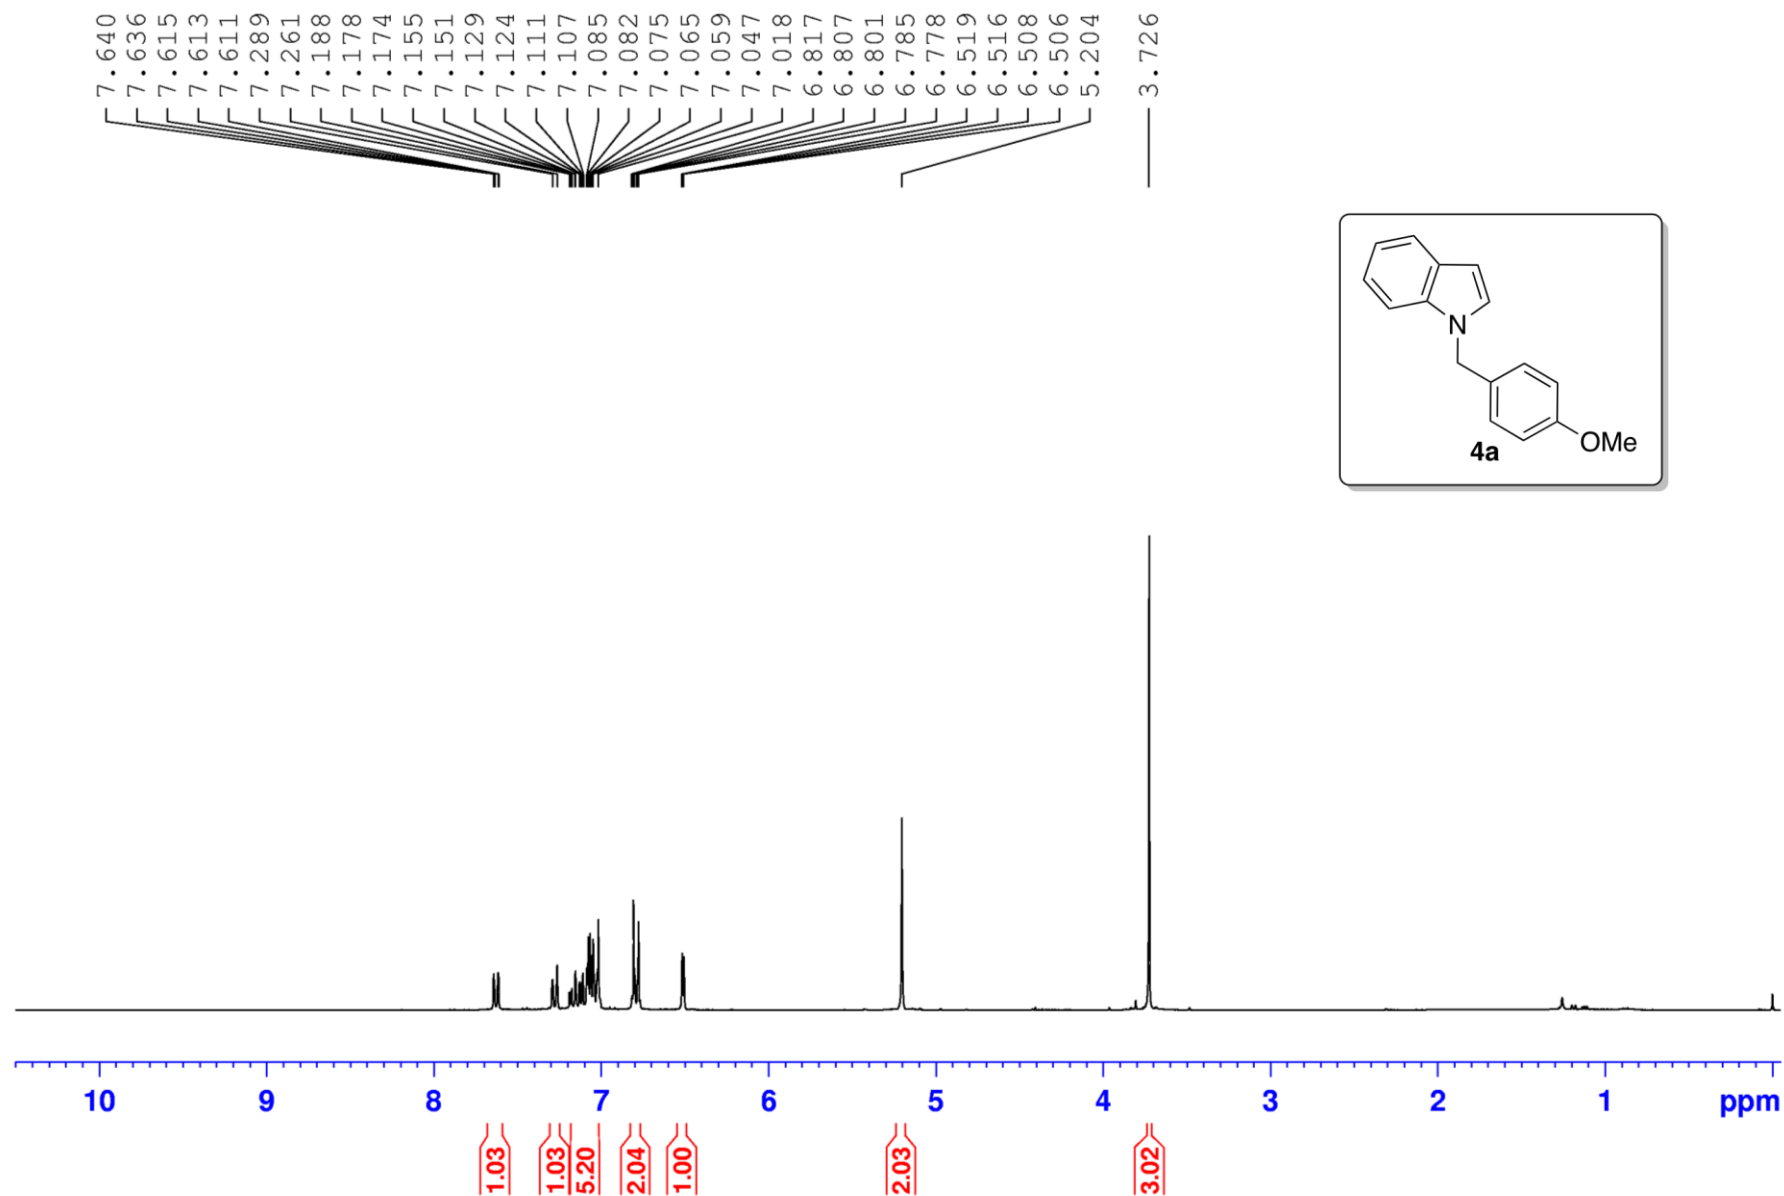

$^{13}\text{C}$  NMR ( $\text{CDCl}_3$ , 75.4 MHz) spectrum of 1-(4-(methoxy)benzyl)-1*H*-indole (**4a**)

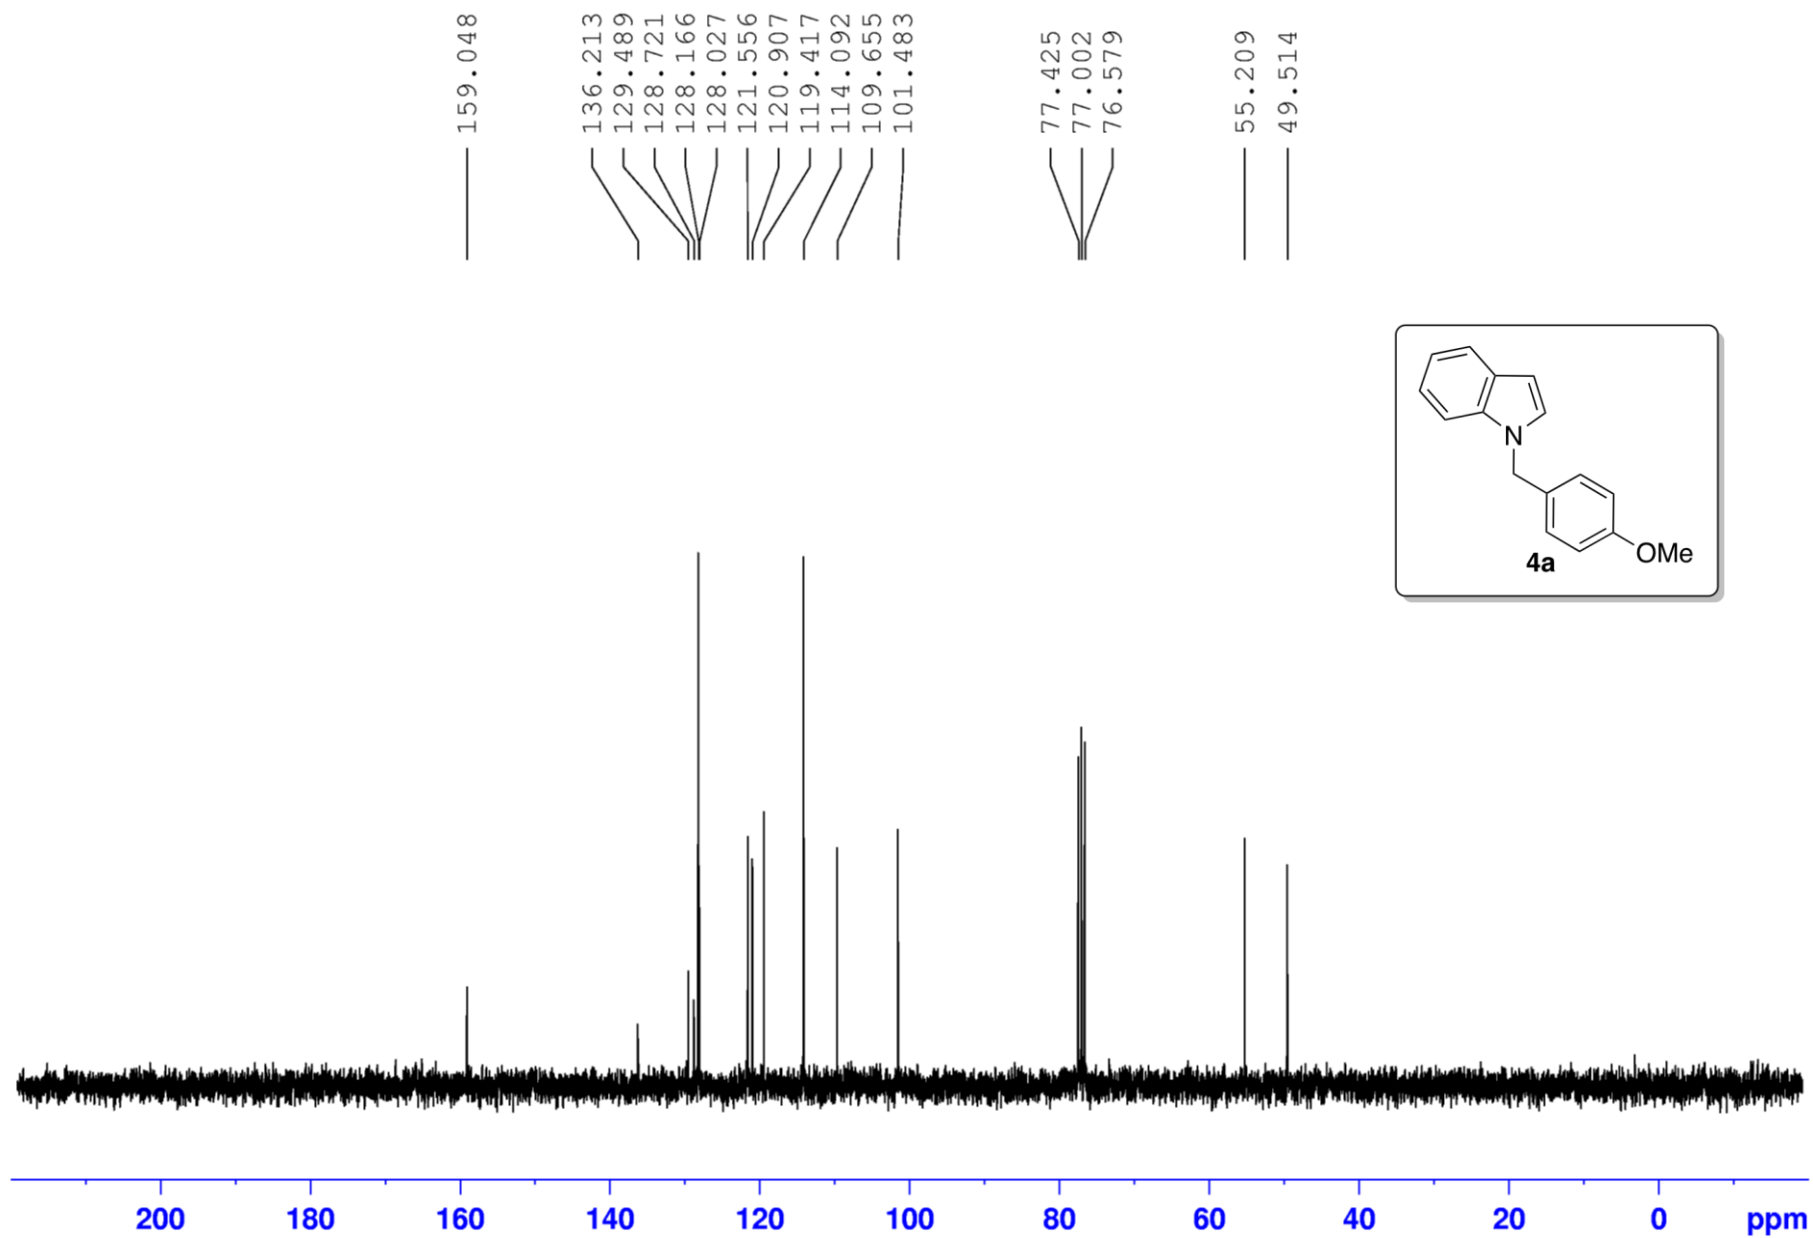

$^1\text{H}$  NMR ( $\text{CDCl}_3$ , 300 MHz) spectrum of 1-(2-methoxybenzyl)-1*H*-indole (**4b**)

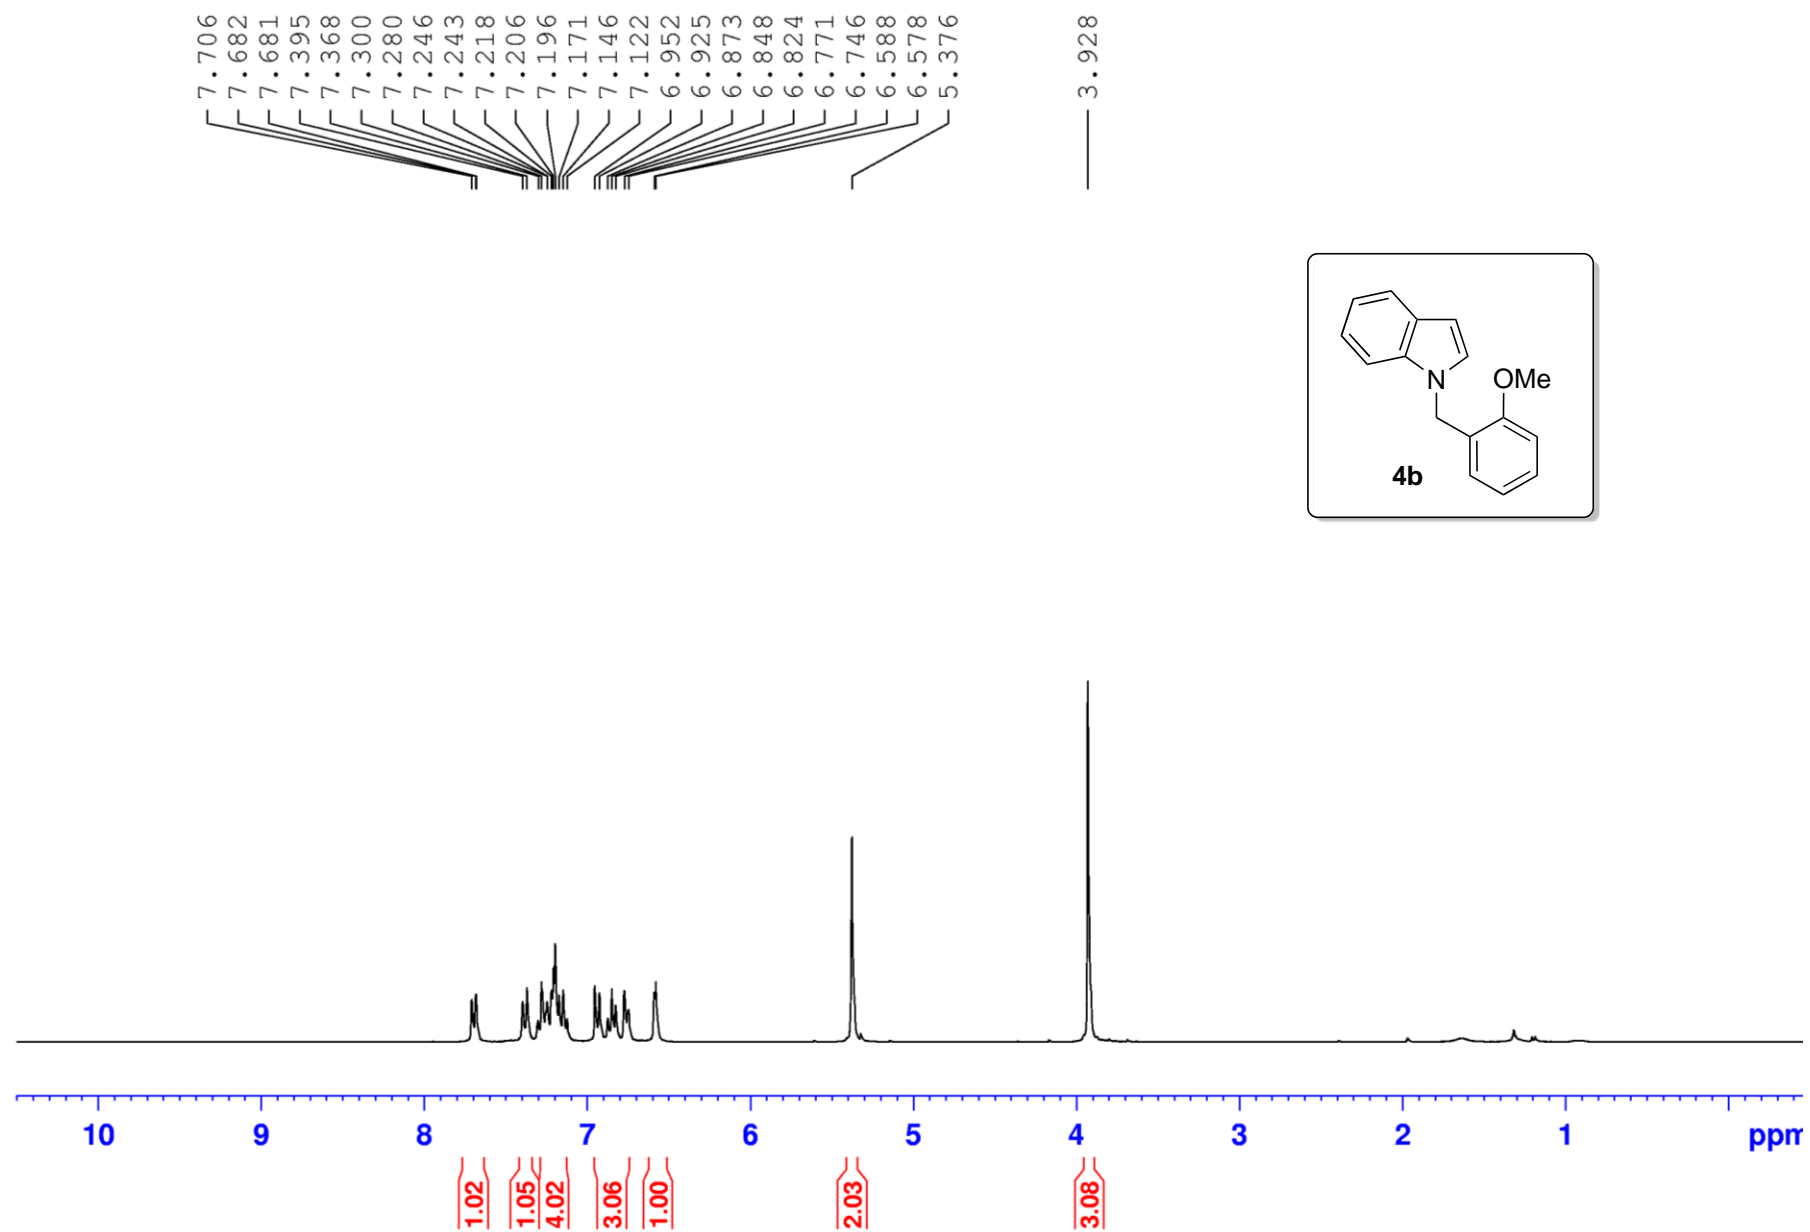

$^{13}\text{C}$  NMR ( $\text{CDCl}_3$ , 75.4 MHz) spectrum of 1-(2-methoxybenzyl)-1*H*-indole (**4b**)

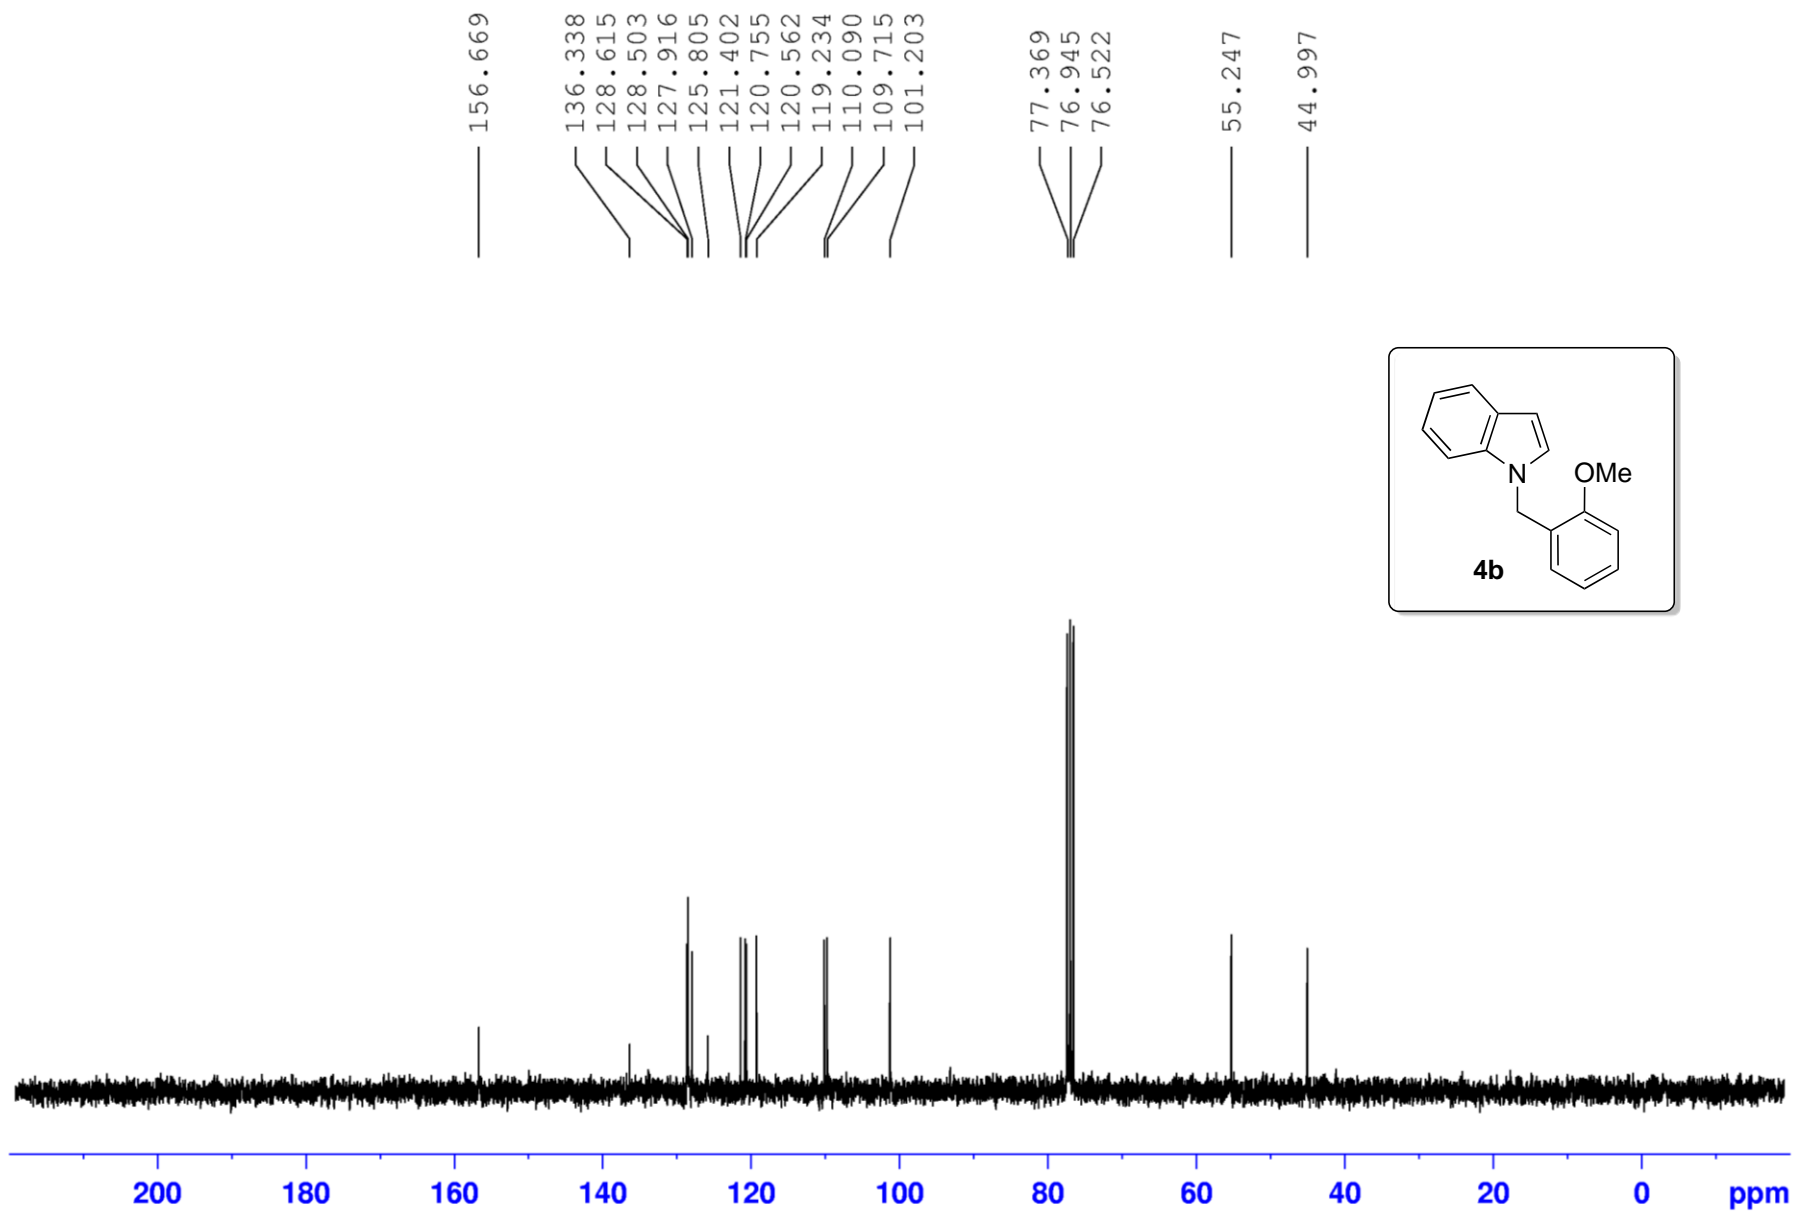

$^1\text{H}$  NMR ( $\text{CDCl}_3$ , 360 MHz) spectrum of 1-(3-methoxybenzyl)-1*H*-indole (**4c**)

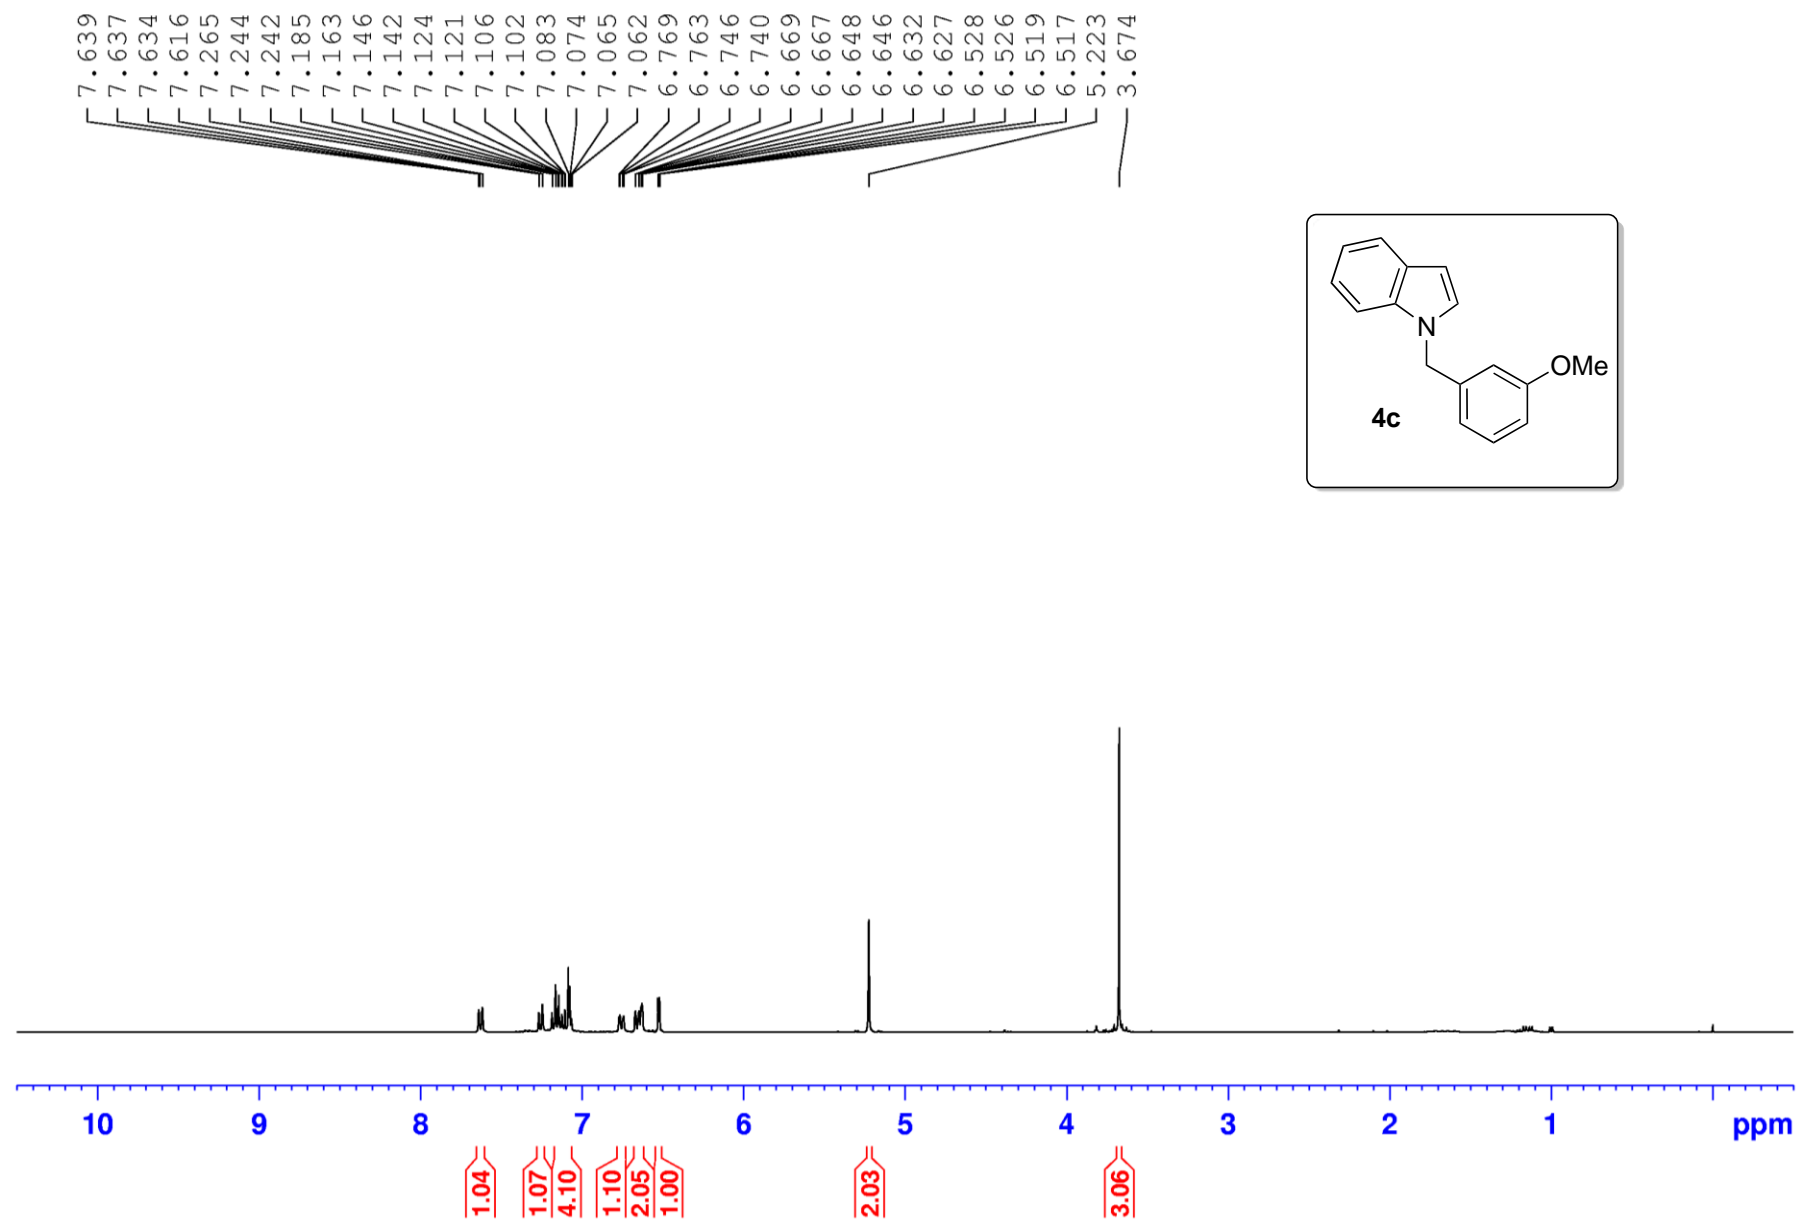



$^{13}\text{C}$  NMR ( $\text{CDCl}_3$ , 75.4 MHz) spectrum of 1-(3-methoxybenzyl)-1*H*-indole (**4c**)

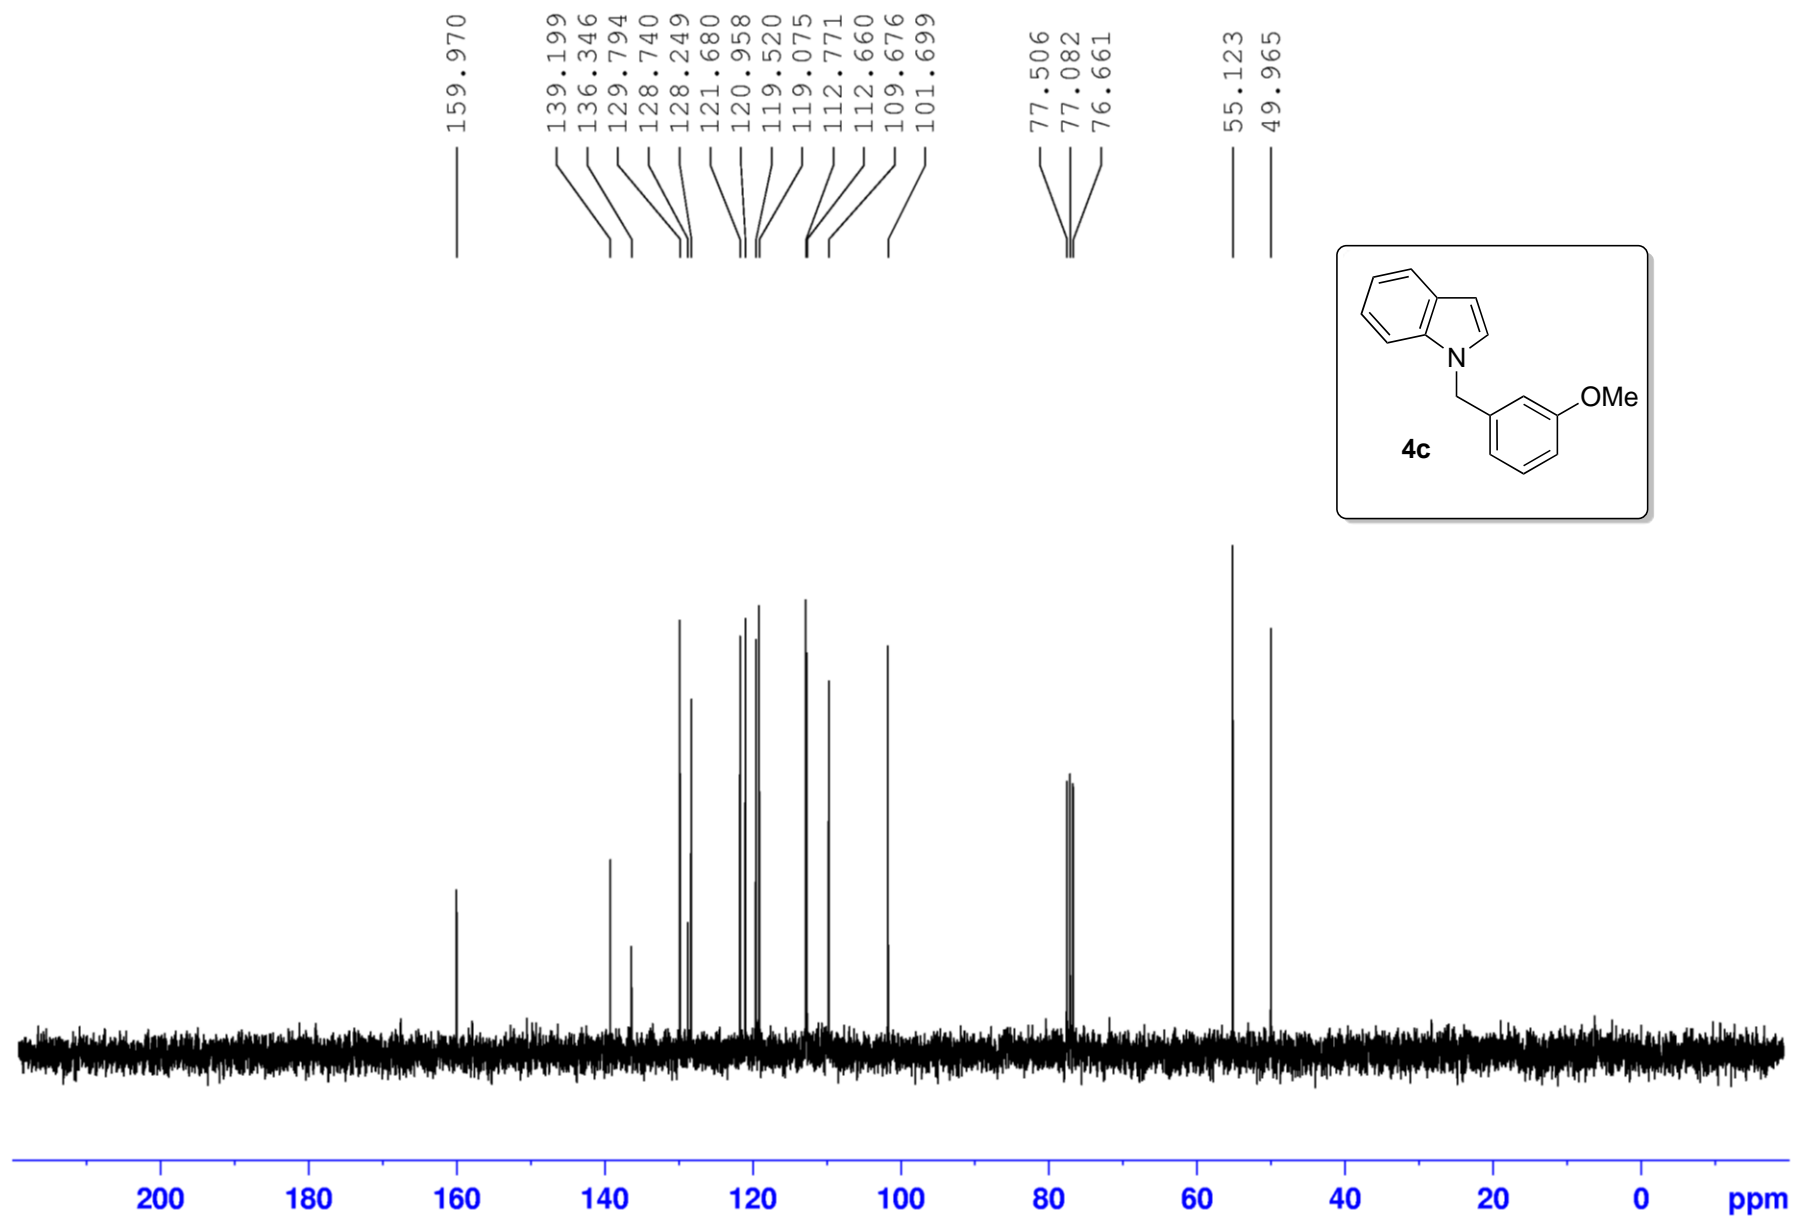

$^1\text{H}$  NMR ( $\text{CDCl}_3$ , 300 MHz) spectrum of 1-(4-cyanobenzyl)-1*H*-indole (**4d**)

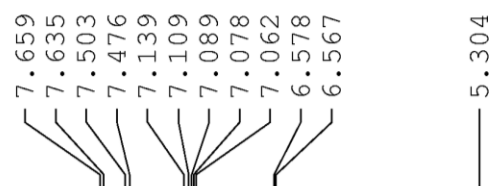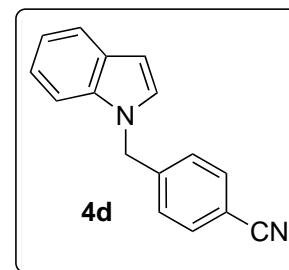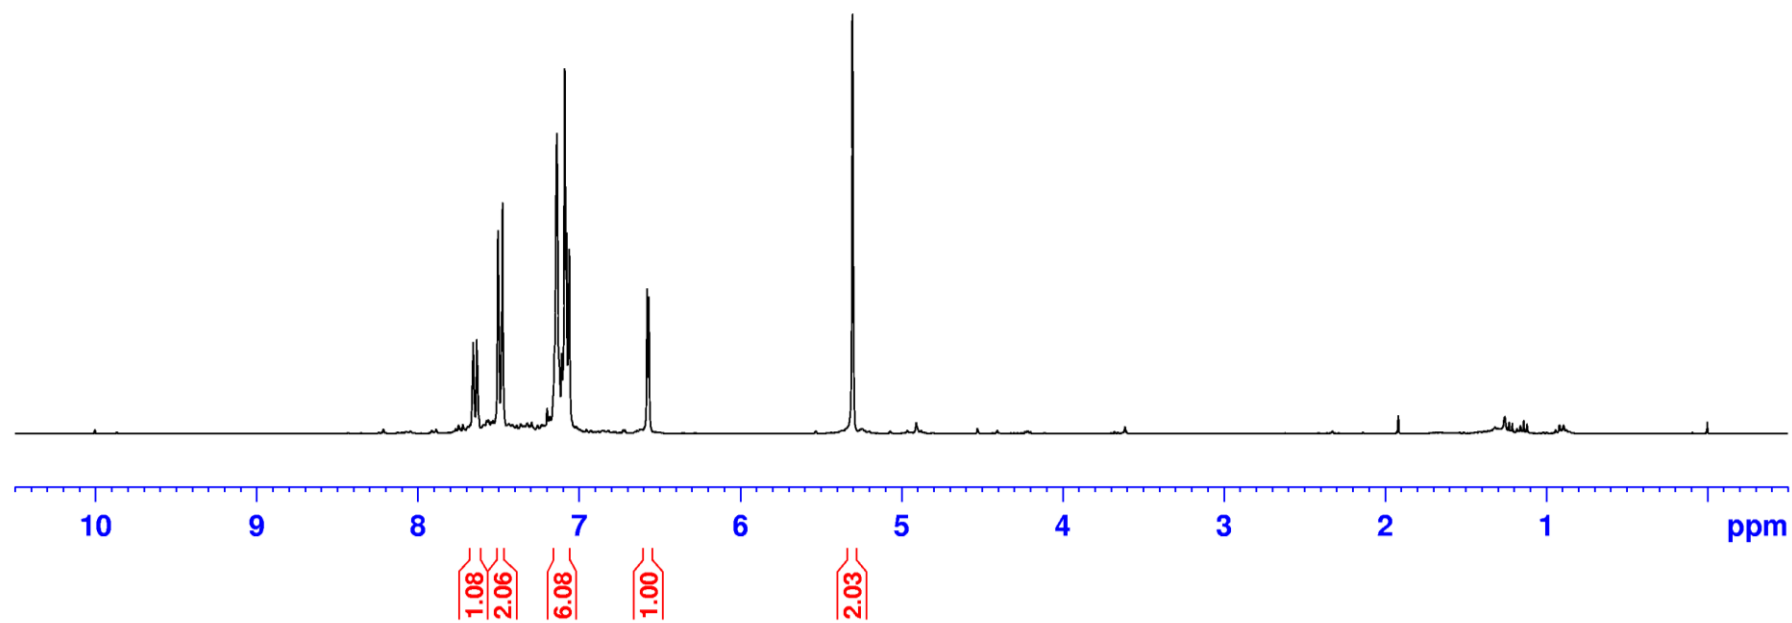

$^{13}\text{C}$  NMR ( $\text{CDCl}_3$ , 75.4 MHz) spectrum of 1-(4-cyanobenzyl)-1H-indole (**4d**)

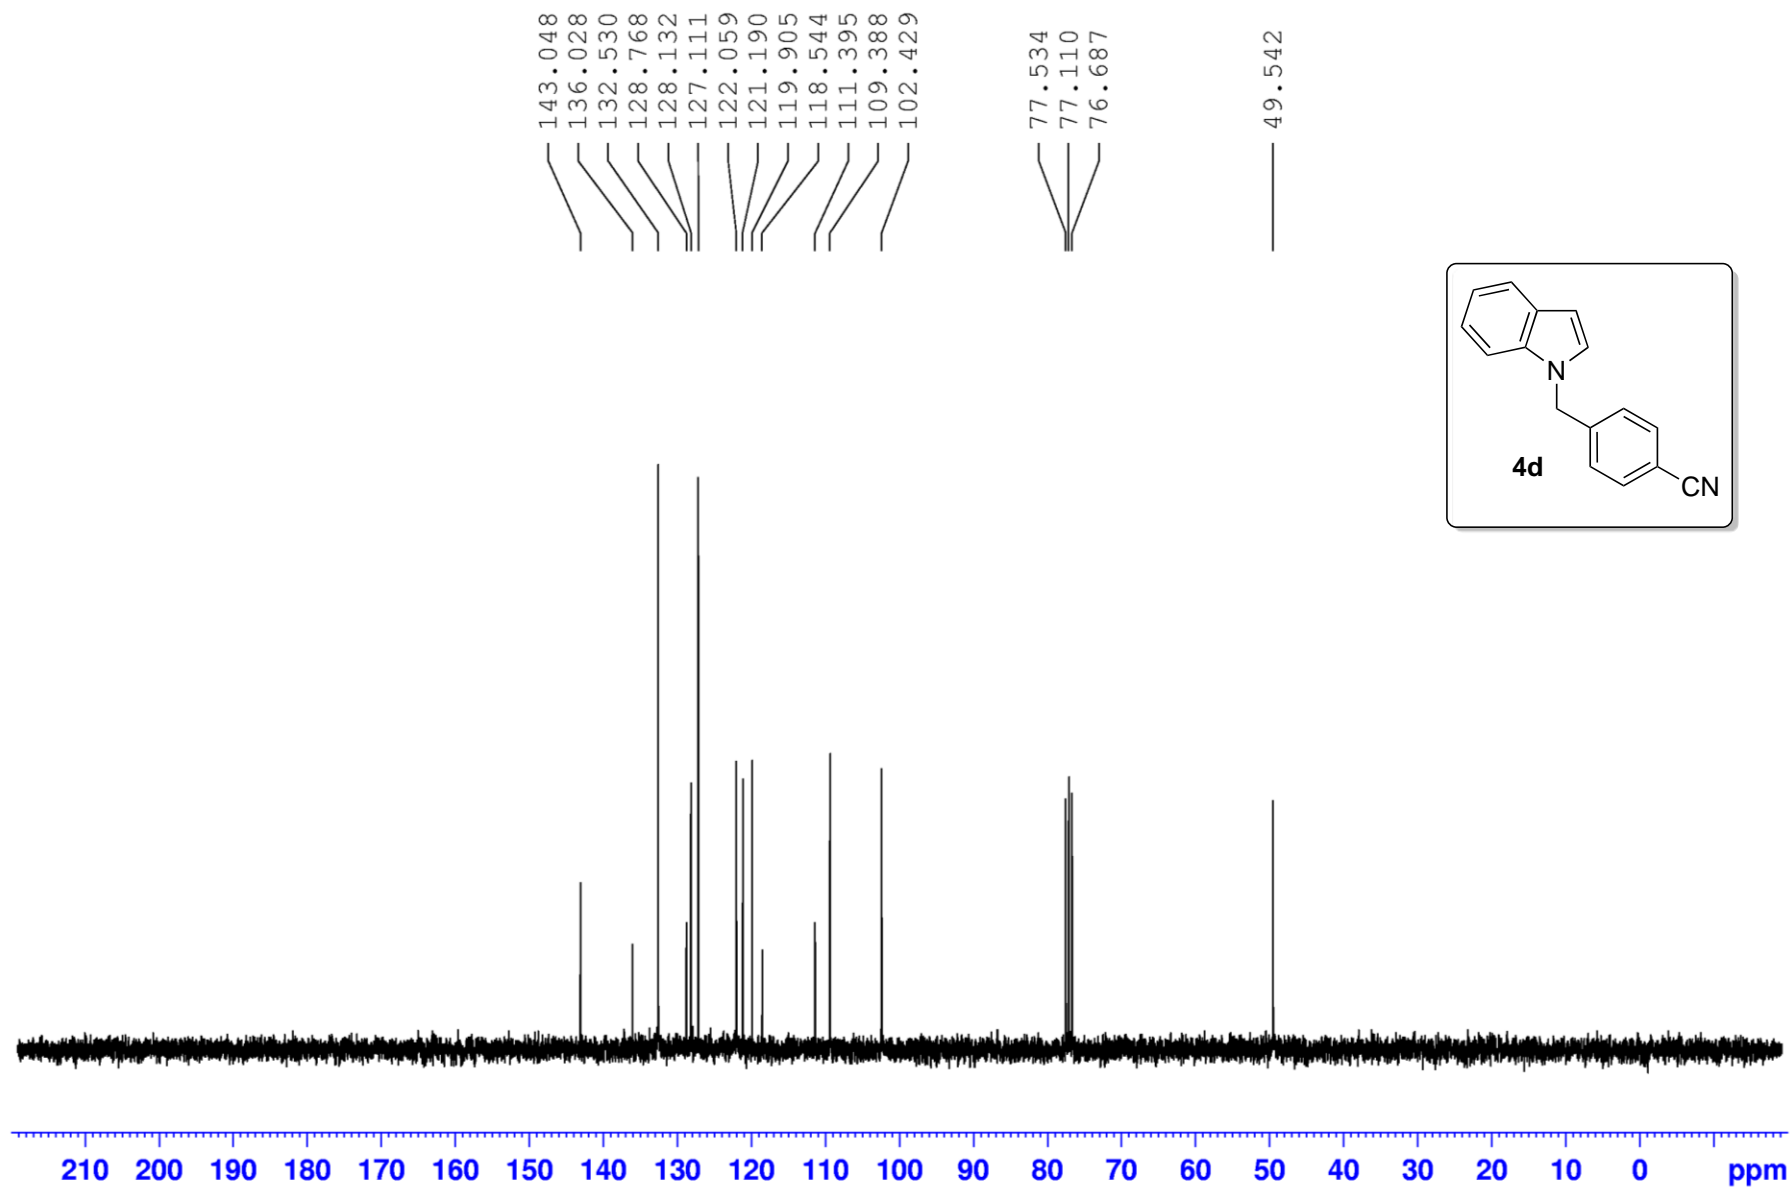

$^1\text{H}$  NMR ( $\text{CDCl}_3$ , 360 MHz) spectrum of 1-(2-cyanobenzyl)-1*H*-indole (**4e**)

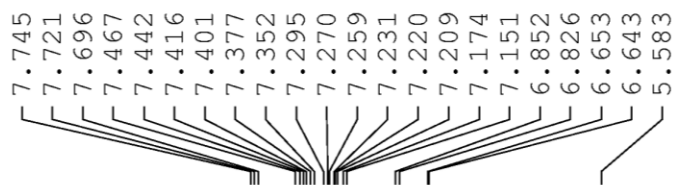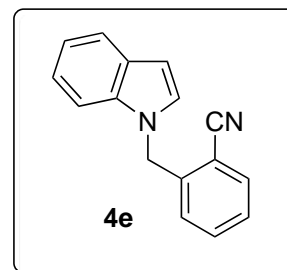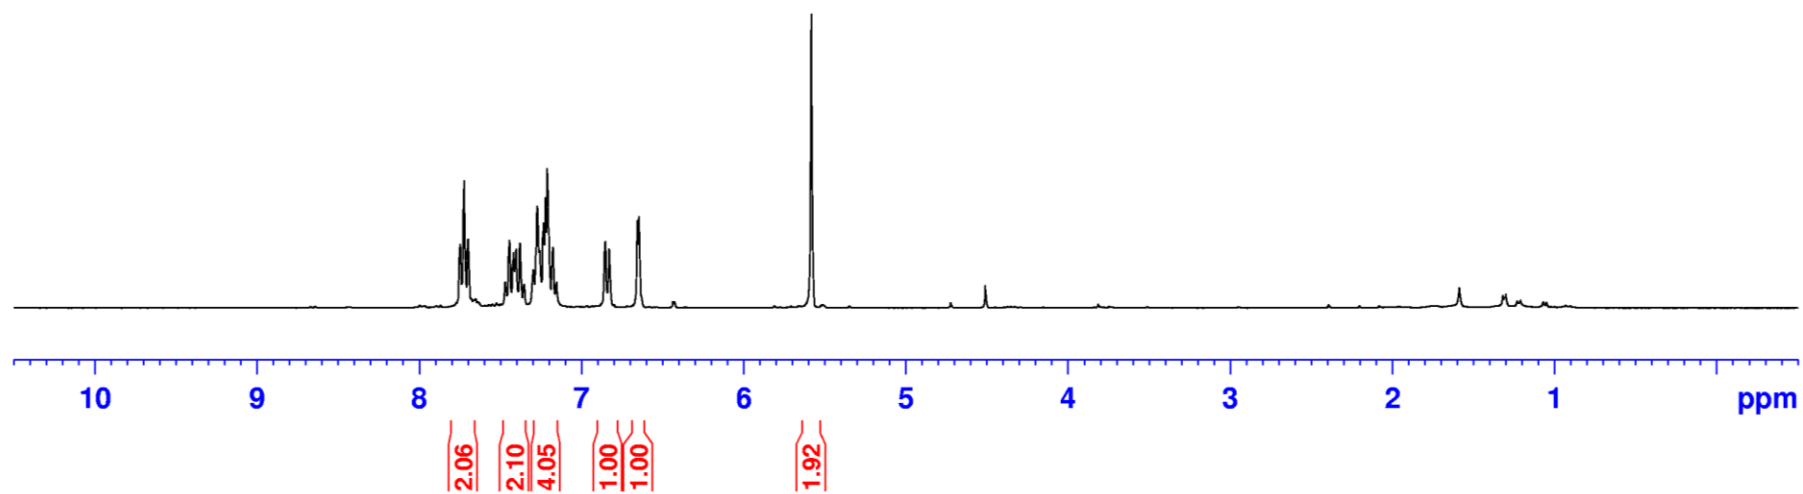

$^{13}\text{C}$  NMR ( $\text{CDCl}_3$ , 90.5 MHz) spectrum of 1-(2-cyanobenzyl)-1*H*-indole (**4e**)

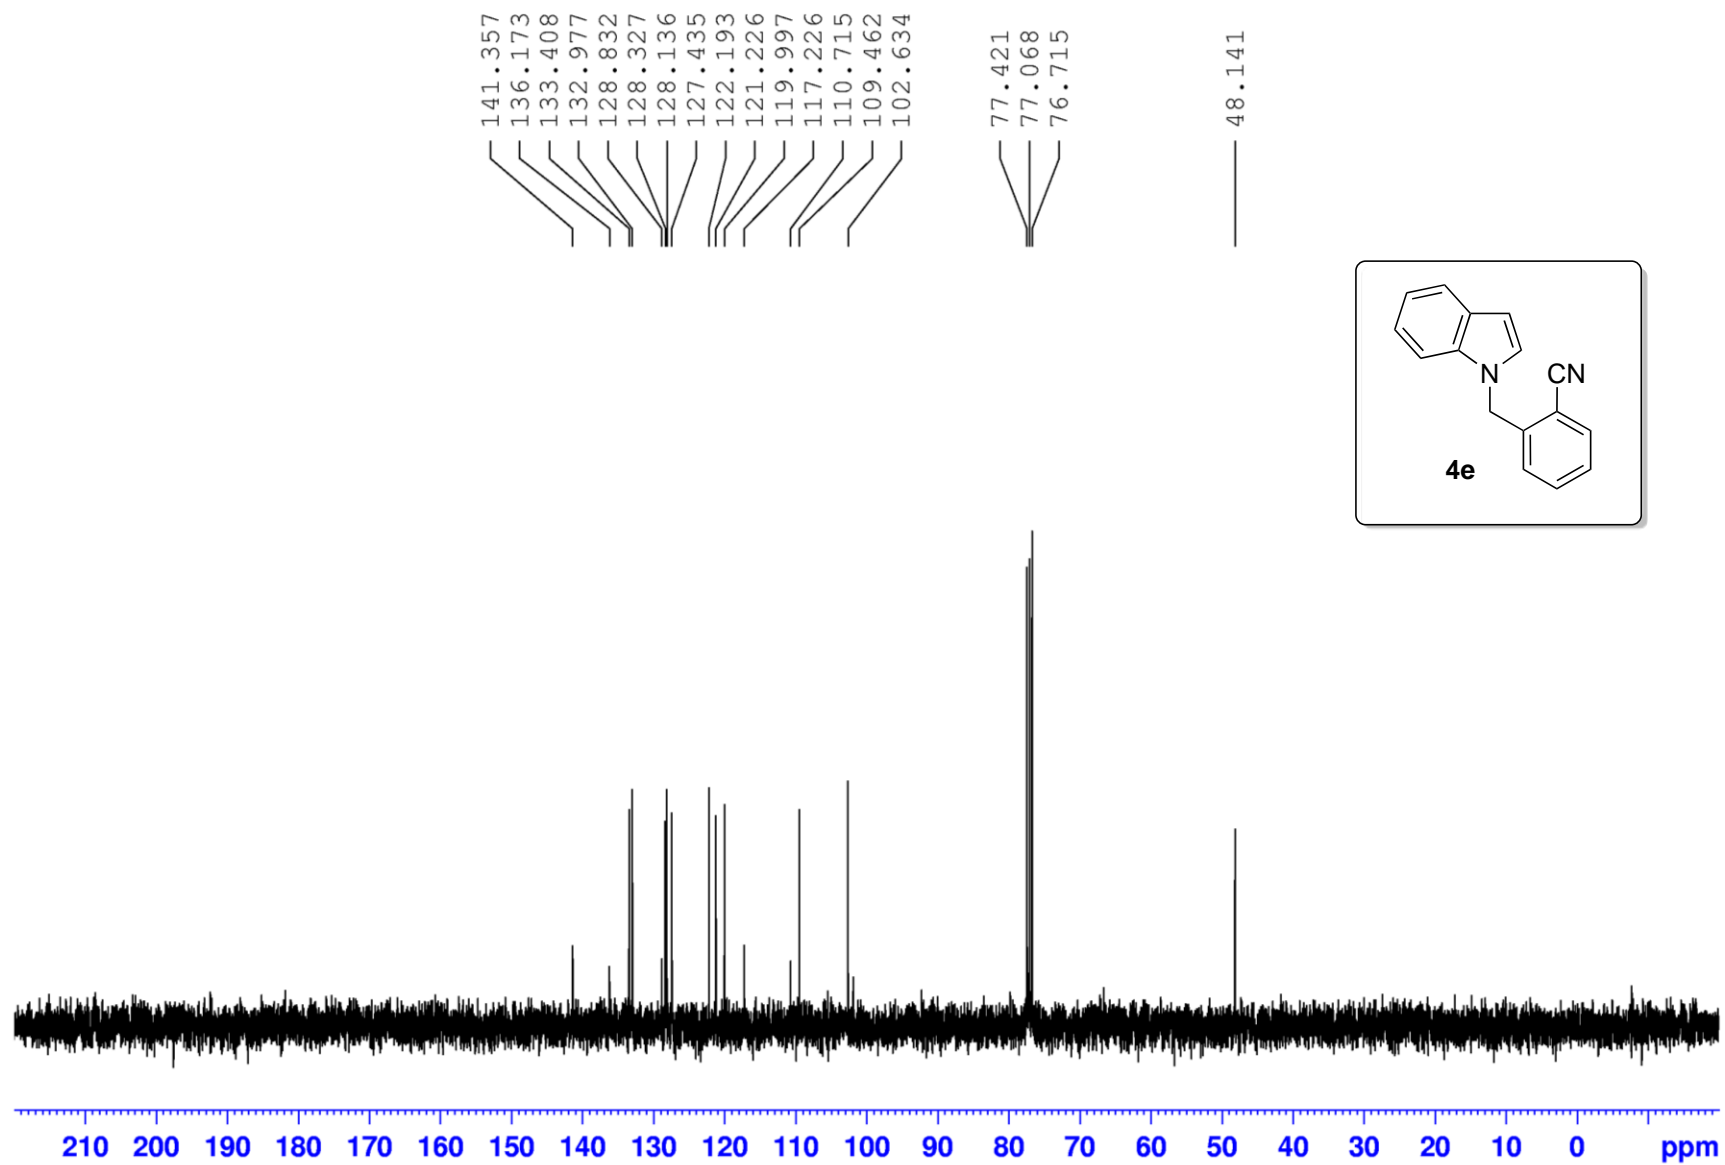

$^1\text{H}$  NMR ( $\text{CDCl}_3$ , 300 MHz) spectrum of 1-(3-cyanobenzyl)-1*H*-indole (**4f**)

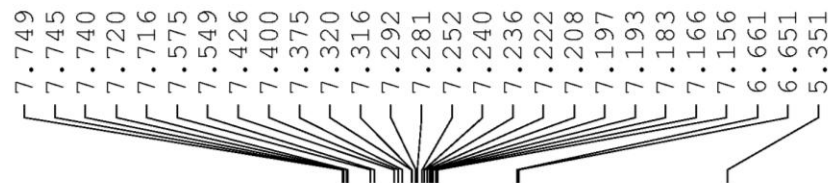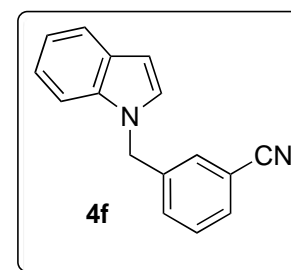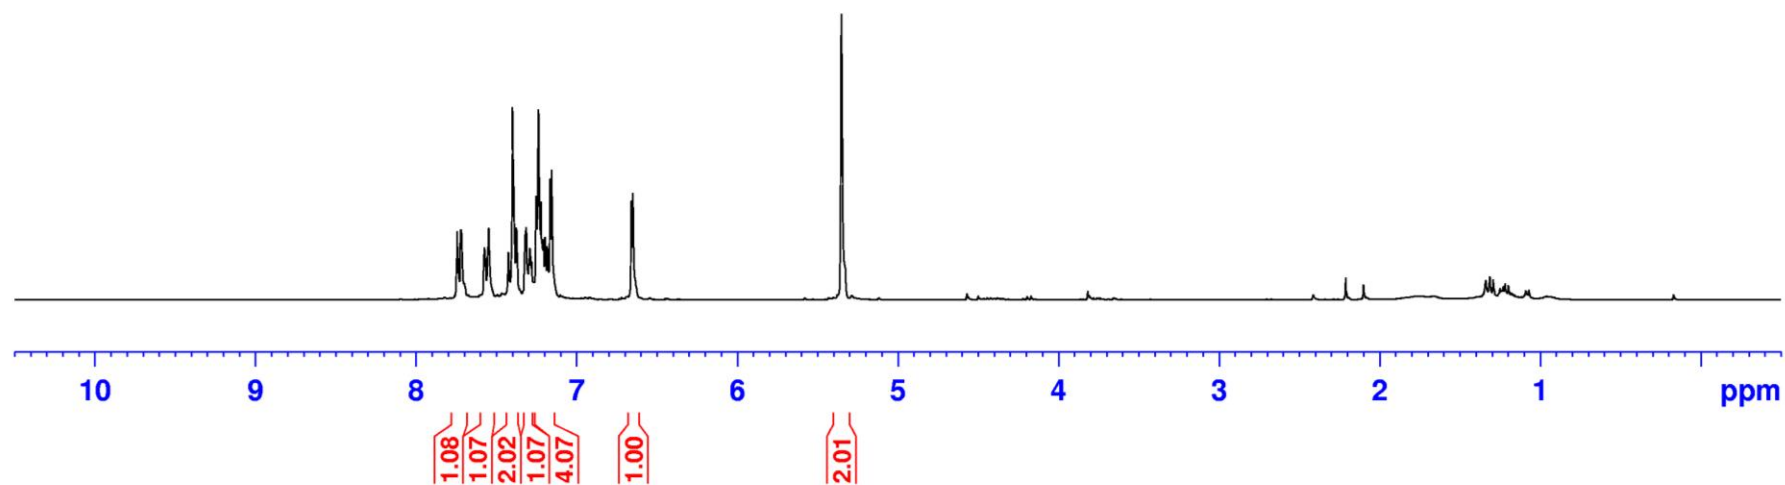

$^{13}\text{C}$  NMR ( $\text{CDCl}_3$ , 75.4 MHz) spectrum of 1-(3-cyanobenzyl)-1*H*-indole (**4f**)

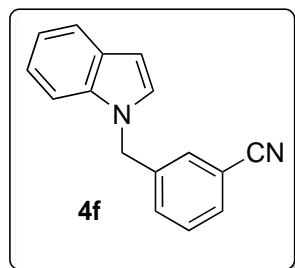

137.220  
136.247  
134.421  
129.343  
128.667  
128.114  
126.760  
121.550  
120.872  
119.394  
109.634  
101.490

77.388  
76.966  
76.542

49.803

21.004

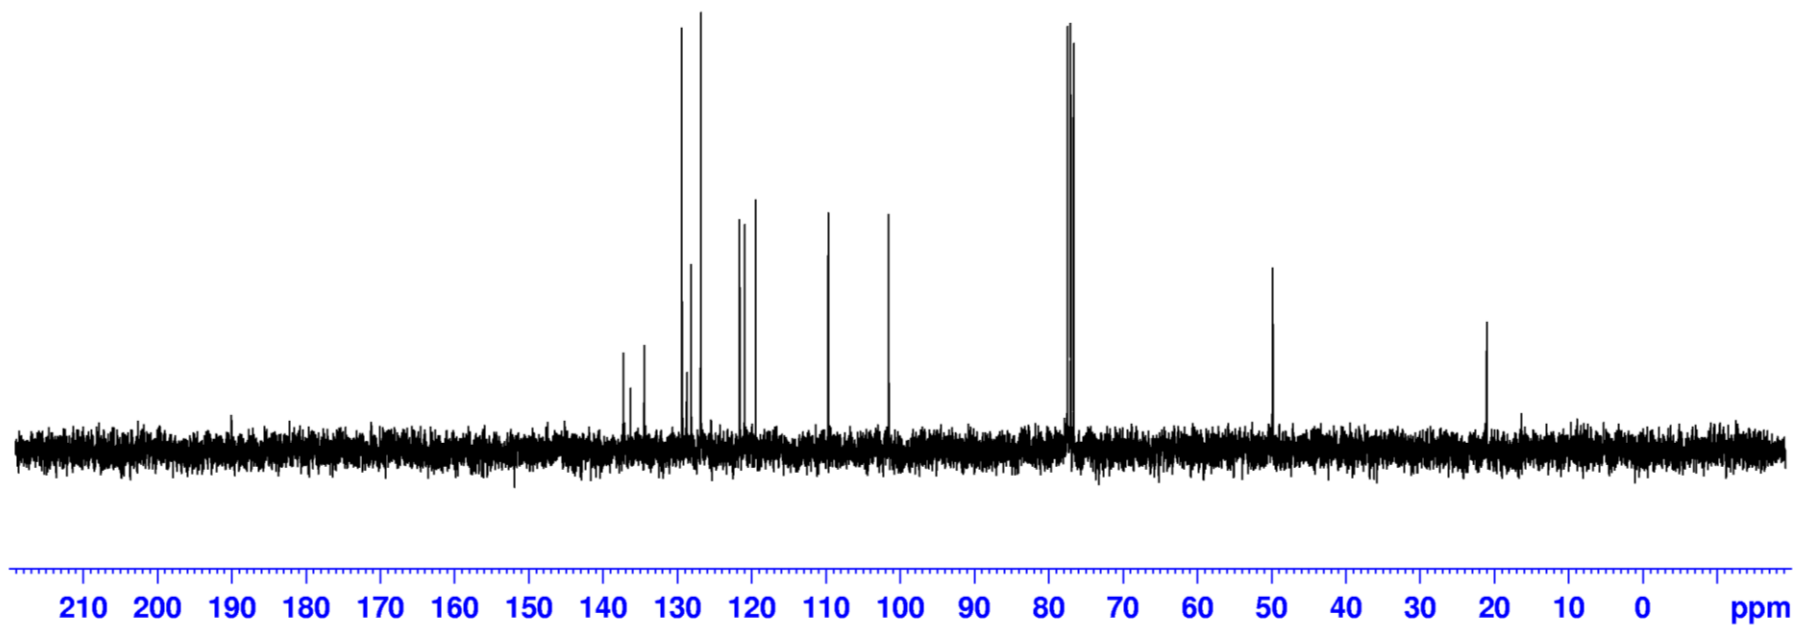

$^1\text{H}$  NMR ( $\text{CDCl}_3$ , 300 MHz) spectrum of 4-((1*H*-indol-1-yl)methyl)benzaldehyde (**4g**)

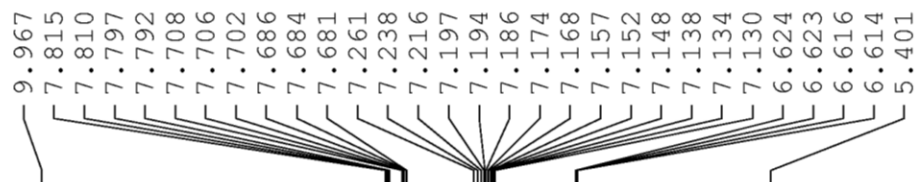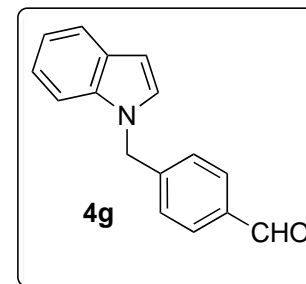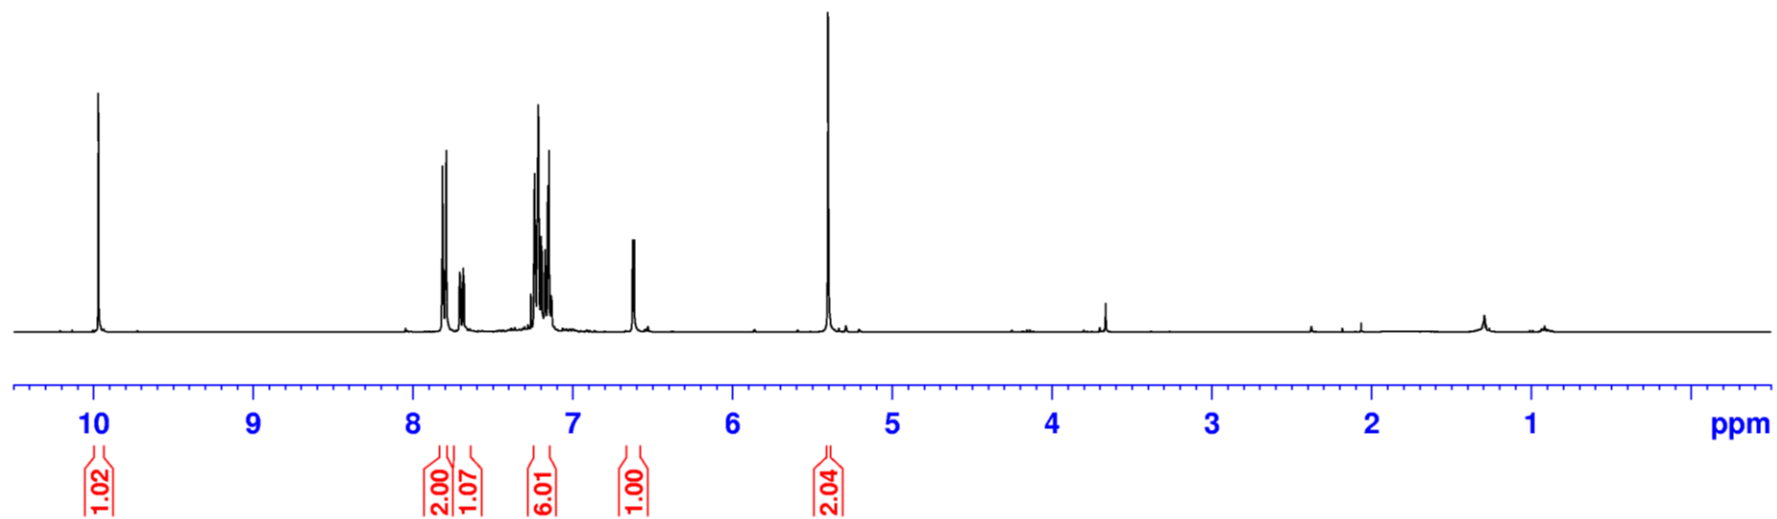



$^{13}\text{C}$  NMR ( $\text{CDCl}_3$ , 90.5 MHz) spectrum of 4-((1*H*-indol-1-yl)methyl)benzaldehyde (**4g**)

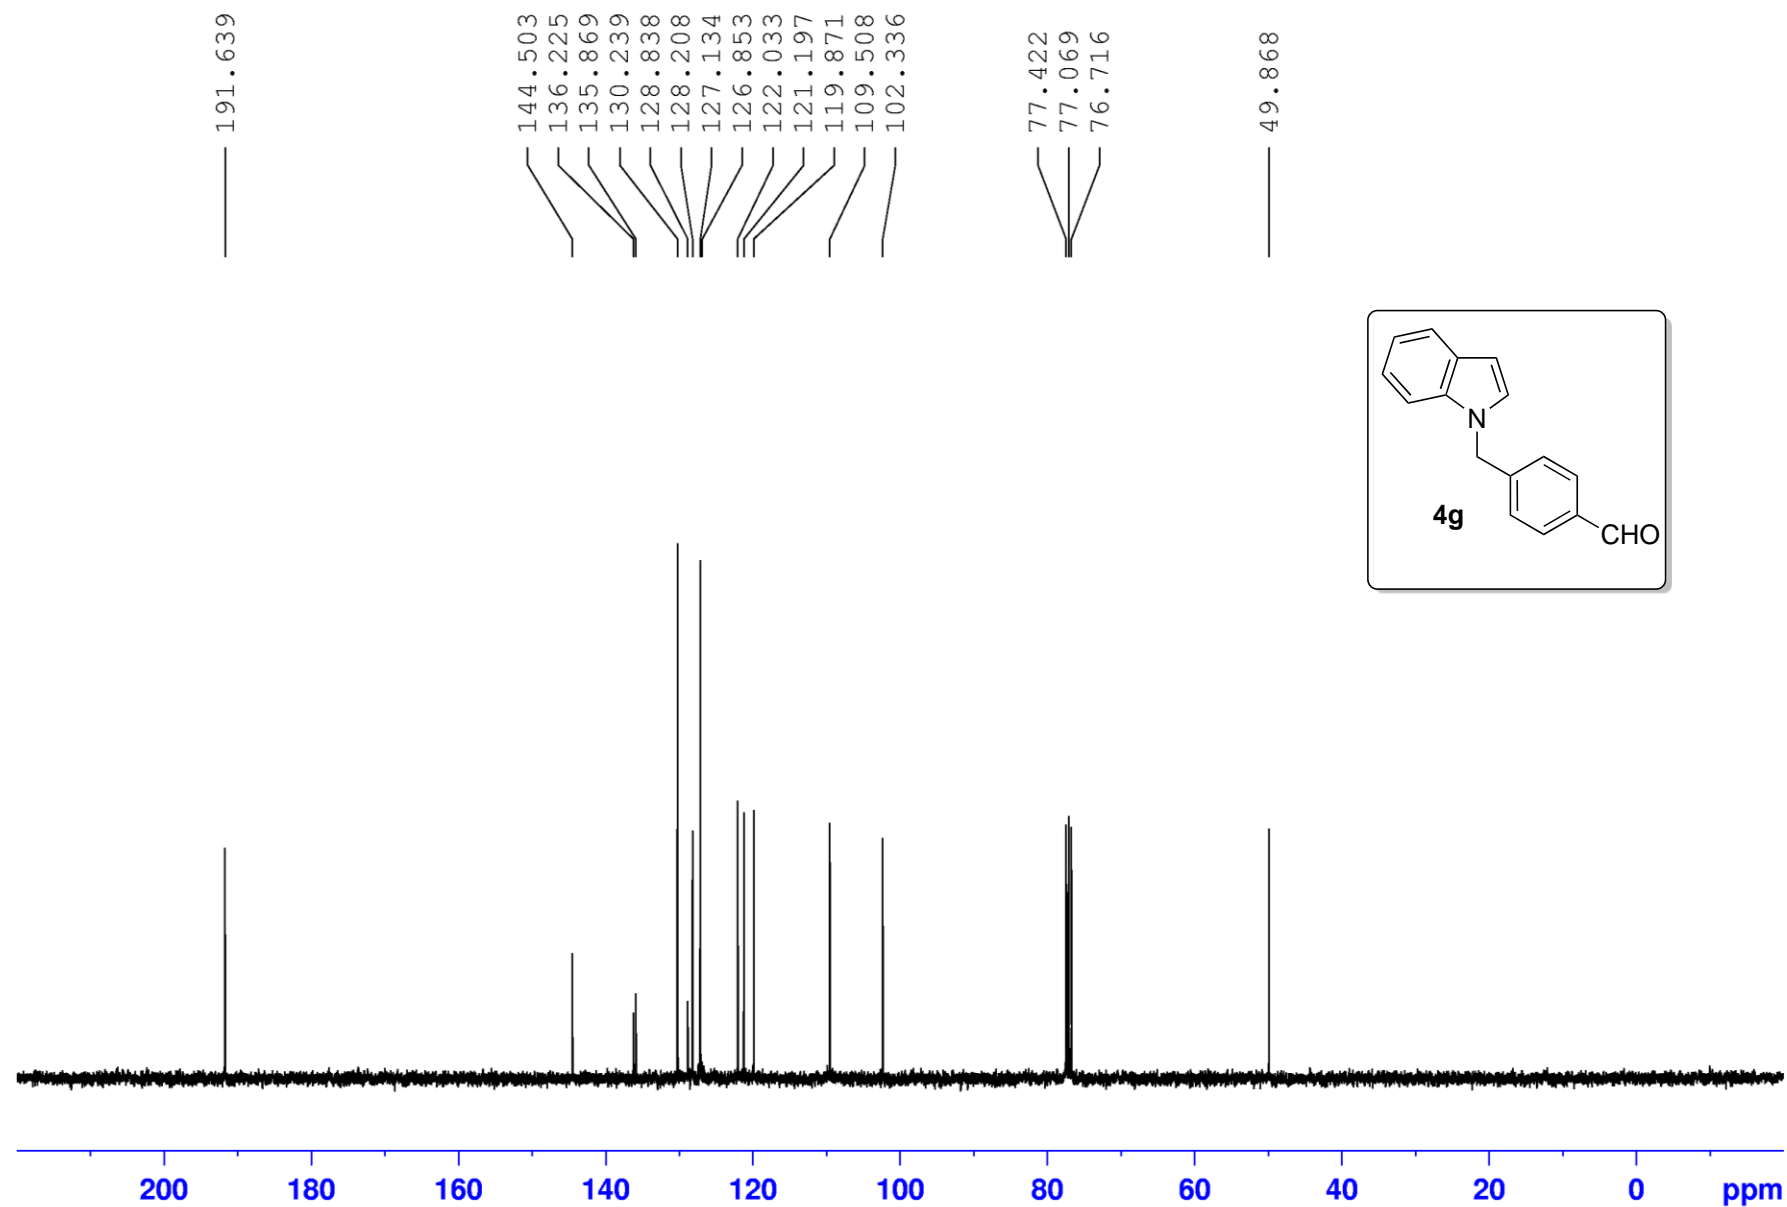

$^1\text{H}$  NMR ( $\text{CDCl}_3$ , 300 MHz) spectrum of (4-((1*H*-indol-1-yl)methyl)phenyl)(phenyl)methanone (**4h**)

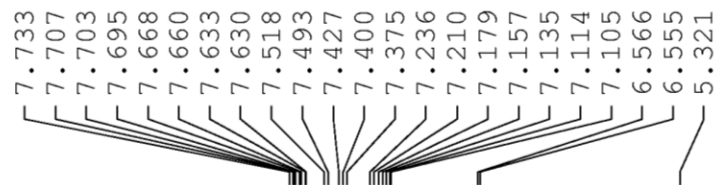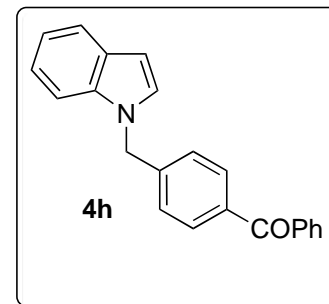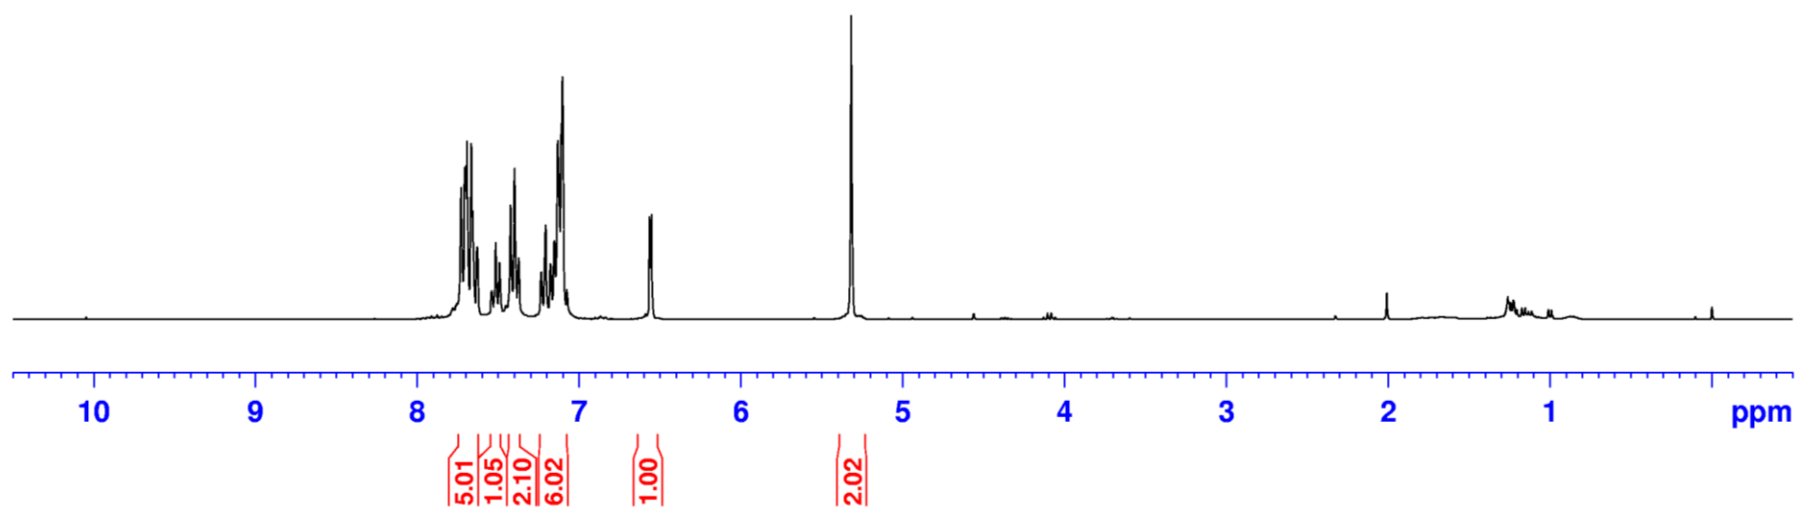

$^{13}\text{C}$  NMR ( $\text{CDCl}_3$ , 75.4 MHz) spectrum of (4-((1*H*-indol-1-yl)methyl)phenyl)(phenyl)methanone (**4h**)

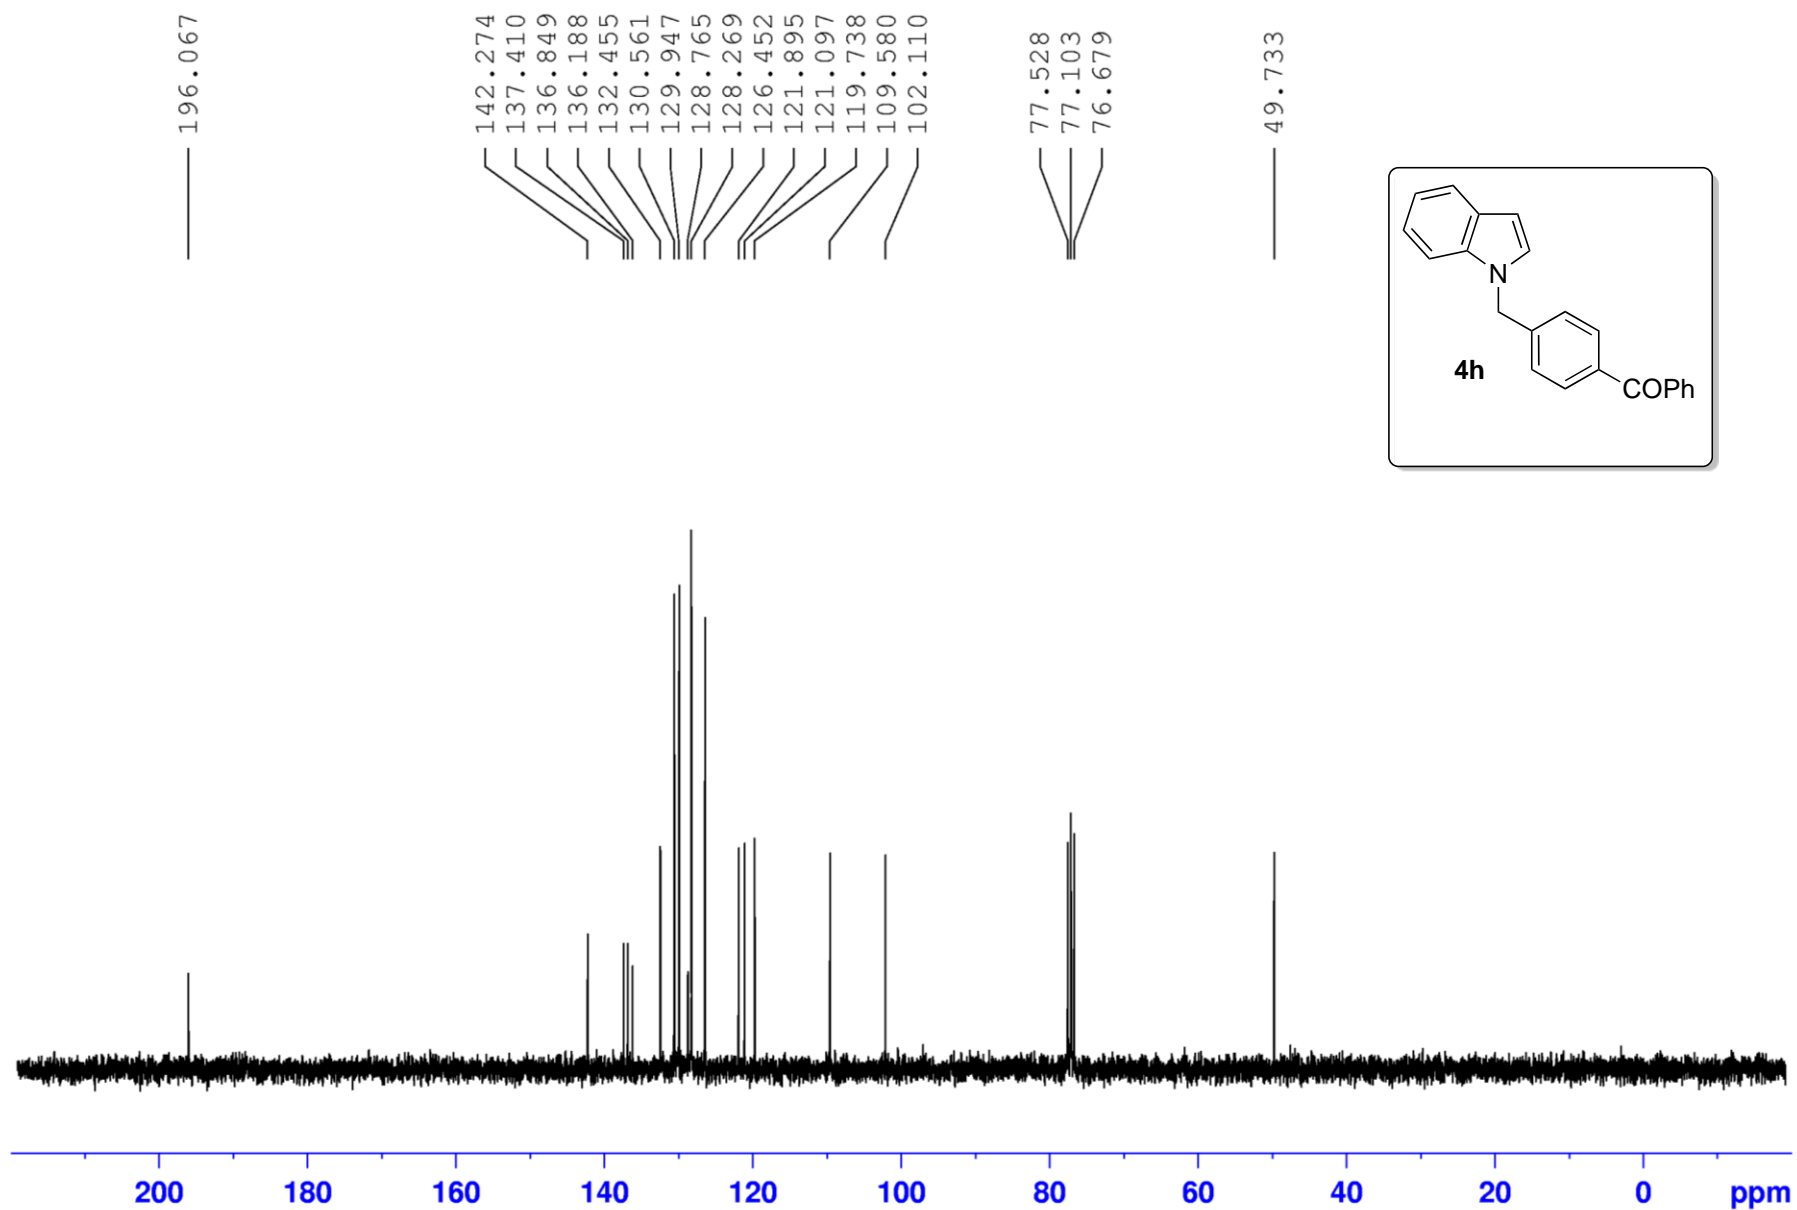

$^1\text{H}$  NMR ( $\text{CDCl}_3$ , 500 MHz) spectrum of methyl-4-((1*H*-indol-1-yl)methyl)benzoate (**4i**)

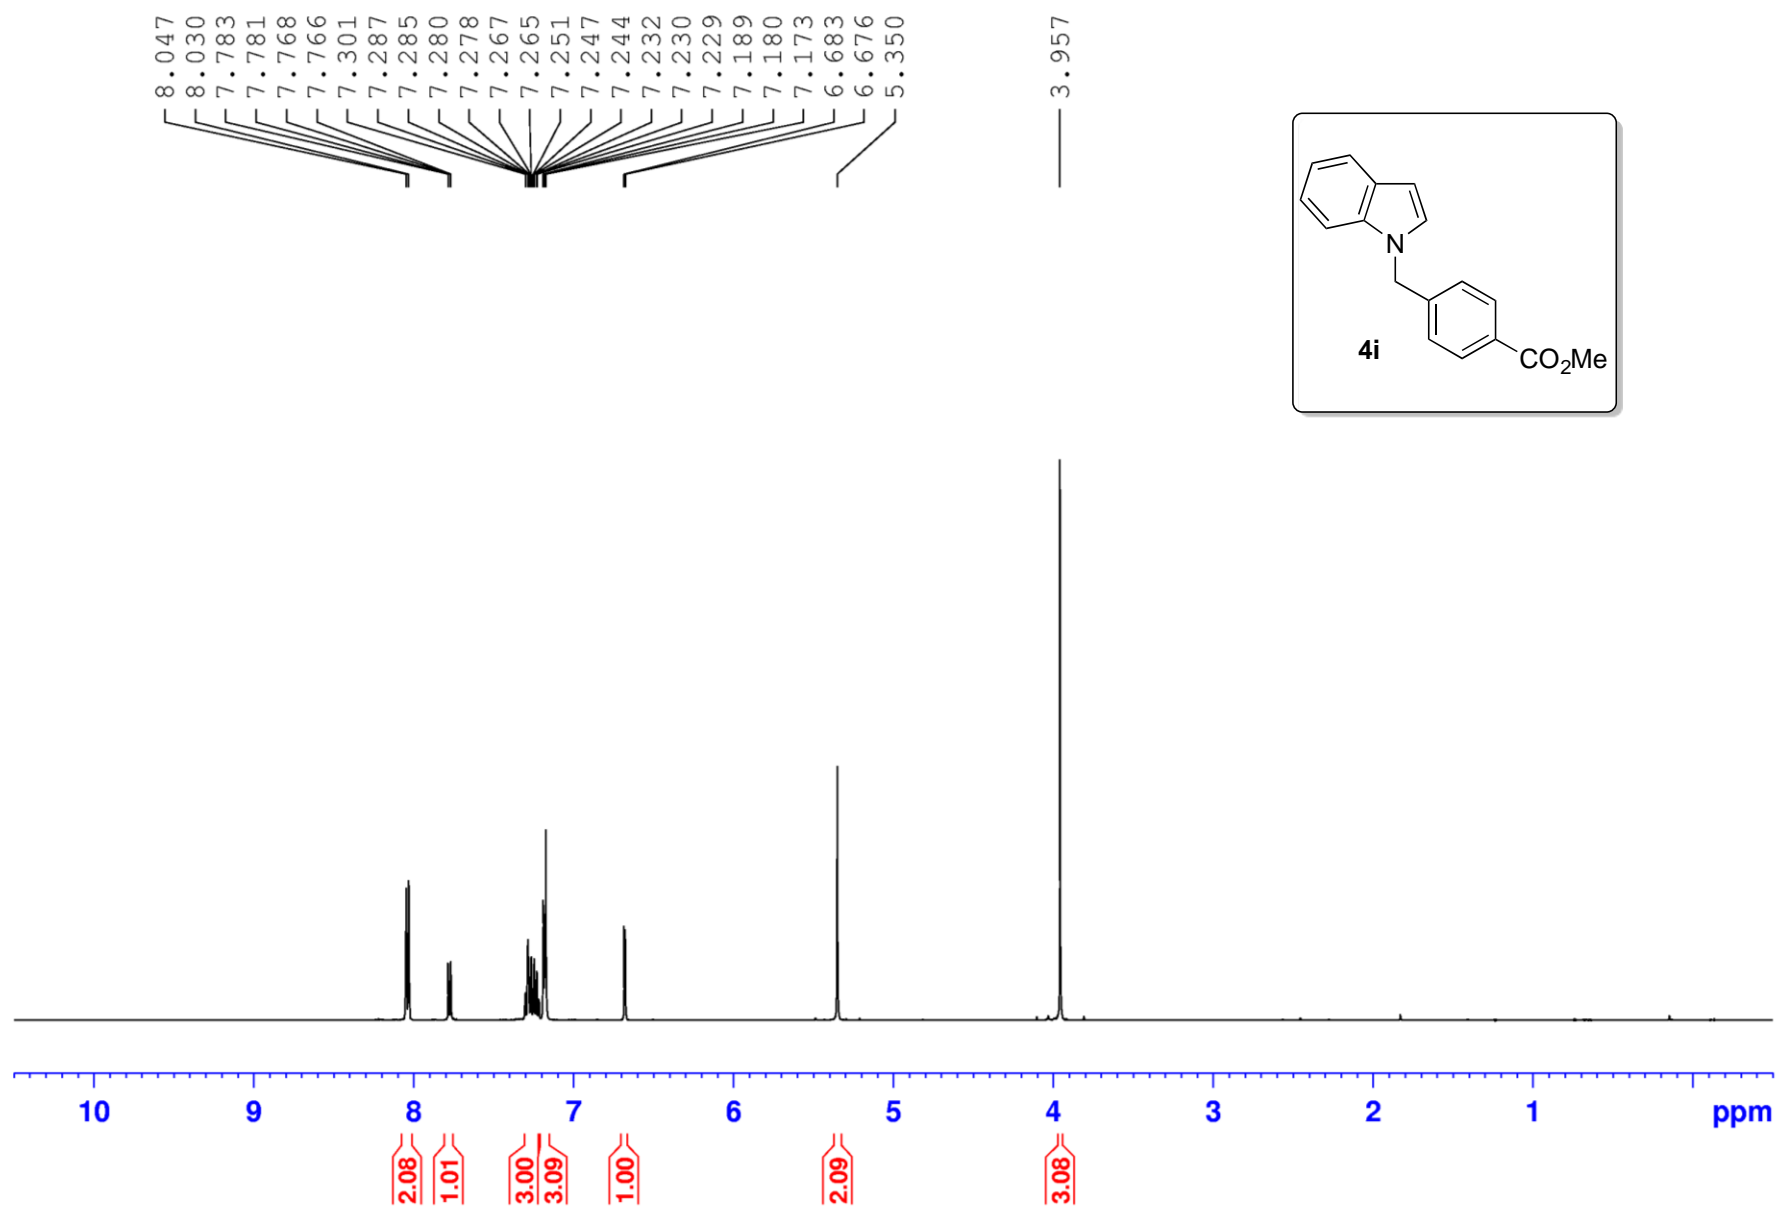

$^{13}\text{C}$  NMR ( $\text{CDCl}_3$ , 125.8 MHz) spectrum of methyl-4-((1*H*-indol-1-yl)methyl)benzoate (**4i**)

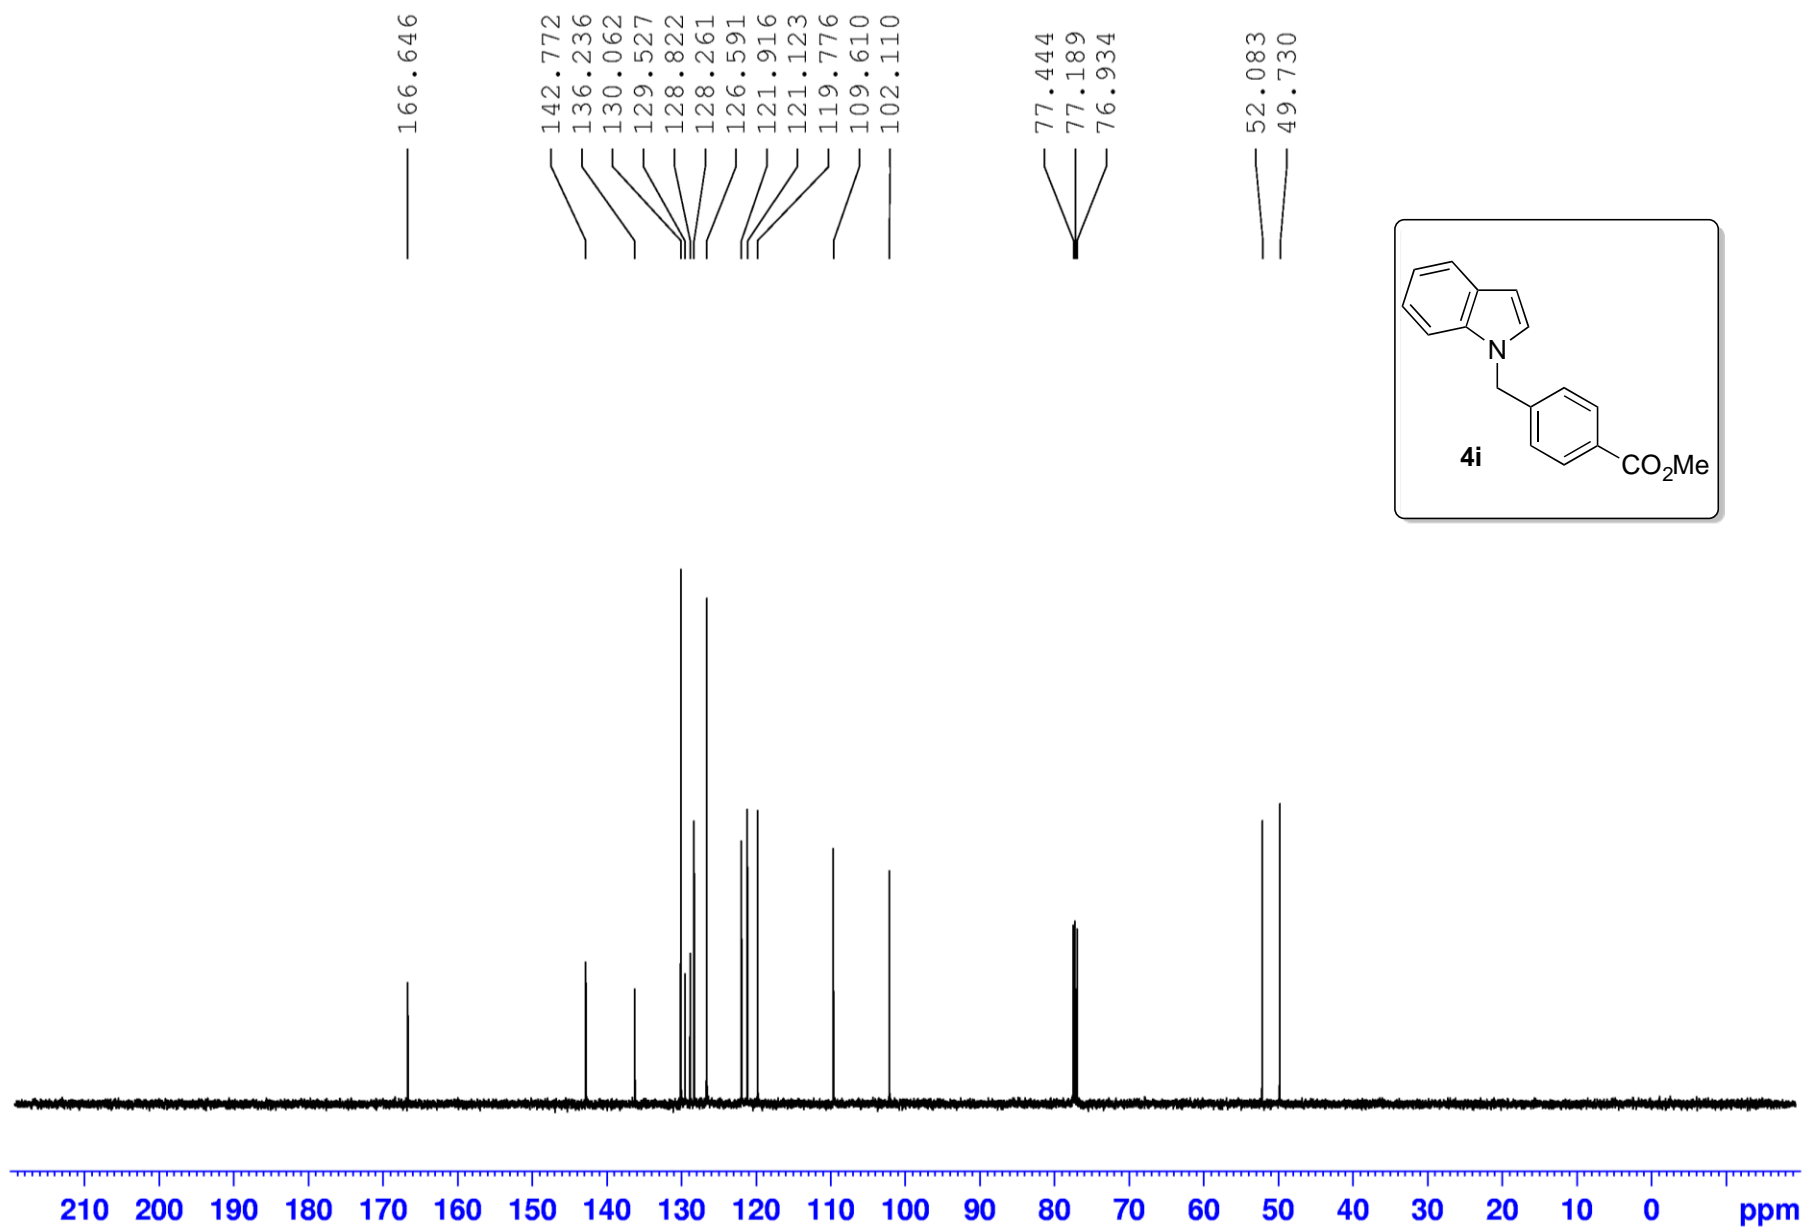

$^1\text{H}$  NMR ( $\text{CDCl}_3$ , 300 MHz) spectrum of 1-(4-fluorobenzyl)-1*H*-indole (**4j**)

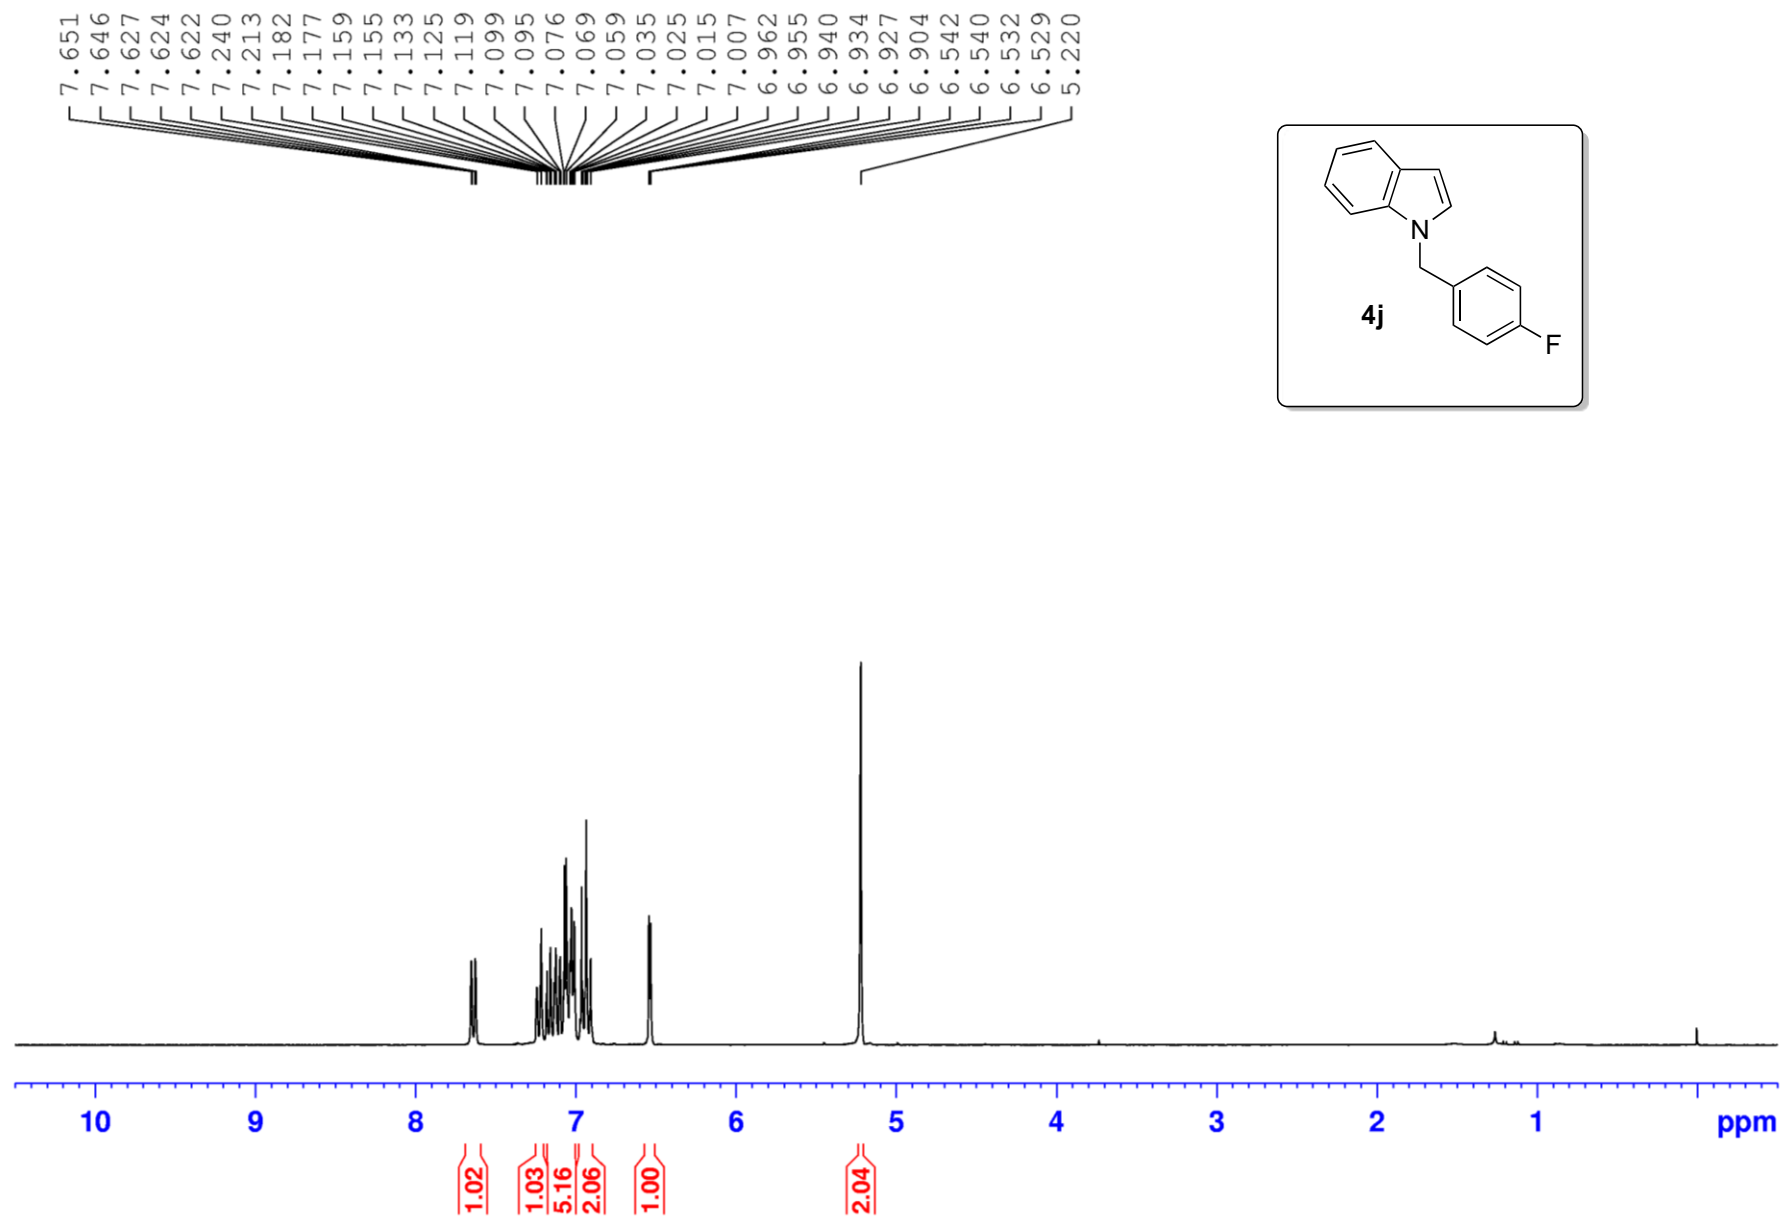

$^{13}\text{C}$  NMR ( $\text{CDCl}_3$ , 75.4 MHz) spectrum of 1-(4-fluorobenzyl)-1*H*-indole (**4j**)

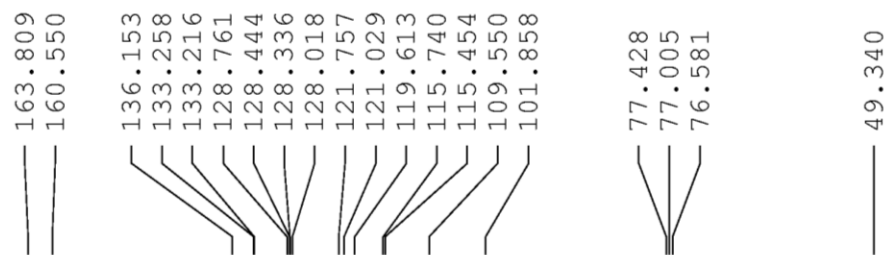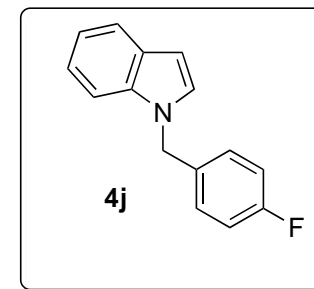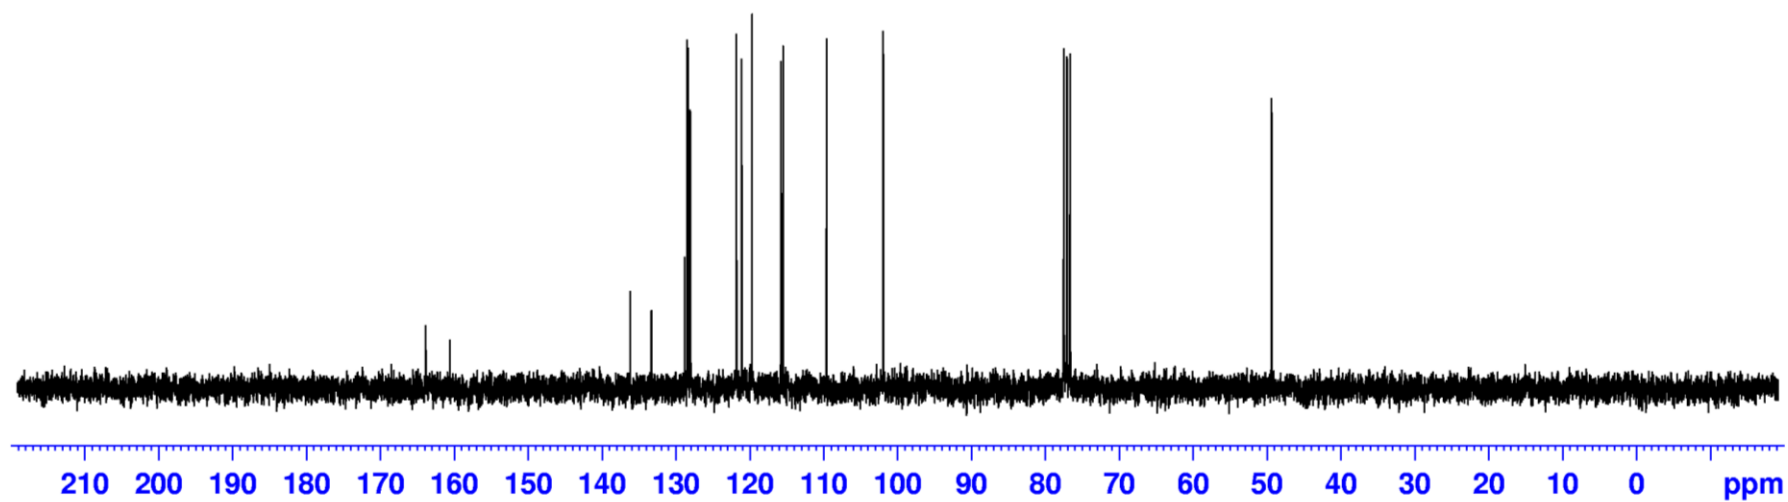

$^{19}\text{F}$  NMR ( $\text{CDCl}_3$ , 282.4 MHz) spectrum of 1-(4-fluorobenzyl)-1*H*-indole (**4j**)

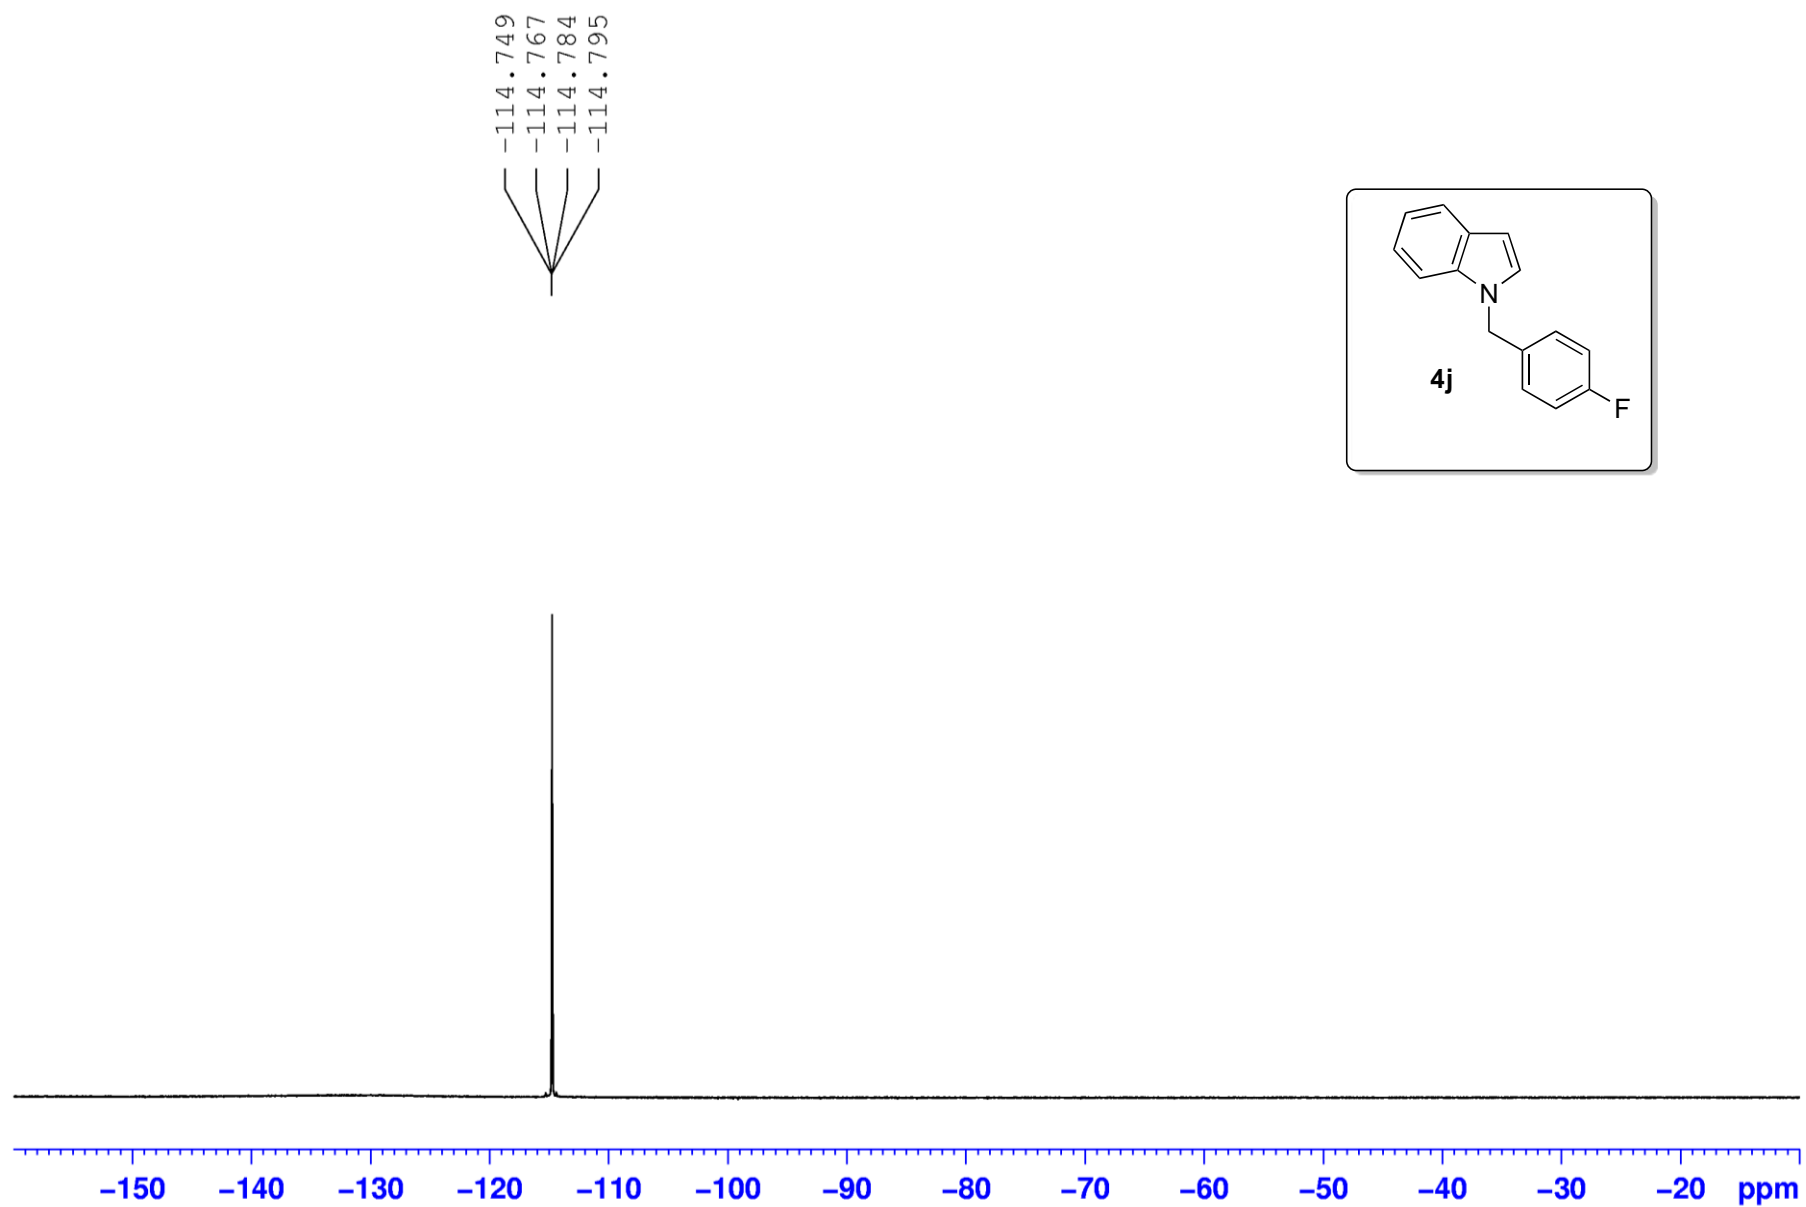



$^1\text{H}$  NMR ( $\text{CDCl}_3$ , 300 MHz) spectrum of 1-(4-(trifluoromethyl)benzyl)-1*H*-indole (**4k**)

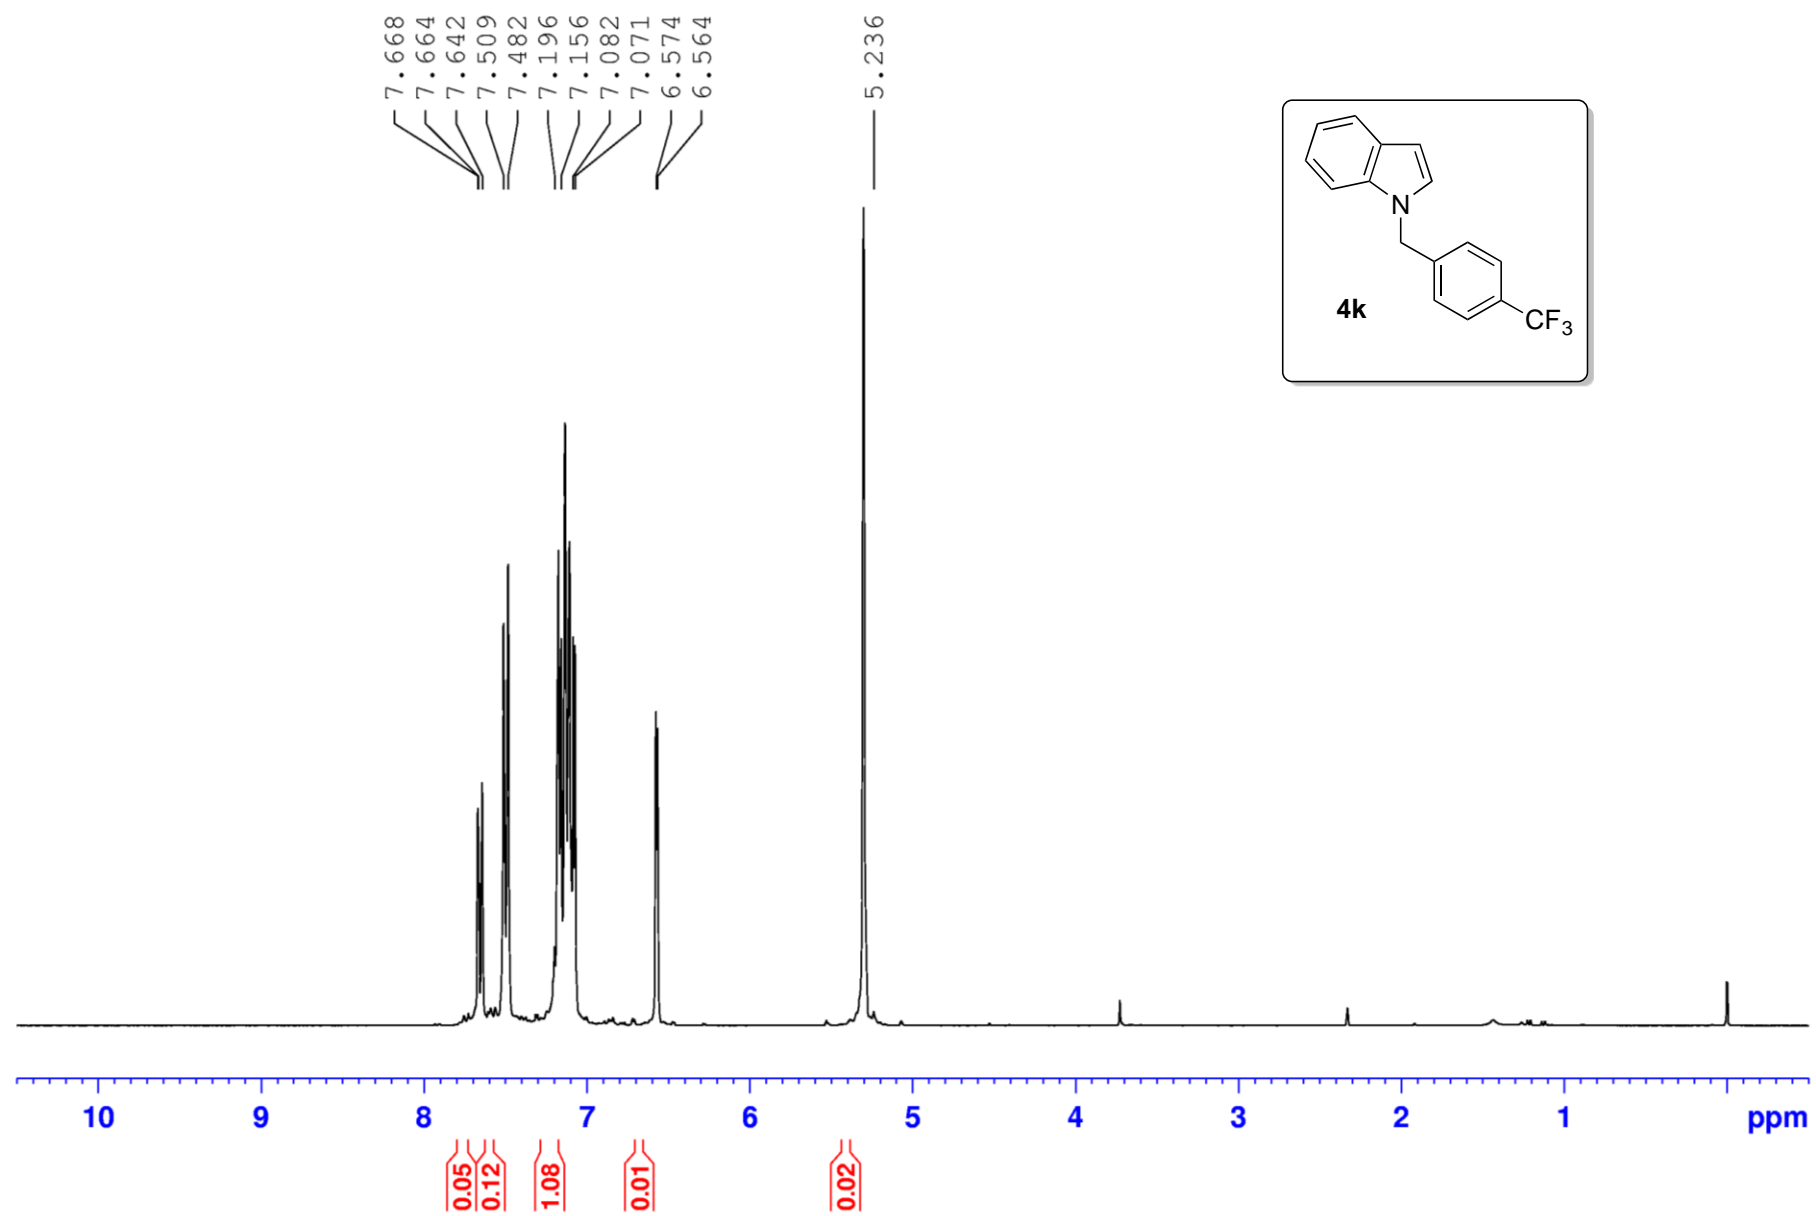

$^{13}\text{C}$  NMR ( $\text{CDCl}_3$ , 75.4 MHz) spectrum of 1-(4-(trifluoromethyl)benzyl)-1H-indole (**4k**)

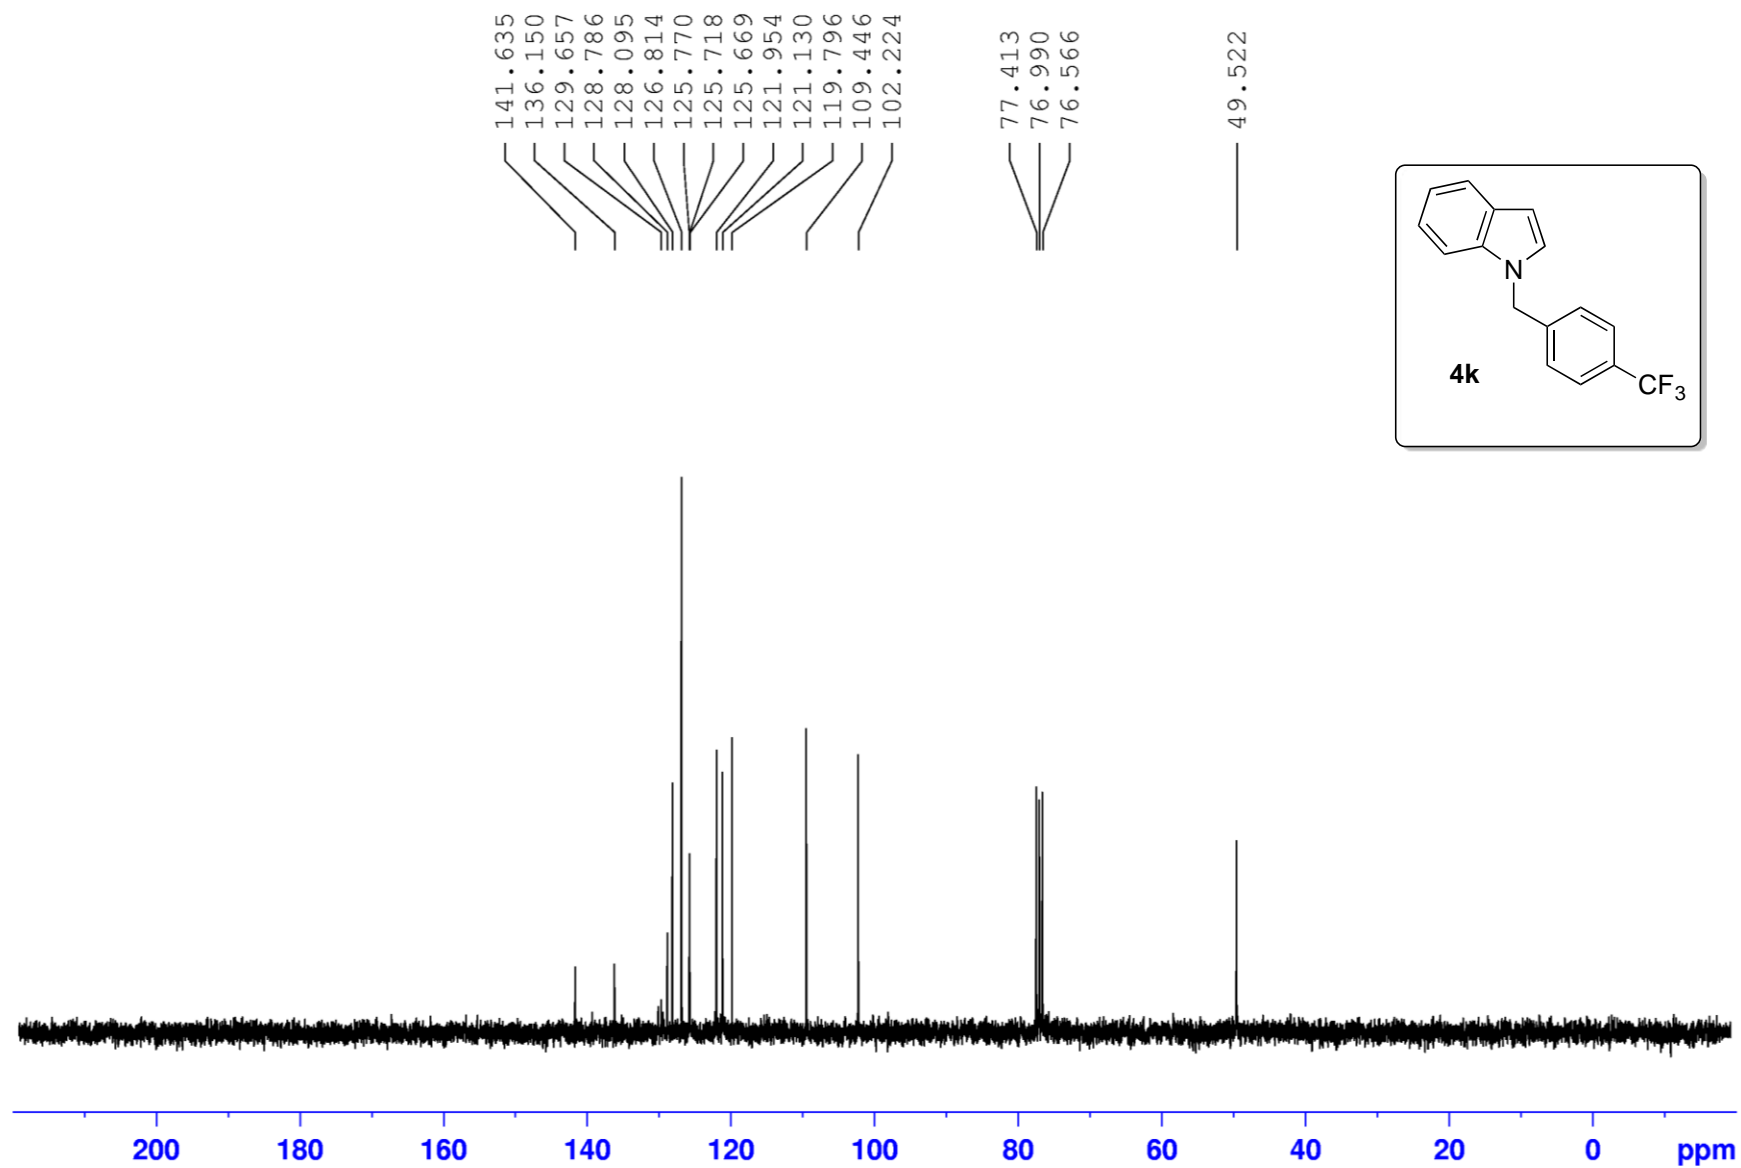

$^{19}\text{F}$  NMR ( $\text{CDCl}_3$ , 282.4 MHz) spectrum of 1-(4-(trifluoromethyl)benzyl)-1*H*-indole (**4k**)

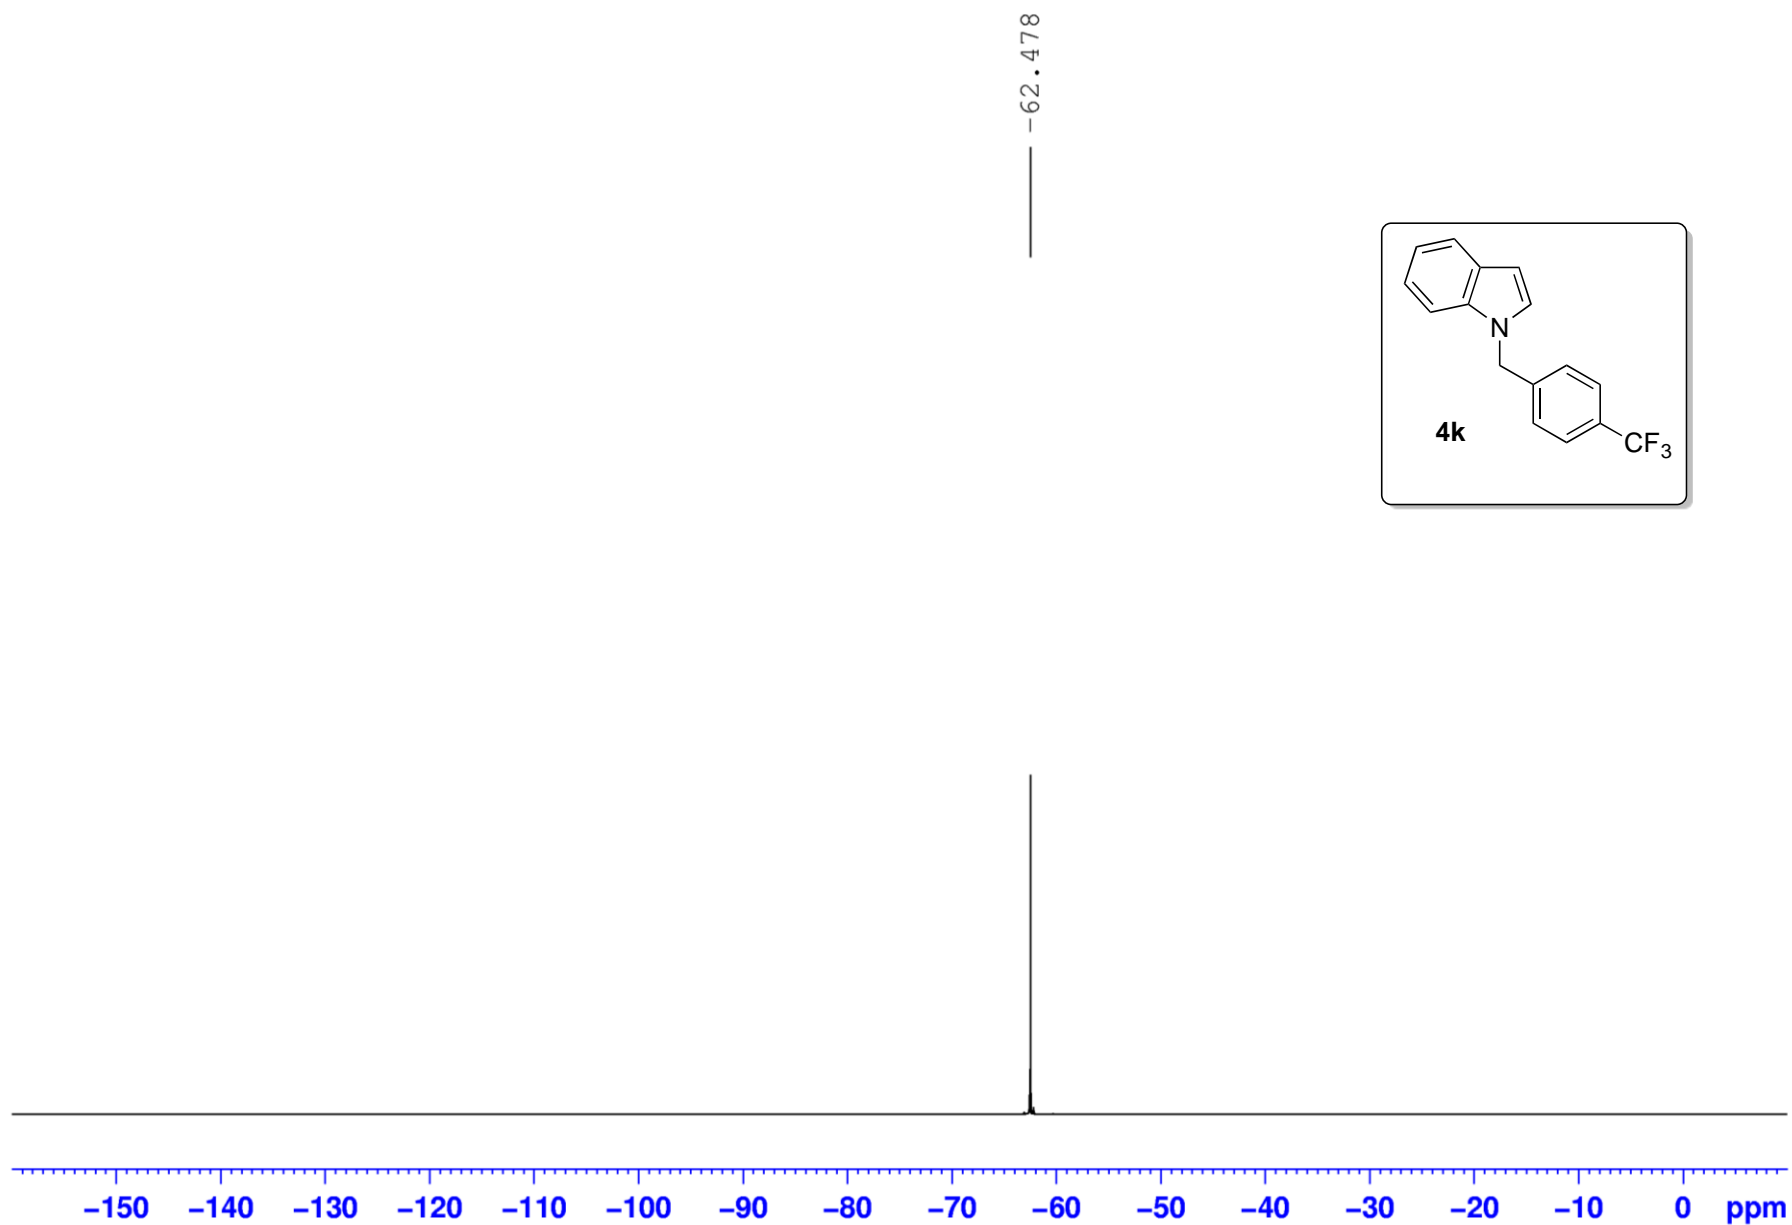

$^1\text{H}$  NMR ( $\text{CDCl}_3$ , 360 MHz) spectrum of 1-(4-nitrobenzyl)-1*H*-indole (**4I**)

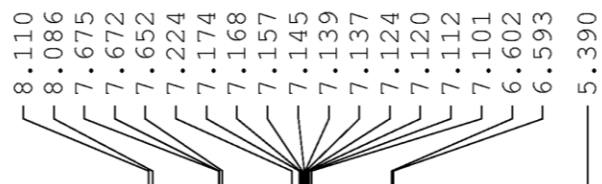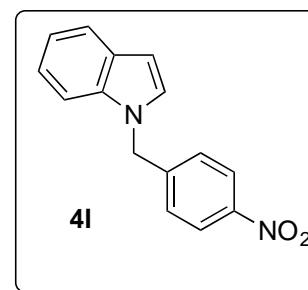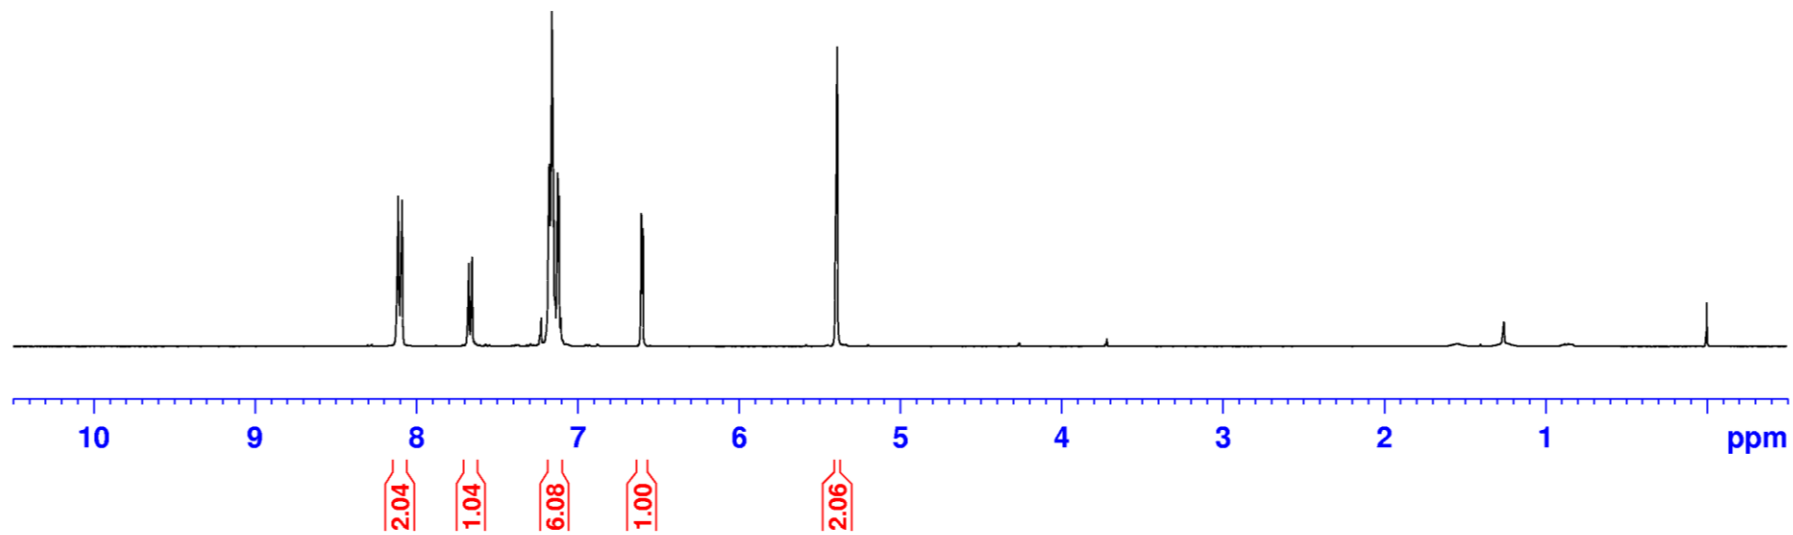

$^{13}\text{C}$  NMR ( $\text{CDCl}_3$ , 90.5 MHz) spectrum of 1-(4-nitrobenzyl)-1*H*-indole (**4I**)

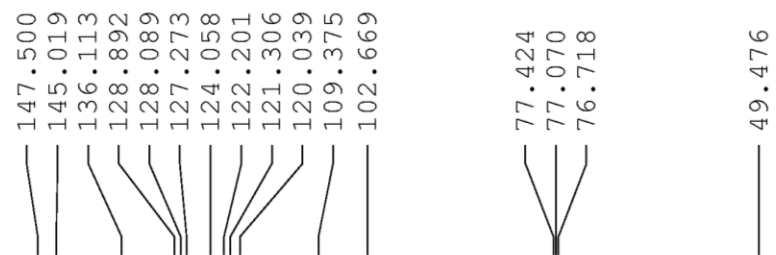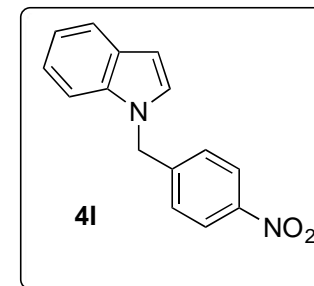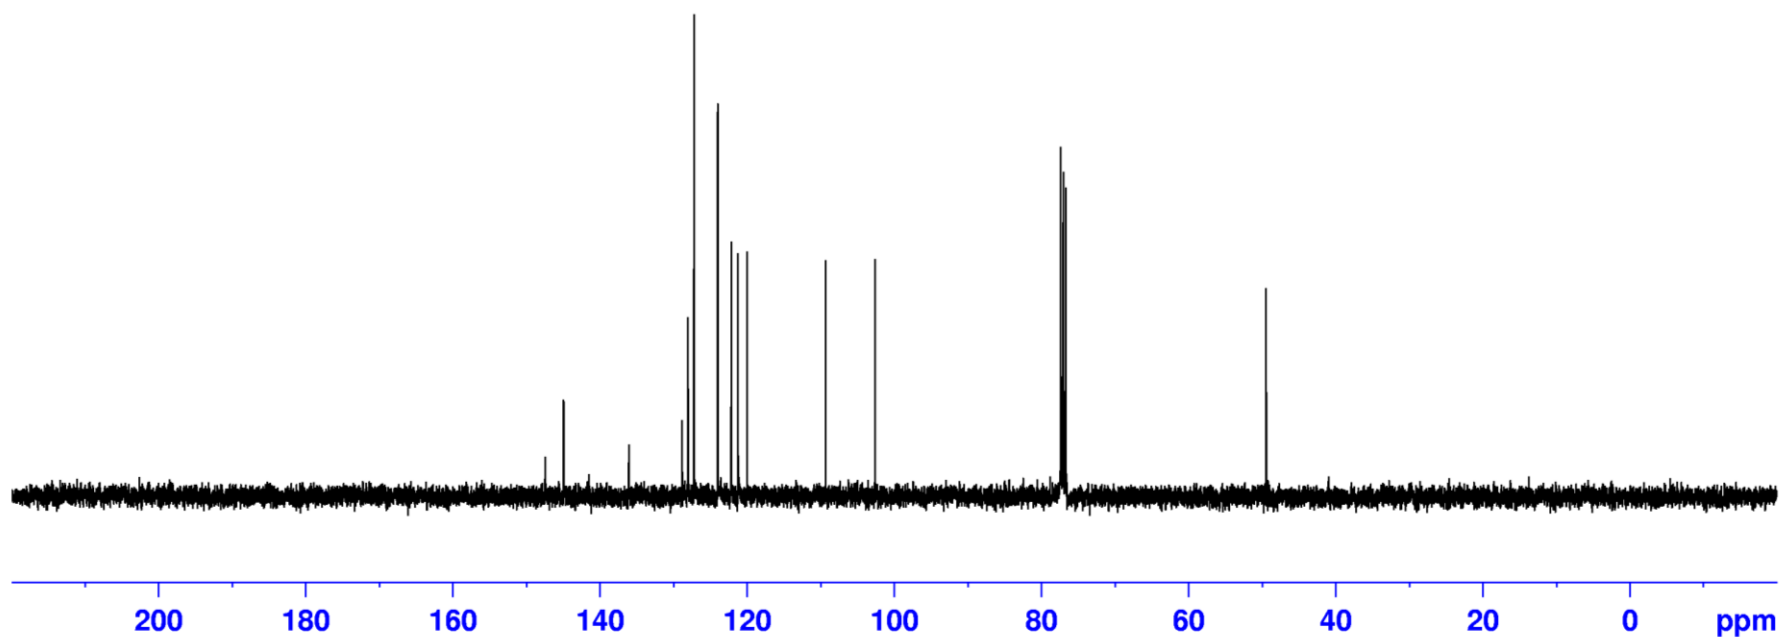

$^1\text{H}$  NMR ( $\text{CDCl}_3$ , 300 MHz) spectrum of 1-(4-methylbenzyl)-1*H*-indole (**4m**)

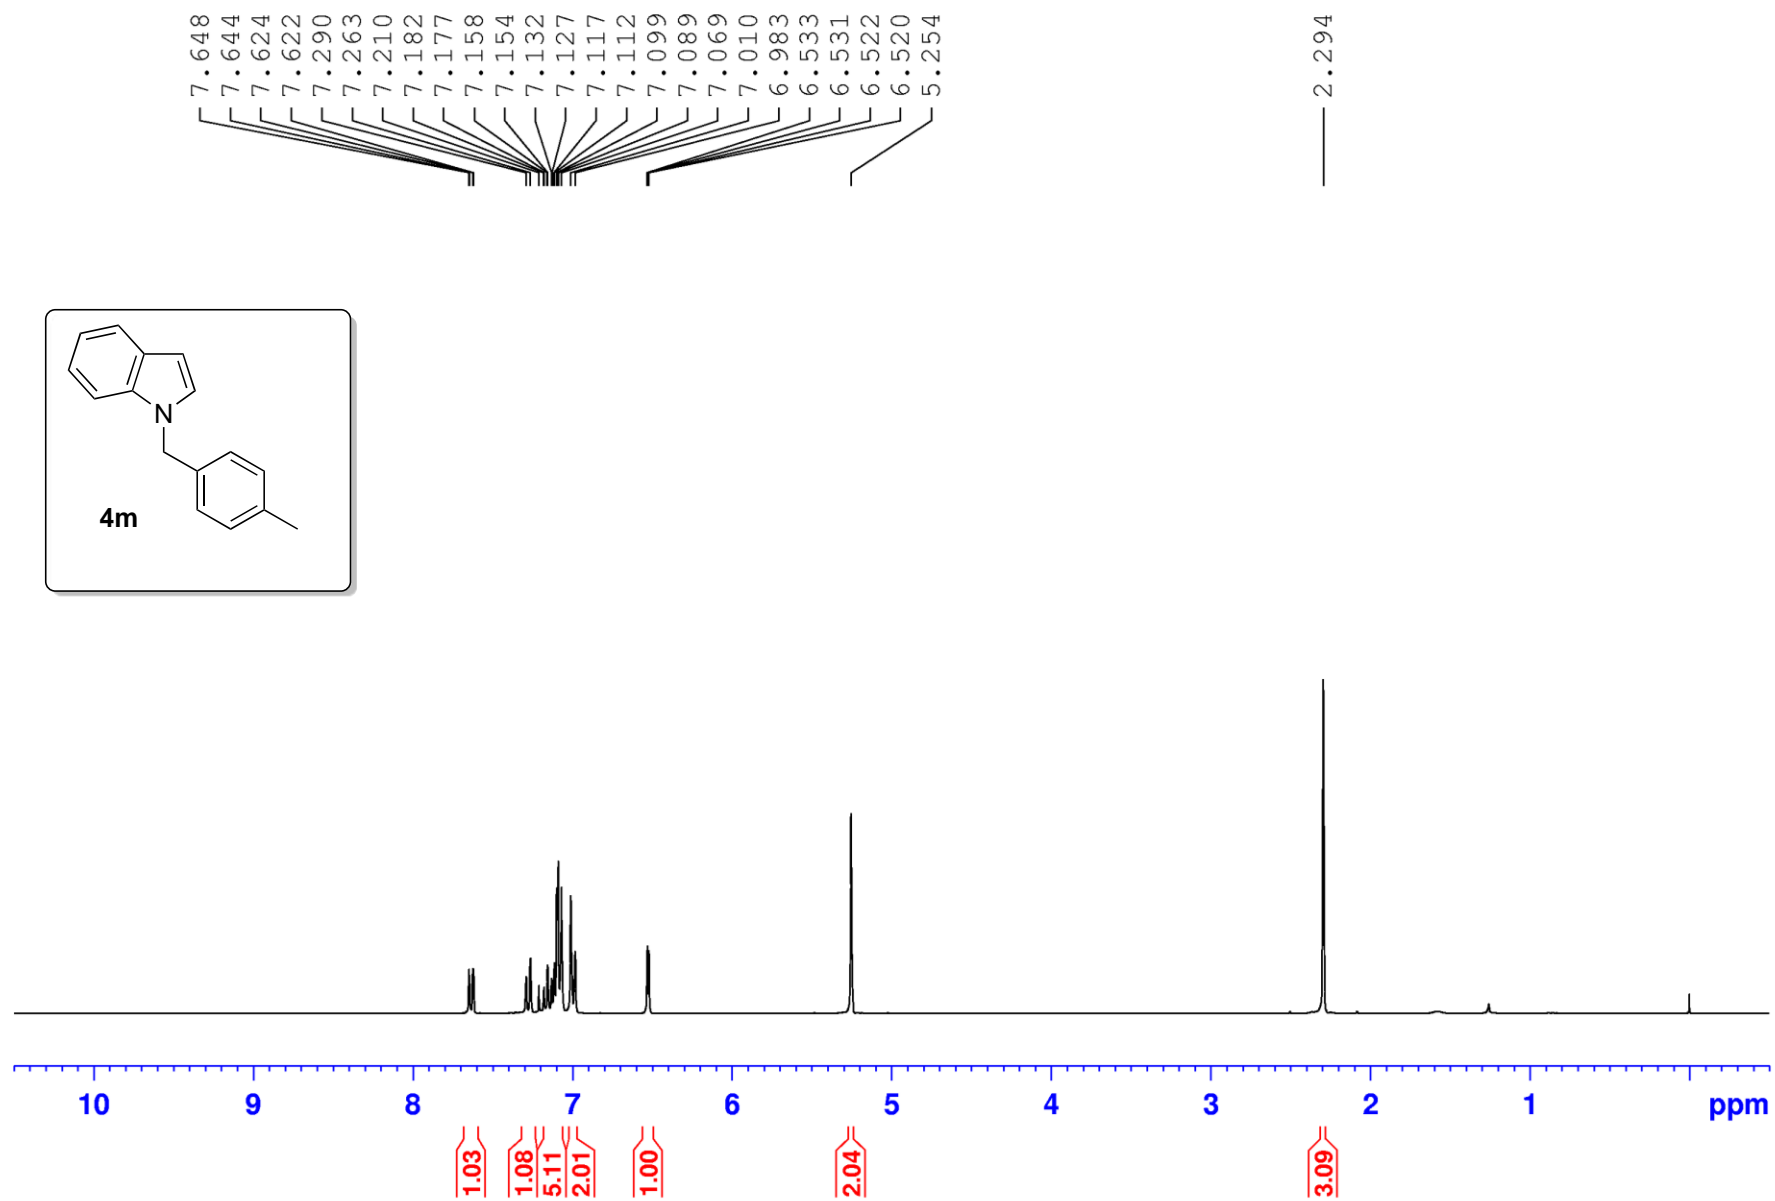

$^{13}\text{C}$  NMR ( $\text{CDCl}_3$ , 75.4 MHz) spectrum of 1-(4-methylbenzyl)-1H-indole (**4m**)

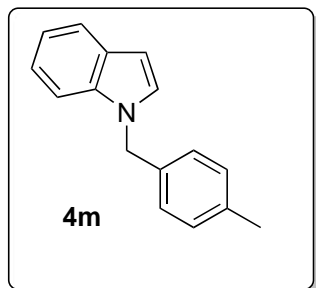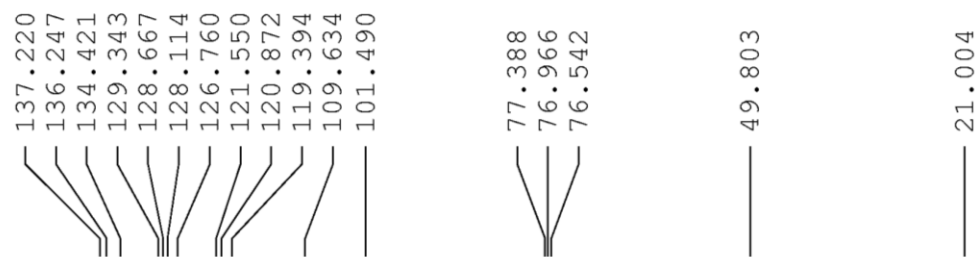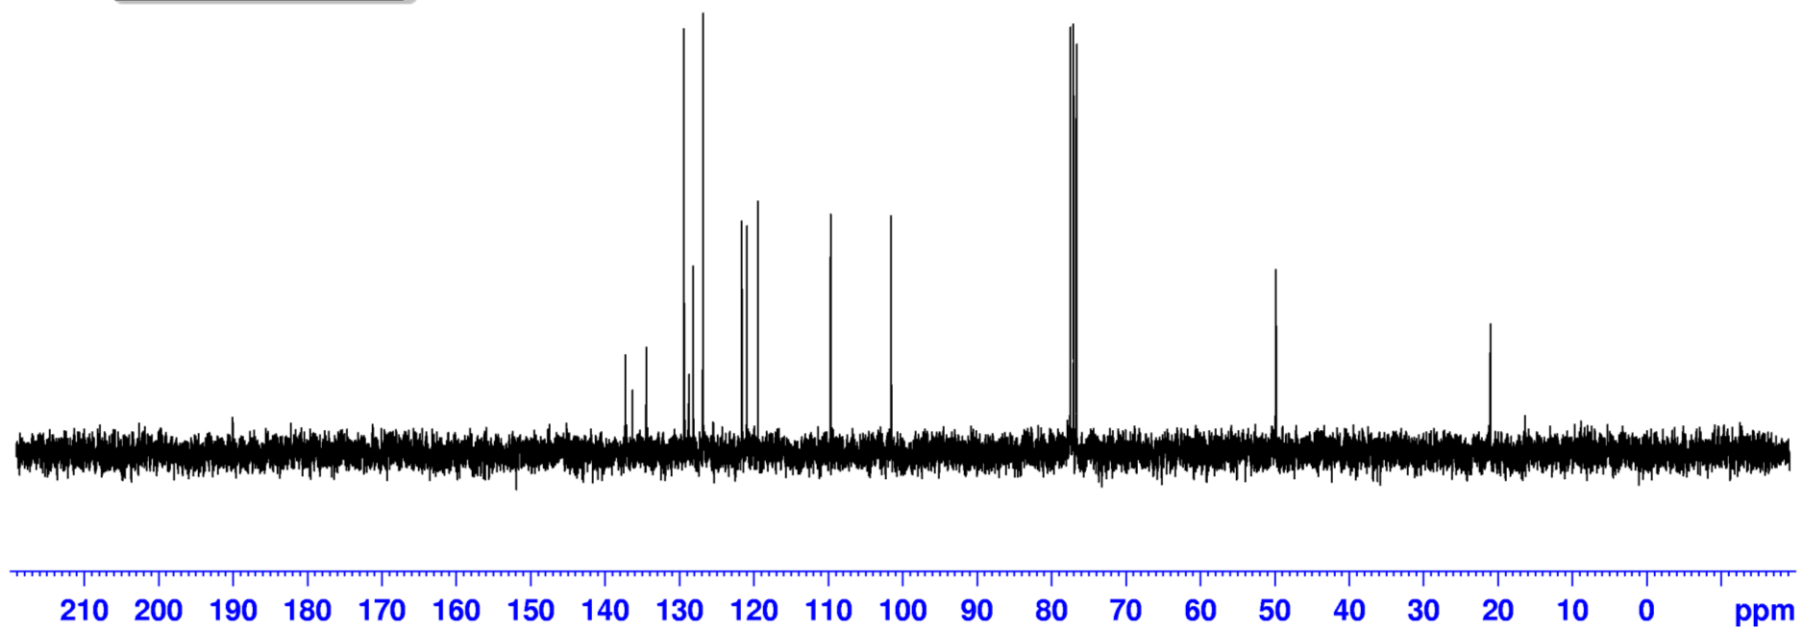

$^1\text{H}$  NMR ( $\text{CDCl}_3$ , 300 MHz) spectrum of 1-(naphthalene-1-ylmethyl)-1*H*-indole (**4n**)

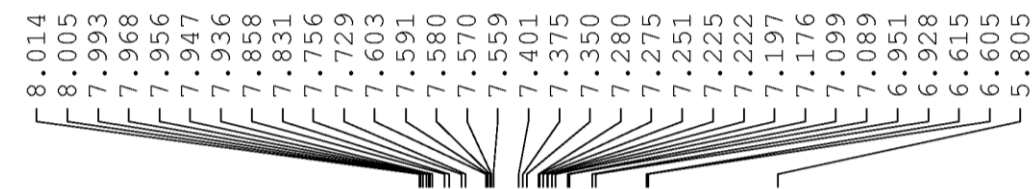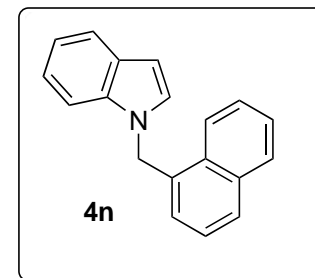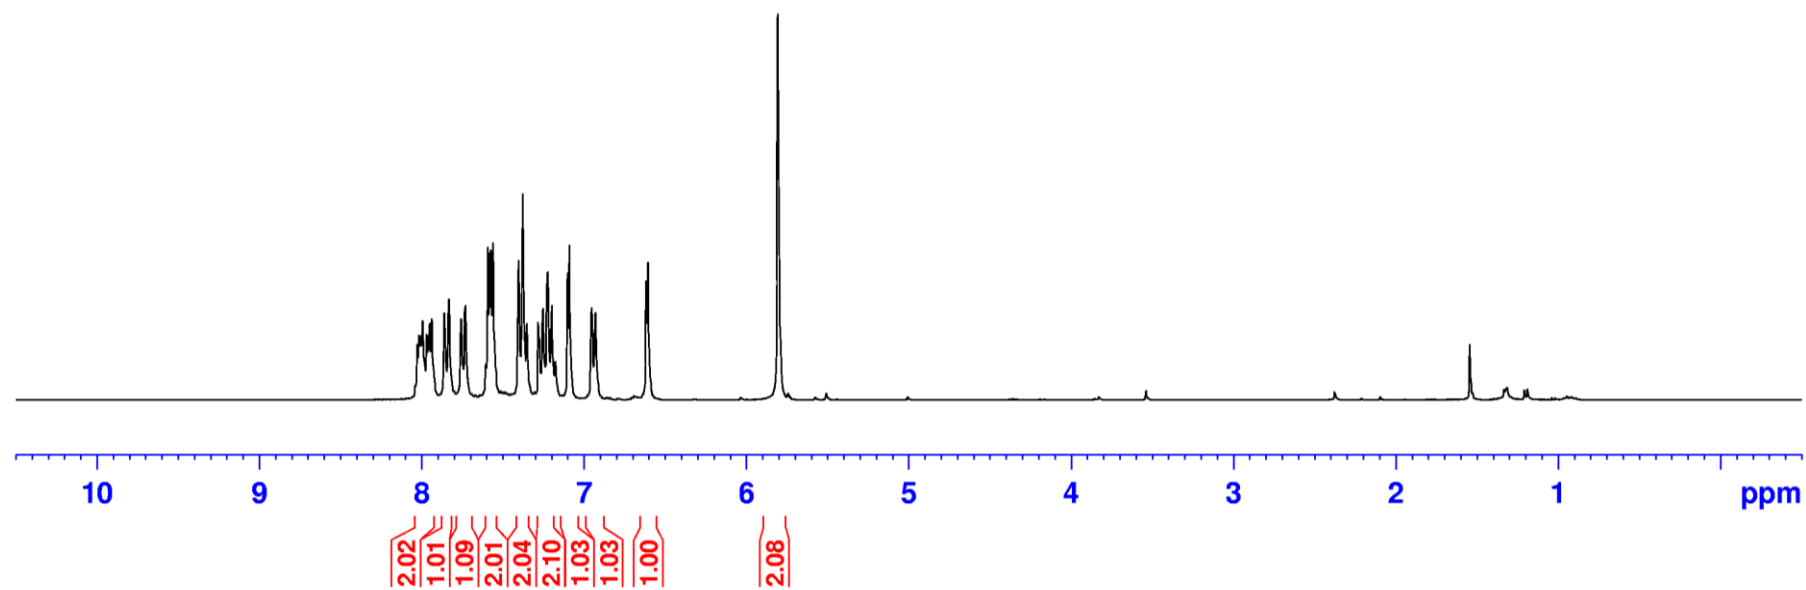



$^{13}\text{C}$  NMR ( $\text{CDCl}_3$ , 90.5 MHz) spectrum of 1-(naphthalene-1-ylmethyl)-1*H*-indole (**4n**)

136.575  
133.747  
132.509  
130.949  
128.979  
128.795  
128.429  
128.214  
126.685  
126.033  
125.607  
125.104  
122.625  
121.821  
121.120  
119.698  
109.648  
101.851  
77.426  
77.075  
76.722  
47.850

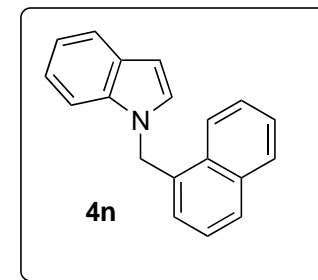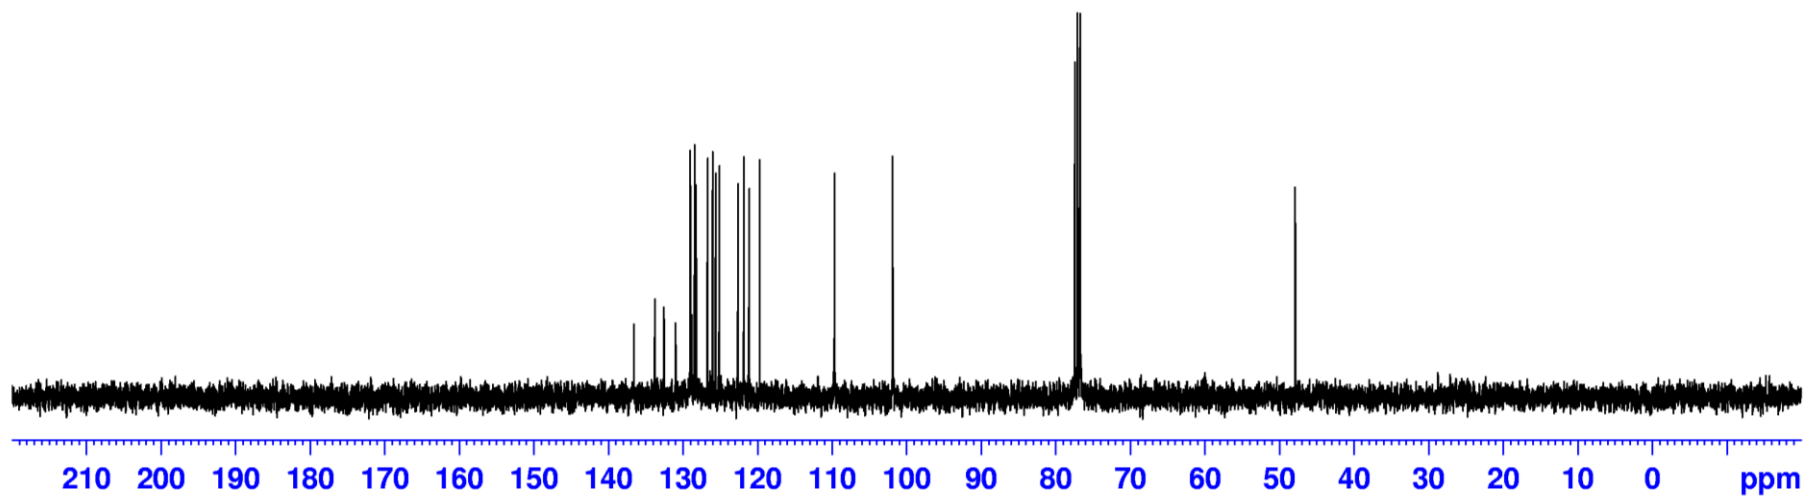

$^1\text{H}$  NMR ( $\text{CDCl}_3$ , 300 MHz) spectrum of 1-(4-methoxy-2,6-dimethylbenzyl)-1*H*-indole (**4o**)

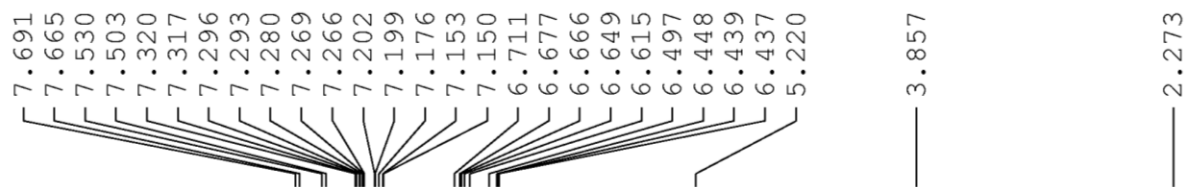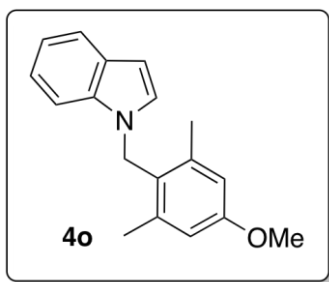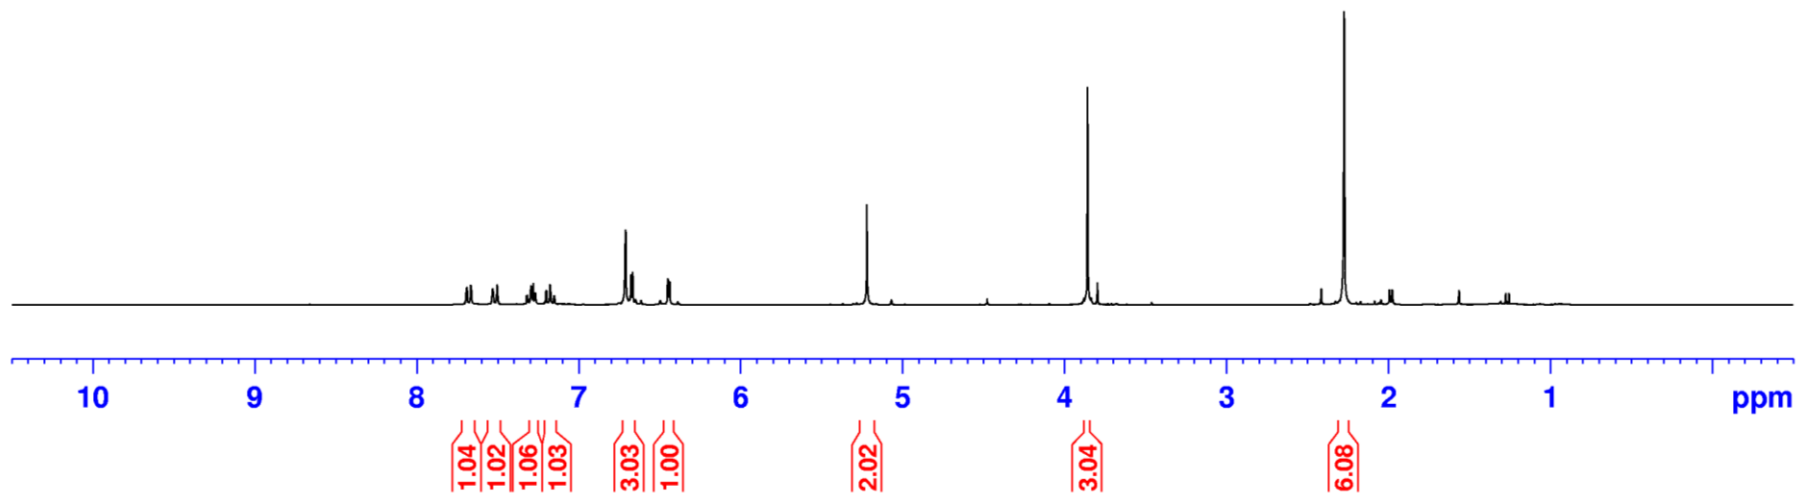

$^{13}\text{C}$  NMR ( $\text{CDCl}_3$ , 75.4 MHz) spectrum of 1-(4-methoxy-2,6-dimethylbenzyl)-1*H*-indole (**4o**)

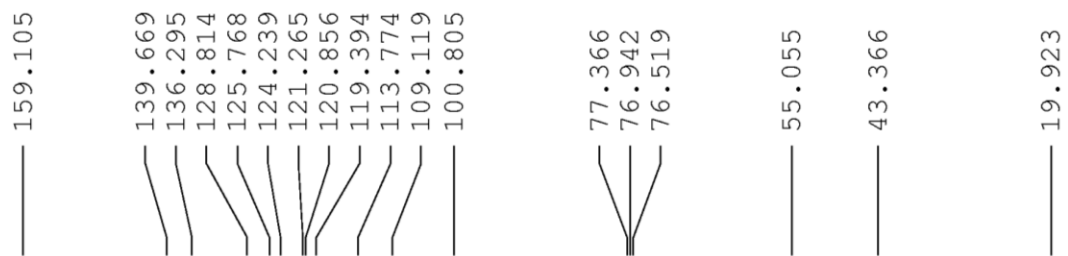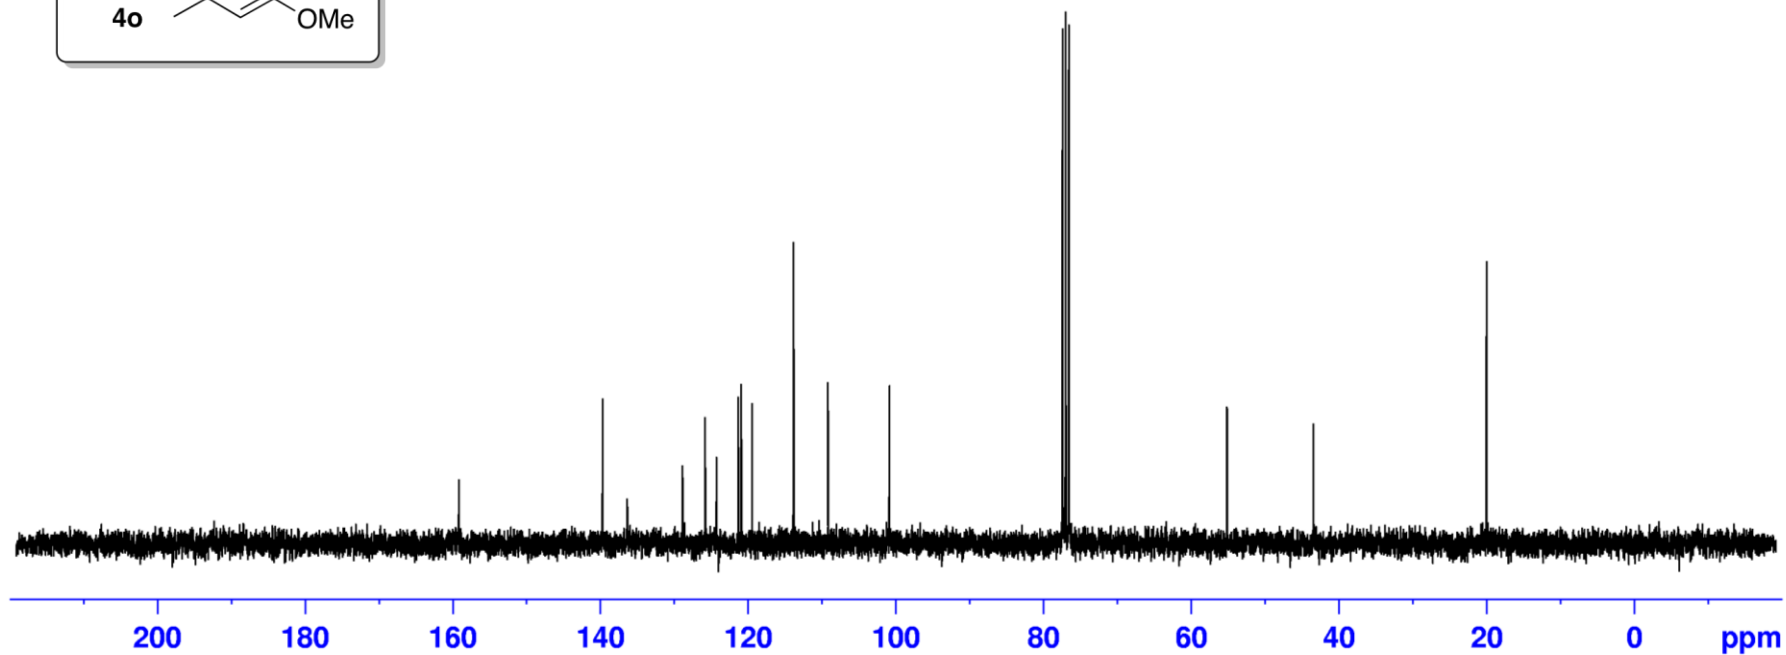

$^1\text{H}$  NMR ( $\text{CDCl}_3$ , 300 MHz) spectrum of 4-((1*H*-indole-1-yl)methyl)-*N,N*-dimethylbenzeneamine (**4p**)

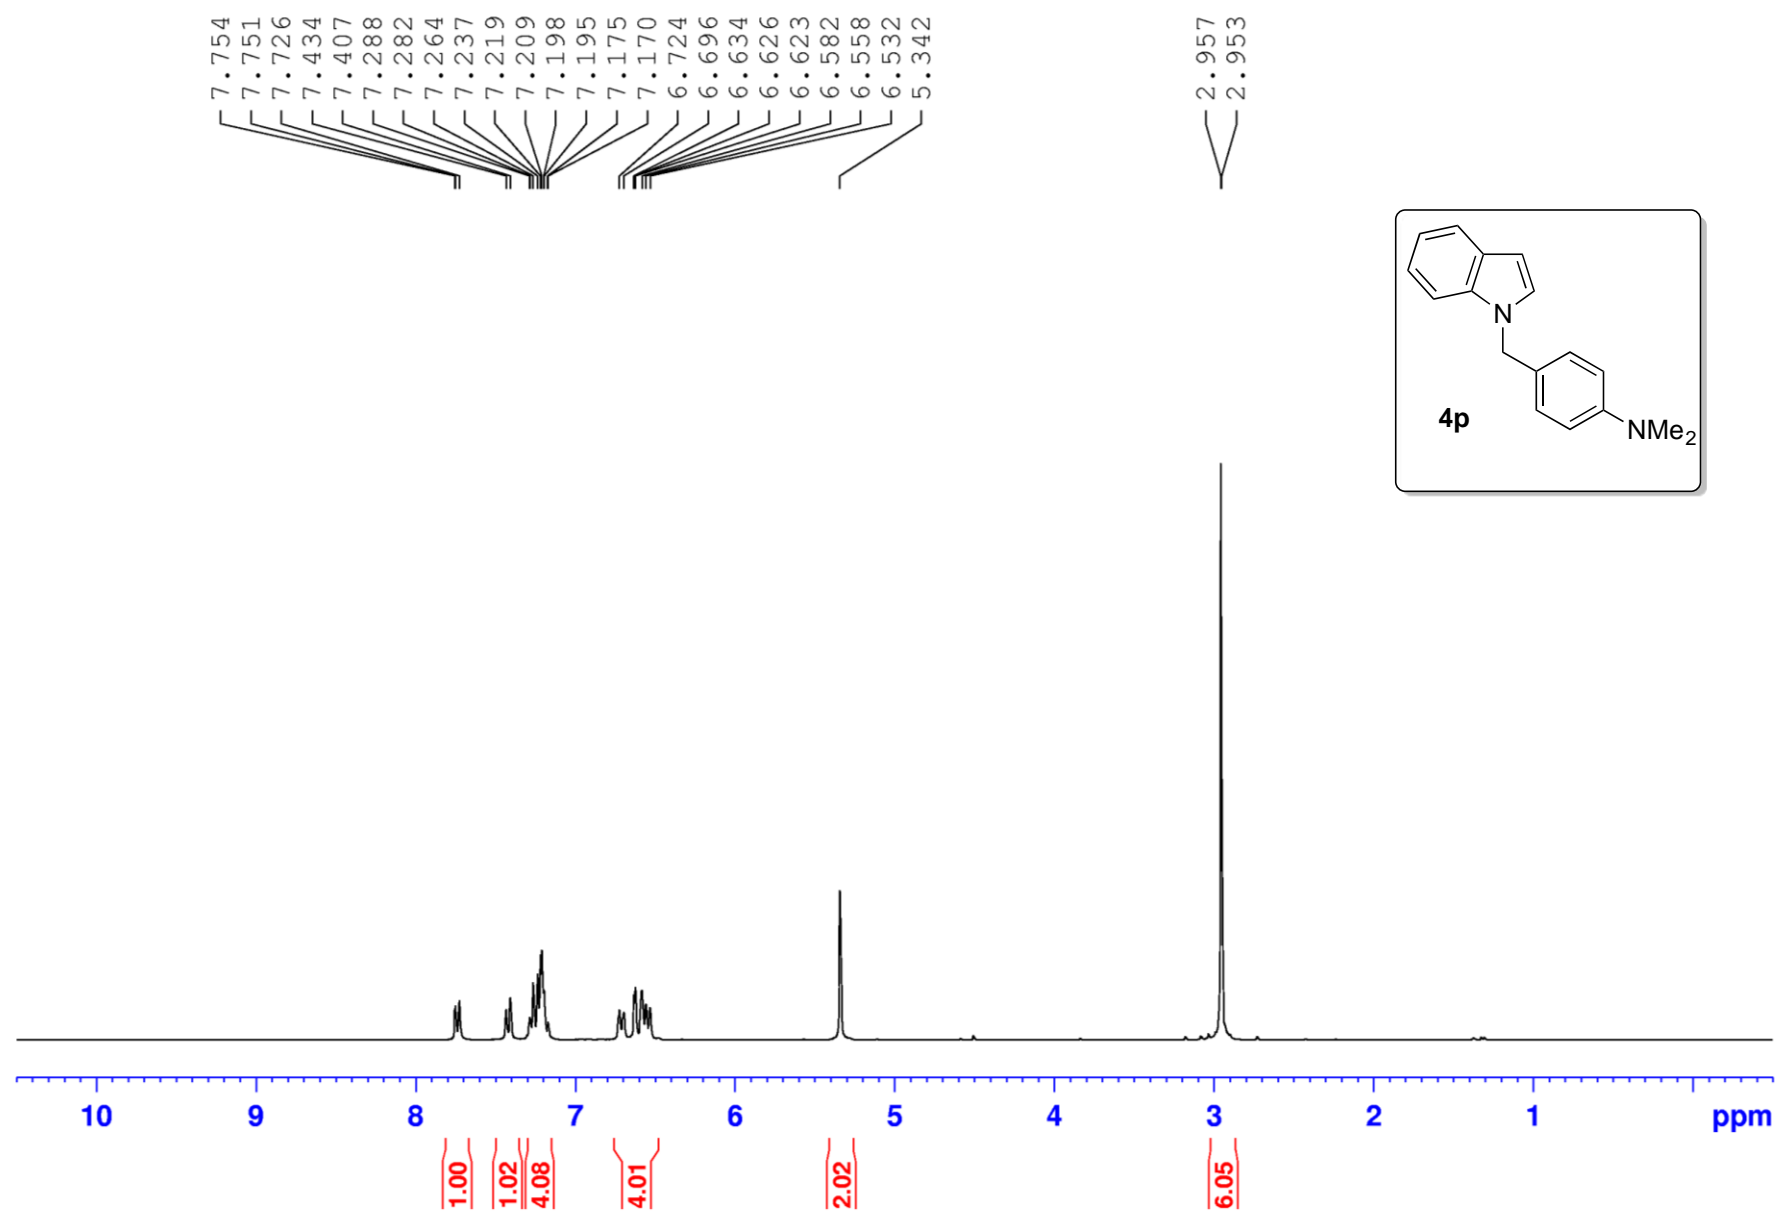

$^{13}\text{C}$  NMR ( $\text{CDCl}_3$ , 75.4 MHz) spectrum of 4-((1*H*-indole-1-yl)methyl)-*N,N*-dimethylbenzeneamine (**4p**)

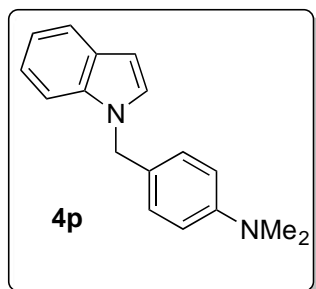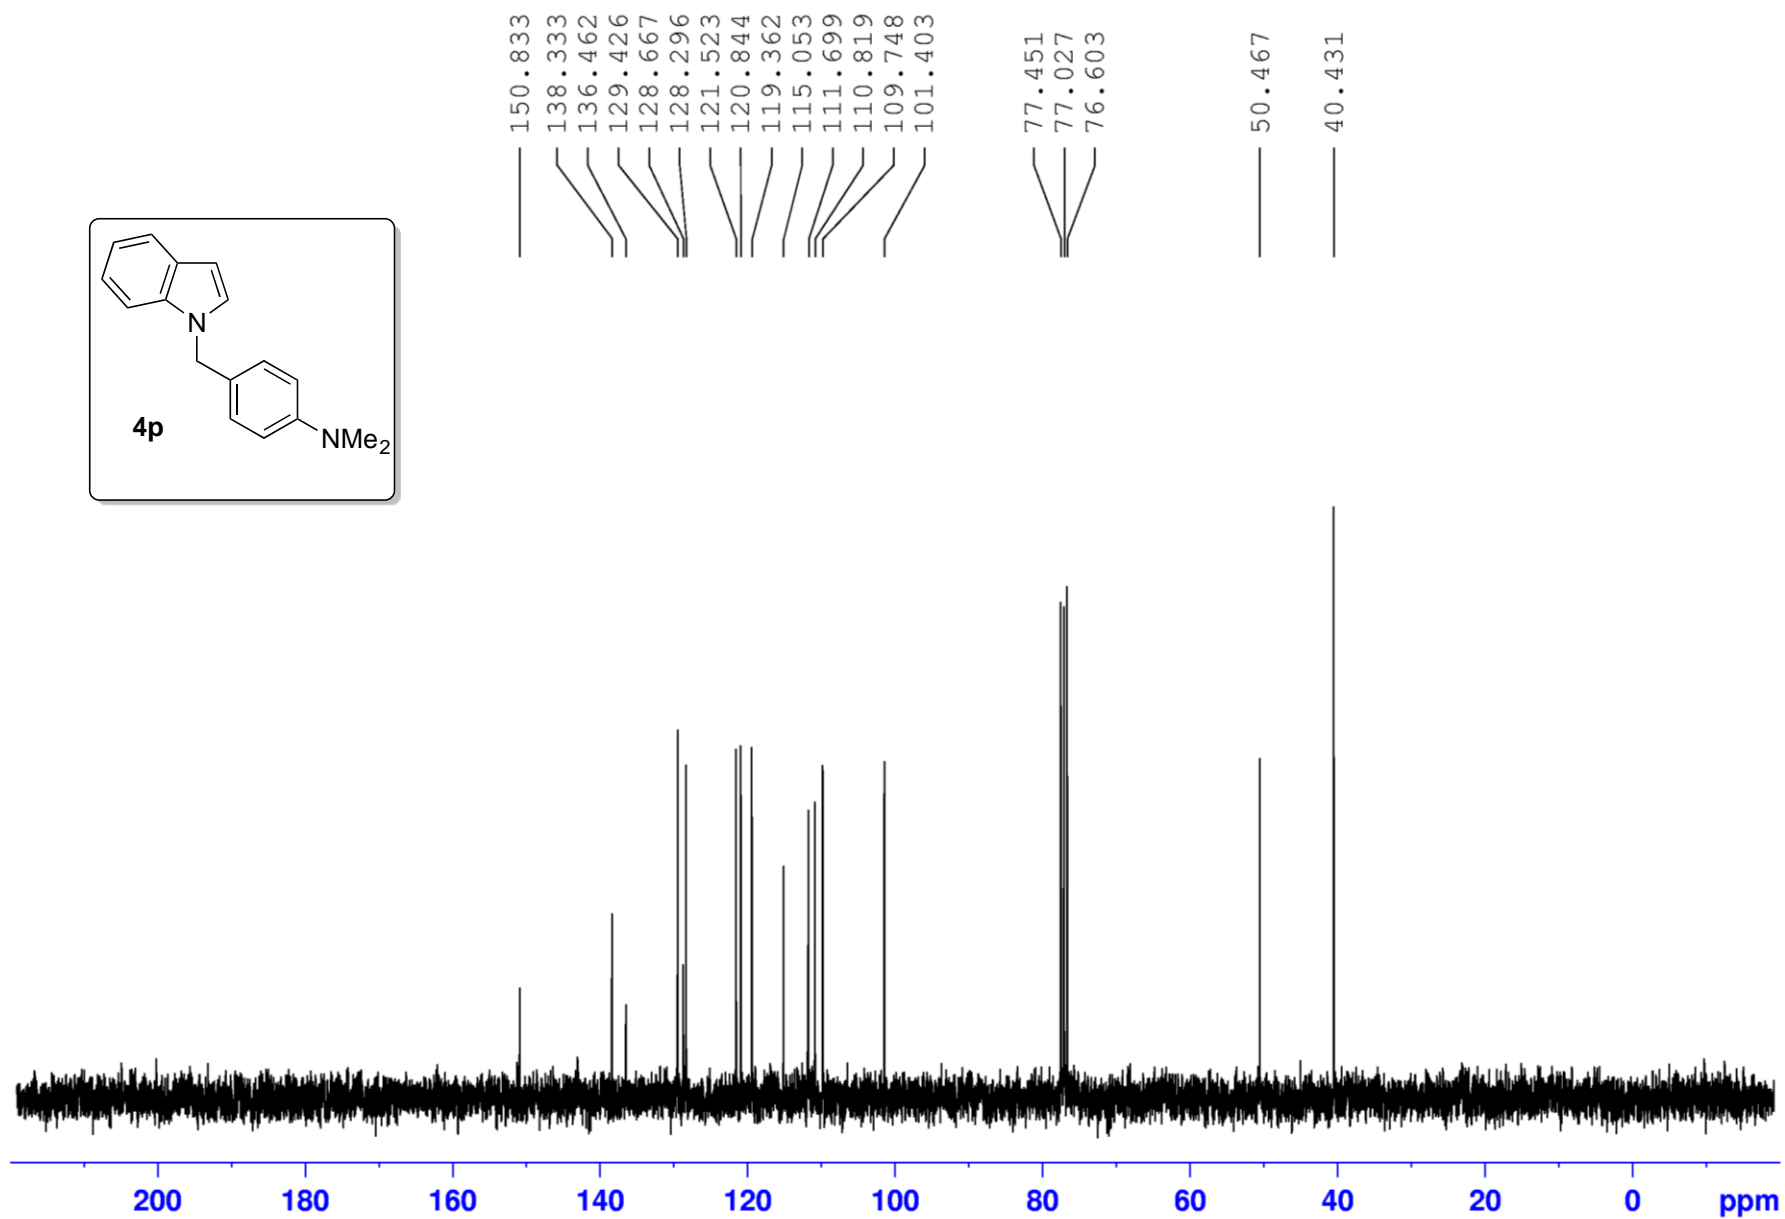

$^1\text{H}$  NMR ( $\text{CDCl}_3$ , 300 MHz) spectrum of 5-((1*H*-indol-1-yl)methyl)thiophene-2-carbaldehyde (**5a**)

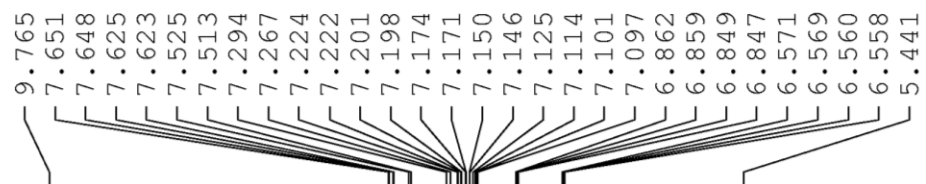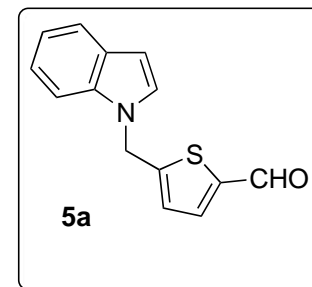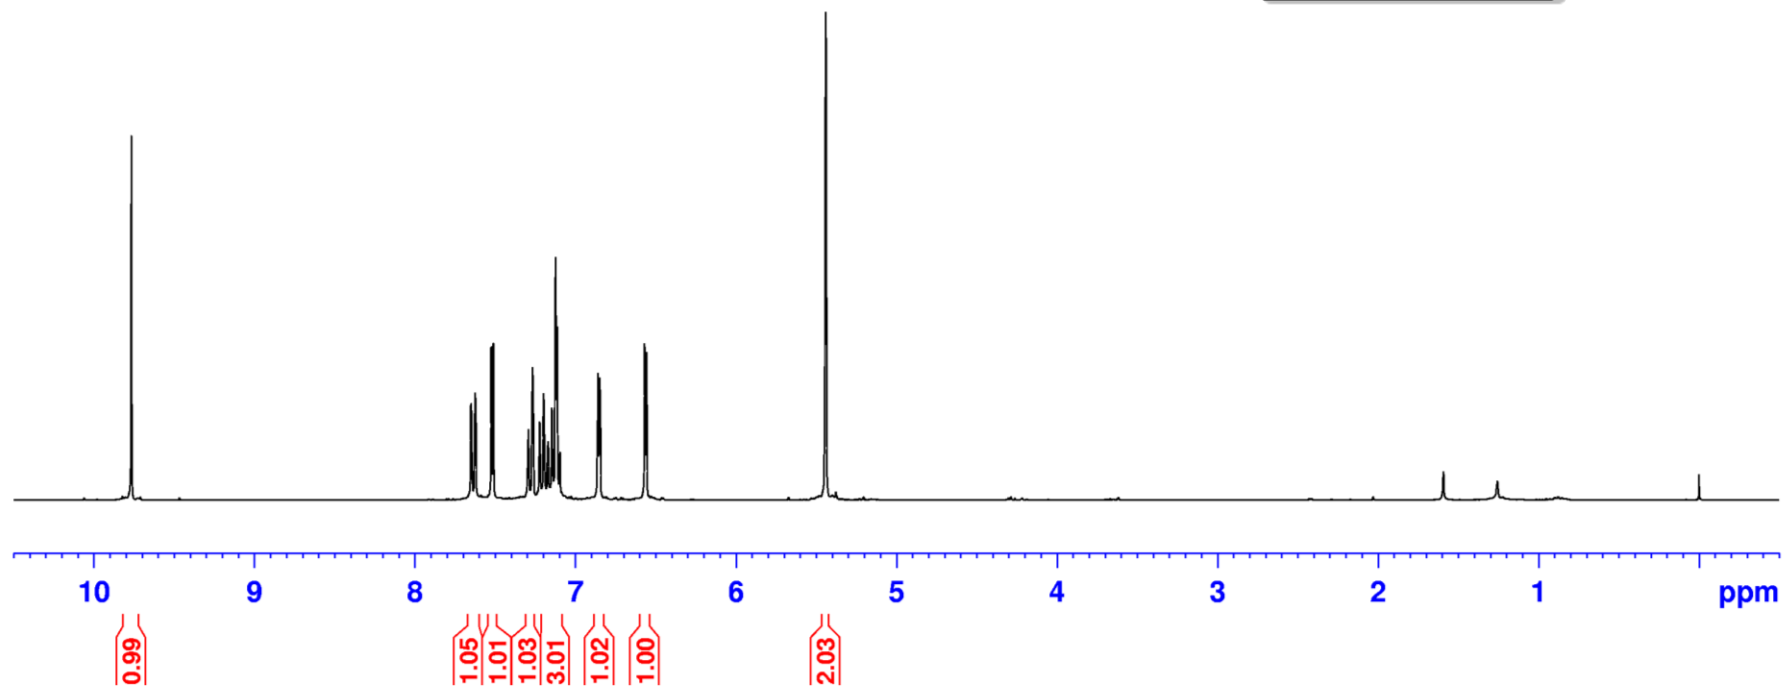

$^{13}\text{C}$  NMR ( $\text{CDCl}_3$ , 75.4 MHz) spectrum of 5-((1*H*-indol-1-yl)methyl)thiophene-2-carbaldehyde (**5a**)

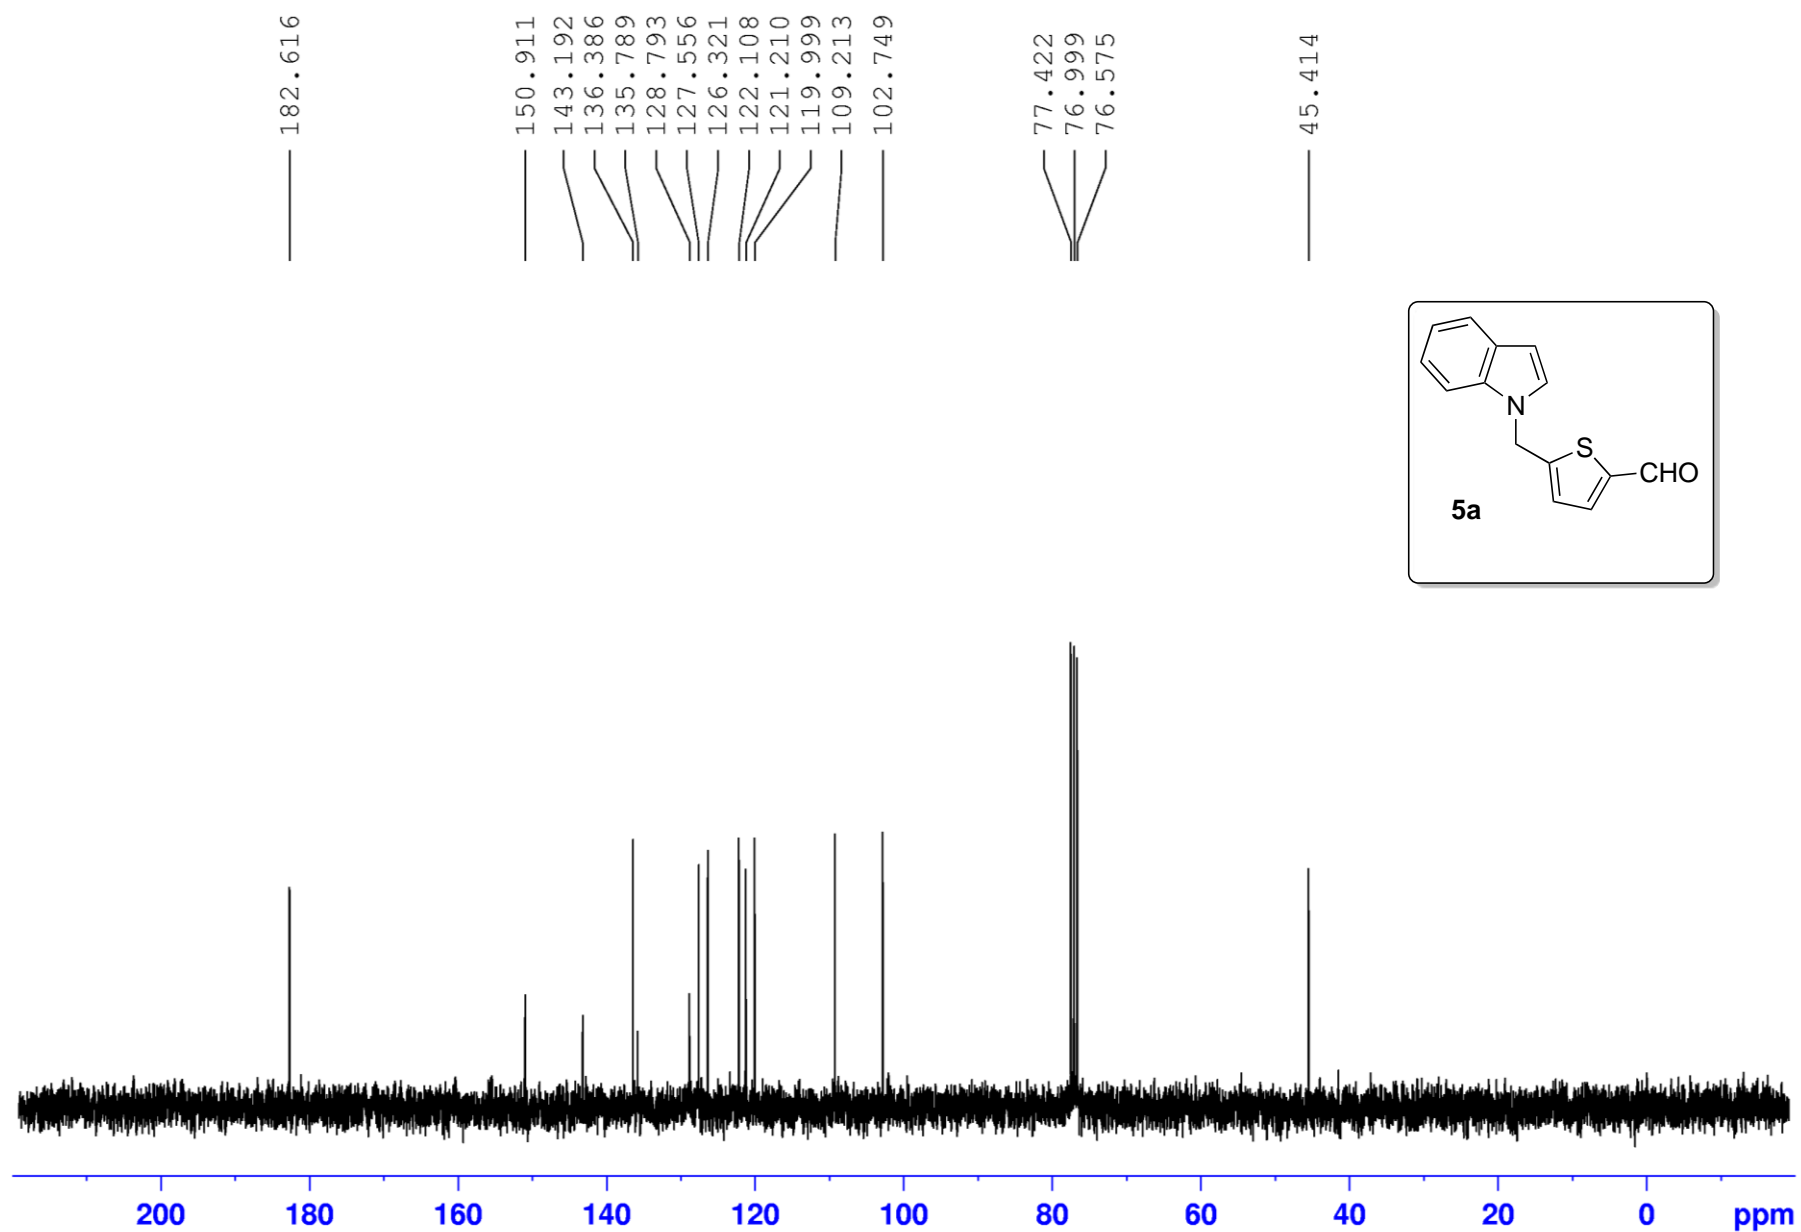

$^1\text{H}$  NMR ( $\text{CDCl}_3$ , 300 MHz) spectrum of 5-((1*H*-indol-1-yl)methyl)furan-2-carbaldehyde (**5b**)

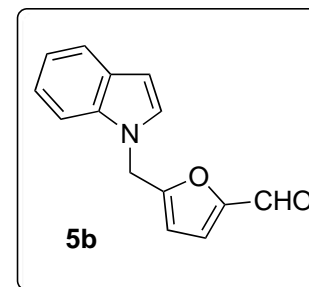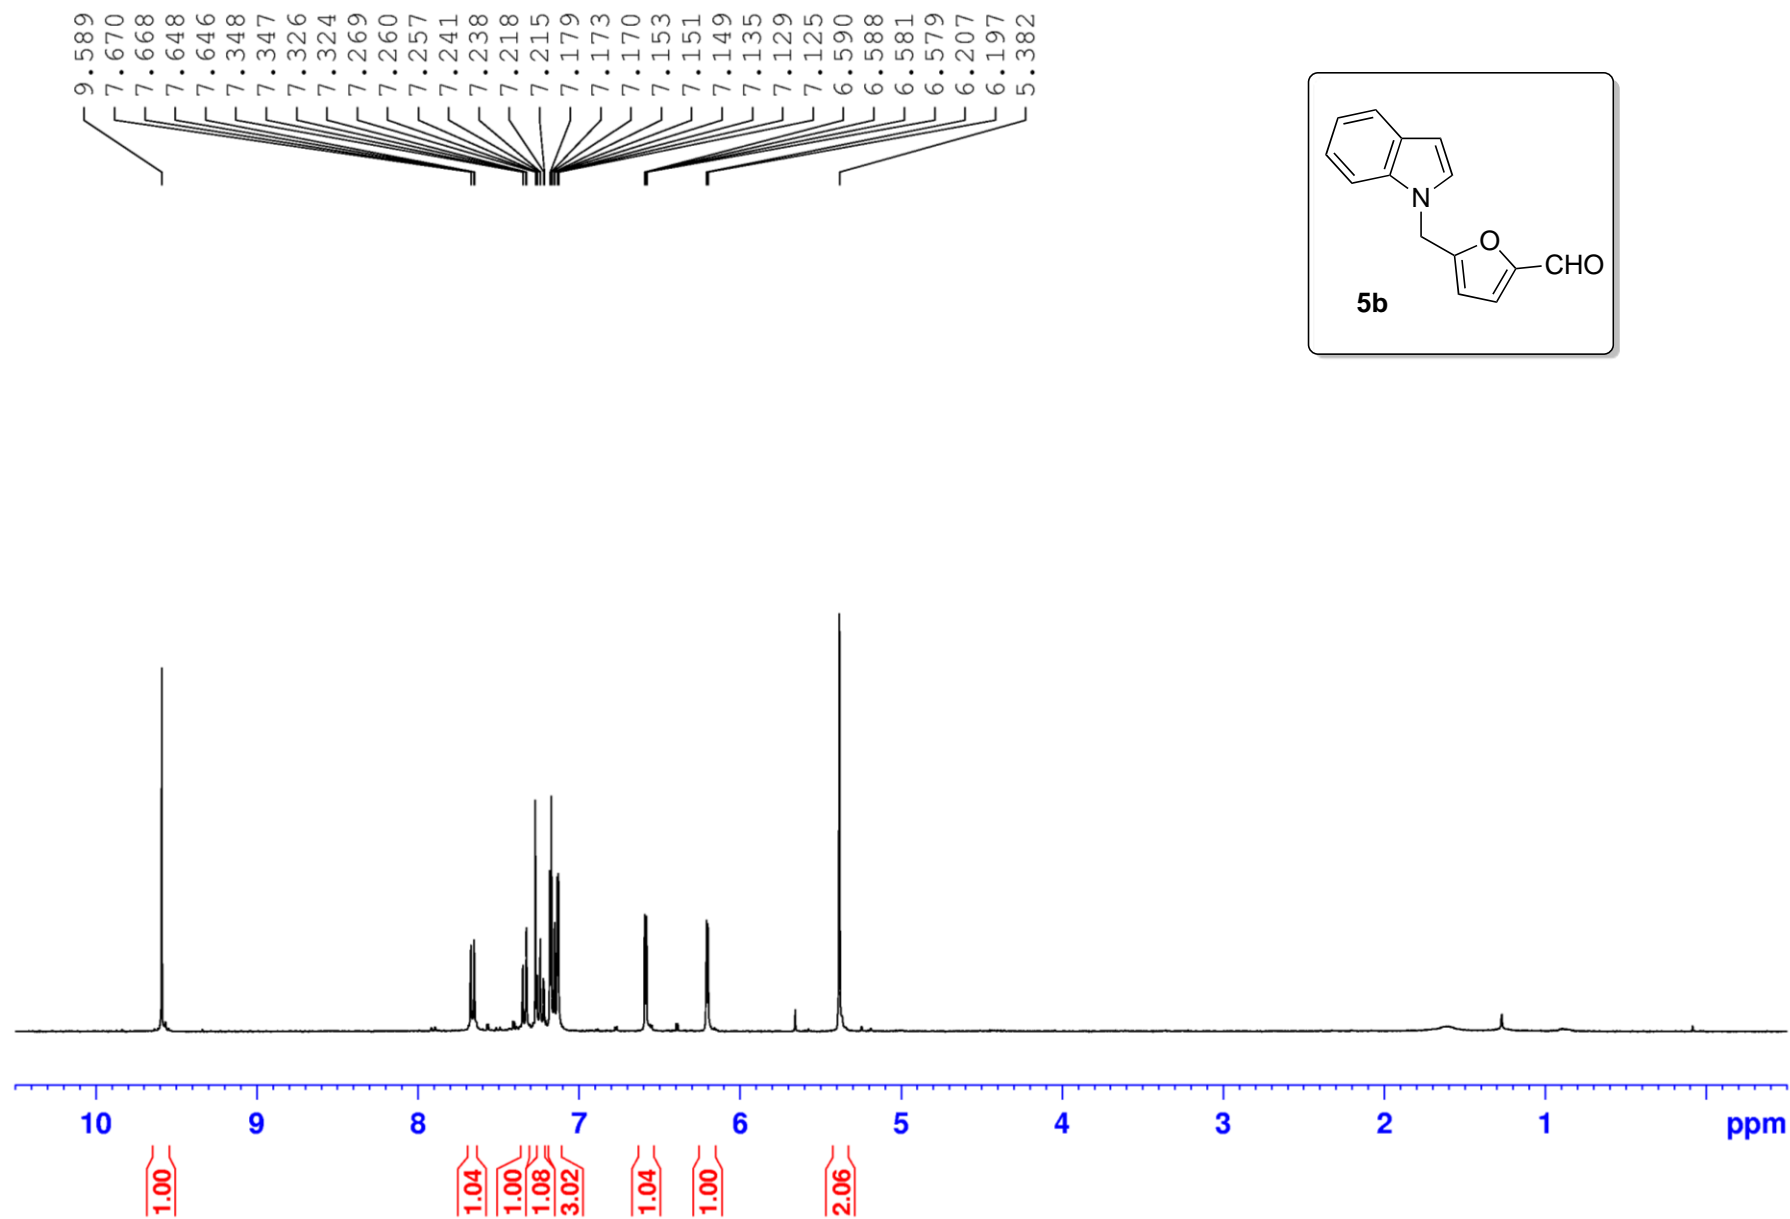



$^{13}\text{C}$  NMR ( $\text{CDCl}_3$ , 75.4 MHz) spectrum of 5-((1*H*-indol-1-yl)methyl)furan-2-carbaldehyde (**5b**)

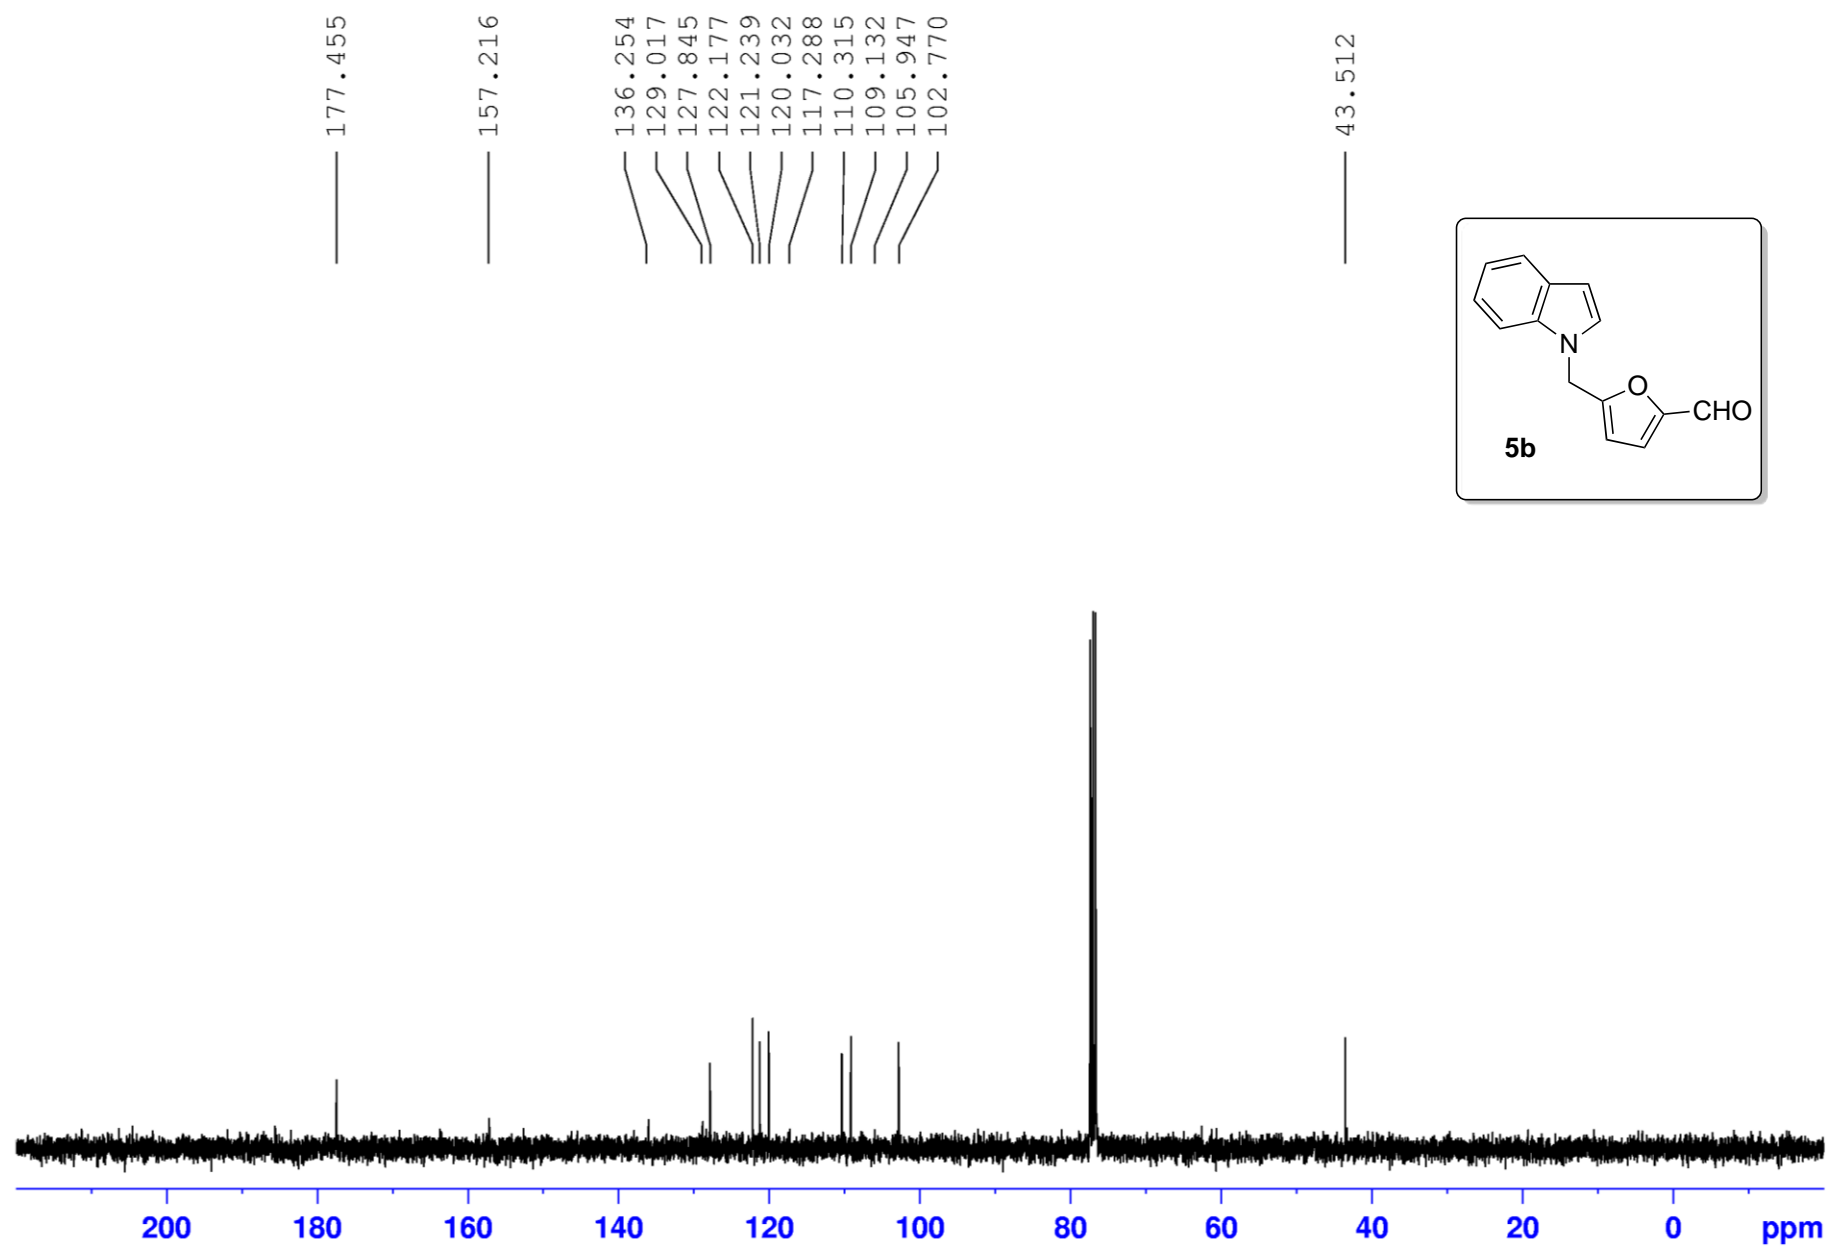

$^1\text{H}$  NMR ( $\text{CDCl}_3$ , 300 MHz) spectrum of 1-(pyridin-3-ylmethyl)-1H-indole (**5c**)

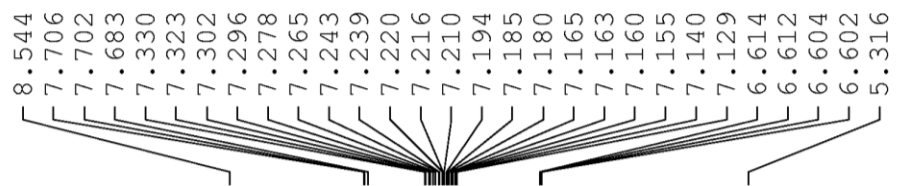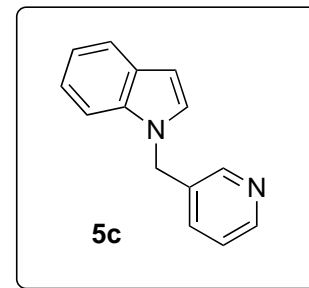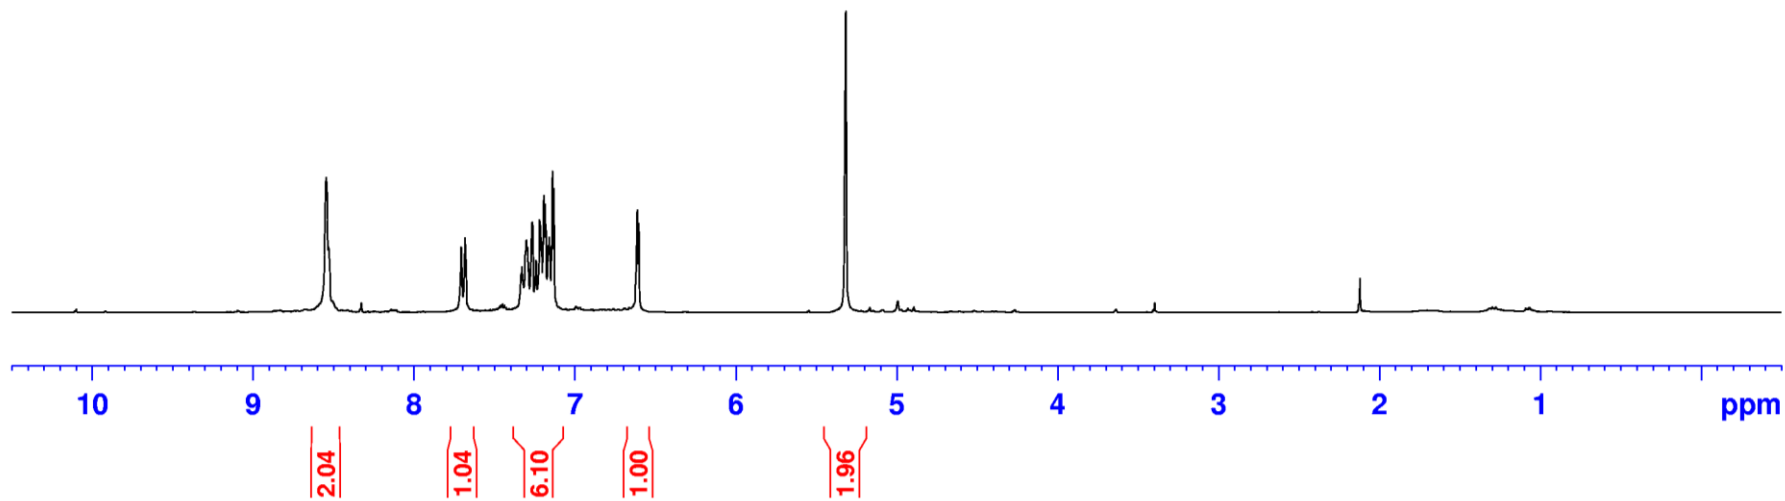

$^{13}\text{C}$  NMR ( $\text{CDCl}_3$ , 75.4 MHz) spectrum of 1-(pyridin-3-ylmethyl)-1*H*-indole (**5c**)

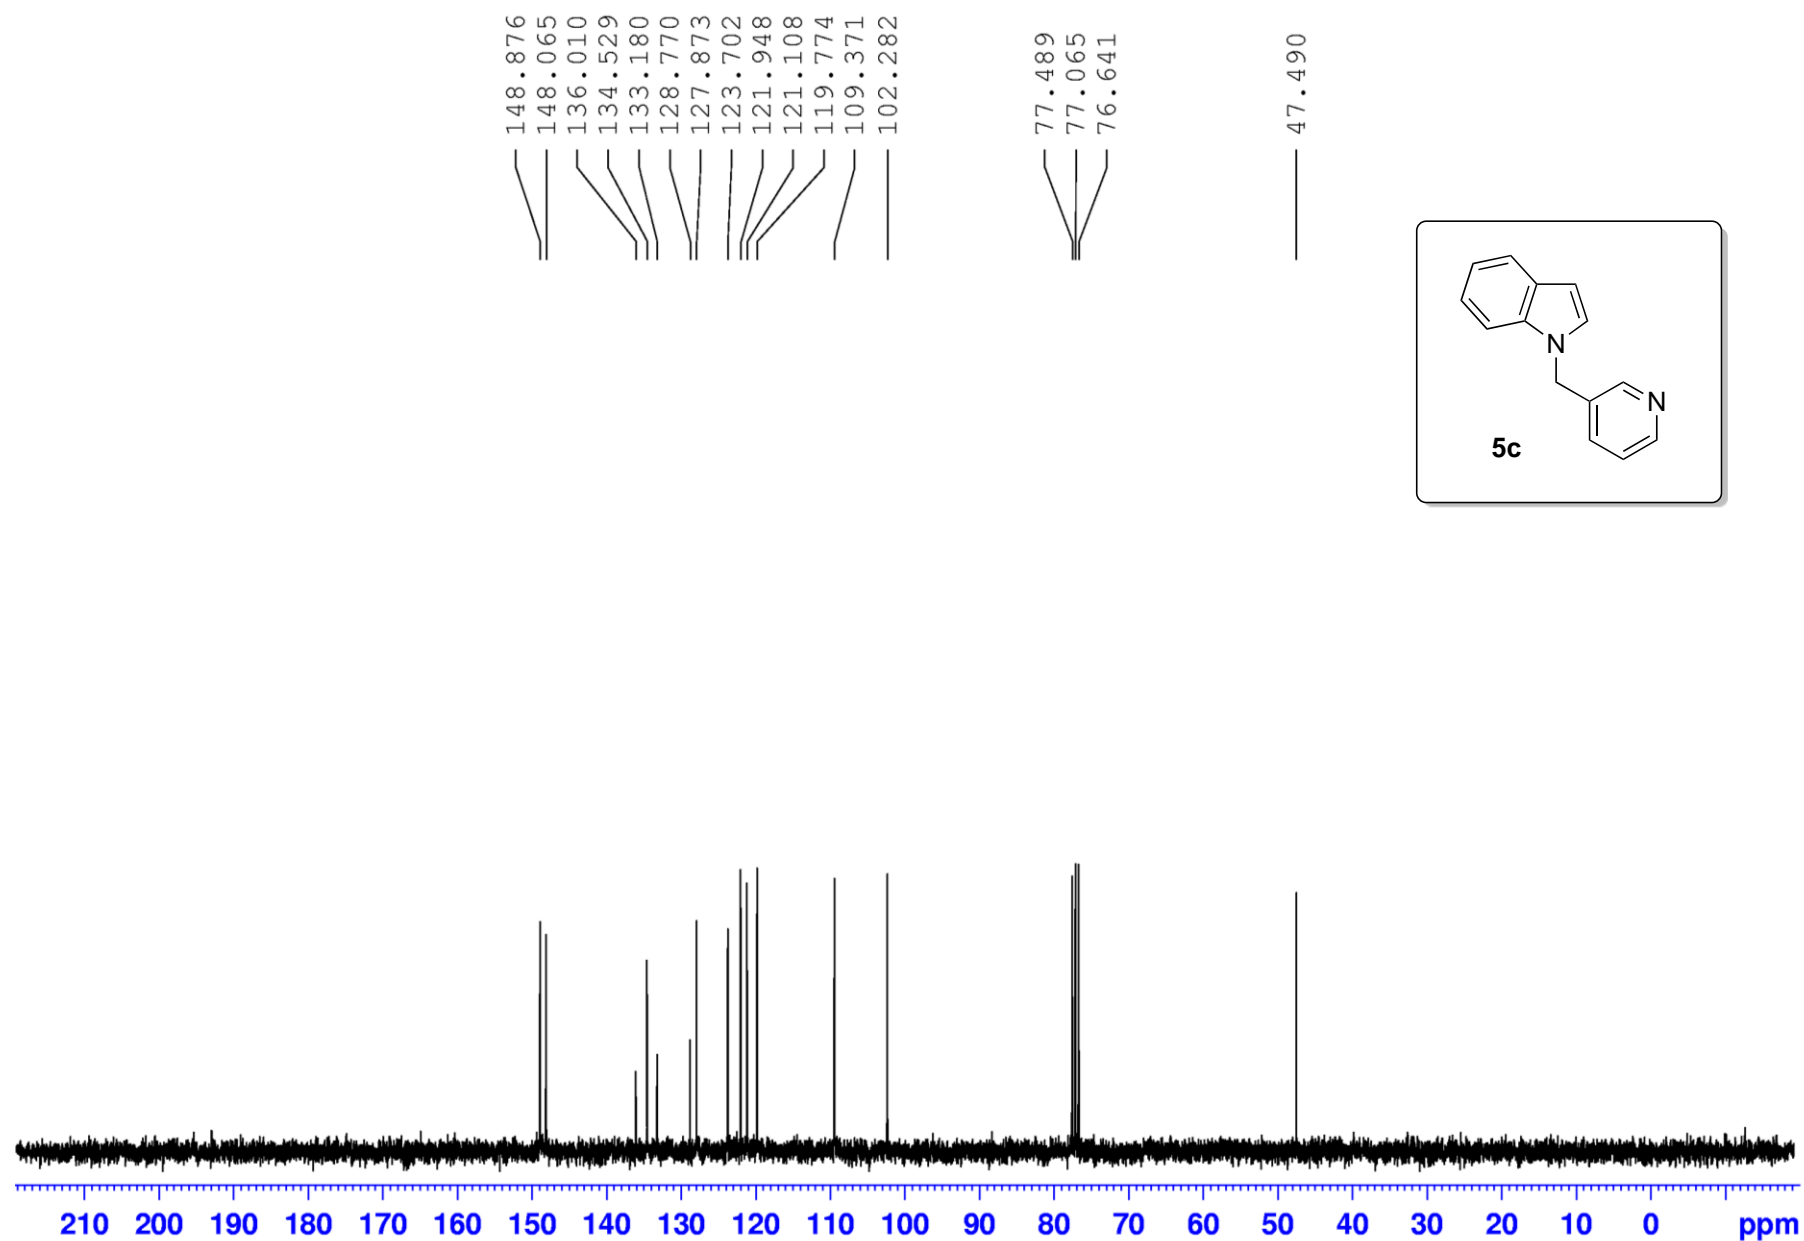

$^1\text{H}$  NMR ( $\text{CDCl}_3$ , 300 MHz) spectrum of 1-5-((trifluoromethyl)pyridin-3-yl)methyl)-1*H*-indole (**5d**)

8.860  
8.633  
7.754  
7.751  
7.746  
7.729  
7.726  
7.722  
7.650  
7.278  
7.274  
7.263  
7.251  
7.237  
7.226  
7.223  
7.211  
7.197  
7.157  
7.146  
6.677  
6.666  
5.375

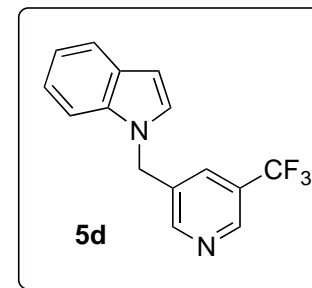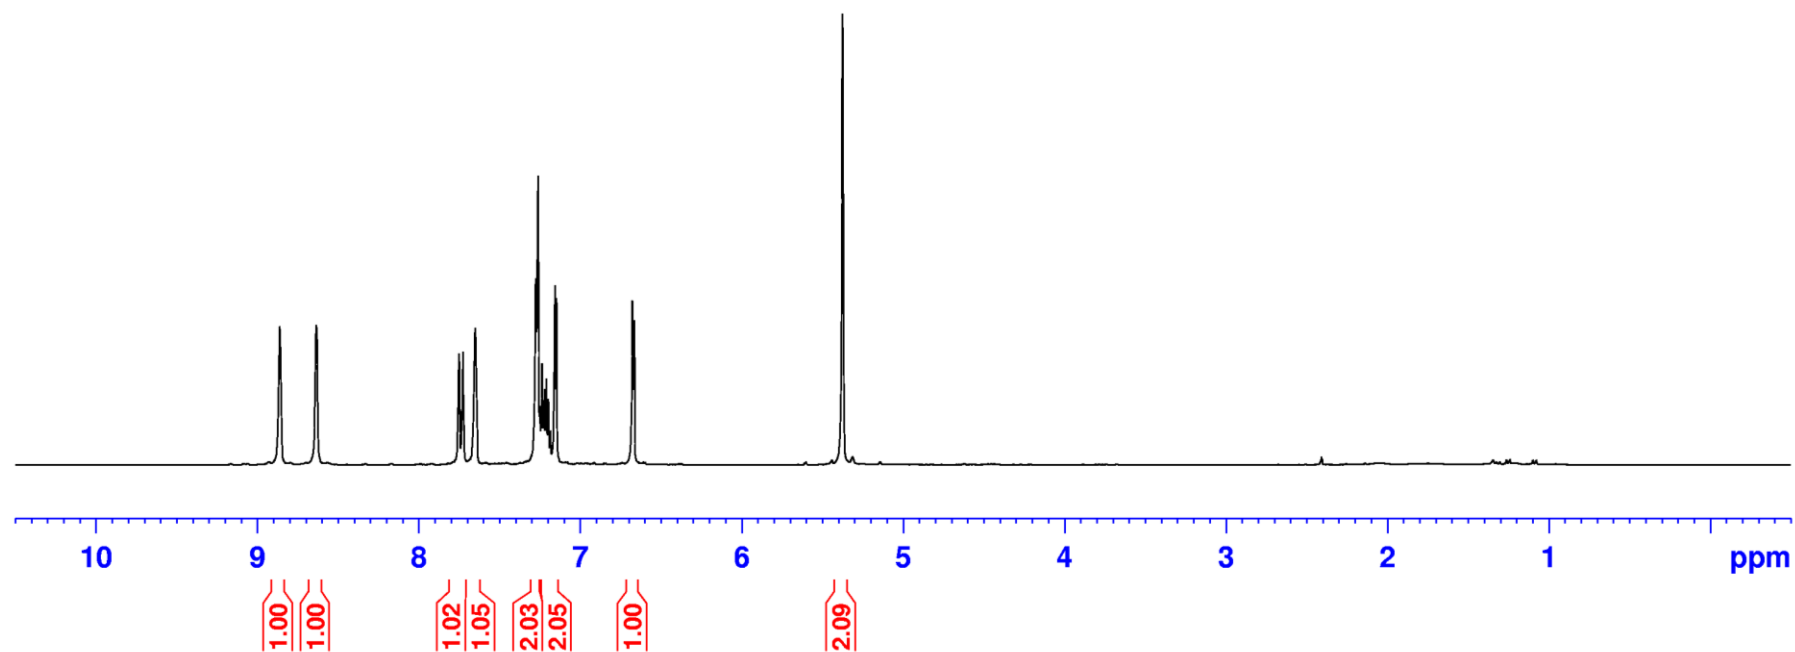

$^{13}\text{C}$  NMR ( $\text{CDCl}_3$ , 75.4 MHz) spectrum of 1-5-((trifluoromethyl)pyridin-3-yl)methyl)-1*H*-indole (**5d**)

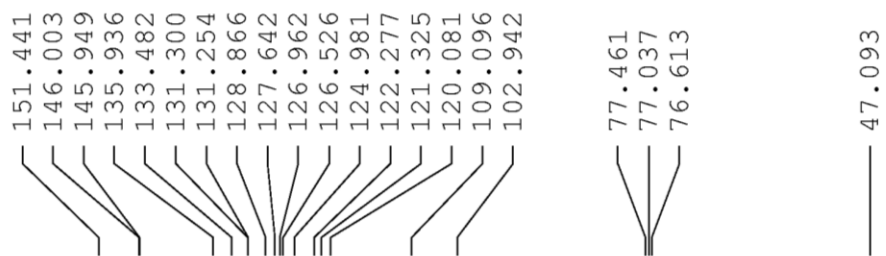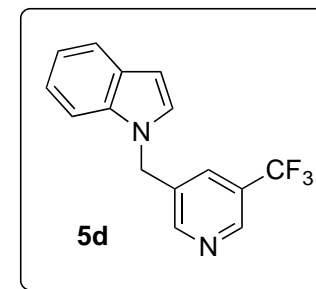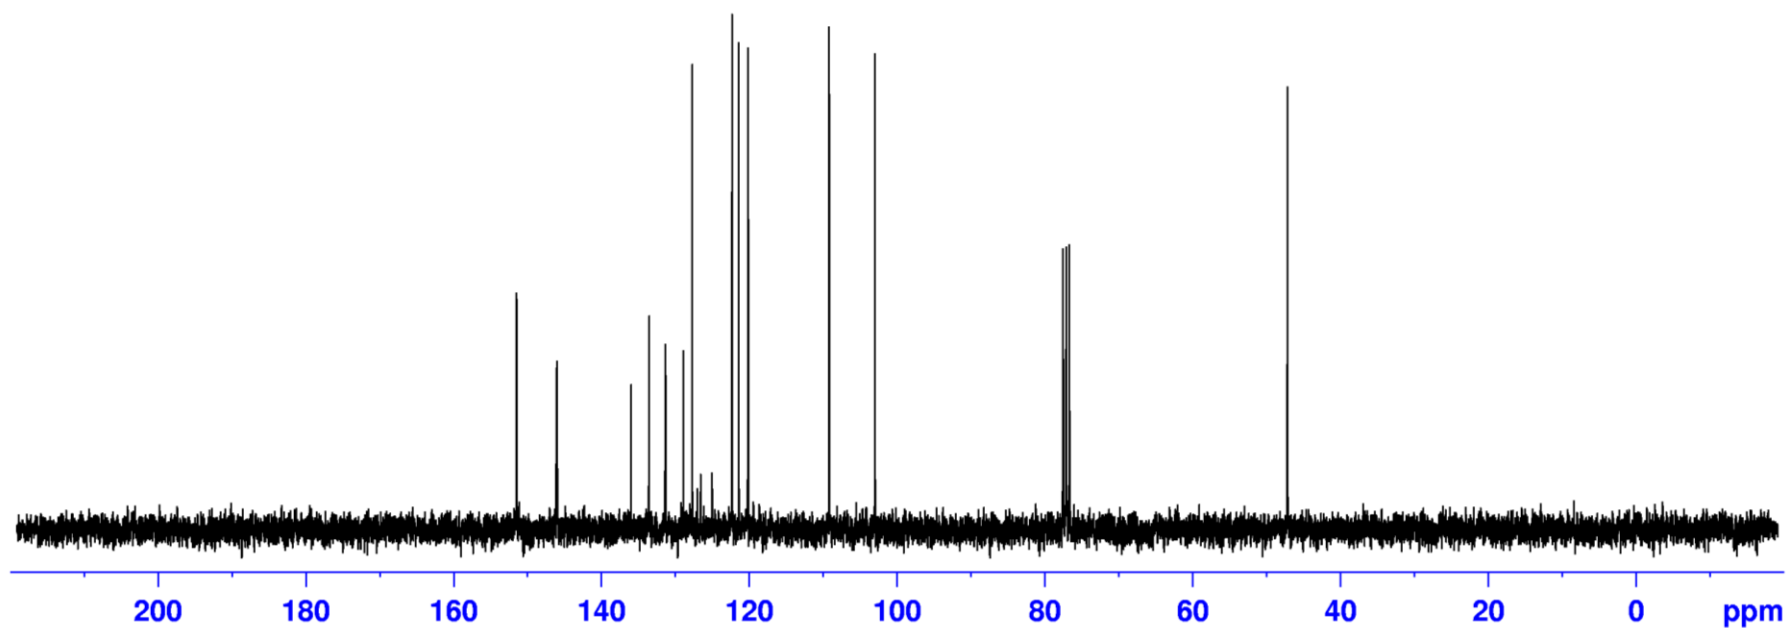

$^{19}\text{F}$  NMR ( $\text{CDCl}_3$ , 282.4 MHz) spectrum of 1-5-((trifluoromethyl)pyridin-3-yl)methyl)-1*H*-indole (**5d**)

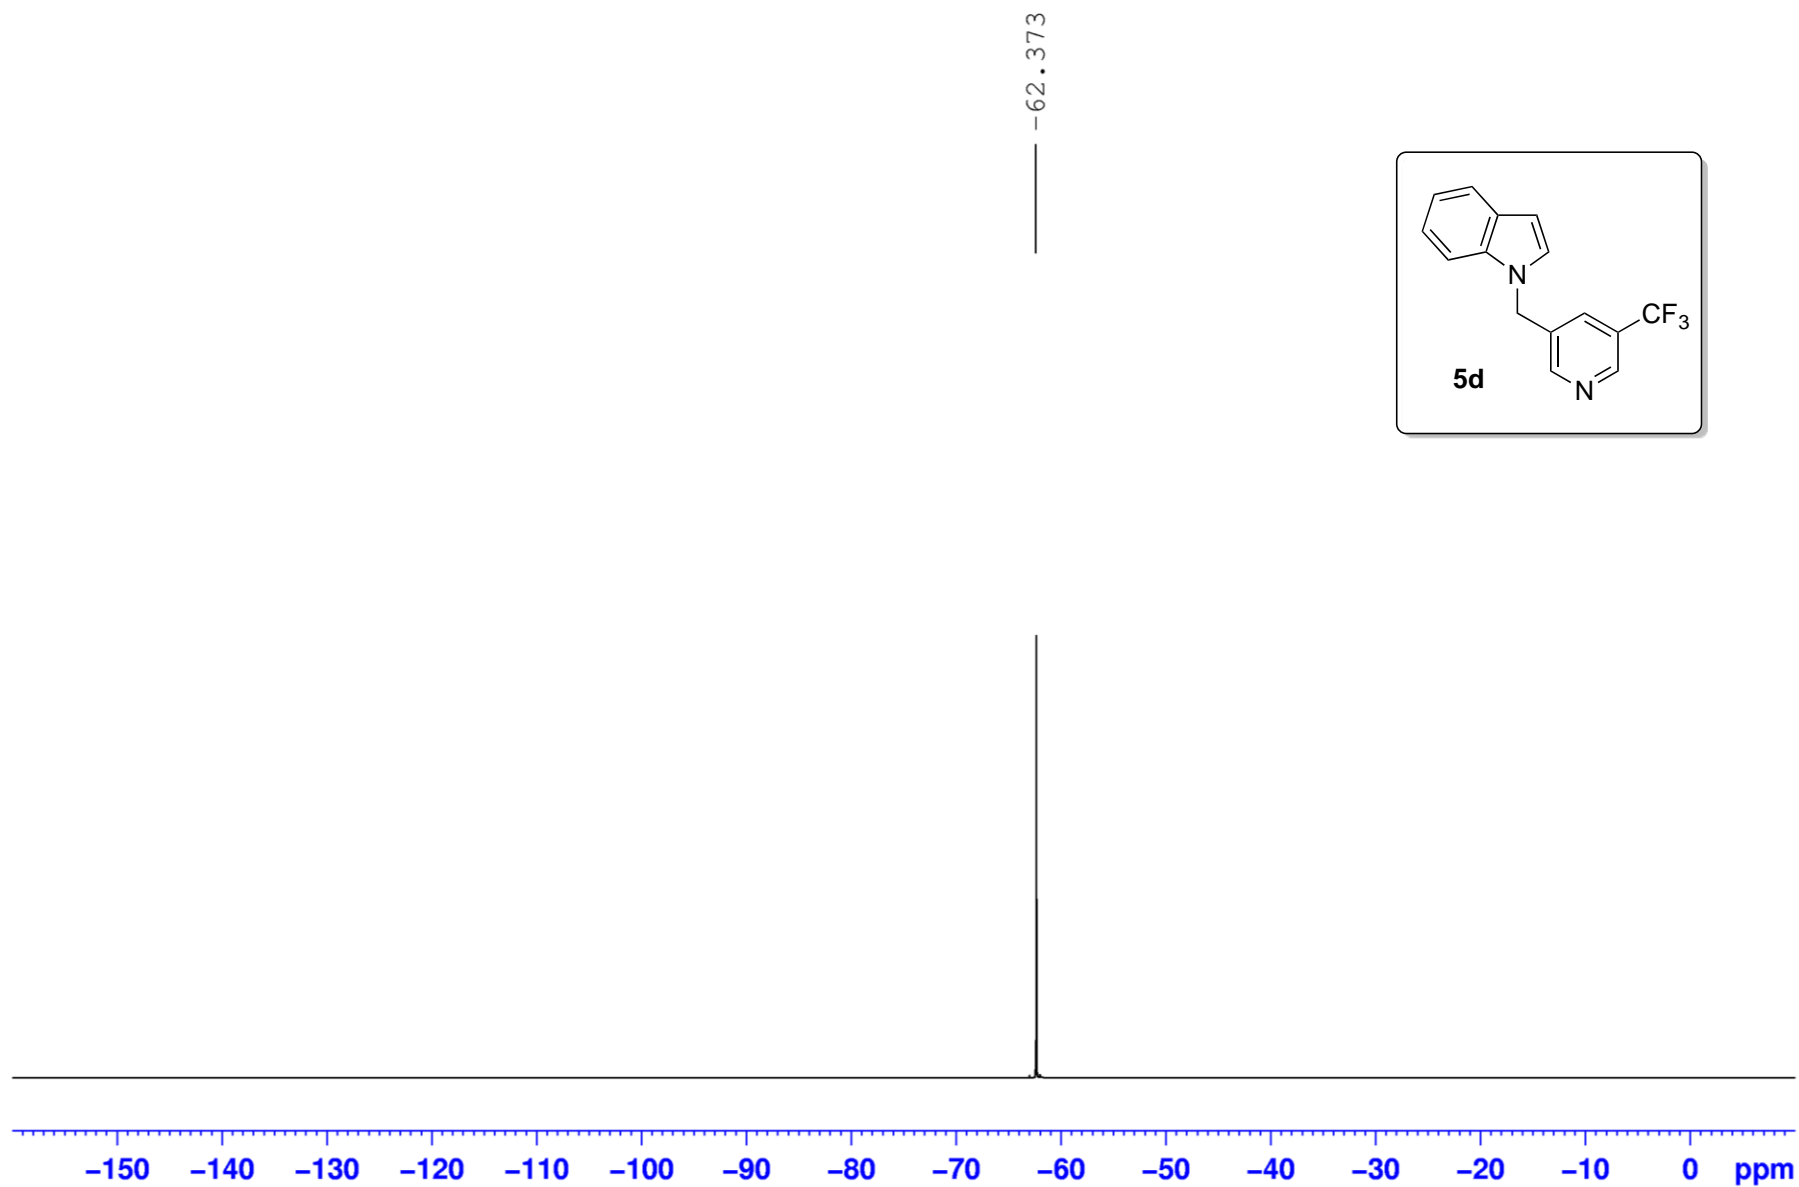

$^1\text{H}$  NMR ( $\text{CDCl}_3$ , 300 MHz) spectrum of 1-(pyrazin-2-ylmethyl)-1*H*-indole (**5e**)

8.574  
8.566  
8.561  
8.499  
8.493  
8.180  
7.705  
7.702  
7.677  
7.337  
7.310  
7.282  
7.277  
7.255  
7.250  
7.245  
7.227  
7.223  
7.201  
7.196  
7.187  
7.182  
7.157  
7.137  
7.133  
6.643  
6.633  
5.501

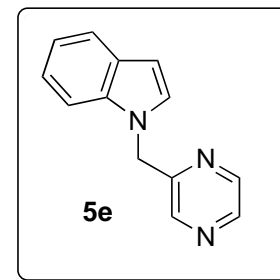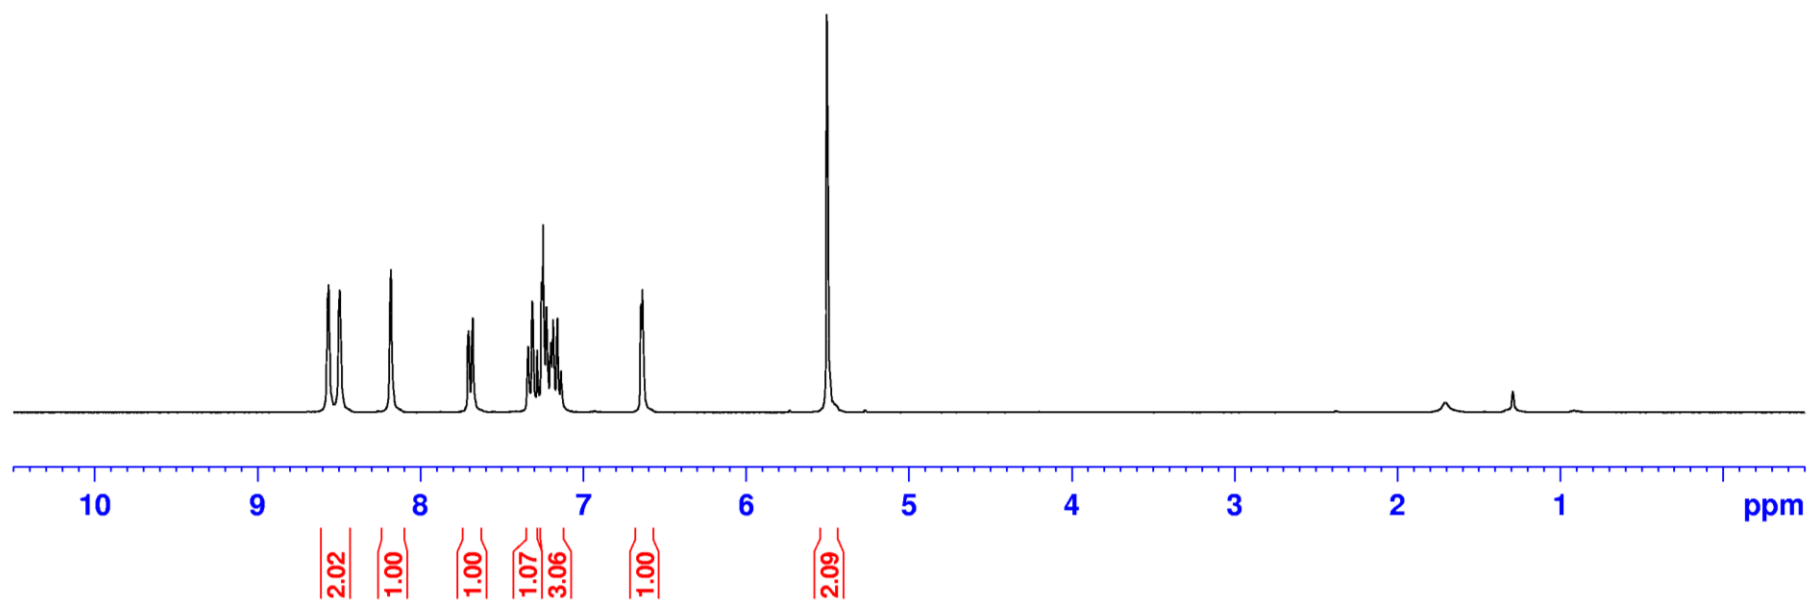

$^{13}\text{C}$  NMR ( $\text{CDCl}_3$ , 75.4 MHz) spectrum of 1-(pyrazin-2-ylmethyl)-1*H*-indole (**5e**)

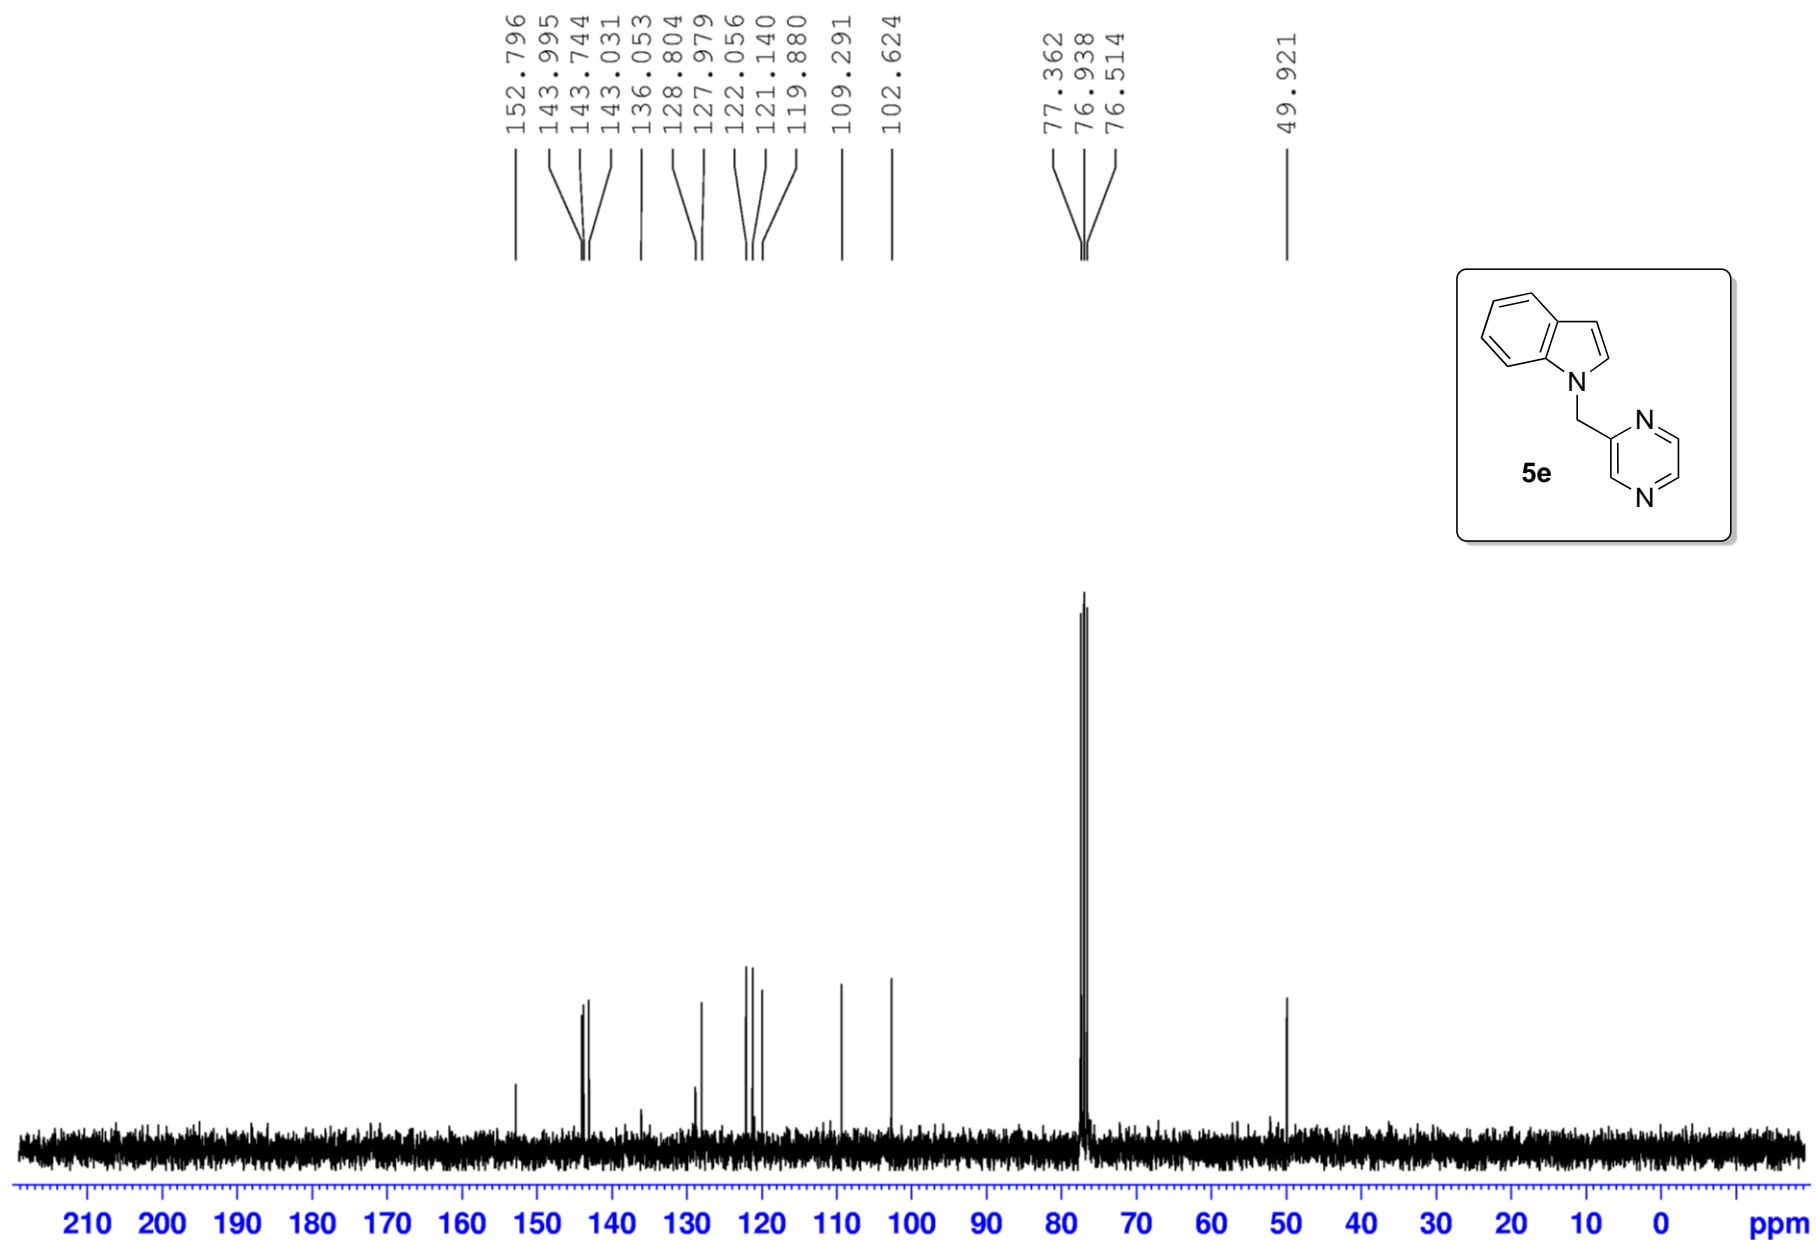



$^1\text{H}$  NMR ( $\text{CDCl}_3$ , 300 MHz) spectrum of 6-((1*H*-indol-1-yl)methyl)quinolone (**5f**)

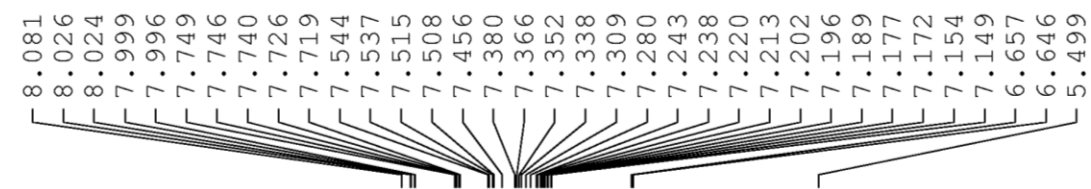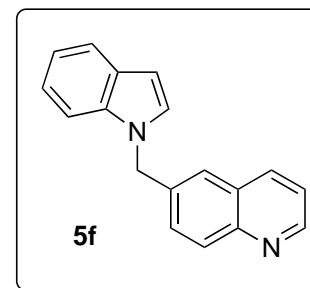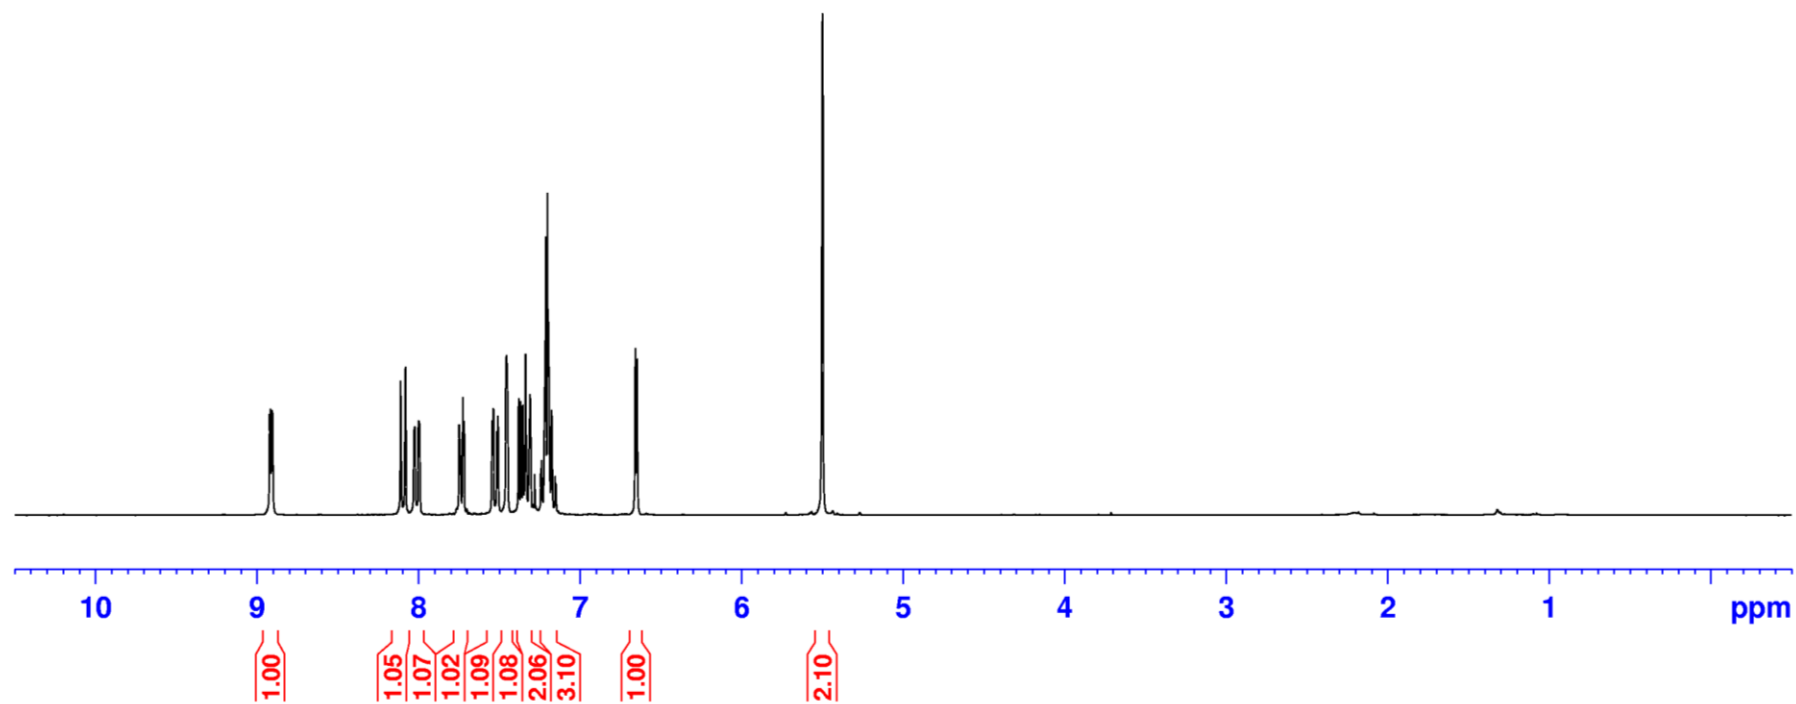

$^{13}\text{C}$  NMR ( $\text{CDCl}_3$ , 75.4 MHz) spectrum of 6-((1*H*-indol-1-yl)methyl)quinolone (**5f**)

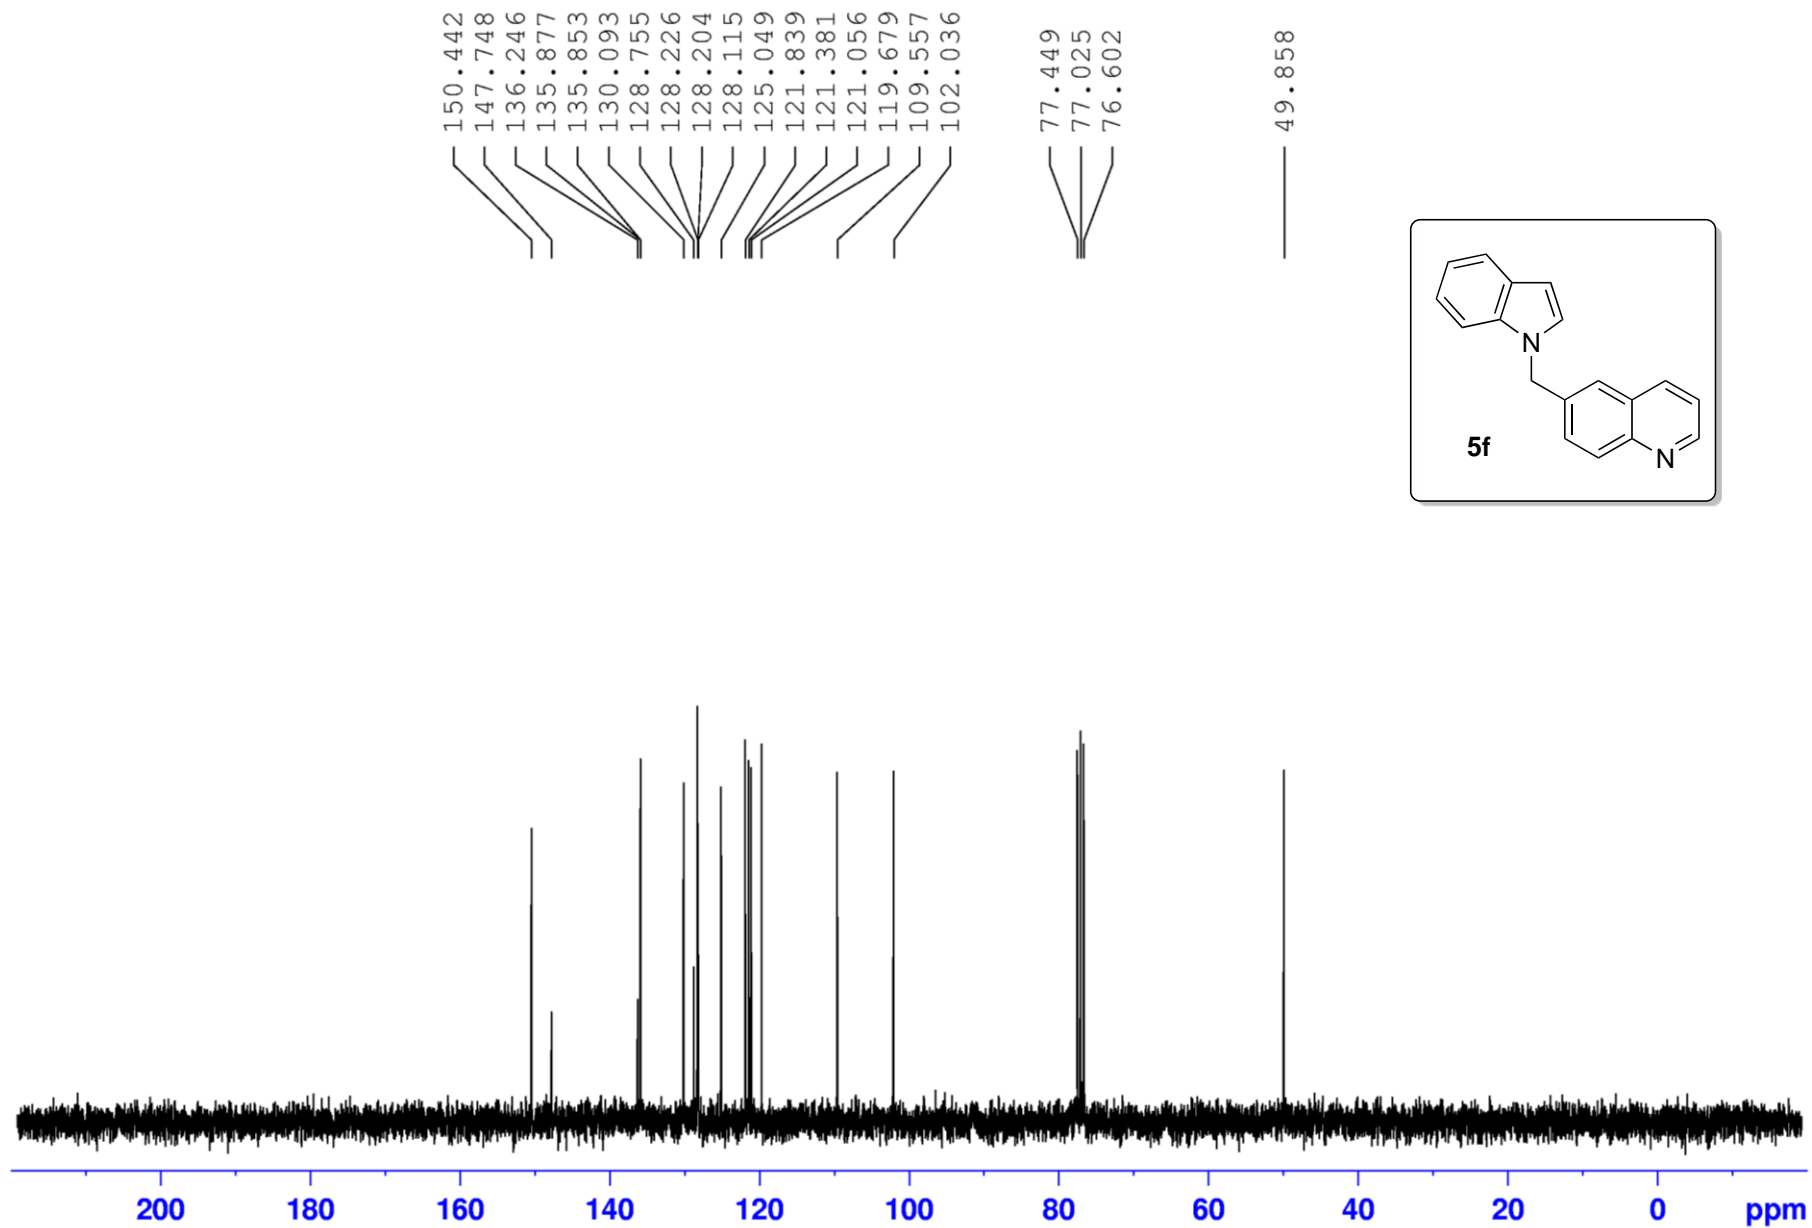

$^1\text{H}$  NMR ( $\text{CDCl}_3$ , 360 MHz) spectrum of 5-((1*H*-indol-1-yl)methyl)quinolone (**5g**)

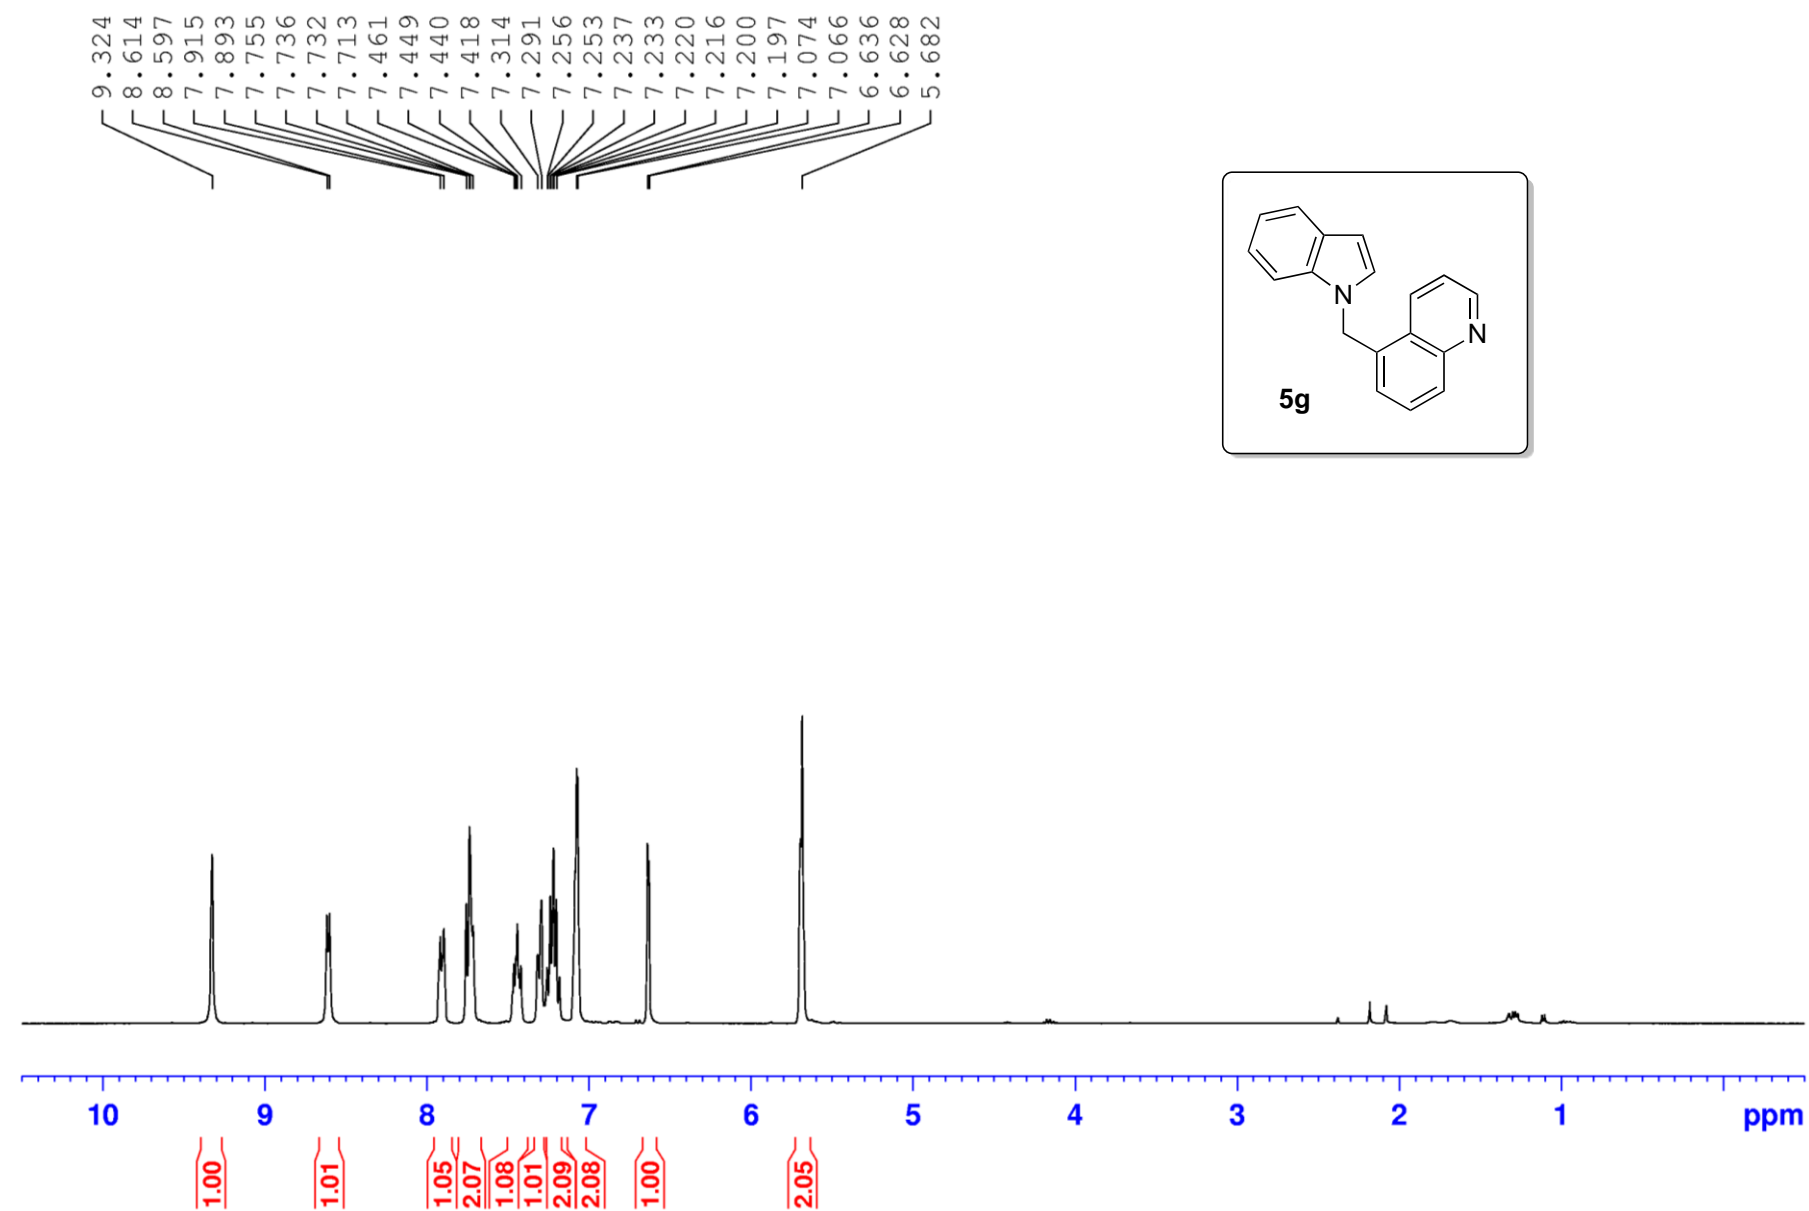

$^{13}\text{C}$  NMR ( $\text{CDCl}_3$ , 90.5 MHz) spectrum of 5-((1*H*-indol-1-yl)methyl)quinoline (**5g**)

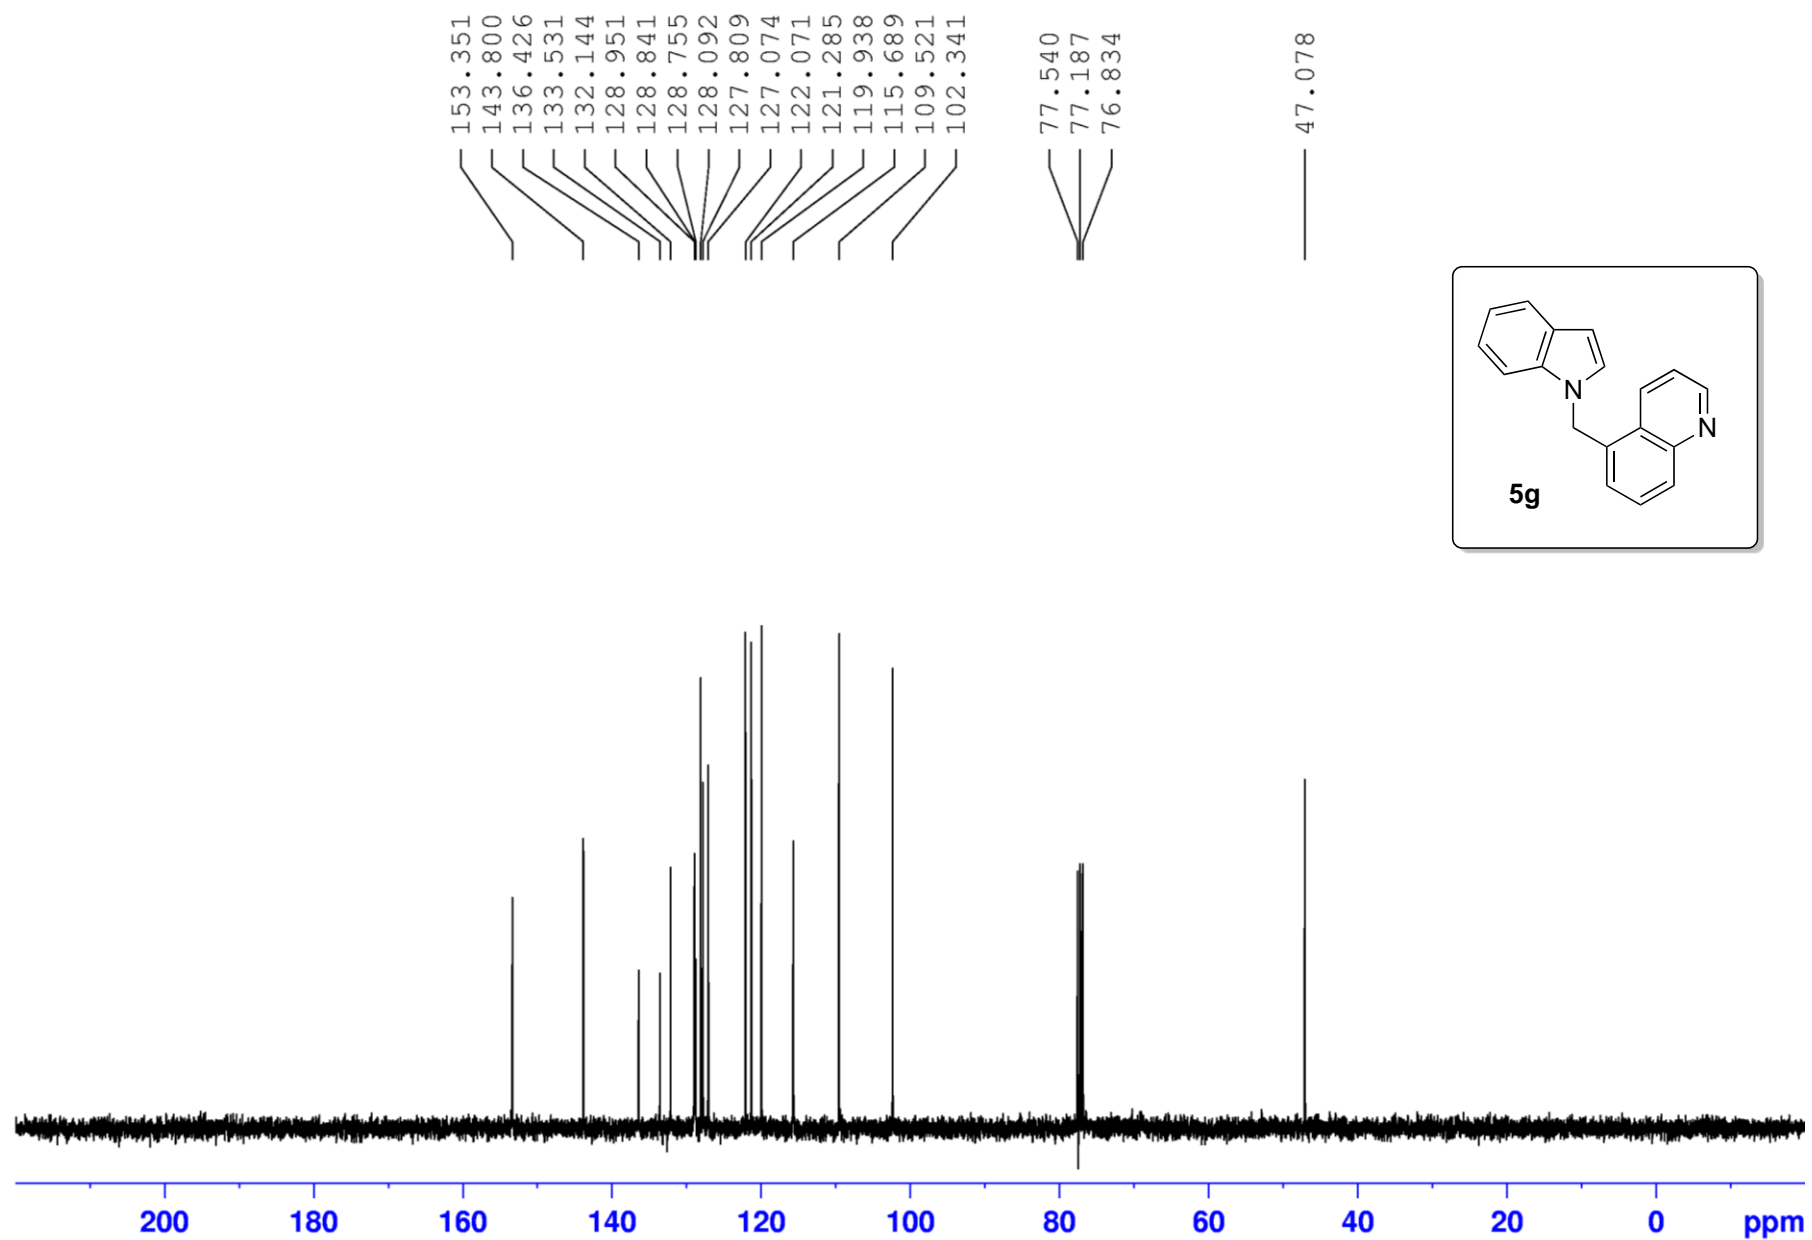

$^1\text{H}$  NMR ( $\text{CDCl}_3$ , 300 MHz) spectrum of *tert*-butyl-5-((1*H*-Indol-1-yl)methyl)-1*H*-indole-1-carboxylate (**5h**)

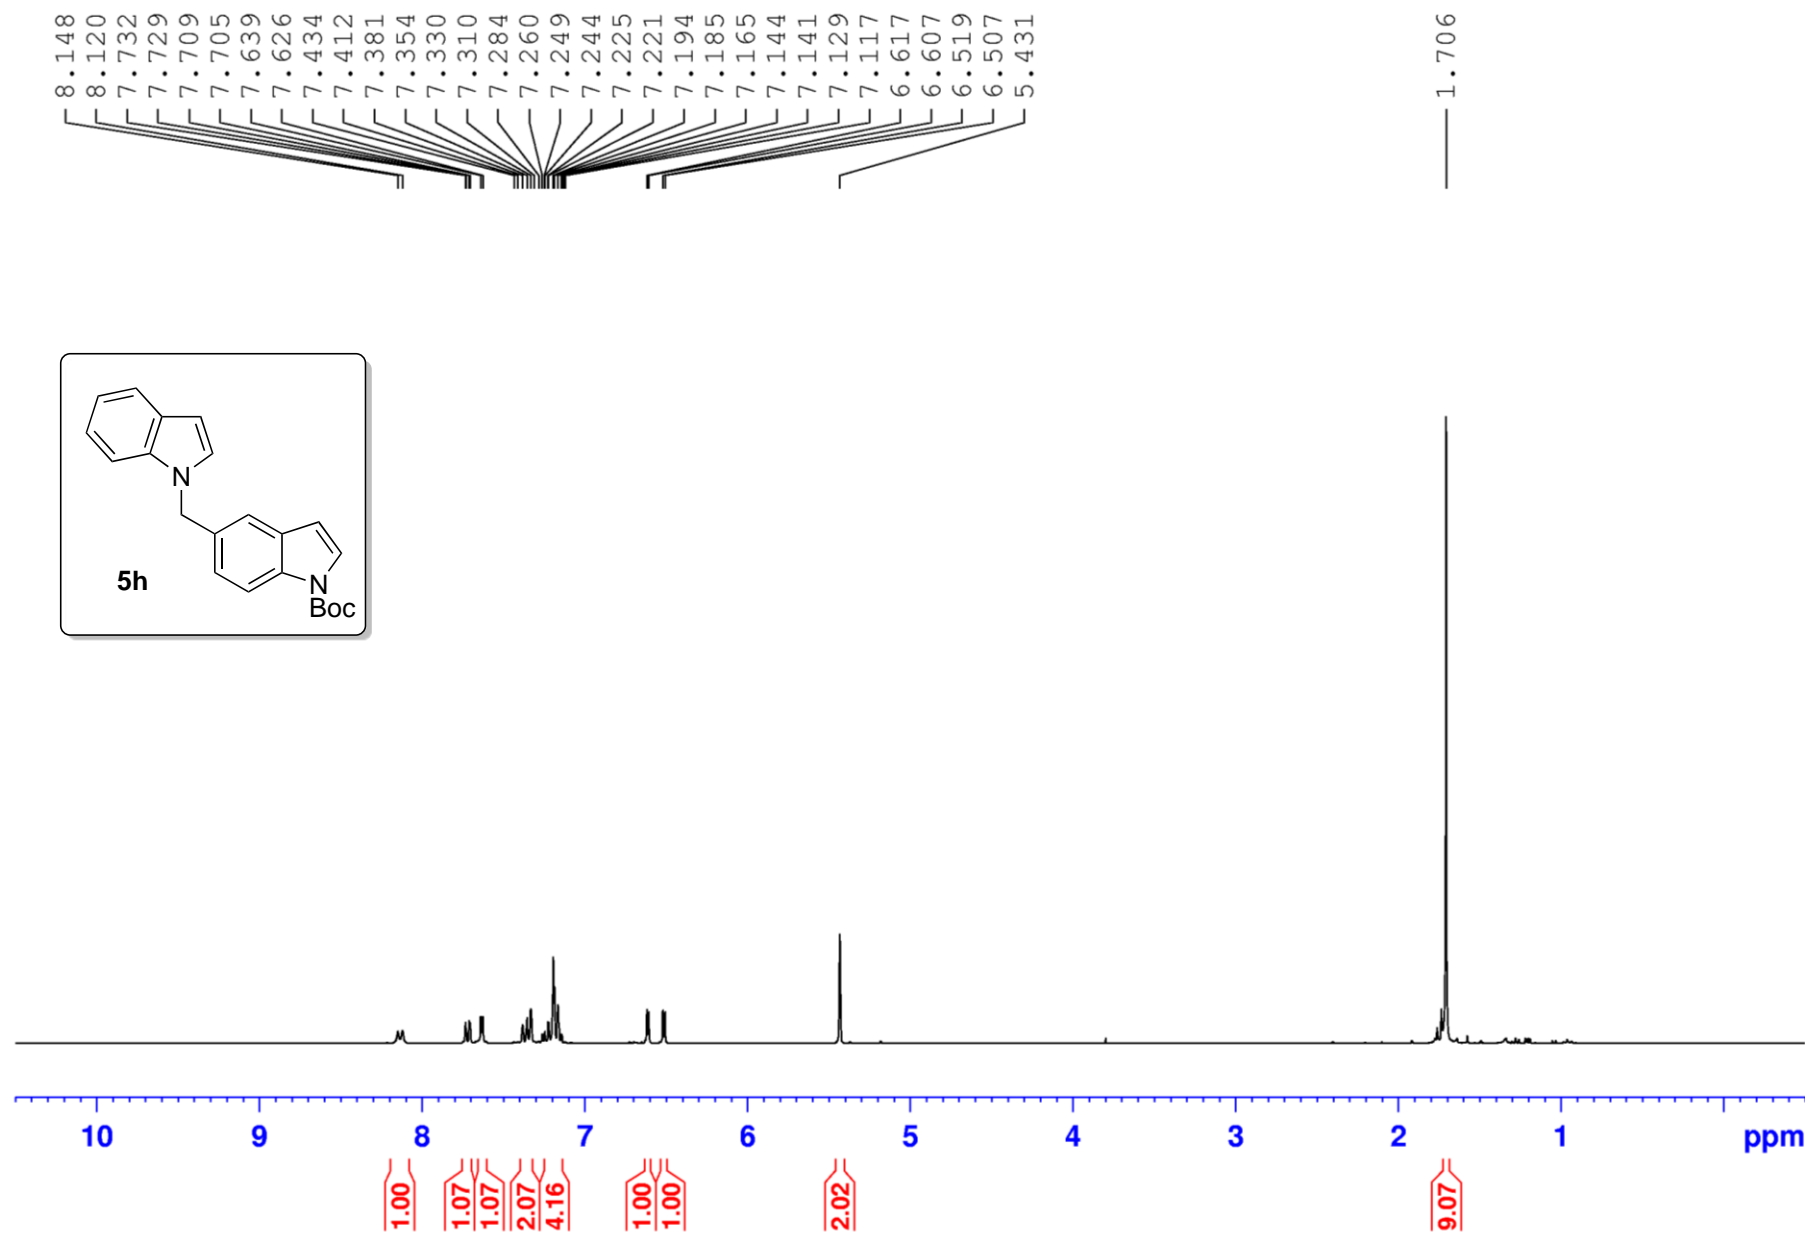

$^{13}\text{C}$  NMR ( $\text{CDCl}_3$ , 75.4 MHz) spectrum of *tert*-butyl-5-((1*H*-Indol-1-yl)methyl)-1*H*-indole-1-carboxylate (**5h**)

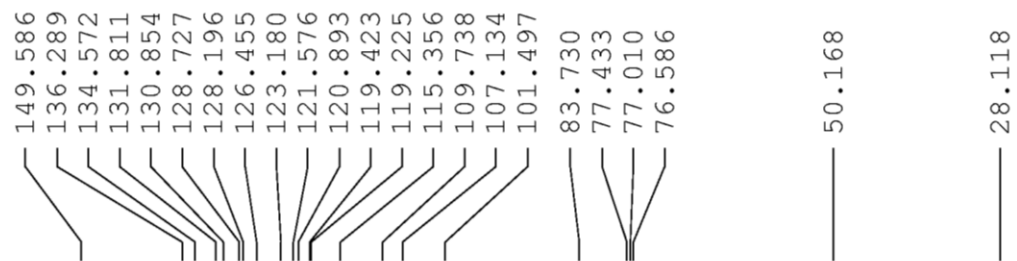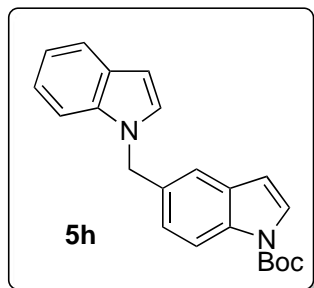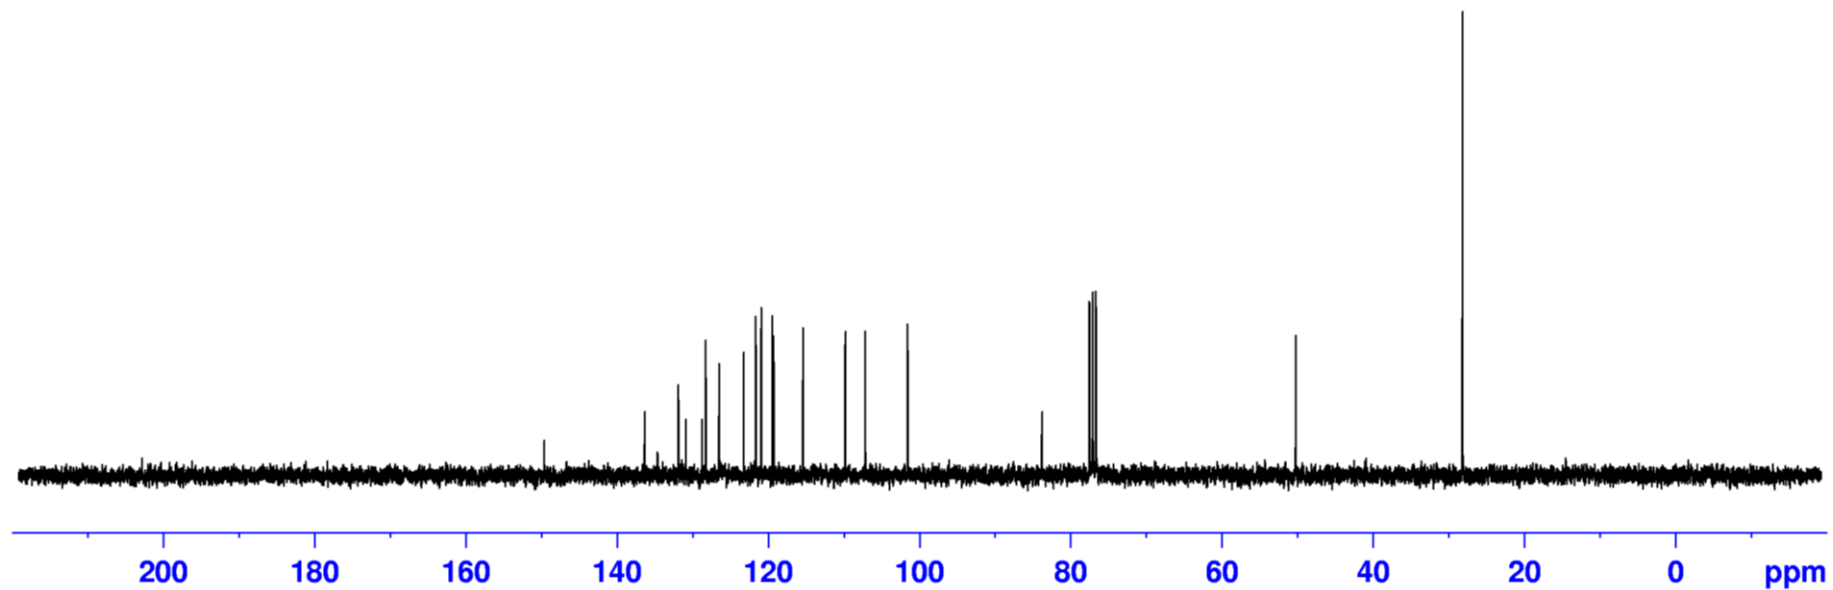

$^1\text{H}$  NMR ( $\text{CDCl}_3$ , 300 MHz) spectrum of 2,6-bis((1*H*-indol-1-yl)methyl)pyridine (**5i**)

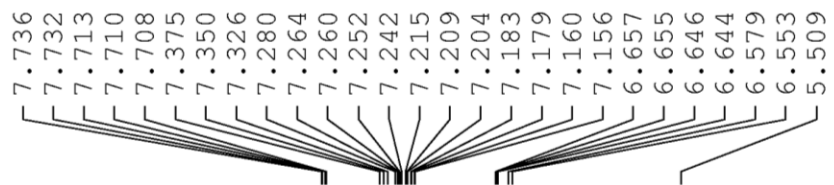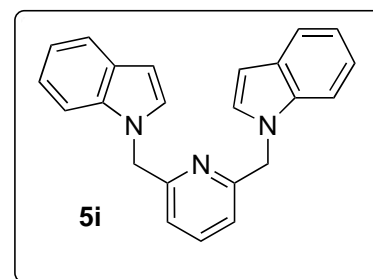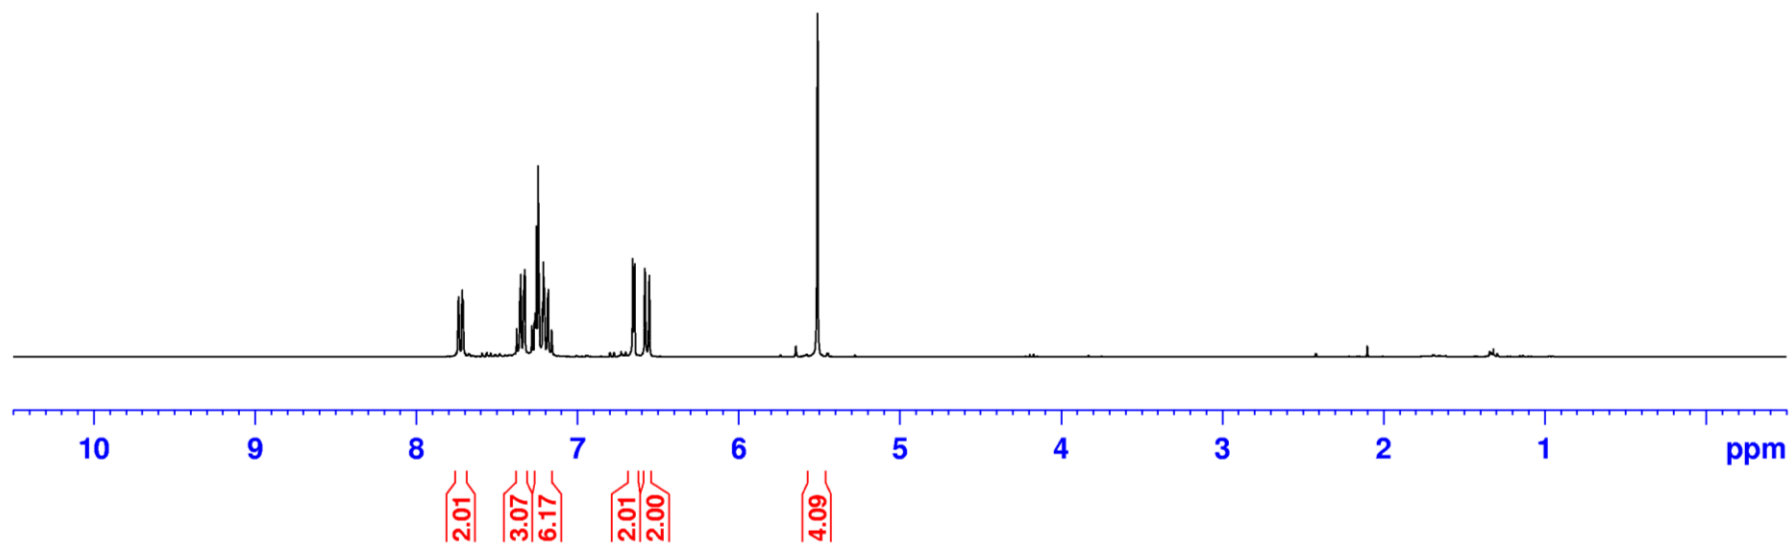

$^{13}\text{C}$  NMR ( $\text{CDCl}_3$ , 75.4 MHz) spectrum of 2,6-bis((1*H*-indol-1-yl)methyl)pyridine (**5i**)

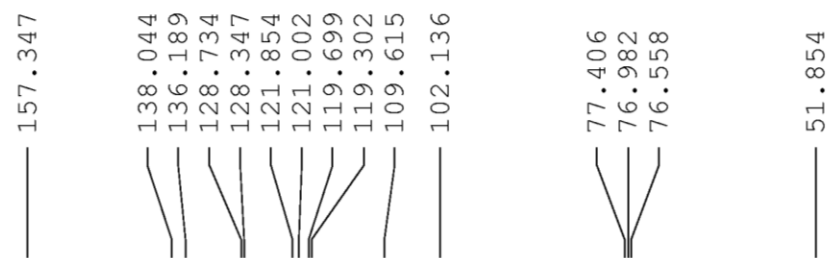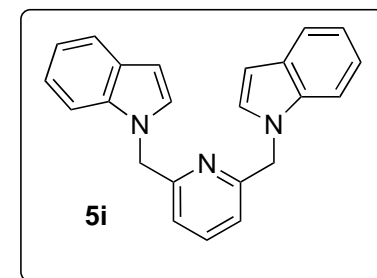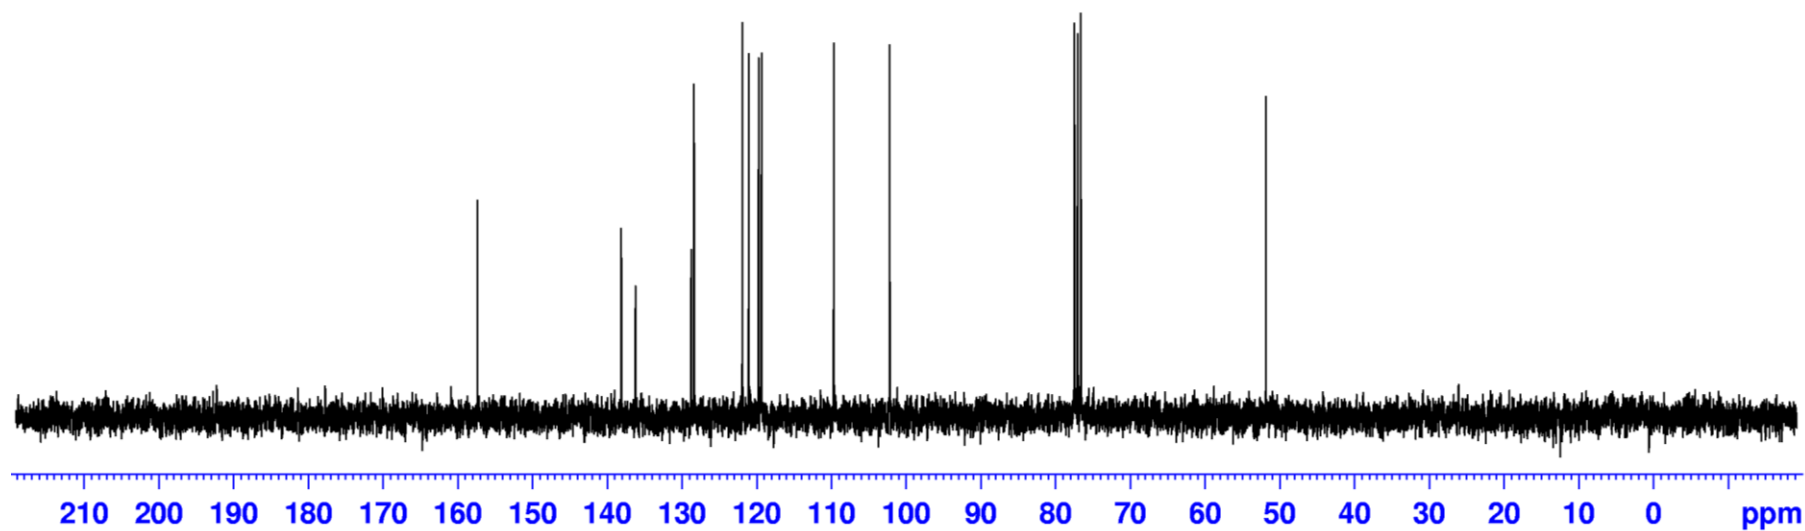

Supplement: NIHMS498852-supplement-1_si_001.pdf [file NIHMS498852-supplement-1_si_001.pdf]
